# Supplementary material for: Nickel/Brønsted acid dual-catalyzed regio- and enantioselective hydrophosphinylation of 1,3-dienes: access to chiral allylic phosphine oxides
Source: Royal Society of Chemistry journal article supplement (doi:10.1039/d1sc05651d), 2021-12-28
Supplement: d1sc05651d1.pdf [file d1sc05651d1.pdf]

Supplementary Information

**Nickel/Brønsted Acid Dual-Catalyzed Regio- and  
Enantioselective Hydrophosphinylation of 1,3-Dienes: Access  
to Chiral Allylic Phosphine Oxides**

*Jiao Long,<sup>a</sup> Yuqiang Li,<sup>a</sup> Weining Zhao,<sup>\*,b</sup> Guoyin Yin<sup>\*,a</sup>*

<sup>a</sup> The Institute for Advanced Studies, Wuhan University, Wuhan 430072, China

<sup>b</sup> College of Pharmacy, Shenzhen Technology University, Shenzhen 518118,  
China

\*corresponding author,

E-mails: zhaoweining@sztu.edu.cn

yinguoyin@whu.edu.cn

## Table of Contents

|                                                                                              |     |
|----------------------------------------------------------------------------------------------|-----|
| 1. General Information .....                                                                 | 1   |
| 2. Preparation of Substrates.....                                                            | 1   |
| 3. Reaction Optimization.....                                                                | 3   |
| 4. General Procedure for Ni-catalyzed Asymmetric Hydrophosphinylation of 1,3-Dienes<br>..... | 5   |
| 5. Kinetic Resolution/Dynamic Kinetic Resolution Investigations.....                         | 23  |
| 6. Scale-up Reaction and Derivatization of the Product.....                                  | 24  |
| 7. Deuterium-Labeled Experiments .....                                                       | 25  |
| 8. Cross-Over Experiments .....                                                              | 29  |
| 9. Reaction Profiles .....                                                                   | 30  |
| 10. DFT Calculation .....                                                                    | 31  |
| 11. References.....                                                                          | 47  |
| 12. NMR Spectra .....                                                                        | 49  |
| 13. HPLC Spectra.....                                                                        | 119 |

## 1. General Information

Unless otherwise noted, all reagents and solvents were purchased from commercial suppliers (Energy Chemical, Adamas-beta®, J&K, laajoo and so on) and used without further purification. All reactions were assembled on a Schlenk vacuum line or in a glovebox using oven-dried glass tube and were stirred with Teflon-coated magnetic stirring bars unless otherwise specified. Reactions were monitored using thin-layer chromatography (TLC), visualization of the developed plates was performed under UV light (254 nm) or KMnO<sub>4</sub> stain. Purification and isolation of products were performed *via* silica gel (300-400 mesh) chromatography. <sup>1</sup>H, <sup>2</sup>H, <sup>13</sup>C, <sup>31</sup>P and <sup>19</sup>F NMR spectra were recorded on Bruker 400 MHz or 600 MHz spectrometer. <sup>1</sup>H NMR spectra were internally referenced to TMS. <sup>13</sup>C NMR spectra were internally referenced to the residual solvent signal. Data are reported as follows: chemical shift ( $\delta$  ppm), multiplicity (s = singlet, d = doublet, t = triplet, q = quartet, dd = doublet of doublet, dt = doublet of triplet, ddd = doublet of doublet of doublet, m = multiplet), coupling constants (Hz) and integration. GC analysis were performed on a Shimadzu GC-2010 Pro gas chromatograph with an FID detector. High resolution mass spectra (HRMS) were measured with a Thermo Orbitrap Elite instrument (ESI). High pressure liquid chromatography (HPLC) was performed on Agilent 1260 Series chromatographs using Daicel Chiralcel columns (250 mm). Optical rotations were measured on a Perkin Elmer 343 polarimeter using a 100 mm pathlength cell at 589 nm with  $[\alpha]_D$  values reported in degrees; concentration (c) is in g/100 mL. Melting points (m.p.) were obtained on SGW® X-4 micro melting point apparatus.

## 2. Preparation of Substrates

Internal 1,3-dienes **1a-1j** used in this work were prepared according to literature procedure<sup>[1, 2]</sup> and were obtained in *E,Z/E,E* mixture form. The ratios of *E,Z/E,E* are listed as **Figure S1**. Terminal 1,3-dienes **1k-1r** used here have been reported in our previous work.<sup>[2]</sup> 1,3-Diene **1h** was commercially available (**Figure S2**).

Symmetric phosphine oxides **2c-2k** and **2r** used here were known compounds and synthesized according to reported methods,<sup>[3]</sup> **2a**, **2b**, **2h**, **2i** and **2q** were commercially available (**Figure S3**). Unsymmetric phosphine oxides **2l-2p** used here were prepared according to literature procedure (**Figure S4**).<sup>[4, 5]</sup>

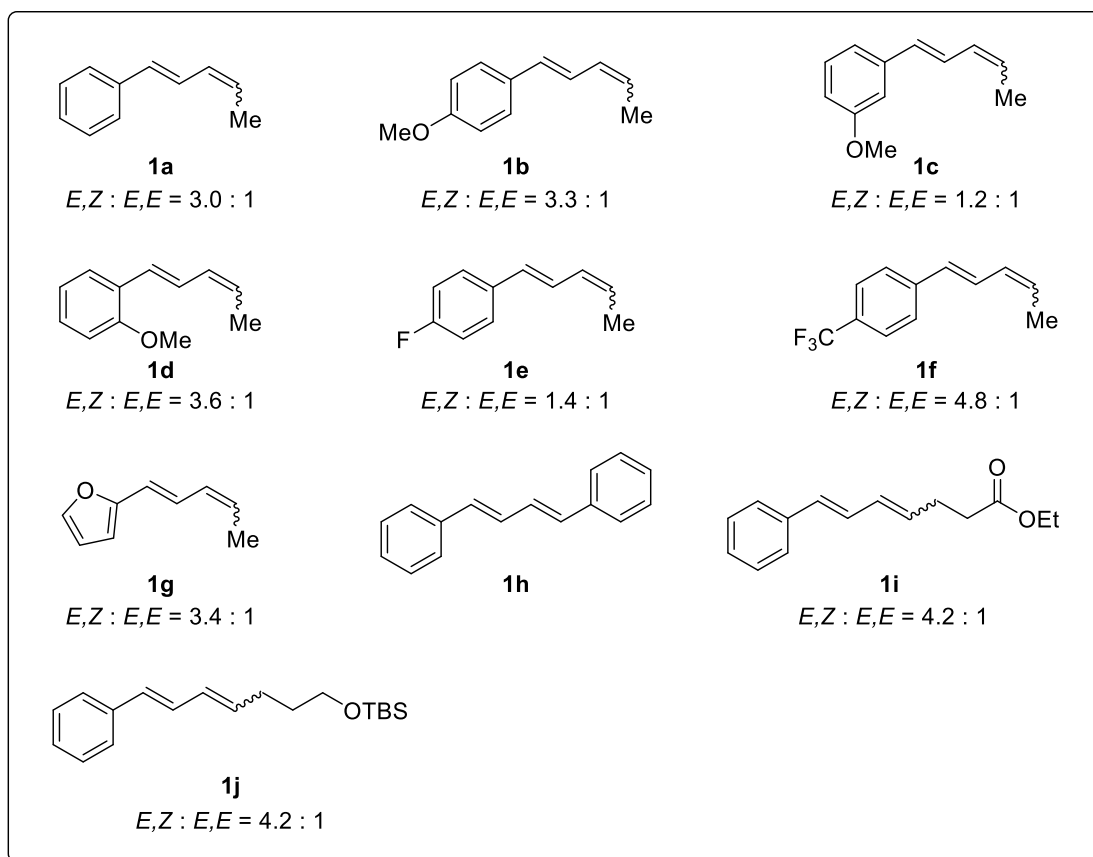

**Figure S1.** Internal 1,3-dienes used in this work.

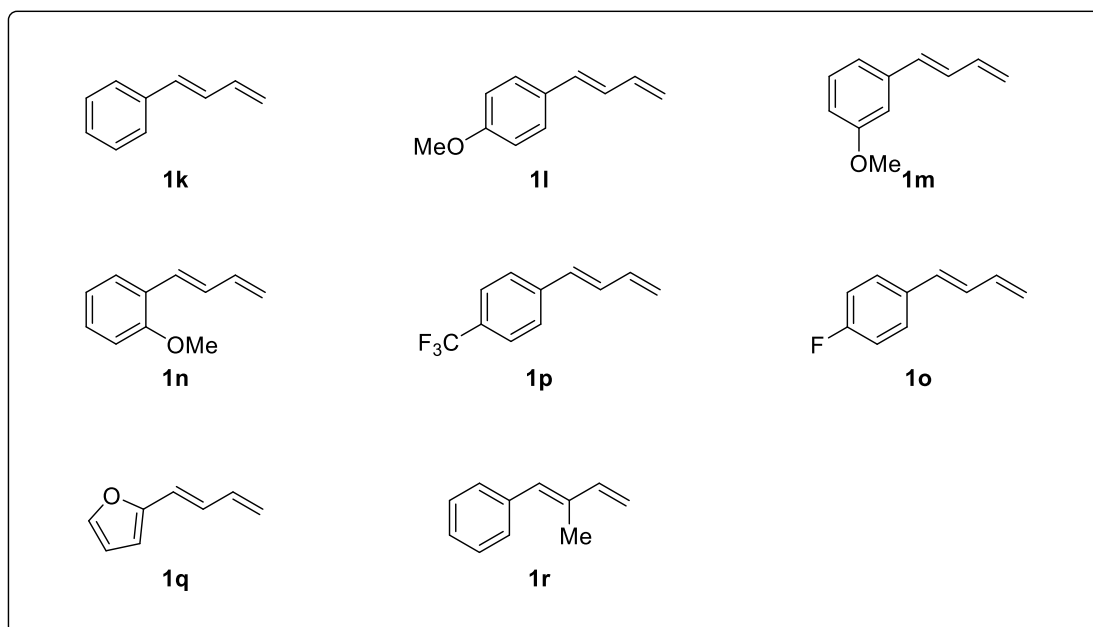

**Figure S2.** Terminal 1,3-dienes used in this work.

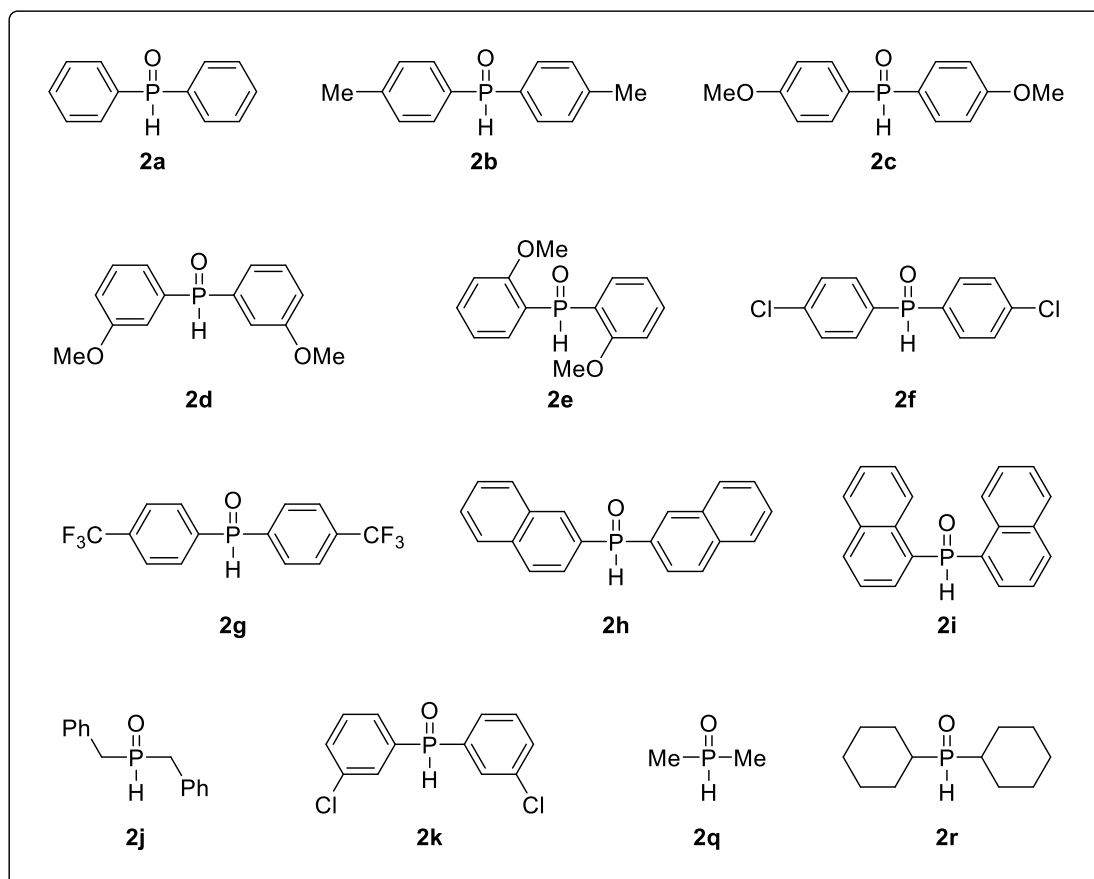

**Figure S3.** Symmetric phosphine oxides used in this work.

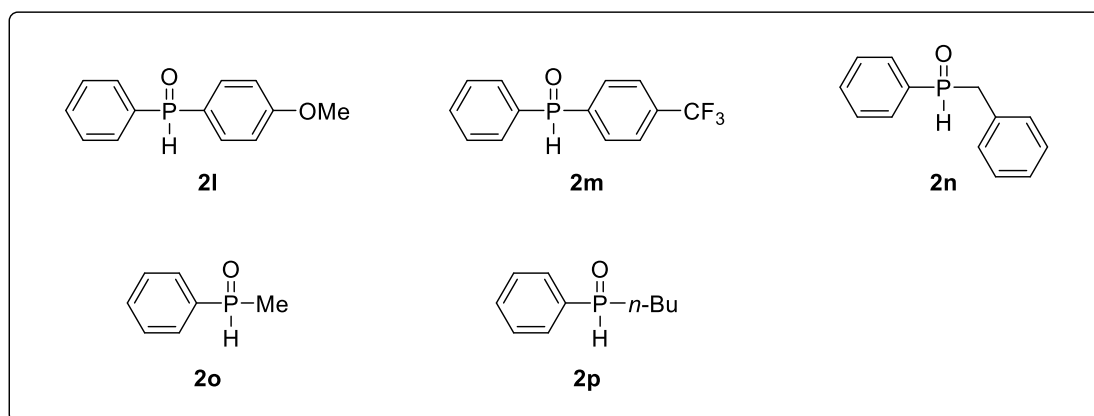

**Figure S4.** Unsymmetric phosphine oxides used in this work.

### 3. Reaction Optimization

**General method A:** a reaction tube was charged with  $\text{Ni}(\text{COD})_2$  (2.8 mg, 0.01 mmol, 0.05 equiv vs SPO), chiral ligand (0.01 mmol, 0.05 equiv vs SPO), acid (0.01 mmol, 0.05 equiv vs SPO), diphenylphosphine oxide **2a** (0.2 mmol, 1.0 equiv) and 1.0 mL solvent in an argon-filled glovebox, then 1,3-dienes **1a** (38  $\mu\text{L}$ , 0.24 mmol, 1.2 equiv vs SPO) was added. The reaction vessel was sealed using a PTFE septum and removed from the glovebox, and the mixture was

stirred at 100 °C for 24 h. The crude product was used to determine the regioselectivity by <sup>31</sup>P NMR analysis. Yields were determined by gas chromatogram analysis, using naphthalene as the internal standard. The ee values were determined by HPLC on a chiral stationary phase.

**Table S1.** Ligand screening for Ni-catalyzed asymmetric hydrophosphinylation of **1a**.<sup>[a]</sup>

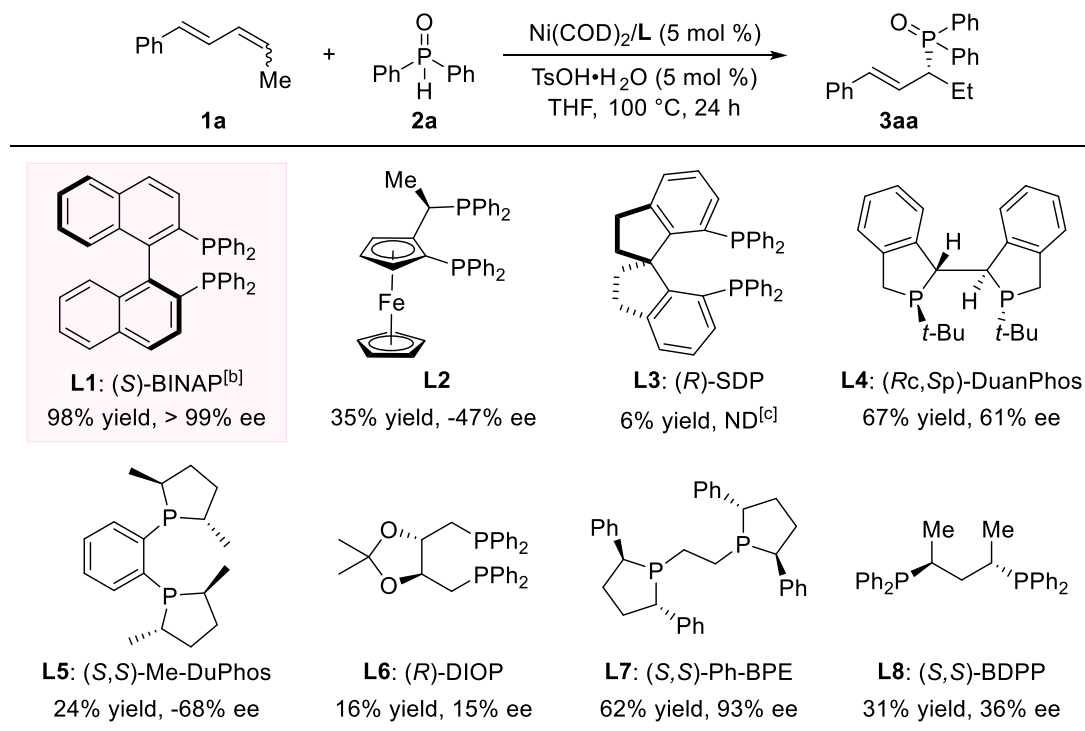

[a] Unless otherwise noted, all reactions were carried out with 0.24 mmol **1a** (*E,Z*: *E,E* = 3.0:1), 0.20 mmol **2a**, 5.0 mol % Ni(COD)<sub>2</sub>, 5.0 mol % ligand, 5.0 mol % TsOH·H<sub>2</sub>O in 1 mL THF at 100 °C for 24 h. Yields were determined by gas chromatogram analysis, using naphthalene as the internal standard. *rr* > 20:1, which is determined by <sup>31</sup>P NMR analysis of reaction mixture. *ee* values were determined by HPLC analysis using a chiral stationary phase. [b] Isolated yield. [c] Not determined.

**Table S2.** Solvent screening for the Ni-catalyzed asymmetric hydrophosphinylation of **1a**.<sup>[a]</sup>

Reaction scheme showing the hydrophosphinylation of **1a** (Ph-CH=CH-CH=CH-Me) with **2a** (Ph<sub>3</sub>P=O) using Ni(COD)<sub>2</sub>/L1 (5 mol %) and TsOH·H<sub>2</sub>O (5 mol %) in solvent at 100 °C for 24 h to yield **3aa** (Ph-CH=CH-CH(Ph)-CH<sub>2</sub>-Et).

| Entry | Solvent     | Yield [%]         | ee [%]            |
|-------|-------------|-------------------|-------------------|
| 1     | toluene     | 68                | > 99              |
| 2     | 1,4-dioxane | 59                | 98                |
| 3     | THF         | 98 <sup>[b]</sup> | > 99              |
| 4     | MTBE        | 38                | 94                |
| 5     | CpME        | 40                | > 99              |
| 6     | DMF         | 9                 | ND <sup>[c]</sup> |
| 7     | DCE         | 6                 | ND <sup>[c]</sup> |

|                          |     |       |                   |
|--------------------------|-----|-------|-------------------|
| <b>8</b>                 | EA  | 71    | 95                |
| <b>9</b> <sup>[d]</sup>  | THF | 92    | > 99              |
| <b>10</b> <sup>[e]</sup> | THF | 33    | > 99              |
| <b>11</b> <sup>[f]</sup> | THF | trace | ND <sup>[c]</sup> |

[a] Unless otherwise noted, all reactions were carried out with 0.24 mmol **1a** (*E,Z*: *E,E* = 3.0:1), 0.20 mmol **2a**, 5.0 mol % Ni(COD)<sub>2</sub>, 5.0 mol % ligand, 5.0 mol % TsOH·H<sub>2</sub>O in 1 mL THF at 100 °C for 24 h. Yields were determined by gas chromatogram analysis, using naphthalene as the internal standard. *rr* > 20:1, which is determined by <sup>31</sup>P NMR analysis of reaction mixture. *ee* values were determined by HPLC analysis using a chiral stationary phase. [b] Isolated yield. [c] Not determined. [d] 80 °C. [e] 50 °C. [f] 25 °C.

**Table S3.** Acid additives screening for Ni-catalyzed asymmetric hydrophosphinylation of **1a**.<sup>[a]</sup>

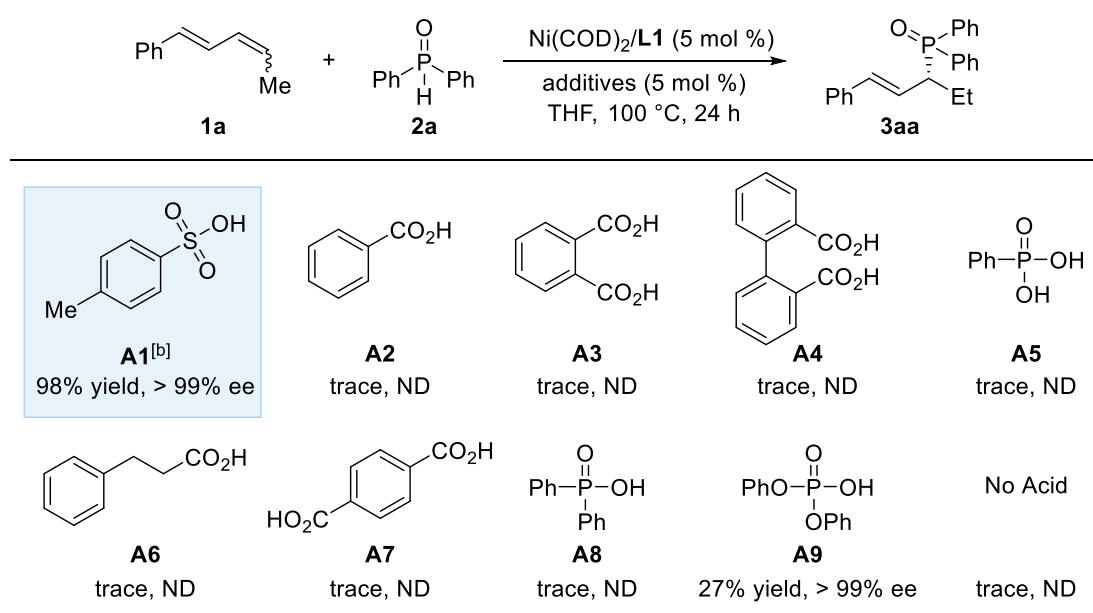

[a] Unless otherwise noted, all reactions were carried out with 0.24 mmol **1a** (*E,Z*: *E,E* = 3.0:1), 0.20 mmol **2a**, 5.0 mol % Ni(COD)<sub>2</sub>, 5.0 mol % ligand, 5.0 mol % TsOH·H<sub>2</sub>O in 1 mL THF at 100 °C for 24 h. Yields were determined by gas chromatogram analysis, using naphthalene as the internal standard. *rr* > 20:1, which is determined by <sup>31</sup>P NMR analysis of reaction mixture. *ee* values were determined by HPLC analysis using a chiral stationary phase. ND means not determined. [b] Isolated yield.

#### 4. General Procedure for Ni-catalyzed Asymmetric Hydrophosphinylation of 1,3-Dienes

##### Scheme S1:

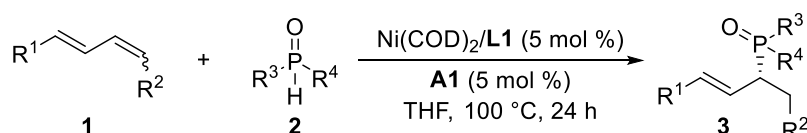

A reaction tube was charged with Ni(COD)<sub>2</sub> (2.8 mg, 0.01 mmol, 0.05 equiv vs SPO), (*S*)-BINAP (6.3 mg, 0.01 mmol, 0.05 equiv vs SPO), TsOH·H<sub>2</sub>O (1.9 mg, 0.01 mmol, 0.05 equiv vs SPO), secondary phosphine oxides **2** (0.2 mmol, 1.0 equiv) and 1.0 mL THF in an argon-filled glovebox, then 1,3-dienes **1** (0.24 mmol, 1.2 equiv vs SPO) was added. The reaction vessel

was sealed using a PTFE septum and removed from the glovebox, and the mixture was stirred at 100 °C for 24 h. After complete conversion, the resulting mixture was cooled to rt, and the crude product was used to determine the regioselectivity by <sup>31</sup>P NMR analysis. Then the residue was purified by SiO<sub>2</sub> column chromatography to give the desired product. The ee values of all compounds **3** were determined by HPLC on a chiral stationary phase.

**Table S4.** Non-reactive and inefficient substrates.

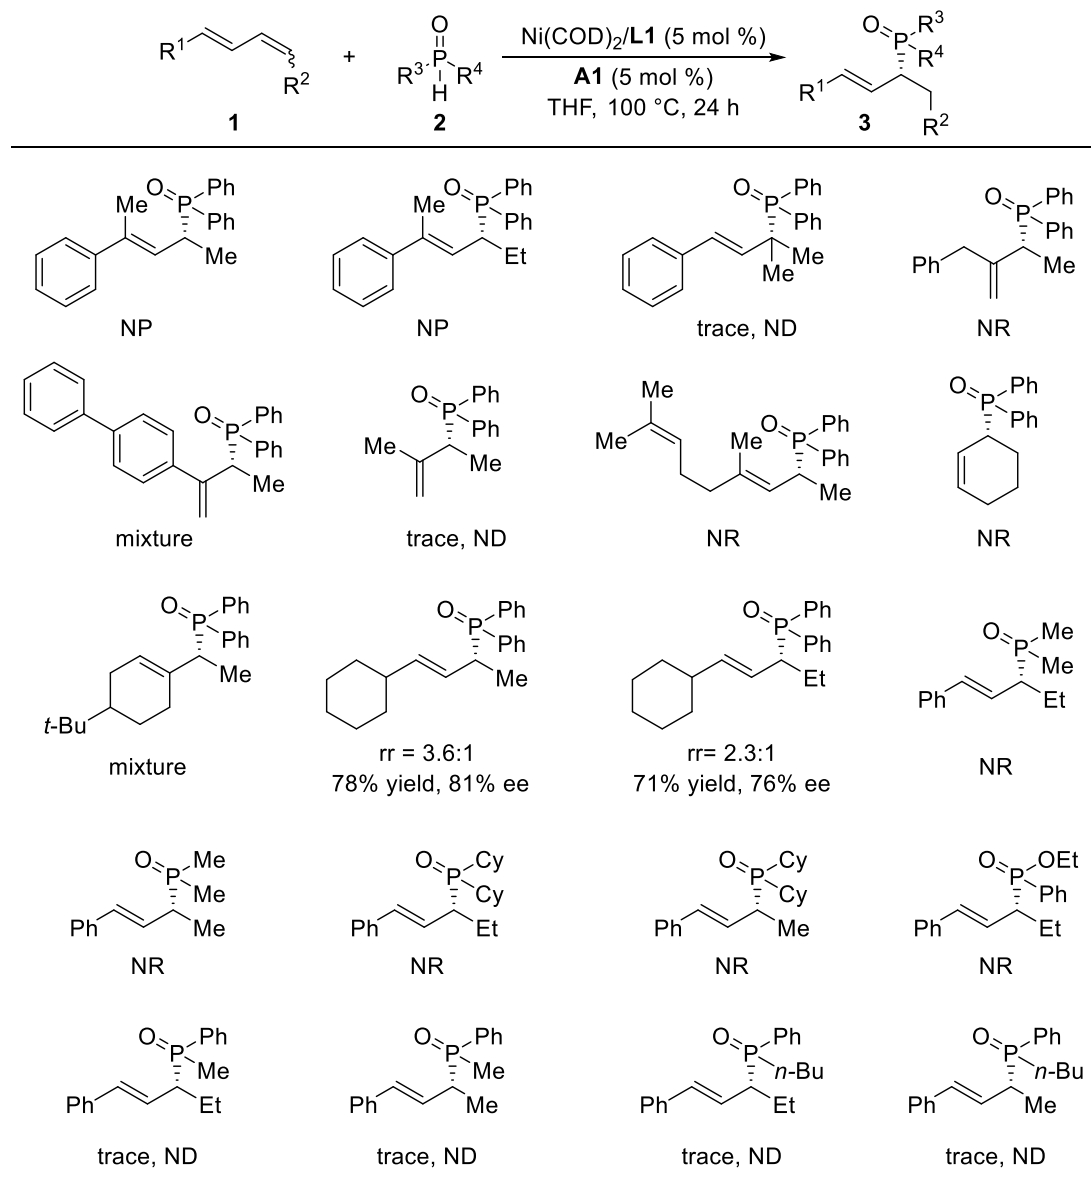

**(*R,E*)-diphenyl(1-phenylpent-1-en-3-yl)phosphine oxide (3aa):** > 20:1 rr; white solid 67.6 mg;

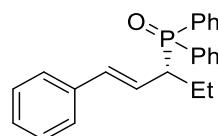

m.p. 185.4-187.9 °C; isolated yield 98%; > 99% ee; [ $\alpha$ ]<sub>D</sub><sup>25</sup> = +156.9 (c = 1.0, CHCl<sub>3</sub>); The enantiomeric excess was determined by HPLC on Chiralpak OJ-H column, hexane: isopropanol = 95:5, flow rate = 0.5 mL/min, UV detection at 254 nm, t<sub>R</sub> = 16.2 min (major), 19.1 min (minor); <sup>1</sup>H NMR (400 MHz, CDCl<sub>3</sub>) δ 7.89-7.83 (m, 2H), 7.78-7.72 (m, 2H), 7.55-7.37 (m, 6H), 7.28-7.17 (m, 5H), 6.29 (dd,



$J = 15.9, 4.4$  Hz, 1H), 6.06 (ddd,  $J = 15.7, 9.7, 5.8$  Hz, 1H), 3.09-3.00 (m, 1H), 1.98-1.86 (m, 1H), 1.81-1.68 (m, 1H), 0.97 (t,  $J = 7.4$  Hz, 3H) ppm;  $^{13}\text{C NMR}$  (100 MHz,  $\text{CDCl}_3$ )  $\delta$  136.8 (d,  $J = 3.0$  Hz), 135.0 (d,  $J = 12.1$  Hz), 131.9 (dd,  $J = 94.5, 23.7$  Hz), 131.6 (dd,  $J = 14.8, 2.8$  Hz), 131.3 (dd,  $J = 16.6, 8.6$  Hz), 128.43, 128.41 (dd,  $J = 32.4, 11.4$  Hz), 127.4, 126.1 (d,  $J = 1.8$  Hz), 124.4 (d,  $J = 7.5$  Hz), 46.6 (d,  $J = 68.8$  Hz), 21.0 (d,  $J = 2.5$  Hz), 12.7 (d,  $J = 13.5$  Hz) ppm;  $^{31}\text{P NMR}$  (162 MHz,  $\text{CDCl}_3$ )  $\delta$  33.72 ppm. **HRMS (ESI)** calculated  $[\text{M}+\text{H}]^+$  for  $\text{C}_{23}\text{H}_{24}\text{OP} = 347.1559$ , found: 347.1550.

**(*R,E*)-(1-(4-methoxyphenyl)pent-1-en-3-yl)diphenylphosphine oxide (3ba):** > 20:1 rr; white

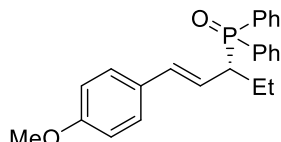

solid 56.6 mg; m.p.161.8-165.0 °C; isolated yield 75%; 97% ee;  $[\alpha]_{\text{D}}^{25} = +129.4$  ( $c = 1.0$ ,  $\text{CHCl}_3$ ); The enantiomeric excess was determined by HPLC on Chiralpak OJ-H column, hexane: isopropanol = 95:5, flow rate = 1.0 mL/min, UV detection at 254 nm,

$t_{\text{R}} = 14.9$  min (major), 17.8 min (minor);  $^1\text{H NMR}$  (400 MHz,  $\text{CDCl}_3$ )  $\delta$  7.87-7.82 (m, 2H), 7.77-7.72 (m, 2H), 7.55-7.37 (m, 6H), 7.18-7.14 (m, 2H), 6.82-6.78 (m, 2H), 6.22 (dd,  $J = 15.8, 4.4$  Hz, 1H), 5.90 (ddd,  $J = 15.7, 9.7, 5.9$  Hz, 1H), 3.78 (s, 3H), 3.05-2.97 (m, 1H), 1.97-1.84 (m, 1H), 1.78-1.65 (m, 1H), 0.96 (t,  $J = 7.4$  Hz, 3H) ppm;  $^{13}\text{C NMR}$  (100 MHz,  $\text{CDCl}_3$ )  $\delta$  159.1, 134.4 (d,  $J = 12.3$  Hz), 132.0 (dd,  $J = 94.9, 24.1$  Hz), 131.5 (dd,  $J = 16.2, 2.7$  Hz), 131.3 (dd,  $J = 18.0, 8.6$  Hz), 129.6 (d,  $J = 2.9$  Hz), 128.4 (dd,  $J = 33.6, 11.3$  Hz), 127.3 (d,  $J = 1.0$  Hz), 122.0 (d,  $J = 7.7$  Hz), 113.8, 55.2, 46.5 (d,  $J = 69.1$  Hz), 21.0 (d,  $J = 2.6$  Hz), 12.6 (d,  $J = 13.7$  Hz) ppm;  $^{31}\text{P NMR}$  (162 MHz,  $\text{CDCl}_3$ )  $\delta$  33.91 ppm. **HRMS (ESI)** calculated  $[\text{M}+\text{H}]^+$  for  $\text{C}_{24}\text{H}_{26}\text{O}_2\text{P} = 377.1665$ , found: 377.1678.

**(*R,E*)-(1-(3-methoxyphenyl)pent-1-en-3-yl)diphenylphosphine oxide (3ca):** > 20:1 rr; white

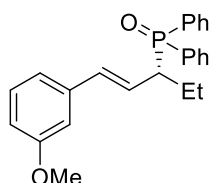

solid 65.1 mg; m.p. 110.3-113.2 °C; isolated yield 86%; 95% ee;  $[\alpha]_{\text{D}}^{25} = +138.3$  ( $c = 1.0$ ,  $\text{CHCl}_3$ ); The enantiomeric excess was determined by HPLC on Chiralpak AS-H column, hexane: isopropanol = 85:15, flow rate = 1.0 mL/min, UV detection at 254 nm,  $t_{\text{R}} = 9.1$  min (major), 12.3 min

(minor);  $^1\text{H NMR}$  (400 MHz,  $\text{CDCl}_3$ )  $\delta$  7.88-7.83 (m, 2H), 7.77-7.72 (m, 2H), 7.55-7.38 (m, 6H), 7.19-7.15 (m, 1H), 6.82-6.74 (m, 3H), 6.26 (dd,  $J = 15.9, 4.4$  Hz, 1H), 6.06 (ddd,  $J = 15.7, 9.7, 5.8$  Hz, 1H), 3.78 (s, 3H), 3.08-3.00 (m, 1H), 1.96-1.85 (m, 1H), 1.80-1.70 (m, 1H), 0.97 (t,  $J = 7.4$  Hz, 3H) ppm;  $^{13}\text{C NMR}$  (100 MHz,  $\text{CDCl}_3$ )  $\delta$  159.7, 138.2 (d,  $J = 3.2$  Hz), 134.9 (d,  $J = 12.2$  Hz), 131.9 (d,  $J = 94.9, 24.1$  Hz), 131.6 (dd,  $J = 14.1, 2.7$  Hz), 131.3 (dd,  $J = 17.0, 8.6$  Hz), 129.4, 128.4 (dd,  $J = 32.3, 11.4$  Hz), 124.8 (d,  $J = 7.4$  Hz), 118.9, 113.2, 111.3, 55.2, 46.6 (d,  $J = 68.8$  Hz), 21.0 (d,  $J = 2.7$  Hz), 12.7 (d,  $J = 13.5$  Hz) ppm;  $^{31}\text{P NMR}$  (162 MHz,  $\text{CDCl}_3$ )  $\delta$  33.76 ppm. **HRMS (ESI)** calculated  $[\text{M}+\text{H}]^+$  for  $\text{C}_{24}\text{H}_{26}\text{O}_2\text{P} = 377.1665$ , found: 377.1680.

**(*R,E*)-(1-(2-methoxyphenyl)pent-1-en-3-yl)diphenylphosphine oxide (3da):** > 20:1 rr; white

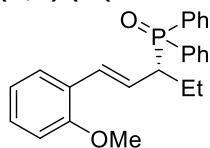

solid 60.2 mg; m.p. 154.8-158.1 °C; isolated yield 80%; 96% ee;  $[\alpha]_D^{25} = +100.8$  ( $c = 1.0$ ,  $\text{CHCl}_3$ ); The enantiomeric excess was determined by HPLC on Chiralpak AS-H column, hexane: isopropanol = 85:15, flow rate = 1.0 mL/min, UV detection at 254 nm,  $t_R = 8.4$  min (major), 11.0 min (minor);  **$^1\text{H NMR}$**  (400 MHz,  $\text{CDCl}_3$ )  $\delta$  7.89-7.83 (m, 2H), 7.80-7.75 (m, 2H), 7.53-7.37 (m, 6H), 7.27 (dd,  $J = 7.4, 1.5$  Hz, 1H), 7.19-7.15 (m, 1H), 6.86 (td,  $J = 7.5, 1.1$  Hz, 1H), 6.80 (dd,  $J = 8.2, 1.1$  Hz, 1H), 6.64 (dd,  $J = 16.0, 4.5$  Hz, 1H), 6.04 (ddd,  $J = 15.8, 9.8, 5.9$  Hz, 1H), 3.74 (s, 3H), 3.13-3.04 (m, 1H), 2.00-1.87 (m, 1H), 1.79-1.65 (m, 1H), 0.97 (t,  $J = 7.4$  Hz, 3H) ppm;  **$^{13}\text{C NMR}$**  (100 MHz,  $\text{CDCl}_3$ )  $\delta$  156.4, 132.1 (dd,  $J = 96.3, 65.3$  Hz), 131.4 (d,  $J = 16.3, 2.8$  Hz), 131.3 (dd,  $J = 26.5, 8.6$  Hz), 129.9 (d,  $J = 12.6$  Hz), 128.4, 128.3 (dd,  $J = 33.3, 11.0$  Hz), 126.6 (d,  $J = 1.9$  Hz), 125.9 (d,  $J = 2.9$  Hz), 124.8 (d,  $J = 7.2$  Hz), 120.5, 110.8, 55.4, 47.0 (d,  $J = 69.0$  Hz), 21.0 (d,  $J = 2.7$  Hz), 12.6 (d,  $J = 13.5$  Hz) ppm;  **$^{31}\text{P NMR}$**  (162 MHz,  $\text{CDCl}_3$ )  $\delta$  35.56 ppm. **HRMS (ESI)** calculated  $[\text{M}+\text{H}]^+$  for  $\text{C}_{24}\text{H}_{26}\text{O}_2\text{P} = 377.1665$ , found: 377.1680.

**(*R,E*)-(1-(4-fluorophenyl)pent-1-en-3-yl)diphenylphosphine oxide (3ea):** > 20:1 rr; white

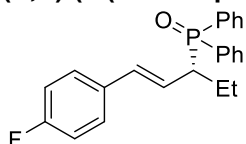

solid 62.7 mg; m.p. 162.1-164.7 °C; isolated yield 86%; 95% ee;  $[\alpha]_D^{25} = +144.6$  ( $c = 1.0$ ,  $\text{CHCl}_3$ ); The enantiomeric excess was determined by HPLC on Chiralpak AD-H column, hexane: isopropanol = 80:20, flow rate = 1.0 mL/min, UV detection at 254 nm,  $t_R = 18.4$  min (major), 20.5 min (minor);  **$^1\text{H NMR}$**  (400 MHz,  $\text{CDCl}_3$ )  $\delta$  7.88-7.83 (m, 2H), 7.77-7.72 (m, 2H), 7.56-7.37 (m, 6H), 7.20-7.16 (m, 2H), 6.97-6.92 (m, 2H), 6.24 (dd,  $J = 15.9, 4.4$  Hz, 1H), 5.98 (ddd,  $J = 15.7, 9.7, 5.8$  Hz, 1H), 3.07-2.98 (m, 1H), 1.95-1.82 (m, 1H), 1.80-1.71 (m, 1H), 0.96 (t,  $J = 7.4$  Hz, 3H) ppm;  **$^{13}\text{C NMR}$**  (100 MHz,  $\text{CDCl}_3$ )  $\delta$  162.2 (d,  $J = 246.7$  Hz), 133.8 (d,  $J = 12.1$  Hz), 132.9 (t,  $J = 3.1$  Hz), 131.9 (d,  $J = 92.9, 3.7$  Hz), 131.6 (dd,  $J = 17.8, 2.9$  Hz), 131.2 (dd,  $J = 11.8, 8.5$  Hz), 128.4 (dd,  $J = 34.1, 11.4$  Hz), 127.6 (d,  $J = 8.0$  Hz), 124.1 (dd,  $J = 7.6, 1.7$  Hz), 115.3 (d,  $J = 21.6$  Hz), 46.5 (d,  $J = 68.9$  Hz), 21.0 (d,  $J = 2.4$  Hz), 12.7 (d,  $J = 13.6$  Hz) ppm;  **$^{31}\text{P NMR}$**  (162 MHz,  $\text{CDCl}_3$ )  $\delta$  33.90 ppm;  **$^{19}\text{F NMR}$**  (376 MHz,  $\text{CDCl}_3$ )  $\delta$  -114.38 ppm. **HRMS (ESI)** calculated  $[\text{M}+\text{H}]^+$  for  $\text{C}_{23}\text{H}_{23}\text{FOP} = 365.1465$ , found: 365.1478.

**(*R,E*)-diphenyl(1-(4-(trifluoromethyl)phenyl)pent-1-en-3-yl)phosphine oxide (3fa):** > 20:1

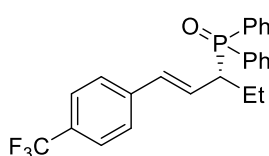

rr; white solid 60.9 mg; m.p. 178.3-181.7 °C; isolated yield 73%; 95% ee;  $[\alpha]_D^{25} = +124.9$  ( $c = 1.0$ ,  $\text{CHCl}_3$ ); The enantiomeric excess was determined by HPLC on Chiralpak AS-H column, hexane: isopropanol = 85:15, flow rate = 1.0 mL/min, UV detection at 254 nm,  $t_R = 5.5$  min (major), 7.8 min (minor);  **$^1\text{H NMR}$**  (600 MHz,  $\text{CDCl}_3$ )  $\delta$  7.87-7.84 (m, 2H), 7.76-7.72 (m, 2H), 7.57-7.54 (m, 1H), 7.53-7.50 (m, 4H), 7.47-7.45 (m, 1H), 7.43-7.40 (m, 2H), 7.30 (d,  $J = 8.1$  Hz, 2H), 6.30 (dd,  $J = 15.9, 4.3$  Hz, 1H), 6.19 (ddd,  $J = 15.7, 9.6, 5.7$  Hz, 1H), 3.10-3.04 (m, 1H), 1.94-1.86 (m, 1H), 1.84-1.75 (m, 1H), 0.97 (t,  $J = 7.4$  Hz, 3H) ppm;  **$^{13}\text{C NMR}$**  (150 MHz,  $\text{CDCl}_3$ )  $\delta$  140.1, 133.7 (d,  $J = 12.0$  Hz), 131.8 (dd,  $J = 97.5, 10.1$  Hz), 131.7 (dd,  $J = 27.2, 2.7$  Hz), 131.2 (dd,  $J = 10.6, 8.6$  Hz), 129.2 (q,  $J = 32.3$  Hz), 128.5 (dd,  $J = 50.7, 11.4$  Hz), 127.4

(d,  $J = 7.5$  Hz), 126.3 (d,  $J = 1.9$  Hz), 125.4 (q,  $J = 3.8$  Hz), 124.1 (q,  $J = 271.8$  Hz), 46.7 (d,  $J = 68.5$  Hz), 21.0 (d,  $J = 2.6$  Hz), 12.7 (d,  $J = 13.6$  Hz) ppm;  $^{31}\text{P}$  NMR (243 MHz,  $\text{CDCl}_3$ )  $\delta$  33.15 ppm;  $^{19}\text{F}$  NMR (565 MHz,  $\text{CDCl}_3$ )  $\delta$  -62.48 ppm. HRMS (ESI) calculated  $[\text{M}+\text{H}]^+$  for  $\text{C}_{24}\text{H}_{23}\text{F}_3\text{OP}$  = 415.1433, found: 415.1426.

**(*R,E*)-(1-(furan-2-yl)pent-1-en-3-yl)diphenylphosphine oxide (3ga):** > 20:1 rr; yellowish-

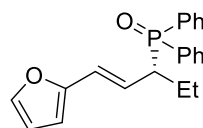

brown solid 36.9 mg; m.p. 109.2-113.7 °C; isolated yield 55%; >99% ee;  $[\alpha]_{\text{D}}^{25} = +134.5$  ( $c = 1.0$ ,  $\text{CHCl}_3$ ); The enantiomeric excess was determined by HPLC on Chiralpak AS-H column, hexane: isopropanol = 80:20, flow rate = 1.0 mL/min, UV detection at 254 nm,  $t_{\text{R}} = 7.3$  min (major), 19.2 min (minor);  $^1\text{H}$  NMR (400 MHz,  $\text{CDCl}_3$ )  $\delta$  7.86-7.73 (m, 4H), 7.55-7.40 (m, 6H), 7.28-7.26 (m, 1H), 6.31 (dd,  $J = 3.2, 1.8$  Hz, 1H), 6.13 (dd,  $J = 15.9, 4.1$  Hz, 2H), 6.00 (ddd,  $J = 15.8, 9.5, 6.0$  Hz, 1H), 3.04-2.95 (m, 1H), 1.96-1.88 (m, 1H), 1.76-1.63 (m, 1H), 0.96 (t,  $J = 7.4$  Hz, 3H) ppm;  $^{13}\text{C}$  NMR (100 MHz,  $\text{CDCl}_3$ )  $\delta$  152.3 (d,  $J = 3.8$  Hz), 141.8, 131.8 (d,  $J = 98.0, 41.1$  Hz), 131.6 (dd,  $J = 10.0, 2.6$  Hz), 131.3 (dd,  $J = 20.2, 8.6$  Hz), 128.4 (dd,  $J = 25.7, 11.4$  Hz), 123.2 (d,  $J = 12.4$  Hz), 123.0 (d,  $J = 7.8$  Hz), 111.1, 107.4 (d,  $J = 2.8$  Hz), 46.4 (d,  $J = 69.0$  Hz), 21.1 (d,  $J = 2.5$  Hz), 12.7 (d,  $J = 13.5$  Hz) ppm;  $^{31}\text{P}$  NMR (162 MHz,  $\text{CDCl}_3$ )  $\delta$  33.57 ppm. HRMS (ESI) calculated  $[\text{M}+\text{H}]^+$  for  $\text{C}_{21}\text{H}_{22}\text{O}_2\text{P}$  = 337.1352, found: 337.1365.

**(*R,E*)-(1,4-diphenylbut-3-en-2-yl)diphenylphosphine oxide (3ha):** > 20:1 rr; white solid 57.0

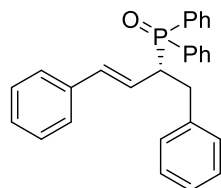

mg; m.p. 177.2-178.7 °C; isolated yield 35%; 83% ee;  $[\alpha]_{\text{D}}^{25} = +11.5$  ( $c = 1.0$ ,  $\text{CHCl}_3$ ); The enantiomeric excess was determined by HPLC on Chiralpak AD-H column, hexane: isopropanol = 80:20, flow rate = 1.0 mL/min, UV detection at 254 nm,  $t_{\text{R}} = 18.8$  min (major), 20.8 min (minor);  $^1\text{H}$  NMR (400 MHz,  $\text{CDCl}_3$ )  $\delta$  7.96-7.91 (m, 2H), 7.80-7.75 (m, 2H), 7.58-7.51 (m, 3H), 7.48-7.38 (m, 3H), 7.24-7.16 (m, 5H), 7.15-7.06 (m, 5H), 6.11 (ddd,  $J = 16.1, 9.2, 5.7$  Hz, 1H), 6.00 (dd,  $J = 15.9, 4.0$  Hz, 1H), 3.44-3.36 (m, 1H), 3.22 (ddd,  $J = 14.2, 9.6, 2.7$  Hz, 1H), 2.97 (ddd,  $J = 14.1, 11.3, 5.0$  Hz, 1H) ppm;  $^{13}\text{C}$  NMR (100 MHz,  $\text{CDCl}_3$ )  $\delta$  139.2 (d,  $J = 14.1$  Hz), 136.8 (d,  $J = 2.7$  Hz), 135.5 (d,  $J = 11.8$  Hz), 131.8 (dd,  $J = 21.4, 2.8$  Hz), 131.7 (d,  $J = 98.0, 12.0$  Hz), 131.3 (dd,  $J = 12.9, 8.7$  Hz), 128.8 (d,  $J = 11.2$  Hz), 128.7 (d,  $J = 59.7$  Hz), 128.4, 128.3, 127.4, 126.3, 126.2 (d,  $J = 1.0$  Hz), 123.8 (d,  $J = 7.5$  Hz), 46.8 (d,  $J = 67.3$  Hz), 34.2 ppm;  $^{31}\text{P}$  NMR (162 MHz,  $\text{CDCl}_3$ )  $\delta$  33.90 ppm. HRMS (ESI) calculated  $[\text{M}+\text{H}]^+$  for  $\text{C}_{28}\text{H}_{26}\text{OP}$  = 409.1716, found: 409.1725.

**ethyl (*R,E*)-5-(diphenylphosphoryl)-7-phenylhept-6-enoate (3ia):** > 20:1 rr; white solid 51.3

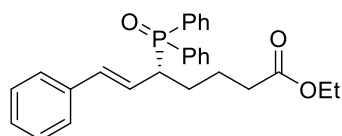

mg; m.p. 138.3-141.9 °C; isolated yield: 59%; 94% ee;  $[\alpha]_{\text{D}}^{25} = +110.7$  ( $c = 1.0$ ,  $\text{CHCl}_3$ ); The enantiomeric excess was determined by HPLC on Chiralpak AD-H column, hexane: isopropanol = 80:20, flow rate = 1.0 mL/min, UV detection at 254 nm,  $t_{\text{R}} = 21.4$  min (minor), 24.3 min (major);  $^1\text{H}$  NMR (400 MHz,  $\text{CDCl}_3$ )  $\delta$  7.88-7.83 (m, 2H), 7.76-7.71 (m, 2H), 7.54-7.46

(m, 3H), 7.45-7.37 (m, 3H), 7.26-7.19 (m, 5H), 6.28 (dd,  $J = 15.9, 4.5$  Hz, 1H), 6.06 (ddd,  $J = 15.7, 9.6, 5.6$  Hz, 1H), 4.04 (q,  $J = 7.1$  Hz, 2H), 3.21-3.12 (m, 1H), 2.28-2.24 (m, 2H), 1.87-1.77 (m, 3H), 1.64-1.55 (m, 1H), 1.17 (t,  $J = 7.1$  Hz, 3H) ppm;  $^{13}\text{C NMR}$  (100 MHz,  $\text{CDCl}_3$ )  $\delta$  173.1, 136.6 (d,  $J = 3.0$  Hz), 135.2 (d,  $J = 11.9$  Hz), 131.7 (dd,  $J = 17.4, 2.0$  Hz), 131.6 (d,  $J = 98.2, 17.4$  Hz), 131.2 (dd,  $J = 17.9, 8.5$  Hz), 128.5 (dd,  $J = 36.4, 11.4$  Hz), 128.4, 127.6, 126.2, 124.0 (d,  $J = 7.8$  Hz), 60.3, 44.6 (d,  $J = 68.8$  Hz), 33.7, 27.0, 23.3 (d,  $J = 13.5$  Hz), 14.1 ppm;  $^{31}\text{P NMR}$  (162 MHz,  $\text{CDCl}_3$ )  $\delta$  33.91 ppm. **HRMS (ESI)** calculated  $[\text{M}+\text{H}]^+$  for  $\text{C}_{27}\text{H}_{30}\text{O}_3\text{P}$  = 433.1927, found: 433.1943.

**(*R,E*)-(7-((tert-butylidimethylsilyl)oxy)-1-phenylhept-1-en-3-yl)diphenylphosphine oxide**

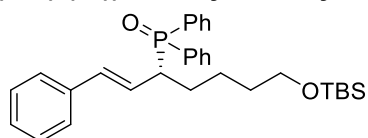

**(3ja):** > 20:1 rr; white solid 75.9 mg; m.p. 109.7-111.3 °C;

isolated yield: 75%; 94% ee;  $[\alpha]_{\text{D}}^{25} = +88.9$  ( $c = 1.0, \text{CHCl}_3$ );

The enantiomeric excess was determined by HPLC on

Chiralpak AD-H column, hexane: isopropanol = 96:4, flow rate = 0.5 mL/min, UV detection at 254 nm,  $t_{\text{R}} = 14.1$  min (major), 15.3 min (minor);  $^1\text{H NMR}$  (400 MHz,  $\text{CDCl}_3$ )  $\delta$  7.88-7.83 (m, 2H), 7.77-7.72 (m, 2H), 7.54-7.38 (m, 6H), 7.27-7.17 (m, 5H), 6.26 (dd,  $J = 15.9, 4.4$  Hz, 1H), 6.05 (ddd,  $J = 15.7, 9.7, 5.7$  Hz, 1H), 3.56-3.47 (m, 2H), 3.19-3.10 (m, 1H), 1.87-1.71 (m, 2H), 1.58-1.37 (m, 3H), 1.35-1.26 (m, 1H), 0.83 (s, 9H), -0.02 (s, 6H) ppm;  $^{13}\text{C NMR}$  (100 MHz,  $\text{CDCl}_3$ )  $\delta$  136.7 (d,  $J = 2.9$  Hz), 135.0 (d,  $J = 12.1$  Hz), 131.8 (d,  $J = 97.0, 18.0$  Hz), 131.6 (dd,  $J = 17.2, 2.8$  Hz), 131.3 (dd,  $J = 18.1, 8.6$  Hz), 128.43 (dd,  $J = 35.0, 11.4$  Hz), 128.41, 127.5, 126.2 (d,  $J = 1.8$  Hz), 124.5 (d,  $J = 7.6$  Hz), 62.7, 44.8 (d,  $J = 68.8$  Hz), 32.2, 27.2 (d,  $J = 2.5$  Hz), 25.9, 24.1 (d,  $J = 13.0$  Hz), 18.2, -5.4 ppm;  $^{31}\text{P NMR}$  (162 MHz,  $\text{CDCl}_3$ )  $\delta$  34.01 ppm. **HRMS (ESI)** calculated  $[\text{M}+\text{H}]^+$  for  $\text{C}_{31}\text{H}_{42}\text{O}_2\text{PSi}$  = 505.2686, found: 505.2701.

**(*R,E*)-diphenyl(4-phenylbut-3-en-2-yl)phosphine oxide (3ka):** > 20:1 rr; white solid 62.2 mg;

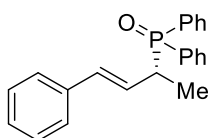

m.p. 80.1-82.5 °C; isolated yield 94%; 96% ee;  $[\alpha]_{\text{D}}^{25} = +90.0$  ( $c = 1.0,$

$\text{CHCl}_3$ ); The enantiomeric excess was determined by HPLC on Chiralpak

OJ-H column, hexane: isopropanol = 90:10, flow rate = 1.0 mL/min, UV

detection at 254 nm,  $t_{\text{R}} = 9.5$  min (major), 12.2 min (minor);  $^1\text{H NMR}$  (400 MHz,  $\text{CDCl}_3$ )  $\delta$  7.88-7.75 (m, 4H), 7.56-7.39 (m, 6H), 7.28-7.17 (m, 5H), 6.33 (dd,  $J = 15.9, 4.2$  Hz, 1H), 6.19 (ddd,  $J = 15.9, 8.2, 5.7$  Hz, 1H), 3.40-3.30 (m, 1H), 1.41 (dd,  $J = 16.0, 7.1$  Hz, 3H) ppm;  $^{13}\text{C NMR}$  (100 MHz,  $\text{CDCl}_3$ )  $\delta$  136.8 (d,  $J = 2.9$  Hz), 133.2 (d,  $J = 11.7$  Hz), 131.7 (dd,  $J = 8.7, 2.8$  Hz), 131.5 (dd,  $J = 92.8$  Hz, 43.5 Hz), 131.3 (dd,  $J = 21.8, 8.5$  Hz), 128.47 (dd,  $J = 28.0, 11.4$  Hz), 128.45, 127.5, 126.2, 125.8 (d,  $J = 7.3$  Hz), 38.5 (d,  $J = 68.8$  Hz), 13.4 (d,  $J = 3.8$  Hz) ppm;  $^{31}\text{P NMR}$  (162 MHz,  $\text{CDCl}_3$ )  $\delta$  34.83 ppm. **HRMS (ESI)** calculated  $[\text{M}+\text{H}]^+$  for  $\text{C}_{22}\text{H}_{22}\text{OP}$  = 333.1403, found: 333.1401.

**(*R,E*)-(4-(4-methoxyphenyl)but-3-en-2-yl)diphenylphosphine oxide (31a):** 18:1 rr; white

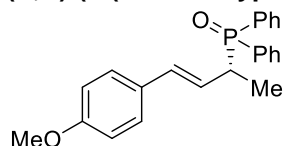

solid 60.3 mg; m.p. 137.9-141.6 °C; isolated yield 83%; > 99% ee;

$[\alpha]_D^{25} = +113.3$  (c = 1.0, CHCl<sub>3</sub>); The enantiomeric excess was

determined by HPLC on Chiralpak OJ-H column, hexane:

isopropanol = 90:10, flow rate = 1.0 mL/min, UV detection at 254 nm,  $t_R = 16.0$  min (major),

21.1 min (minor); **<sup>1</sup>H NMR** (400 MHz, CDCl<sub>3</sub>) δ 7.87-7.81 (m, 2H), 7.79-7.74 (m, 2H), 7.53-7.41

(m, 6H), 7.15 (d, *J* = 8.7 Hz, 2H), 6.79 (d, *J* = 8.7 Hz, 2H), 6.26 (dd, *J* = 15.9, 4.4 Hz, 1H), 6.03

(ddd, *J* = 15.9, 8.3, 5.8 Hz, 1H), 3.77 (s, 3H), 3.37-3.27 (m, 1H), 1.39 (dd, *J* = 16.0, 7.1 Hz, 3H)

ppm; **<sup>13</sup>C NMR** (100 MHz, CDCl<sub>3</sub>) δ 159.1, 132.5 (d, *J* = 11.6 Hz), 131.7 (dd, *J* = 96.3, 44.6 Hz),

131.6 (dd, *J* = 9.2, 2.5 Hz), 131.4 (dd, *J* = 23.4, 8.6 Hz), 129.6 (d, *J* = 2.8 Hz), 128.4 (dd, *J* =

29.1, 11.4 Hz), 127.3 (d, *J* = 0.8 Hz), 123.5 (d, *J* = 7.4 Hz), 113.9, 55.2, 38.4 (d, *J* = 69.1 Hz),

13.4 (d, *J* = 3.5 Hz) ppm; **<sup>31</sup>P NMR** (162 MHz, CDCl<sub>3</sub>) δ 34.80 ppm. **HRMS (ESI)** calculated

$[M+H]^+$  for C<sub>23</sub>H<sub>24</sub>O<sub>2</sub>P = 363.1508, found: 363.1503.

**(*R,E*)-(4-(3-methoxyphenyl)but-3-en-2-yl)diphenylphosphine oxide (3ma):** > 20:1 rr;

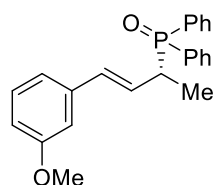

colorless oil 63.4 mg; isolated yield 88%; 94% ee;  $[\alpha]_D^{25} = +99.1$  (c = 1.0,

CHCl<sub>3</sub>); The enantiomeric excess was determined by HPLC on Chiralpak

AS-H column, hexane: isopropanol = 85:15, flow rate = 1.0 mL/min, UV

detection at 254 nm,  $t_R = 13.8$  min (major), 21.1 min (minor); **<sup>1</sup>H NMR** (400

MHz, CDCl<sub>3</sub>) δ 7.78-7.74 (m, 4H), 7.55-7.39 (m, 6H), 7.16 (td, *J* = 7.4, 1.6 Hz, 1H), 6.81 (d, *J* =

7.6 Hz, 1H), 6.76-6.74 (m, 2H), 6.30 (dd, *J* = 16.0, 4.1 Hz, 1H), 6.18 (ddd, *J* = 15.9, 8.1, 5.6 Hz,

1H), 3.76 (s, 3H), 3.39-3.29 (m, 1H), 1.40 (dd, *J* = 16.0, 7.1 Hz, 3H) ppm; **<sup>13</sup>C NMR** (100 MHz,

CDCl<sub>3</sub>) δ 159.6, 138.2 (d, *J* = 2.9 Hz), 133.0 (d, *J* = 11.6 Hz), 131.7 (dd, *J* = 8.8, 2.7 Hz), 131.5

(dd, *J* = 96.5, 40.4 Hz), 131.3 (dd, *J* = 21.6, 8.7 Hz), 129.4, 128.4 (dd, *J* = 28.1, 11.4 Hz), 126.1

(d, *J* = 7.3 Hz), 118.8, 113.2, 111.3 (d, *J* = 0.8 Hz), 55.1, 38.4 (d, *J* = 68.8 Hz), 13.3 (d, *J* = 3.5

Hz) ppm; **<sup>31</sup>P NMR** (162 MHz, CDCl<sub>3</sub>) δ 34.72 ppm. **HRMS (ESI)** calculated  $[M+H]^+$  for

C<sub>23</sub>H<sub>24</sub>O<sub>2</sub>P = 363.1508, found: 363.1506.

**(*R,E*)-(4-(2-methoxyphenyl)but-3-en-2-yl)diphenylphosphine oxide (3na):** > 20:1 rr; white

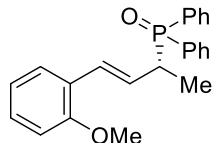

solid 70.7 mg; m.p. 96.2-98.4 °C; isolated yield 98%; 95% ee;  $[\alpha]_D^{25} =$

+81.1 (c = 1.0, CHCl<sub>3</sub>); The enantiomeric excess was determined by

HPLC on Chiralpak AS-H column, hexane: isopropanol = 85:15, flow rate

= 1.0 mL/min, UV detection at 254 nm,  $t_R = 14.3$  min (major), 22.0 min (minor); **<sup>1</sup>H NMR** (400

MHz, CDCl<sub>3</sub>) δ 7.87-7.77 (m, 4H), 7.54-7.39 (m, 6H), 7.26-7.24 (m, 1H), 7.19-7.15 (m, 1H),

6.87-6.84 (m, 1H), 6.80 (d, *J* = 8.2 Hz, 1H), 6.67 (dd, *J* = 16.0, 4.5 Hz, 1H), 6.18 (ddd, *J* = 16.1,

8.4, 5.8 Hz, 1H), 3.75 (s, 3H), 3.43-3.33 (m, 1H), 1.41 (dd, *J* = 16.0, 7.1 Hz, 3H) ppm; **<sup>13</sup>C NMR**

(100 MHz, CDCl<sub>3</sub>) δ 156.4, 131.7 (dd, *J* = 96.3, 65.3 Hz), 131.6 (dd, *J* = 9.4, 3.6 Hz), 131.4 (dd,

*J* = 31.2, 8.5 Hz), 128.5, 128.4 (dd, *J* = 29.4, 11.1 Hz), 128.1 (d, *J* = 11.9 Hz), 126.7 (d, *J* = 1.0

Hz), 126.4 (d, *J* = 7.1 Hz), 125.9 (d, *J* = 3.0 Hz), 120.6, 110.7, 55.3, 39.0 (d, *J* = 68.9 Hz), 13.4

(d,  $J = 3.7$  Hz) ppm;  $^{31}\text{P}$  NMR (162 MHz,  $\text{CDCl}_3$ )  $\delta$  34.79 ppm. **HRMS (ESI)** calculated  $[\text{M}+\text{H}]^+$  for  $\text{C}_{23}\text{H}_{24}\text{O}_2\text{P} = 363.1508$ , found: 363.1502.

**(*R,E*)-(4-(4-fluorophenyl)but-3-en-2-yl)diphenylphosphine oxide (30a):** > 20:1 rr; colorless

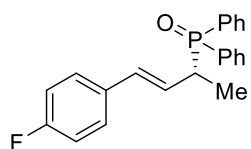

oil 56.7 mg; isolated yield 81%; 94% ee;  $[\alpha]_{\text{D}}^{25} = +75.2$  ( $c = 1.0$ ,  $\text{CHCl}_3$ ); The enantiomeric excess was determined by HPLC on Chiralpak AD-H column, hexane: isopropanol = 80:20, flow rate = 1.0 mL/min, UV detection at 254 nm,  $t_{\text{R}} = 17.3$  min (minor), 22.3 min (major);  $^1\text{H}$  NMR (400 MHz,  $\text{CDCl}_3$ )  $\delta$  7.87-7.82 (m, 2H), 7.79-7.74 (m, 2H), 7.56-7.40 (m, 6H), 7.19-7.14 (m, 2H), 6.96-6.90 (m, 2H), 6.28 (dd,  $J = 15.9, 4.3$  Hz, 1H), 6.10 (ddd,  $J = 15.9, 8.3, 5.7$  Hz, 1H), 3.38-3.28 (m, 1H), 1.40 (dd,  $J = 16.0, 7.1$  Hz, 3H) ppm;  $^{13}\text{C}$  NMR (100 MHz,  $\text{CDCl}_3$ )  $\delta$  162.1 (d,  $J = 246.9$  Hz), 132.9 (t,  $J = 3.2$  Hz), 131.9 (d,  $J = 11.5$  Hz), 131.7 (dd,  $J = 10.6, 2.6$  Hz), 131.5 (dd,  $J = 96.7, 19.1$  Hz), 131.2 (dd,  $J = 15.9, 8.6$  Hz), 128.5 (dd,  $J = 28.0, 11.4$  Hz), 127.6 (dd,  $J = 8.0, 1.3$  Hz), 125.5 (dd,  $J = 7.4, 2.3$  Hz), 115.3 (d,  $J = 21.6$  Hz), 38.3 (d,  $J = 68.8$  Hz), 13.3 (d,  $J = 3.5$  Hz) ppm;  $^{31}\text{P}$  NMR (162 MHz,  $\text{CDCl}_3$ )  $\delta$  34.67 ppm;  $^{19}\text{F}$  NMR (376 MHz,  $\text{CDCl}_3$ )  $\delta$  -114.36 ppm. **HRMS (ESI)** calculated  $[\text{M}+\text{H}]^+$  for  $\text{C}_{22}\text{H}_{21}\text{FOP} = 351.1309$ , found: 351.1039.

**(*R,E*)-diphenyl(4-(4-(trifluoromethyl)phenyl)but-3-en-2-yl)phosphine oxide (3pa):** > 20:1 rr;

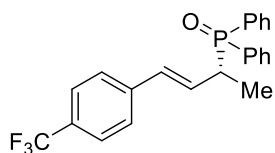

white solid 60.9 mg; m.p. 135.0-137.1 °C; isolated yield 76%; 94% ee;  $[\alpha]_{\text{D}}^{25} = +98.6$  ( $c = 1.0$ ,  $\text{CHCl}_3$ ); The enantiomeric excess was determined by HPLC on Chiralpak AS-H column, hexane: isopropanol = 85:15, flow rate = 1.0 mL/min, UV detection at 254 nm,  $t_{\text{R}} = 6.8$  min (major), 8.2 min (minor);  $^1\text{H}$  NMR (400 MHz,  $\text{CDCl}_3$ )  $\delta$  7.88-7.83 (m, 2H), 7.79-7.74 (m, 2H), 7.58-7.47 (m, 6H), 7.46-7.41 (m, 2H), 7.30 (d,  $J = 8.1$  Hz, 2H), 6.38-6.26 (m, 2H), 3.42-3.32 (m, 1H), 1.42 (dd,  $J = 15.9, 7.1$  Hz, 3H) ppm;  $^{13}\text{C}$  NMR (150 MHz,  $\text{CDCl}_3$ )  $\delta$  140.1, 131.82, 131.81 (dd,  $J = 16.0, 2.7$  Hz), 131.4 (d,  $J = 97.5$  Hz), 131.2 (dd,  $J = 16.3, 8.7$  Hz), 129.2 (q,  $J = 32.2$  Hz), 128.8, 128.5 (dd,  $J = 40.6, 11.5$  Hz), 126.3 (d,  $J = 1.7$  Hz), 125.4 (q,  $J = 3.8$  Hz), 124.1 (q,  $J = 271.7$  Hz), 38.6 (d,  $J = 68.2$  Hz), 13.2 (d,  $J = 3.4$  Hz) ppm;  $^{31}\text{P}$  NMR (162 MHz,  $\text{CDCl}_3$ )  $\delta$  34.36 ppm;  $^{19}\text{F}$  NMR (565 MHz,  $\text{CDCl}_3$ )  $\delta$  -62.48 ppm. **HRMS (ESI)** calculated  $[\text{M}+\text{H}]^+$  for  $\text{C}_{23}\text{H}_{21}\text{F}_3\text{OP} = 401.1277$ , found: 401.1271.

**(*R,E*)-(4-(furan-2-yl)but-3-en-2-yl)diphenylphosphine oxide (3qa):** > 20:1 rr; yellowish-

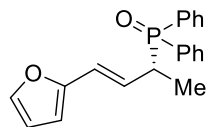

brown solid 31.4 mg; m.p. 91.2-93.6 °C; isolated yield 49%; 93% ee;  $[\alpha]_{\text{D}}^{25} = +52.8$  ( $c = 1.0$ ,  $\text{CHCl}_3$ ); The enantiomeric excess was determined by HPLC on Chiralpak AS-H column, hexane: isopropanol = 80:20, flow rate = 1.0 mL/min, UV detection at 254 nm,  $t_{\text{R}} = 11.5$  min (major), 26.1 min (minor);  $^1\text{H}$  NMR (400 MHz,  $\text{CDCl}_3$ )  $\delta$  7.85-7.75 (m, 4H), 7.56-7.42 (m, 6H), 7.27-7.26 (m, 1H), 6.31 (dd,  $J = 3.1, 1.8$  Hz, 1H), 6.21-6.09 (m, 3H), 3.37-3.27 (m, 1H), 1.38 (dd,  $J = 15.9, 7.1$  Hz, 3H) ppm;  $^{13}\text{C}$  NMR (100 MHz,  $\text{CDCl}_3$ )  $\delta$  152.4 (d,  $J = 3.9$  Hz), 141.9, 131.7 (t,  $J = 3.3$  Hz), 131.5 (dd,  $J = 95.7, 67.5$  Hz), 131.4 (dd,  $J = 26.6, 8.6$  Hz), 128.5 (dd,  $J = 22.6, 11.4$  Hz), 124.3 (d,  $J = 7.5$  Hz), 121.4 (d,  $J = 11.8$  Hz), 111.2, 107.6 (d,  $J = 2.5$  Hz), 38.1 (d,  $J = 68.8$  Hz), 13.1 (d,  $J = 3.4$  Hz) ppm;  $^{31}\text{P}$  NMR

(162 MHz, CDCl<sub>3</sub>)  $\delta$  34.35 ppm. **HRMS (ESI)** calculated [M+H]<sup>+</sup> for C<sub>20</sub>H<sub>20</sub>O<sub>2</sub>P = 323.1195, found: 323.1189.

**(R,E)-(3-methyl-4-phenylbut-3-en-2-yl)diphenylphosphine oxide (3ra):** > 20:1 rr; white solid

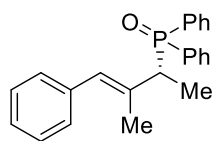

24.3 mg; m.p. 133.0-134.6 °C; isolated yield 35%; 96% ee;  $[\alpha]_D^{25} = +129.6$  (c = 1.0, CHCl<sub>3</sub>); The enantiomeric excess was determined by HPLC on Chiralpak AD-H column, hexane: isopropanol = 80:20, flow rate = 1.0 mL/min, UV detection at 254 nm,  $t_R = 10.8$  min (major), 14.1 min (minor); **<sup>1</sup>H NMR** (400 MHz, CDCl<sub>3</sub>)  $\delta$  7.94-7.89 (m, 2H), 7.80-7.75 (m, 2H), 7.55-7.50 (m, 3H), 7.48-7.38 (m, 3H), 7.27-7.23 (m, 2H), 7.17-7.14 (m, 1H), 6.96 (d,  $J = 7.4$  Hz, 2H), 6.27 (d,  $J = 3.5$  Hz, 1H), 3.24-3.17 (m, 1H), 1.86-1.85 (m, 3H), 1.46 (dd,  $J = 16.3, 7.3$  Hz, 3H) ppm; **<sup>13</sup>C NMR** (100 MHz, CDCl<sub>3</sub>)  $\delta$  137.6 (d,  $J = 2.3$  Hz), 135.4 (d,  $J = 7.4$  Hz), 132.4 (d,  $J = 97.8, 29.7$  Hz), 131.5 (dd,  $J = 23.4, 2.6$  Hz), 131.2 (d,  $J = 8.4$  Hz), 129.7 (d,  $J = 10.4$  Hz), 128.7 (d,  $J = 2.2$  Hz), 128.4 (d,  $J = 48.1, 11.5$  Hz), 127.9, 126.22, 44.2 (d,  $J = 66.9$  Hz), 17.0 (d,  $J = 2.6$  Hz), 13.1 (d,  $J = 3.4$  Hz) ppm; **<sup>31</sup>P NMR** (162 MHz, CDCl<sub>3</sub>)  $\delta$  34.27 ppm. **HRMS (ESI)** calculated [M+H]<sup>+</sup> for C<sub>23</sub>H<sub>24</sub>OP = 347.1559, found: 347.1568.

**(R,E)-(1-phenylpent-1-en-3-yl)di-p-tolylphosphine oxide (3ab):** > 20:1 rr; white solid 72.4

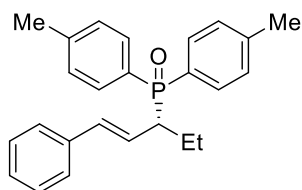

mg; m.p. 167.9-169.1 °C; isolated yield: 97%; 94% ee;  $[\alpha]_D^{25} = +157.1$  (c = 1.0, CHCl<sub>3</sub>); The enantiomeric excess was determined by HPLC on Chiralpak OD-H column, hexane: isopropanol = 95:5, flow rate = 1.0 mL/min, UV detection at 254 nm,  $t_R = 10.9$  min (major), 12.6 min (minor); **<sup>1</sup>H NMR** (600 MHz, CDCl<sub>3</sub>)  $\delta$  7.71 (dd,  $J = 10.7, 8.0$  Hz, 2H), 7.62 (dd,  $J = 10.7, 8.0$  Hz, 2H), 7.29-7.18 (m, 9H), 6.30 (dd,  $J = 15.9, 4.3$  Hz, 1H), 6.06 (ddd,  $J = 15.8, 9.7, 5.9$  Hz, 1H), 3.03-2.97 (m, 1H), 2.39 (s, 3H), 2.34 (s, 3H), 1.95-1.87 (m, 1H), 1.74-1.66 (m, 1H), 0.95 (t,  $J = 7.4$  Hz, 3H) ppm; **<sup>13</sup>C NMR** (150 MHz, CDCl<sub>3</sub>)  $\delta$  141.9 (dd,  $J = 25.6, 2.7$  Hz), 136.9 (d,  $J = 2.7$  Hz), 134.8 (d,  $J = 12.1$  Hz), 131.3 (dd,  $J = 29.2, 8.9$  Hz), 129.1 (dd,  $J = 43.4, 11.7$  Hz), 128.8 (dd,  $J = 98.2, 48.3$  Hz), 128.4, 127.4, 126.2 (d,  $J = 1.7$  Hz), 124.8 (d,  $J = 7.1$  Hz), 46.7 (d,  $J = 69.2$  Hz), 21.5 (d,  $J = 5.9$  Hz), 21.0 (d,  $J = 2.6$  Hz), 12.7 (d,  $J = 13.6$  Hz) ppm; **<sup>31</sup>P NMR** (243 MHz, CDCl<sub>3</sub>)  $\delta$  33.44 ppm. **HRMS (ESI)** calculated [M+H]<sup>+</sup> for C<sub>25</sub>H<sub>28</sub>OP = 375.1872, found: 375.1887.

**(R,E)-bis(4-methoxyphenyl)(1-phenylpent-1-en-3-yl)phosphine oxide (3ac):** > 20:1 rr;

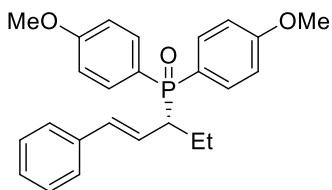

white solid 59.9 mg; m.p. 141.6-143.9 °C; isolated yield: 74%; 96% ee;  $[\alpha]_D^{25} = +123.6$  (c = 1.0, CHCl<sub>3</sub>); The enantiomeric excess was determined by HPLC on Chiralpak OD-H column, hexane: isopropanol = 90:10, flow rate = 1.0 mL/min, UV detection at 254 nm,  $t_R = 12.7$  min (major), 14.9 min (minor); **<sup>1</sup>H NMR** (600 MHz, CDCl<sub>3</sub>)  $\delta$  7.77-7.72 (m, 2H), 7.67-7.63 (m, 2H), 7.28-7.24 (m, 4H), 7.21-7.18 (m, 1H), 7.00-6.97 (m, 2H), 6.92-

6.90 (m, 2H), 6.29 (dd,  $J = 15.9, 4.4$  Hz, 1H), 6.04 (ddd,  $J = 15.7, 9.7, 5.9$  Hz, 1H), 3.84 (s, 3H), 3.79 (s, 3H), 3.00-2.94 (m, 1H), 1.97-1.89 (m, 1H), 1.73-1.64 (m, 1H), 0.95 (t,  $J = 7.4$  Hz, 3H) ppm;  $^{13}\text{C NMR}$  (150 MHz,  $\text{CDCl}_3$ )  $\delta$  162.1 (dd,  $J = 20.3, 2.9$  Hz), 136.9 (d,  $J = 2.8$  Hz), 134.7 (d,  $J = 12.4$  Hz), 133.1 (dd,  $J = 34.0, 9.8$  Hz), 128.4, 127.4, 126.2 (d,  $J = 1.7$  Hz), 125.0 (d,  $J = 7.1$  Hz), 123.3 (dd,  $J = 101.2, 36.2$  Hz), 113.9 (dd,  $J = 45.1, 12.4$  Hz), 55.2 (d,  $J = 9.3$  Hz), 47.1 (d,  $J = 69.8$  Hz), 21.0 (d,  $J = 2.5$  Hz), 12.7 (d,  $J = 13.4$  Hz) ppm;  $^{31}\text{P NMR}$  (243 MHz,  $\text{CDCl}_3$ )  $\delta$  33.35 ppm. **HRMS (ESI)** calculated  $[\text{M}+\text{H}]^+$  for  $\text{C}_{25}\text{H}_{28}\text{O}_3\text{P} = 407.1771$ , found: 407.1768.

**(*R,E*)-bis(3-methoxyphenyl)(1-phenylpent-1-en-3-yl)phosphine oxide (3ad):** > 20:1 rr;

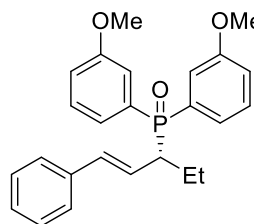

colorless oil 63.4 mg; isolated yield: 78%; 96% ee;  $[\alpha]_{\text{D}}^{25} = +116.1$  ( $c = 1.0$ ,  $\text{CHCl}_3$ ); The enantiomeric excess was determined by HPLC on Chiralpak OD-H column, hexane: isopropanol = 95:5, flow rate = 0.5 mL/min, UV detection at 254 nm,  $t_{\text{R}} = 27.0$  min (major), 30.4 min (minor);  $^1\text{H NMR}$  (400 MHz,  $\text{CDCl}_3$ )  $\delta$  7.46-7.17 (m, 11H), 7.07-7.04 (m, 1H), 6.98-6.95 (m, 1H), 6.30 (dd,  $J = 15.9, 4.4$  Hz, 1H), 6.10 (ddd,  $J = 15.7, 9.7, 5.8$  Hz, 1H), 3.82 (s, 3H), 3.71 (s, 3H), 3.04-2.96 (m, 1H), 1.96-1.83 (m, 1H), 1.81-1.70 (m, 1H), 0.97 (t,  $J = 7.4$  Hz, 3H) ppm;  $^{13}\text{C NMR}$  (100 MHz,  $\text{CDCl}_3$ )  $\delta$  159.5 (dd,  $J = 32.2, 13.9$  Hz), 136.7 (d,  $J = 2.9$  Hz), 135.0 (d,  $J = 12.1$  Hz), 133.3 (dd,  $J = 94.9, 5.6$  Hz), 129.5 (dd,  $J = 34.8, 13.6$  Hz), 128.4, 127.5, 126.1 (d,  $J = 1.8$  Hz), 124.4 (d,  $J = 7.6$  Hz), 123.1 (dd,  $J = 20.5, 8.9$  Hz), 117.9 (dd,  $J = 6.7, 2.7$  Hz), 116.2 (d,  $J = 9.2$  Hz), 55.3 (d,  $J = 13.6$  Hz), 46.6 (d,  $J = 68.9$  Hz), 21.0 (d,  $J = 2.6$  Hz), 12.7 (d,  $J = 13.7$  Hz) ppm;  $^{31}\text{P NMR}$  (162 MHz,  $\text{CDCl}_3$ )  $\delta$  34.15 ppm. **HRMS (ESI)** calculated  $[\text{M}+\text{H}]^+$  for  $\text{C}_{25}\text{H}_{28}\text{O}_3\text{P} = 407.1771$ , found: 407.1769.

**(*R,E*)-bis(2-methoxyphenyl)(1-phenylpent-1-en-3-yl)phosphine oxide (3ae):** > 20:1 rr;

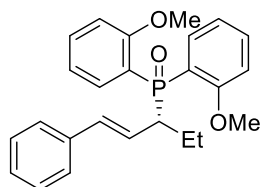

white solid 54.0 mg; m.p. 145.7-149.3 °C; isolated yield: 66%; 95% ee;  $[\alpha]_{\text{D}}^{25} = +150.8$  ( $c = 1.0$ ,  $\text{CHCl}_3$ ); The enantiomeric excess was determined by HPLC on Chiralpak AD-H column, hexane: isopropanol = 80:20, flow rate = 1.0 mL/min, UV detection at 254 nm,  $t_{\text{R}} = 26.7$  min (major), 40.4 min (minor);  $^1\text{H NMR}$  (600 MHz,  $\text{CDCl}_3$ )  $\delta$  7.85 (ddd,  $J = 12.7, 7.6, 1.8$  Hz, 1H), 7.75 (ddd,  $J = 12.8, 7.6, 1.8$  Hz, 1H), 7.45-7.42 (m, 1H), 7.39-7.36 (m, 1H), 7.23-7.19 (m, 4H), 7.16-7.13 (m, 1H), 7.03-6.97 (m, 2H), 6.88 (dd,  $J = 8.1, 5.1$  Hz, 1H), 6.78 (dd,  $J = 8.1, 5.2$  Hz, 1H), 6.40 (dd,  $J = 15.8, 4.6$  Hz, 1H), 6.17 (ddd,  $J = 15.8, 10.0, 7.0$  Hz, 1H), 3.78 (s, 3H), 3.66 (s, 3H), 3.56-3.48 (m, 1H), 1.95-1.87 (m, 1H), 1.77-1.68 (m, 1H), 0.99 (t,  $J = 7.4$  Hz, 3H) ppm;  $^{13}\text{C NMR}$  (150 MHz,  $\text{CDCl}_3$ )  $\delta$  160.1 (dd,  $J = 26.7, 3.4$  Hz), 137.4 (d,  $J = 2.8$  Hz), 134.2 (dd,  $J = 6.0, 2.8$  Hz), 133.3 (d,  $J = 13.6$  Hz), 133.0 (d,  $J = 2.1$  Hz), 128.3, 127.0, 126.6 (d,  $J = 7.3$  Hz), 126.1 (d,  $J = 1.8$  Hz), 121.1 (dd,  $J = 96.6, 14.3$  Hz), 120.6 (dd,  $J = 15.9, 10.9$  Hz), 110.6 (dd,  $J = 39.2, 6.6$  Hz), 55.2 (d,  $J = 20.0$  Hz), 46.6 (d,  $J = 72.5$  Hz), 21.8 (d,  $J = 2.5$  Hz), 12.9 (d,  $J = 14.8$  Hz) ppm;  $^{31}\text{P NMR}$  (243 MHz,  $\text{CDCl}_3$ )  $\delta$  35.46 ppm. **HRMS (ESI)** calculated  $[\text{M}+\text{H}]^+$  for  $\text{C}_{25}\text{H}_{28}\text{O}_3\text{P} = 407.1771$ , found: 407.1770.



**(*R,E*)-bis(4-chlorophenyl)(1-phenylpent-1-en-3-yl)phosphine oxide (3af):** > 20:1 rr; white

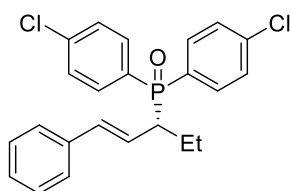

solid 22.3 mg; m.p. 134.6-136.9 °C; isolated yield: 27%; > 99% ee;

$[\alpha]_D^{25} = +135.5$  ( $c = 1.0$ ,  $\text{CHCl}_3$ ); The enantiomeric excess was

determined by HPLC on Chiralpak OD-H column, hexane:

isopropanol = 90:10, flow rate = 1.0 mL/min, UV detection at 254

nm,  $t_R = 7.0$  min (major), 8.3 min (minor); **<sup>1</sup>H NMR** (400 MHz,  $\text{CDCl}_3$ )  $\delta$  7.79-7.73 (m, 2H), 7.69-

7.63 (m, 2H), 7.51-7.47 (m, 2H), 7.42-7.38 (m, 2H), 7.31-7.27 (m, 2H), 7.25-7.22 (m, 3H), 6.31

(dd,  $J = 15.9, 4.5$  Hz, 1H), 6.03 (ddd,  $J = 15.9, 9.8, 6.0$  Hz, 1H), 3.04-2.95 (m, 1H), 1.90-1.83

(m, 1H), 1.77-1.68 (m, 1H), 0.97 (t,  $J = 7.4$  Hz, 3H) ppm; **<sup>13</sup>C NMR** (150 MHz,  $\text{CDCl}_3$ )  $\delta$  138.5

(dd,  $J = 26.7, 3.3$  Hz), 136.4 (d,  $J = 2.8$  Hz), 135.6 (d,  $J = 12.5$  Hz), 132.6 (dd,  $J = 24.5, 9.3$  Hz),

130.2 (d,  $J = 95.4, 33.2$  Hz), 129.0 (dd,  $J = 47.5, 11.9$  Hz), 128.6, 127.8, 126.2, 123.7 (d,  $J =$

7.6 Hz), 46.6 (d,  $J = 69.8$  Hz), 21.0 (d,  $J = 2.6$  Hz), 12.6 (d,  $J = 13.7$  Hz) ppm; **<sup>31</sup>P NMR** (162

MHz,  $\text{CDCl}_3$ )  $\delta$  32.60 ppm. **HRMS (ESI)** calculated  $[M+H]^+$  for  $\text{C}_{23}\text{H}_{22}\text{Cl}_2\text{OP} = 415.0780$ , found:

415.0796.

**(*R,E*)-(1-phenylpent-1-en-3-yl)bis(4-(trifluoromethyl)phenyl)phosphine oxide (3ag):** >

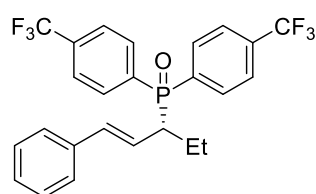

20:1 rr; white solid 29.6 mg; m.p. 149.9-151.7 °C; isolated yield

28%; 92% ee;  $[\alpha]_D^{25} = +81.4$  ( $c = 1.0$ ,  $\text{CHCl}_3$ ); The enantiomeric

excess was determined by HPLC on Chiralpak AD-H column,

hexane: isopropanol = 85:15, flow rate = 1.0 mL/min, UV

detection at 254 nm,  $t_R = 12.6$  min (minor), 13.5 min (major); **<sup>1</sup>H**

**NMR** (600 MHz,  $\text{CDCl}_3$ )  $\delta$  8.00 (dd,  $J = 10.4, 8.1$  Hz, 2H), 7.90 (dd,  $J = 10.5, 8.1$  Hz, 2H), 7.78

(dd,  $J = 8.3, 2.4$  Hz, 2H), 7.69 (dd,  $J = 8.3, 2.4$  Hz, 2H), 7.30-7.26 (m, 2H), 7.24-7.22 (m, 3H),

6.35 (dd,  $J = 15.9, 4.5$  Hz, 1H), 6.07 (ddd,  $J = 15.8, 9.8, 6.0$  Hz, 1H), 3.14-3.08 (m, 1H), 1.90-

1.76 (m, 2H), 1.00 (t,  $J = 7.4$  Hz, 3H) ppm; **<sup>13</sup>C NMR** (150 MHz,  $\text{CDCl}_3$ )  $\delta$  136.2 (d,  $J = 3.1$  Hz),

136.1 (d,  $J = 12.5$  Hz), 135.8 (dd,  $J = 93.0, 34.7$  Hz), 133.7 (ddq,  $J = 33.2, 30.5, 2.8$  Hz), 131.7

(dd,  $J = 17.1, 8.9$  Hz), 128.6, 127.9, 126.2 (d,  $J = 1.7$  Hz), 125.5 (ddq,  $J = 47.2, 11.4, 3.7$  Hz),

123.6 (dq,  $J = 272.8, 3.5$  Hz), 122.9 (d,  $J = 7.7$  Hz), 46.2 (d,  $J = 69.7$  Hz), 21.0 (d,  $J = 2.7$  Hz),

12.5 (d,  $J = 13.8$  Hz) ppm; **<sup>31</sup>P NMR** (243 MHz,  $\text{CDCl}_3$ )  $\delta$  31.06 ppm; **<sup>19</sup>F NMR** (565 MHz,  $\text{CDCl}_3$ )

$\delta$  -63.19, -63.20 ppm. **HRMS (ESI)** calculated  $[M+H]^+$  for  $\text{C}_{25}\text{H}_{22}\text{F}_6\text{OP} = 483.1307$ , found:

483.1307.

**(*R,E*)-di(naphthalen-2-yl)(1-phenylpent-1-en-3-yl)phosphine oxide (3ah):** > 20:1 rr; white

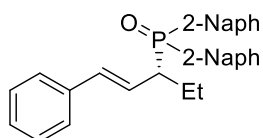

solid 56.0 mg; m.p. 184.8-185.9 °C; isolated yield: 63%; 94% ee;

$[\alpha]_D^{25} = +153.7$  ( $c = 1.0$ ,  $\text{CHCl}_3$ ); The enantiomeric excess was

determined by HPLC on Chiralpak OD-H column, hexane: isopropanol

= 90:10, flow rate = 1.0 mL/min, UV detection at 254 nm,  $t_R = 11.0$  min (major), 12.4 min (minor);

**<sup>1</sup>H NMR** (400 MHz,  $\text{CDCl}_3$ )  $\delta$  8.49 (dd,  $J = 40.8, 12.9$  Hz, 2H), 7.96-7.92 (m, 2H), 7.88-7.75 (m,

6H), 7.60-7.47 (m, 4H), 7.22-7.14 (m, 5H), 6.41 (dd,  $J = 15.9, 4.3$  Hz, 1H), 6.17 (ddd,  $J = 15.8,$

9.7, 5.9 Hz, 1H), 3.32-3.24 (m, 1H), 2.05-1.93 (m, 1H), 1.89-1.76 (m, 1H), 0.99 (t,  $J = 7.4$  Hz,

3H) ppm; **<sup>13</sup>C NMR** (100 MHz,  $\text{CDCl}_3$ )  $\delta$  136.7 (d,  $J = 2.8$  Hz), 135.2 (d,  $J = 12.3$  Hz), 134.5 (dd,

$J = 8.1, 2.5$  Hz), 133.5 (dd,  $J = 13.8, 7.5$  Hz), 132.5 (dd,  $J = 14.9, 12.5$  Hz), 129.0 (dd,  $J = 121.2, 23.6$  Hz), 128.9 (d,  $J = 3.2$  Hz), 128.4, 128.3, 128.1, 128.0 (d,  $J = 11.2$  Hz), 127.7 (dd,  $J = 29.1, 21.9$  Hz), 126.8 (d,  $J = 18.2$  Hz), 126.2 (dd,  $J = 5.1, 4.0$  Hz), 125.8 (d,  $J = 9.9$  Hz), 124.5 (d,  $J = 7.4$  Hz), 46.5 (d,  $J = 69.1$  Hz), 21.1 (d,  $J = 1.9$  Hz), 12.7 (d,  $J = 13.8$  Hz) ppm;  $^{31}\text{P NMR}$  (162 MHz,  $\text{CDCl}_3$ )  $\delta$  33.99 ppm. **HRMS (ESI)** calculated  $[\text{M}+\text{H}]^+$  for  $\text{C}_{31}\text{H}_{28}\text{OP} = 447.1872$ , found: 447.1890.

**(*R,E*)-di(naphthalen-1-yl)(1-phenylpent-1-en-3-yl)phosphine oxide (3ai):** > 20:1 rr; white

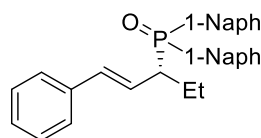

solid 35.7 mg; m.p. 181.6-184.9 °C; isolated yield: 40%; 93% ee;  $[\alpha]_{\text{D}}^{25} = +78.1$  ( $c = 1.0, \text{CHCl}_3$ ); The enantiomeric excess was determined by HPLC on Chiralpak OD-H column, hexane: isopropanol = 85:15, flow rate = 1.0 mL/min, UV detection at 254 nm,  $t_{\text{R}} = 10.2$  min (major), 18.0 min (minor);  $^1\text{H NMR}$  (400 MHz,  $\text{CDCl}_3$ )  $\delta$  8.79 (d,  $J = 8.4$  Hz, 2H), 8.04-7.93 (m, 3H), 7.90 (d,  $J = 8.2$  Hz, 1H), 7.86-7.84 (m, 1H), 7.78-7.75 (m, 1H), 7.54-7.49 (m, 1H), 7.48-7.35 (m, 5H), 7.20-7.12 (m, 3H), 7.07-7.05 (m, 2H), 6.30 (dd,  $J = 15.9, 4.0$  Hz, 1H), 6.14 (ddd,  $J = 15.9, 9.6, 6.3$  Hz, 1H), 3.53-3.45 (m, 1H), 2.18-2.06 (m, 1H), 1.95-1.85 (m, 1H), 1.01 (t,  $J = 7.3$  Hz, 3H) ppm;  $^{13}\text{C NMR}$  (100 MHz,  $\text{CDCl}_3$ )  $\delta$  136.8 (d,  $J = 2.5$  Hz), 134.5 (d,  $J = 12.9$  Hz), 134.0 (d,  $J = 8.5$  Hz), 133.8 (dd,  $J = 12.1, 8.9$  Hz), 132.8 (dd,  $J = 14.9, 2.9$  Hz), 131.7 (dd,  $J = 25.2, 9.8$  Hz), 129.3 (dd,  $J = 94.9, 5.6$  Hz), 128.8 (d,  $J = 14.3$  Hz), 128.3, 127.3 (d,  $J = 6.0$  Hz), 127.0, 126.9 (d,  $J = 4.6$  Hz), 126.3, 126.1, 125.3 (d,  $J = 6.7$  Hz), 124.2 (dd,  $J = 13.4, 10.6$  Hz), 47.1 (d,  $J = 70.0$  Hz), 21.8 (d,  $J = 1.8$  Hz), 12.7 (d,  $J = 13.7$  Hz) ppm;  $^{31}\text{P NMR}$  (162 MHz,  $\text{CDCl}_3$ )  $\delta$  39.16 ppm. **HRMS (ESI)** calculated  $[\text{M}+\text{H}]^+$  for  $\text{C}_{31}\text{H}_{28}\text{OP} = 447.1872$ , found: 447.1868.

**(*R,E*)-dibenzyl(1-phenylpent-1-en-3-yl)phosphine oxide (3aj):** > 20:1 rr; white solid 37.4 mg;

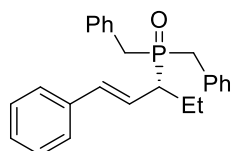

m.p. 124.2-128.3 °C; isolated yield: 50%; 94% ee;  $[\alpha]_{\text{D}}^{25} = +140.1$  ( $c = 1.0, \text{CHCl}_3$ ); The enantiomeric excess was determined by HPLC on Chiralpak AS-H column, hexane: isopropanol = 85:15, flow rate = 1.0 mL/min, UV detection at 254 nm,  $t_{\text{R}} = 10.5$  min (major), 12.0 min (minor);  $^1\text{H NMR}$  (400 MHz,  $\text{CDCl}_3$ )  $\delta$  7.35-7.27 (m, 15H), 6.38 (dd,  $J = 15.8, 4.5$  Hz, 1H), 5.93 (ddd,  $J = 15.5, 9.9, 5.0$  Hz, 1H), 3.25-3.16 (m, 1H), 3.13-3.07 (m, 2H), 3.04-3.01 (m, 1H), 2.52-2.43 (m, 1H), 2.09-1.97 (m, 1H), 1.52-1.39 (m, 1H), 0.88 (t,  $J = 7.3$  Hz, 3H) ppm;  $^{13}\text{C NMR}$  (100 MHz,  $\text{CDCl}_3$ )  $\delta$  136.4 (d,  $J = 2.4$  Hz), 135.0 (d,  $J = 12.4$  Hz), 131.9 (d,  $J = 6.7$  Hz), 130.0 (dd,  $J = 5.5, 2.3$  Hz), 128.71, 128.68, 127.8, 126.9 (d,  $J = 2.6$  Hz), 126.2 (d,  $J = 1.0$  Hz), 124.6 (d,  $J = 5.9$  Hz), 45.7 (d,  $J = 62.6$  Hz), 34.1 (dd,  $J = 59.8, 12.4$  Hz), 20.6, 12.7 (d,  $J = 12.7$  Hz) ppm;  $^{31}\text{P NMR}$  (162 MHz,  $\text{CDCl}_3$ )  $\delta$  45.23 ppm. **HRMS (ESI)** calculated  $[\text{M}+\text{H}]^+$  for  $\text{C}_{25}\text{H}_{28}\text{OP} = 375.1872$ , found: 375.1868.

**(*R,E*)-(4-phenylbut-3-en-2-yl)di-*p*-tolylphosphine oxide (3kb):** > 20:1 rr; white solid 50.6 mg;

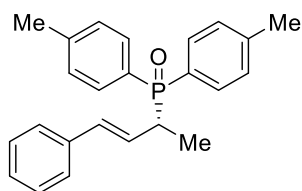

m.p. 160.3-164.0 °C; isolated yield: 70%; 95% ee;  $[\alpha]_D^{25} = +107.1$  (c = 1.0, CHCl<sub>3</sub>); The enantiomeric excess was determined by HPLC on Chiralpak AD-H column, hexane: isopropanol = 80:20, flow rate = 1.0 mL/min, UV detection at 254 nm,  $t_R = 23.3$  min (minor), 26.1 min (major); **<sup>1</sup>H NMR** (400 MHz, CDCl<sub>3</sub>) δ 7.73-7.62 (m, 4H), 7.30-7.27 (m, 2H), 7.26-7.16 (m, 7H), 6.33 (dd, *J* = 15.9, 4.2 Hz, 1H), 6.19 (ddd, *J* = 16.0, 8.2, 5.7 Hz, 1H), 3.36-3.26 (m, 1H), 2.39 (s, 3H), 2.35 (s, 3H), 1.39 (dd, *J* = 15.9, 7.1 Hz, 3H) ppm; **<sup>13</sup>C NMR** (100 MHz, CDCl<sub>3</sub>) δ 142.0 (dd, *J* = 10.5, 2.8 Hz), 136.9 (d, *J* = 2.9 Hz), 132.8 (d, *J* = 11.6 Hz), 131.4 (dd, *J* = 24.8, 8.9 Hz), 129.2 (dd, *J* = 25.3, 11.8 Hz), 128.5 (dd, *J* = 100.0, 55.3 Hz), 128.4, 127.4, 126.3 (d, *J* = 7.1 Hz), 126.2 (d, *J* = 0.7 Hz), 38.6 (d, *J* = 69.0 Hz), 21.5, 13.4 (d, *J* = 3.4 Hz) ppm; **<sup>31</sup>P NMR** (162 MHz, CDCl<sub>3</sub>) δ 34.92 ppm. **HRMS (ESI)** calculated [M+H]<sup>+</sup> for C<sub>24</sub>H<sub>26</sub>OP = 361.1716, found: 361.1715.

**(*R,E*)-bis(4-methoxyphenyl)(4-phenylbut-3-en-2-yl)phosphine oxide (3kc):** > 20:1 rr; white

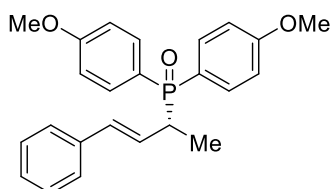

solid 33.8 mg; m.p. 135.7-138.9 °C; isolated yield: 43%; 95% ee;  $[\alpha]_D^{25} = +42.1$  (c = 1.0, CHCl<sub>3</sub>); The enantiomeric excess was determined by HPLC on Chiralpak OD-H column, hexane: isopropanol = 90:10, flow rate = 1.0 mL/min, UV detection at 254 nm,  $t_R = 18.6$  min (major), 23.8 min (minor); **<sup>1</sup>H NMR** (600 MHz, CDCl<sub>3</sub>) δ 7.75-7.71 (m, 2H), 7.69-7.65 (m, 2H), 7.28-7.23 (m, 4H), 7.21-7.18 (m, 1H), 7.00-6.98 (m, 2H), 6.94-6.92 (m, 2H), 6.32 (dd, *J* = 16.0, 4.2 Hz, 1H), 6.18 (ddd, *J* = 15.9, 8.2, 5.8 Hz, 1H), 3.85 (s, 3H), 3.81 (s, 3H), 3.31-3.24 (m, 1H), 1.38 (dd, *J* = 15.9, 7.1 Hz, 3H) ppm; **<sup>13</sup>C NMR** (150 MHz, CDCl<sub>3</sub>) δ 162.2 (dd, *J* = 11.3, 2.9 Hz), 136.9 (d, *J* = 2.9 Hz), 133.2 (dd, *J* = 43.6, 9.8 Hz), 132.7 (d, *J* = 11.5 Hz), 128.5, 127.4, 126.4 (d, *J* = 7.0 Hz), 126.2 (d, *J* = 1.4 Hz), 122.9 (d, *J* = 101.2, 86.8 Hz), 114.0 (dd, *J* = 39.9, 12.3 Hz), 55.3 (d, *J* = 7.6 Hz), 38.9 (d, *J* = 69.8 Hz), 13.4 (d, *J* = 3.4 Hz) ppm; **<sup>31</sup>P NMR** (162 MHz, CDCl<sub>3</sub>) δ 34.88 ppm. **HRMS (ESI)** calculated [M+H]<sup>+</sup> for C<sub>24</sub>H<sub>26</sub>O<sub>3</sub>P = 393.1614, found: 393.1612.

**(*R,E*)-bis(3-methoxyphenyl)(4-phenylbut-3-en-2-yl)phosphine oxide (3kd):** > 20:1 rr;

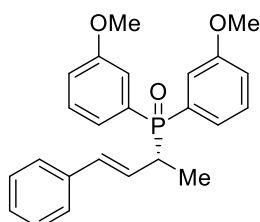

colorless oil 71.4 mg; isolated yield: 91%; 95% ee;  $[\alpha]_D^{25} = +73.1$  (c = 1.0, CHCl<sub>3</sub>); The enantiomeric excess was determined by HPLC on Chiralpak OD-H column, hexane: isopropanol = 90:10, flow rate = 1.0 mL/min, UV detection at 254 nm,  $t_R = 11.5$  min (major), 13.7 min (minor); **<sup>1</sup>H NMR** (600 MHz, CDCl<sub>3</sub>) δ 7.44-7.22 (m, 10H), 7.21-7.18 (m, 1H), 7.07-7.05 (m, 1H), 7.01-6.99 (m, 1H), 6.34 (dd, *J* = 15.9, 4.2 Hz, 1H), 6.21 (ddd, *J* = 15.9, 8.3, 5.8 Hz, 1H), 3.82 (s, 3H), 3.72 (s, 3H), 3.34-3.27 (m, 1H), 1.42 (dd, *J* = 16.1, 7.1 Hz, 3H) ppm; **<sup>13</sup>C NMR** (150 MHz, CDCl<sub>3</sub>) δ 159.5 (dd, *J* = 42.2, 13.9 Hz), 136.8 (d, *J* = 2.8 Hz), 133.1 (d, *J* = 11.5 Hz), 133.0 (dd, *J* = 93.6, 38.7 Hz), 129.6 (dd, *J* = 43.9, 13.5 Hz), 128.4, 127.5,

126.2 (d,  $J = 1.9$  Hz), 125.9 (d,  $J = 7.5$  Hz), 123.2 (dd,  $J = 34.2, 8.9$  Hz), 118.0 (dd,  $J = 24.6, 2.7$  Hz), 116.2 (d,  $J = 9.2$  Hz), 55.3 (d,  $J = 17.5$  Hz), 38.6 (d,  $J = 69.0$  Hz), 13.4 (d,  $J = 3.7$  Hz) ppm;  $^{31}\text{P}$  NMR (243 MHz,  $\text{CDCl}_3$ )  $\delta$  34.17 ppm. **HRMS (ESI)** calculated  $[\text{M}+\text{H}]^+$  for  $\text{C}_{24}\text{H}_{26}\text{O}_3\text{P}$  = 393.1614, found: 393.1613.

**(*R,E*)-bis(2-methoxyphenyl)(4-phenylbut-3-en-2-yl)phosphine oxide (3ke):** > 20:1 rr;

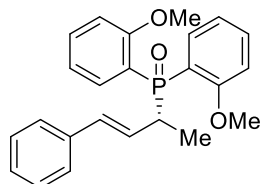

colorless oil 64.9 mg; isolated yield: 83%; 92% ee;  $[\alpha]_{\text{D}}^{25} = +94.1$  (c = 1.0,  $\text{CHCl}_3$ ); The enantiomeric excess was determined by HPLC on Chiralpak AD-H column, hexane: isopropanol = 80:20, flow rate = 1.0 mL/min, UV detection at 254 nm,  $t_{\text{R}} = 25.5$  min (major), 29.4 min (minor);  $^1\text{H}$  NMR (600 MHz,  $\text{CDCl}_3$ )  $\delta$  7.83 (ddd,  $J = 12.8, 7.6, 1.8$  Hz, 1H), 7.77 (ddd,  $J = 12.8, 7.6, 1.7$  Hz, 1H), 7.46-7.43 (m, 1H), 7.42-7.38 (m, 1H), 7.23-7.18 (m, 4H), 7.16-7.13 (m, 1H), 7.04-6.98 (m, 2H), 6.89 (dd,  $J = 8.1, 5.1$  Hz, 1H), 6.81 (dd,  $J = 8.1, 5.2$  Hz, 1H), 6.42 (dd,  $J = 15.9, 4.3$  Hz, 1H), 6.33 (ddd,  $J = 15.7, 8.4, 6.9$  Hz, 1H), 3.86-3.78 (m, 1H), 3.77 (s, 3H), 3.65 (s, 3H), 1.41 (dd,  $J = 17.2, 7.1$  Hz, 3H) ppm;  $^{13}\text{C}$  NMR (150 MHz,  $\text{CDCl}_3$ )  $\delta$  160.2 (dd,  $J = 20.0, 3.5$  Hz), 137.5 (d,  $J = 2.8$  Hz), 134.3 (dd,  $J = 10.2, 6.2$  Hz), 133.1 (d,  $J = 2.1$  Hz), 131.1 (d,  $J = 13.0$  Hz), 128.4 (d,  $J = 6.9$  Hz), 128.3, 127.0, 126.1 (d,  $J = 1.8$  Hz), 120.9 (dd,  $J = 96.5, 44.8$  Hz), 120.6 (dd,  $J = 17.1, 11.1$  Hz), 110.7 (dd,  $J = 37.7, 6.6$  Hz), 55.3 (d,  $J = 20.1$  Hz), 38.4 (d,  $J = 72.4$  Hz), 14.2 (d,  $J = 3.6$  Hz) ppm;  $^{31}\text{P}$  NMR (243 MHz,  $\text{CDCl}_3$ )  $\delta$  36.19 ppm. **HRMS (ESI)** calculated  $[\text{M}+\text{H}]^+$  for  $\text{C}_{24}\text{H}_{26}\text{O}_3\text{P}$  = 393.1614, found: 393.1612.

**(*R,E*)-bis(4-chlorophenyl)(4-phenylbut-3-en-2-yl)phosphine oxide (3kf):** > 20:1 rr; white

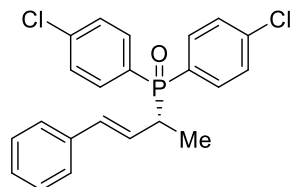

solid 31.2 mg; m.p. 144.8-145.9 °C; isolated yield: 39%; 95% ee;  $[\alpha]_{\text{D}}^{25} = +114.6$  (c = 1.0,  $\text{CHCl}_3$ ); The enantiomeric excess was determined by HPLC on Chiralpak OD-H column, hexane: isopropanol = 90:10, flow rate = 1.0 mL/min, UV detection at 254 nm,  $t_{\text{R}} = 10.3$  min (major), 13.6 min (minor);  $^1\text{H}$  NMR (400 MHz,  $\text{CDCl}_3$ )  $\delta$  7.78-7.72 (m, 2H), 7.71-7.65 (m, 2H), 7.51-7.47 (m, 2H), 7.44-7.40 (m, 2H), 7.30-7.26 (m, 2H), 7.24-7.20 (m, 3H), 6.35 (dd,  $J = 15.9, 4.3$  Hz, 1H), 6.15 (ddd,  $J = 15.9, 8.4, 5.9$  Hz, 1H), 3.36-3.25 (m, 1H), 1.40 (dd,  $J = 16.3, 7.1$  Hz, 3H) ppm;  $^{13}\text{C}$  NMR (100 MHz,  $\text{CDCl}_3$ )  $\delta$  138.6 (dd,  $J = 10.2, 3.3$  Hz), 136.4 (d,  $J = 2.9$  Hz), 133.7 (d,  $J = 11.8$  Hz), 132.7 (dd,  $J = 22.1, 9.2$  Hz), 129.8 (d,  $J = 99.0, 43.0$  Hz), 129.0 (dd,  $J = 27.8, 11.9$  Hz), 128.6, 127.8, 126.2, 125.0 (d,  $J = 7.5$  Hz), 38.5 (d,  $J = 69.8$  Hz), 13.4 (d,  $J = 3.7$  Hz) ppm;  $^{31}\text{P}$  NMR (162 MHz,  $\text{CDCl}_3$ )  $\delta$  33.49 ppm. **HRMS (ESI)** calculated  $[\text{M}+\text{H}]^+$  for  $\text{C}_{22}\text{H}_{20}\text{Cl}_2\text{OP}$  = 401.0623, found: 401.0636.

**(R,E)-(4-phenylbut-3-en-2-yl)bis(4-(trifluoromethyl)phenyl)phosphine oxide (3kg):** > 20:1

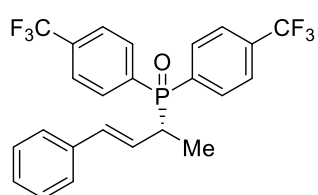

rr; white solid 66.3 mg; m.p. 150.6-152.6 °C; isolated yield 64%; 84% ee;  $[\alpha]_D^{25} = +71.5$  (c = 1.0, CHCl<sub>3</sub>); The enantiomeric excess was determined by HPLC on Chiralpak AD-H column, hexane: isopropanol = 85:15, flow rate = 1.0 mL/min, UV detection at 254 nm,  $t_R = 16.2$  min (major), 17.8 min (minor); **<sup>1</sup>H NMR** (600 MHz, CDCl<sub>3</sub>) δ 8.00 (dd, *J* = 10.5, 8.0 Hz, 2H), 7.93 (dd, *J* = 10.5, 8.1 Hz, 2H), 7.79 (dd, *J* = 8.4, 2.3 Hz, 2H), 7.72 (dd, *J* = 8.4, 2.3 Hz, 2H), 7.29-7.27 (m, 2H), 7.24-7.21 (m, 3H), 6.39 (dd, *J* = 15.9, 4.4 Hz, 1H), 6.19 (ddd, *J* = 15.9, 8.6, 6.0 Hz, 1H), 3.46-3.39 (m, 1H), 1.44 (dd, *J* = 16.5, 7.1 Hz, 3H) ppm; **<sup>13</sup>C NMR** (150 MHz, CDCl<sub>3</sub>) δ 136.2 (d, *J* = 3.0 Hz), 135.5 (dd, *J* = 92.9, 51.4 Hz), 134.2 (d, *J* = 11.9 Hz), 133.8 (ddq, *J* = 32.8, 20.6, 3.0 Hz), 131.7 (dd, *J* = 24.7, 8.9 Hz), 128.6, 127.9, 126.2 (d, *J* = 1.4 Hz), 125.5 (ddq, *J* = 40.5, 11.4, 3.6 Hz), 124.3 (d, *J* = 7.6 Hz), 123.4 (dq, *J* = 271.5, 2.3 Hz), 38.3 (d, *J* = 69.6 Hz), 13.3 (d, *J* = 3.6 Hz) ppm; **<sup>31</sup>P NMR** (243 MHz, CDCl<sub>3</sub>) δ 31.92 ppm; **<sup>19</sup>F NMR** (565 MHz, CDCl<sub>3</sub>) δ -63.19, -63.21 ppm. **HRMS (ESI)** calculated  $[M+H]^+$  for C<sub>24</sub>H<sub>20</sub>F<sub>6</sub>OP = 469.1151, found: 469.1147.

**(R,E)-di(naphthalen-2-yl)(4-phenylbut-3-en-2-yl)phosphine oxide (3kh):** > 20:1 rr; white

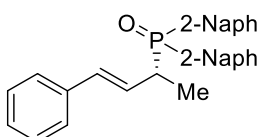

solid 72.2 mg; m.p. 136.4-137.8 °C; isolated yield: 83%; 93% ee;  $[\alpha]_D^{25} = +95.7$  (c = 1.0, CHCl<sub>3</sub>); The enantiomeric excess was determined by HPLC on Chiralpak OD-H column, hexane: isopropanol = 90:10, flow rate = 1.0 mL/min, UV detection at 254 nm,  $t_R = 15.6$  min (major), 18.8 min (minor); **<sup>1</sup>H NMR** (400 MHz, CDCl<sub>3</sub>) δ 8.50 (dd, *J* = 22.5, 12.8 Hz, 2H), 7.95-7.91 (m, 2H), 7.89-7.77 (m, 6H), 7.59-7.47 (m, 4H), 7.21-7.13 (m, 5H), 6.43 (dd, *J* = 16.0, 4.2 Hz, 1H), 6.29 (ddd, *J* = 15.9, 8.1, 5.7 Hz, 1H), 3.63-3.53 (m, 1H), 1.48 (dd, *J* = 16.0, 7.1 Hz, 3H) ppm; **<sup>13</sup>C NMR** (100 MHz, CDCl<sub>3</sub>) δ 136.7 (d, *J* = 2.9 Hz), 134.5 (dd, *J* = 4.4, 2.3 Hz), 133.6 (dd, *J* = 28.0, 7.7 Hz), 133.2 (d, *J* = 11.6 Hz), 132.5 (t, *J* = 12.7 Hz), 128.84, 128.83 (dd, *J* = 94.9, 42.8 Hz), 128.40, 128.39 (d, *J* = 11.1 Hz), 128.1, 128.0 (d, *J* = 11.4 Hz), 127.7 (dd, *J* = 31.6, 25.9 Hz), 126.8 (d, *J* = 14.7 Hz), 126.1 (dd, *J* = 6.1, 5.1 Hz), 125.9 (d, *J* = 2.5 Hz), 125.8, 38.4 (d, *J* = 68.9 Hz), 13.5 (d, *J* = 3.5 Hz) ppm; **<sup>31</sup>P NMR** (162 MHz, CDCl<sub>3</sub>) δ 34.83 ppm. **HRMS (ESI)** calculated  $[M+H]^+$  for C<sub>30</sub>H<sub>26</sub>OP = 433.1716, found: 433.1732.

**(R,E)-di(naphthalen-1-yl)(4-phenylbut-3-en-2-yl)phosphine oxide (3ki):** > 20:1 rr; white

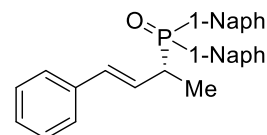

solid 66.6 mg; m.p. 177.2-178.9 °C; isolated yield: 77%; 95% ee;  $[\alpha]_D^{25} = +42.9$  (c = 1.0, CHCl<sub>3</sub>); The enantiomeric excess was determined by HPLC on Chiralpak OD-H column, hexane: isopropanol = 85:15, flow rate = 1.0 mL/min, UV detection at 254 nm,  $t_R = 14.7$  min (major), 22.6 min (minor); **<sup>1</sup>H NMR** (400 MHz, CDCl<sub>3</sub>) δ 8.82 (d, *J* = 8.2 Hz, 2H), 8.01-7.90 (m, 4H), 7.85-7.82 (m, 1H), 7.79-7.76 (m, 1H), 7.51-7.34 (m, 6H), 7.20-7.11 (m, 3H), 7.08-7.05 (m, 2H), 6.38 (dd, *J* = 16.0, 3.4 Hz, 1H), 6.30 (ddd, *J* = 15.9, 7.7, 5.9 Hz, 1H), 3.85-3.75 (m, 1H), 1.56 (dd, *J* = 16.0, 7.0 Hz, 3H) ppm; **<sup>13</sup>C NMR** (100 MHz, CDCl<sub>3</sub>) δ 136.8 (d, *J* = 2.4 Hz), 134.0 (dd, *J* = 8.0, 2.4 Hz), 133.8 (dd, *J* = 8.2, 5.0 Hz), 132.9 (dd, *J* = 9.9, 3.0 Hz), 132.4 (d, *J* = 12.0 Hz),

131.7 (dd,  $J = 9.9, 2.7$  Hz), 129.0 (dd,  $J = 92.1, 5.2$  Hz), 128.7 (d,  $J = 14.3$  Hz), 128.3, 127.2 (d,  $J = 7.6$  Hz), 127.1, 127.0 (d,  $J = 6.3$  Hz), 126.9 (d,  $J = 6.5$  Hz), 126.3, 126.1 (d,  $J = 4.8$  Hz), 124.2 (dd,  $J = 13.4, 8.3$  Hz), 39.1 (d,  $J = 69.9$  Hz), 14.6 (d,  $J = 3.5$  Hz) ppm;  $^{31}\text{P}$  NMR (162 MHz,  $\text{CDCl}_3$ )  $\delta$  39.99 ppm. **HRMS (ESI)** calculated  $[\text{M}+\text{H}]^+$  for  $\text{C}_{30}\text{H}_{26}\text{OP} = 433.1716$ , found: 433.1710.

**(*R,E*)-dibenzyl(4-phenylbut-3-en-2-yl)phosphine oxide (3kj):** > 20:1 rr; white solid 32.5 mg;

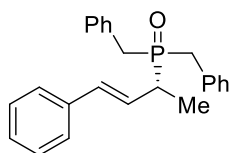

m.p. 119.4-121.8 °C; isolated yield: 45%; 93% ee;  $[\alpha]_{\text{D}}^{25} = +79.6$  ( $c = 1.0$ ,  $\text{CHCl}_3$ ); The enantiomeric excess was determined by HPLC on Chiralpak AD-H column, hexane: isopropanol = 90:10, flow rate = 1.0 mL/min, UV detection at 254 nm,  $t_{\text{R}} = 18.3$  min (major), 19.2 min (minor);  $^1\text{H}$  NMR (400 MHz,  $\text{CDCl}_3$ )  $\delta$  7.34-7.27 (m, 15H), 6.41 (dd,  $J = 15.9, 3.8$  Hz, 1H), 6.14 (ddd,  $J = 15.9, 8.4, 5.1$  Hz, 1H), 3.22-3.15 (m, 1H), 3.13-3.08 (m, 2H), 3.05-3.01 (m, 1H), 2.84-2.72 (m, 1H), 1.33 (dd,  $J = 15.1, 7.1$  Hz, 3H) ppm;  $^{13}\text{C}$  NMR (100 MHz,  $\text{CDCl}_3$ )  $\delta$  136.6 (d,  $J = 2.7$  Hz), 132.9 (d,  $J = 11.6$  Hz), 131.8 (dd,  $J = 7.1, 4.0$  Hz), 129.9 (dd,  $J = 10.1, 4.0$  Hz), 128.8, 128.7, 127.8, 126.9 (dd,  $J = 7.1, 3.0$  Hz), 126.2, 126.1 (d,  $J = 6.3$  Hz), 37.2 (d,  $J = 62.6$  Hz), 33.8 (dd,  $J = 59.6, 32.8$  Hz), 13.1 (d,  $J = 3.5$  Hz) ppm;  $^{31}\text{P}$  NMR (162 MHz,  $\text{CDCl}_3$ )  $\delta$  45.88 ppm. **HRMS (ESI)** calculated  $[\text{M}+\text{H}]^+$  for  $\text{C}_{24}\text{H}_{26}\text{OP} = 361.1716$ , found: 361.1712.

**(*R,E*)-bis(3-chlorophenyl)(4-phenylbut-3-en-2-yl)phosphine oxide (3kk):** > 20:1 rr; white

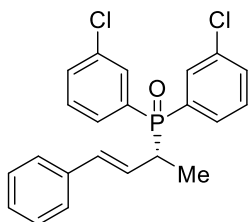

solid 43.3 mg; m.p. 113.4-116.7 °C; isolated yield: 54%; 94% ee;  $[\alpha]_{\text{D}}^{25} = +118.0$  ( $c = 1.0$ ,  $\text{CHCl}_3$ ); The enantiomeric excess was determined by HPLC on Chiralpak OD-H column, hexane: isopropanol = 90:10, flow rate = 1.0 mL/min, UV detection at 254 nm,  $t_{\text{R}} = 8.3$  min (major), 11.9 min (minor);  $^1\text{H}$  NMR (600 MHz,  $\text{CDCl}_3$ )  $\delta$  7.83 (dt,  $J = 11.1, 1.7$  Hz, 1H), 7.75 (dt,  $J = 11.2, 1.7$  Hz, 1H), 7.70 (ddt,  $J = 10.3, 7.5, 1.3$  Hz, 1H), 7.63 (ddt,  $J = 10.3, 7.6, 1.2$  Hz, 1H), 7.53 (ddt,  $J = 8.0, 2.1, 1.1$  Hz, 1H), 7.48-7.44 (m, 2H), 7.38 (td,  $J = 7.8, 3.3$  Hz, 1H), 7.29-7.20 (m, 5H), 6.38 (dd,  $J = 15.9, 4.5$  Hz, 1H), 6.15 (ddd,  $J = 15.9, 8.6, 6.0$  Hz, 1H), 3.36-3.29 (m, 1H), 1.42 (dd,  $J = 16.5, 7.1$  Hz, 3H) ppm;  $^{13}\text{C}$  NMR (150 MHz,  $\text{CDCl}_3$ )  $\delta$  136.4 (d,  $J = 3.1$  Hz), 135.2 (dd,  $J = 44.7, 14.7$  Hz), 134.0 (d,  $J = 11.9$  Hz), 133.6 (dd,  $J = 95.1, 55.0$  Hz), 132.2 (dd,  $J = 17.4, 2.7$  Hz), 131.2 (dd,  $J = 29.5, 9.3$  Hz), 130.1 (dd,  $J = 44.7, 12.4$  Hz), 129.2 (dd,  $J = 30.7, 8.1$  Hz), 128.5, 127.8, 126.3 (d,  $J = 1.8$  Hz), 124.8 (d,  $J = 7.6$  Hz), 38.4 (d,  $J = 69.4$  Hz), 13.4 (d,  $J = 3.8$  Hz) ppm;  $^{31}\text{P}$  NMR (243 MHz,  $\text{CDCl}_3$ )  $\delta$  31.94 ppm. **HRMS (ESI)** calculated  $[\text{M}+\text{H}]^+$  for  $\text{C}_{22}\text{H}_{20}\text{Cl}_2\text{OP} = 401.0623$ , found: 401.0618.

**(4-methoxyphenyl)(phenyl)((*R,E*)-1-phenylpent-1-en-3-yl)phosphine oxide (3al):** > 20:1 rr;

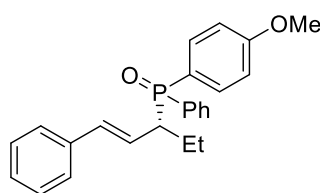

white solid 55.8 mg (a mixture of diastereomer); isolated yield 74%; dr = 1.1:1; 97% ee, 98% ee; The enantiomeric excess was determined by HPLC on Chiralpak IC-H column, hexane: isopropanol = 85:15, flow rate = 0.4 mL/min, UV detection at 254 nm, diastereomer 1:  $t_{\text{R}} = 76.8$  min (major), 127.4 min (minor);

diastereomer 2:  $t_R = 80.5$  min (major), 117.3 min (minor);  $^1\text{H NMR}$  (600 MHz,  $\text{CDCl}_3$ , reported as a mixture of diastereomers)  $\delta$  7.85-7.81 (m, 2H), 7.80-7.75 (m, 2.2H), 7.75-7.71 (m, 2.2H), 7.69-7.65 (m, 2H), 7.53-7.50 (m, 1.1H), 7.49-7.45 (m, 2.2H), 7.44-7.42 (m, 1H), 7.41-7.37 (m, 2H), 7.28-7.18 (m, 10.5H), 7.00 (dd,  $J = 8.8, 2.2$  Hz, 2.2H), 6.91 (dd,  $J = 8.8, 2.3$  Hz, 2H), 6.32-6.26 (m, 2.1H), 6.09-6.02 (m, 2.1H), 3.83 (s, 3.3H), 3.78 (s, 3H), 3.05-2.97 (m, 2.1H), 1.98-1.87 (m, 2.1H), 1.76-1.67 (m, 2.1H), 0.97-0.94 (m, 6.3H) ppm;  $^{13}\text{C NMR}$  (150 MHz,  $\text{CDCl}_3$ , reported as a mixture of diastereomers)  $\delta$  162.2 (d,  $J = 2.8$  Hz), 162.0 (d,  $J = 2.7$  Hz), 136.8 (d,  $J = 2.9$  Hz), 134.9 (d,  $J = 2.7$  Hz), 134.8 (d,  $J = 2.5$  Hz), 133.2 (d,  $J = 9.8$  Hz), 133.0 (d,  $J = 9.8$  Hz), 132.4 (d,  $J = 94.8$  Hz), 132.1 (d,  $J = 97.4$  Hz), 131.5 (d,  $J = 2.7$  Hz), 131.34 (d,  $J = 2.8$  Hz), 131.30 (d,  $J = 8.7$  Hz), 131.1 (d,  $J = 8.7$  Hz), 128.47 (d,  $J = 11.3$  Hz), 128.41, 128.40, 128.2 (d,  $J = 11.4$  Hz), 127.4 (d,  $J = 3.0$  Hz), 126.12, 126.11, 126.10, 126.09, 124.6 (d,  $J = 7.6$  Hz), 122.8 (d,  $J = 100.5$  Hz), 122.6 (d,  $J = 103.1$  Hz), 114.1 (d,  $J = 12.2$  Hz), 113.8 (d,  $J = 12.3$  Hz), 55.24, 55.17, 46.8 (d,  $J = 69.5$  Hz), 46.7 (d,  $J = 69.4$  Hz), 21.0, 12.7 (d,  $J = 13.6$  Hz), 12.6 (d,  $J = 13.6$  Hz) ppm;  $^{31}\text{P NMR}$  (243 MHz,  $\text{CDCl}_3$ , reported as a mixture of diastereomers)  $\delta$  33.31 ppm (the peaks of the two diastereomers overlap totally). **HRMS (ESI)** calculated  $[\text{M}+\text{H}]^+$  for  $\text{C}_{24}\text{H}_{26}\text{O}_2\text{P}$  = 377.1665, found: 377.1661.

**phenyl((*R,E*)-1-phenylpent-1-en-3-yl)(4-(trifluoromethyl)phenyl)phosphine oxide (3am): >**

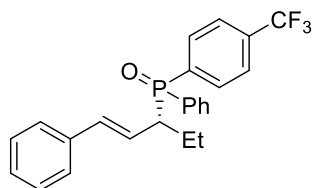

20:1 rr; white solid 60.5 mg (a mixture of diastereomer); isolated yield 73%; dr = 1.1:1; 95% ee, 95% ee; The enantiomeric excess was determined by HPLC on Chiralpak OD-H column, hexane: isopropanol = 94:6, flow rate = 0.3 mL/min, UV detection at 254 nm, diastereomer 1:  $t_R = 25.4$  min (major), 36.8 min (minor); diastereomer 2:  $t_R = 27.1$  min (major), 29.9 min (minor);  $^1\text{H NMR}$  (400 MHz,  $\text{CDCl}_3$ , reported as a mixture of diastereomers)  $\delta$  8.02-7.97 (m, 1H), 7.90-7.83 (m, 2H), 7.78-7.73 (m, 2H), 7.67-7.65 (m, 1H), 7.57-7.42 (m, 3H), 7.29-7.26 (m, 2H), 7.24-7.19 (m, 3H), 6.36-6.27 (m, 1H), 6.11-6.02 (m, 1H), 3.11-3.03 (m, 1H), 1.92-1.72 (m, 2H), 1.00-0.96 (m, 3H) ppm (the peaks of the two diastereomers overlap totally);  $^{13}\text{C NMR}$  (150 MHz,  $\text{CDCl}_3$ , reported as a mixture of diastereomers)  $\delta$  136.8 (d,  $J = 90.7$  Hz), 136.6 (d,  $J = 93.7$  Hz), 136.5 (d,  $J = 2.8$  Hz), 136.4 (d,  $J = 3.2$  Hz), 135.6 (d,  $J = 12.5$  Hz), 135.5 (d,  $J = 12.4$  Hz), 133.43 (q,  $J = 31.0$  Hz), 133.41 (q,  $J = 31.1$  Hz), 132.1 (d,  $J = 2.8$  Hz), 131.9 (d,  $J = 2.7$  Hz), 131.8 (d,  $J = 8.7$  Hz), 131.7 (d,  $J = 8.8$  Hz), 131.24 (d,  $J = 8.7$  Hz), 131.18 (d,  $J = 95.1$  Hz), 131.08 (d,  $J = 8.6$  Hz), 130.95 (d,  $J = 97.0$  Hz), 128.9 (d,  $J = 11.4$  Hz), 128.54, 128.53 (d,  $J = 11.7$  Hz), 128.52, 127.72, 127.68, 126.19 (d,  $J = 1.8$  Hz), 126.15 (d,  $J = 1.7$  Hz), 125.3 (dq,  $J = 48.1, 3.4$  Hz), 125.2 (dq,  $J = 48.5, 3.7$  Hz), 123.67 (d,  $J = 7.6$  Hz), 123.66 (d,  $J = 7.6$  Hz), 123.53 (q,  $J = 272.6$  Hz), 123.51 (q,  $J = 272.7$  Hz), 46.5 (d,  $J = 69.4$  Hz), 46.3 (d,  $J = 69.3$  Hz), 21.02 (d,  $J = 2.7$  Hz), 20.99 (d,  $J = 2.6$  Hz), 12.63 (d,  $J = 13.5$  Hz), 12.62 (d,  $J = 13.6$  Hz) ppm;  $^{31}\text{P NMR}$  (162 MHz,  $\text{CDCl}_3$ , reported as a mixture of diastereomers)  $\delta$  32.89, 32.65 ppm;  $^{19}\text{F NMR}$  (376 MHz,  $\text{CDCl}_3$ , reported as a mixture of diastereomers)  $\delta$  -63.00, -63.02 ppm. **HRMS (ESI)** calculated  $[\text{M}+\text{H}]^+$  for  $\text{C}_{24}\text{H}_{23}\text{F}_3\text{OP}$  = 415.1433, found: 415.1427.

**benzyl(phenyl)((*R,E*)-1-phenylpent-1-en-3-yl)phosphine oxide (3an):** > 20:1 rr; white solid

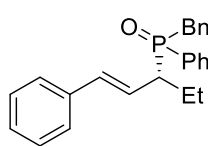

37.9 mg (a mixture of diastereomer); isolated yield 53%; dr = 1.3:1; 97% ee, 96% ee; The enantiomeric excess was determined by HPLC on Chiralpak AD-H column, hexane: isopropanol = 85:15, flow rate = 1.0 mL/min, UV detection at 254 nm, diastereomer 1:  $t_R$  = 14.3 min (minor), 23.1 min (major); diastereomer 2:  $t_R$  = 10.1 min (major), 20.3 min (minor);  **$^1\text{H NMR}$**  (600 MHz,  $\text{CDCl}_3$ , reported as a mixture of diastereomers)  $\delta$  7.70-7.67 (m, 2H), 7.60-7.56 (m, 2.6H), 7.53-7.49 (m, 1.3H), 7.49-7.43 (m, 5.6H), 7.42-7.39 (m, 2.6H), 7.37-7.25 (m, 12.6H), 7.23-7.20 (m, 1.3H), 7.15-7.11 (m, 3.9H), 7.03-7.01 (m, 2.6H), 6.57 (dd,  $J$  = 15.8, 4.1 Hz, 1.3H), 6.40 (dd,  $J$  = 15.9, 4.7 Hz, 1H), 6.30 (ddd,  $J$  = 15.8, 10.1, 5.7 Hz, 1.3H), 5.77 (ddd,  $J$  = 15.5, 10.0, 5.1 Hz, 1H), 3.54-3.40 (m, 3.3H), 3.28 (dd,  $J$  = 14.7, 10.6 Hz, 1.3H), 2.77-2.65 (m, 2.3H), 2.21-2.11 (m, 1H), 1.71-1.64 (m, 2.6H), 1.36-1.28 (m, 1H), 0.90-0.87 (m, 6.9H) ppm;  **$^{13}\text{C NMR}$**  (150 MHz,  $\text{CDCl}_3$ , reported as a mixture of diastereomers)  $\delta$  136.51 (d,  $J$  = 1.2 Hz), 136.50 (d,  $J$  = 2.2 Hz), 135.2 (d,  $J$  = 12.0 Hz), 134.6 (d,  $J$  = 12.7 Hz), 131.7 (d,  $J$  = 2.8 Hz), 131.53 (d,  $J$  = 2.7 Hz), 131.47 (d,  $J$  = 6.6 Hz), 131.4 (d,  $J$  = 7.6 Hz), 131.3 (d,  $J$  = 7.3 Hz), 131.1 (d,  $J$  = 8.2 Hz), 130.6 (d,  $J$  = 90.4 Hz), 130.2 (d,  $J$  = 90.0 Hz), 130.1 (d,  $J$  = 5.1 Hz), 129.9 (d,  $J$  = 5.2 Hz), 128.7, 128.6, 128.5 (d,  $J$  = 2.2 Hz), 128.26 (d,  $J$  = 2.2 Hz), 128.25, 128.2, 127.97 (d,  $J$  = 72.5 Hz), 127.95 (d,  $J$  = 68.5 Hz), 126.8 (d,  $J$  = 2.7 Hz), 126.5 (d,  $J$  = 2.9 Hz), 126.3 (d,  $J$  = 1.3 Hz), 126.1 (d,  $J$  = 2.0 Hz), 125.3 (d,  $J$  = 5.6 Hz), 124.6 (d,  $J$  = 7.3 Hz), 47.0 (d,  $J$  = 65.8 Hz), 46.2 (d,  $J$  = 65.4 Hz), 36.2 (d,  $J$  = 63.2 Hz), 34.7 (d,  $J$  = 63.6 Hz), 21.0 (d,  $J$  = 2.8 Hz), 20.3 (d,  $J$  = 3.1 Hz), 12.6 (d,  $J$  = 13.1 Hz), 12.4 (d,  $J$  = 13.0 Hz) ppm;  **$^{31}\text{P NMR}$**  (243 MHz,  $\text{CDCl}_3$ , reported as a mixture of diastereomers)  $\delta$  39.09, 38.16 ppm. **HRMS (ESI)** calculated  $[\text{M}+\text{H}]^+$  for  $\text{C}_{24}\text{H}_{26}\text{OP}$  = 361.1716, found: 361.1711.

**(4-methoxyphenyl)(phenyl)((*R,E*)-4-phenylbut-3-en-2-yl)phosphine oxide (3kl):** > 20:1 rr;

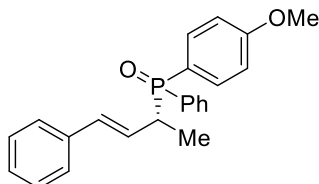

white solid 40.2 mg (a mixture of diastereomer); isolated yield 55%; dr = 1.3:1; 95% ee, 92% ee; The enantiomeric excess was determined by HPLC on Chiralpak IA-H column, hexane: isopropanol = 80:20, flow rate = 0.3 mL/min, UV detection at 254 nm, diastereomer 1:  $t_R$  = 50.6 min (minor), 66.9 min (major); diastereomer 2:  $t_R$  = 57.9 min (major), 61.7 min (minor);  **$^1\text{H NMR}$**  (600 MHz,  $\text{CDCl}_3$ , reported as a mixture of diastereomers)  $\delta$  7.84-7.80 (m, 2H), 7.78-7.73 (m, 5H), 7.72-7.68 (m, 2H), 7.54-7.51 (m, 1H), 7.50-7.46 (m, 3.3H), 7.43-7.40 (m, 2.6H), 7.28-7.18 (m, 11.7H), 7.02-6.99 (m, 2.6H), 6.95-6.92 (m, 2H), 6.35-6.29 (m, 2.3H), 6.22-6.16 (m, 2.3H), 3.84 (s, 3.9H), 3.81 (s, 3H), 3.34-3.28 (m, 2.3H), 1.42-1.37 (m, 6.9H) ppm;  **$^{13}\text{C NMR}$**  (150 MHz,  $\text{CDCl}_3$ , reported as a mixture of diastereomers)  $\delta$  162.3 (d,  $J$  = 2.8 Hz), 162.2 (d,  $J$  = 2.8 Hz), 136.8 (d,  $J$  = 3.0 Hz), 133.3 (d,  $J$  = 9.8 Hz), 133.1 (d,  $J$  = 9.8 Hz), 132.88 (d,  $J$  = 11.4 Hz), 132.87 (d,  $J$  = 11.3 Hz), 132.2 (d,  $J$  = 95.0 Hz), 131.7 (d,  $J$  = 97.4 Hz), 131.6 (d,  $J$  = 2.7 Hz), 131.5 (d,  $J$  = 2.7 Hz), 131.4 (d,  $J$  = 8.6 Hz), 131.2 (d,  $J$  = 8.7 Hz), 128.52 (d,  $J$  = 11.2 Hz), 128.45, 128.43, 128.2 (d,  $J$  = 11.3 Hz), 127.42, 127.41, 126.16, 126.14, 126.13, 126.08, 122.7 (d,  $J$  = 100.9 Hz), 122.1 (d,  $J$  = 102.9 Hz), 114.2 (d,  $J$  = 12.2 Hz), 113.9 (d,  $J$  = 12.3 Hz), 55.3, 55.2, 38.70 (d,  $J$  = 69.1 Hz), 38.68 (d,  $J$  = 69.2 Hz), 13.4 (d,  $J$  = 3.5 Hz) ppm;  **$^{31}\text{P NMR}$**  (243 MHz,  $\text{CDCl}_3$ , reported as a mixture of diastereomers)  $\delta$  34.13 ppm (the peaks of the two diastereomers overlap totally). **HRMS (ESI)** calculated  $[\text{M}+\text{H}]^+$  for  $\text{C}_{23}\text{H}_{24}\text{O}_2\text{P}$  = 363.1508, found: 363.1506.



**phenyl((*R,E*)-4-phenylbut-3-en-2-yl)(4-(trifluoromethyl)phenyl)phosphine oxide (3km):** >

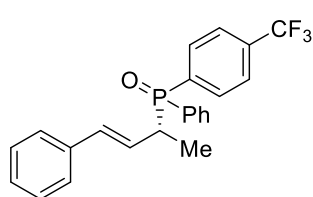

20:1 rr; white solid 71.7 mg (a mixture of diastereomer); isolated yield 90%; dr = 1.3:1; 91% ee, 94% ee; The enantiomeric excess was determined by HPLC on Chiralpak AD-H column, hexane: isopropanol = 85:15, flow rate = 1.0 mL/min, UV detection at 254 nm, diastereomer 1:  $t_R$  = 16.6 min (major), 21.6 min (minor); diastereomer 2:  $t_R$  = 13.1 min (minor), 25.7 min (major); **<sup>1</sup>H NMR** (400 MHz, CDCl<sub>3</sub>, reported as a mixture of diastereomers)  $\delta$  8.01-7.97 (m, 1H), 7.93-7.72 (m, 4H), 7.69-7.67 (m, 1H), 7.60-7.44 (m, 3H), 7.29-7.25 (m, 2H), 7.23-7.21 (m, 3H), 6.39-6.30 (m, 1H), 6.22-6.14 (m, 1H), 3.43-3.33 (m, 1H), 1.46-1.39 (m, 3H) ppm (the peaks of the two diastereomers overlap totally); **<sup>13</sup>C NMR** (150 MHz, CDCl<sub>3</sub>, reported as a mixture of diastereomers)  $\delta$  136.6 (d,  $J$  = 91.6 Hz), 136.5 (d,  $J$  = 2.9 Hz), 136.4 (d,  $J$  = 2.7 Hz), 136.1 (d,  $J$  = 97.6 Hz), 133.68 (d,  $J$  = 11.8 Hz), 133.66 (d,  $J$  = 11.6 Hz), 133.43 (dq,  $J$  = 32.9, 20.2 Hz), 133.41 (dq,  $J$  = 32.9, 20.0 Hz), 132.2 (d,  $J$  = 2.8 Hz), 132.1 (d,  $J$  = 2.7 Hz), 131.9 (d,  $J$  = 8.7 Hz), 131.7 (d,  $J$  = 8.8 Hz), 131.3 (d,  $J$  = 8.6 Hz), 131.1 (d,  $J$  = 8.7 Hz), 131.0 (d,  $J$  = 98.8 Hz), 130.6 (d,  $J$  = 97.9 Hz), 128.9 (d,  $J$  = 11.4 Hz), 128.60 (d,  $J$  = 11.5 Hz), 128.55, 128.52, 127.73, 127.68, 126.20 (d,  $J$  = 1.4 Hz), 126.17 (d,  $J$  = 1.4 Hz), 125.4 (dq,  $J$  = 42.5, 3.4 Hz), 125.2 (dq,  $J$  = 42.6, 3.5 Hz), 125.1, 125.0, 123.5 (q,  $J$  = 272.5 Hz), 38.43 (d,  $J$  = 69.2 Hz), 38.40 (d,  $J$  = 69.2 Hz), 13.41 (d,  $J$  = 3.5 Hz), 13.36 (d,  $J$  = 3.6 Hz) ppm; **<sup>31</sup>P NMR** (162 MHz, CDCl<sub>3</sub>, reported as a mixture of diastereomers)  $\delta$  33.69, 33.46 ppm; **<sup>19</sup>F NMR** (376 MHz, CDCl<sub>3</sub>, reported as a mixture of diastereomers)  $\delta$  -63.01, -63.02 ppm. **HRMS (ESI)** calculated  $[M+H]^+$  for C<sub>23</sub>H<sub>21</sub>F<sub>3</sub>OP = 401.1277, found: 401.1270.

**benzyl(phenyl)((*R,E*)-4-phenylbut-3-en-2-yl)phosphine oxide (3kn):** > 20:1 rr; white solid

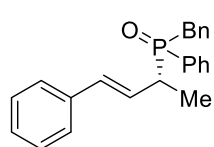

24.4 mg; isolated yield 35%; dr = 1.1:1; 96% ee, 94% ee; The enantiomeric excess was determined by HPLC on Chiralpak AD-H column, hexane: isopropanol = 85:15, flow rate = 1.0 mL/min, UV detection at 254 nm, diastereomer 1:  $t_R$  = 17.8 min (minor), 24.9 min (major); diastereomer 2:  $t_R$  = 11.2 min (major), 14.3 min (minor); diastereomer 1: **<sup>1</sup>H NMR** (600 MHz, CDCl<sub>3</sub>)  $\delta$  7.61-7.58 (m, 2H), 7.51-7.48 (m, 1H), 7.43-7.40 (m, 4H), 7.34 (t,  $J$  = 7.6 Hz, 2H), 7.28-7.25 (m, 1H), 7.18-7.12 (m, 3H), 7.08-7.06 (m, 2H), 6.55 (dd,  $J$  = 15.9, 4.1 Hz, 1H), 6.39 (ddd,  $J$  = 15.8, 9.0, 5.5 Hz, 1H), 3.48 (dd,  $J$  = 16.3, 14.7 Hz, 1H), 3.32 (dd,  $J$  = 14.7, 11.1 Hz, 1H), 3.00-2.93 (m, 1H), 1.27 (dd,  $J$  = 15.9, 7.1 Hz, 3H) ppm; **<sup>13</sup>C NMR** (150 MHz, CDCl<sub>3</sub>)  $\delta$  136.6 (d,  $J$  = 2.6 Hz), 133.3 (d,  $J$  = 11.4 Hz), 131.6 (d,  $J$  = 2.7 Hz), 131.5 (d,  $J$  = 7.5 Hz), 131.2 (d,  $J$  = 8.2 Hz), 130.3 (d,  $J$  = 90.4 Hz), 129.9 (d,  $J$  = 5.0 Hz), 128.6, 128.3 (d,  $J$  = 4.4 Hz), 128.2, 128.0 (d,  $J$  = 91.1 Hz), 126.6 (d,  $J$  = 2.9 Hz), 126.3 (d,  $J$  = 1.2 Hz), 126.1 (d,  $J$  = 7.4 Hz), 38.9 (d,  $J$  = 65.6 Hz), 35.7 (d,  $J$  = 62.8 Hz), 13.8 (d,  $J$  = 3.7 Hz) ppm; **<sup>31</sup>P NMR** (243 MHz, CDCl<sub>3</sub>)  $\delta$  39.87 ppm. Another diastereomer is mixed with an unknown impurity and cannot be purified. **HRMS (ESI)** calculated  $[M+H]^+$  for C<sub>23</sub>H<sub>24</sub>OP = 347.1559, found: 347.1557.

## 5. Kinetic Resolution/Dynamic Kinetic Resolution Investigations

## Scheme S2:

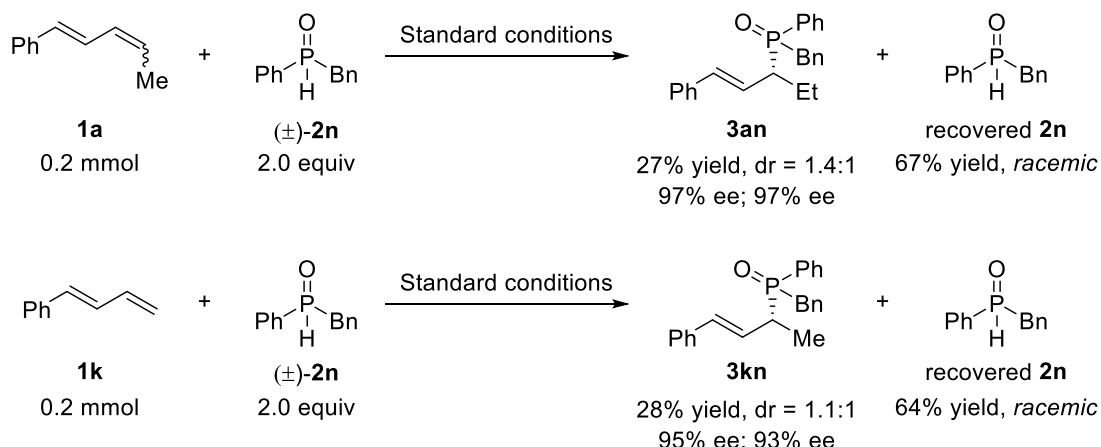

The kinetic resolution or dynamic kinetic resolution investigations were carried out with 1,3-dienes **1a** (or **1k**) and 2.0 equivalent (**±**)-**2n** under the standard conditions, the desired chiral allylic phosphine oxide products **3an** and **3kn** were obtained with a diastereomer ratio of about 1:1, and the recovered **2n** were totally racemic in both cases. Yields were calculated based on the dosage of (**±**)-**2n**, dr was determined by <sup>31</sup>P NMR analysis. The ee values of **3an**, **3kn** and recovered **2n** were determined by HPLC on Chiralpak AD-H column, hexane: isopropanol = 85:15, flow rate = 1.0 mL/min.

## 6. Scale-up Reaction and Derivatization of the Product

### Scheme S3. Scale-up reaction.

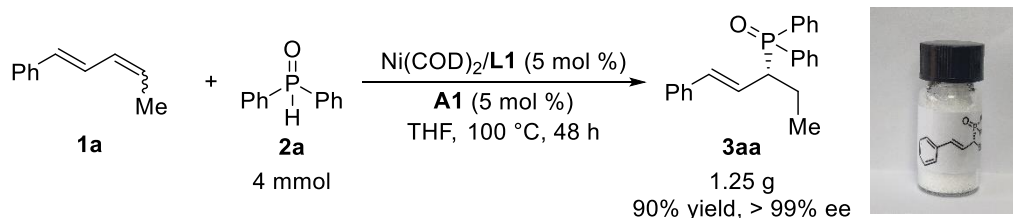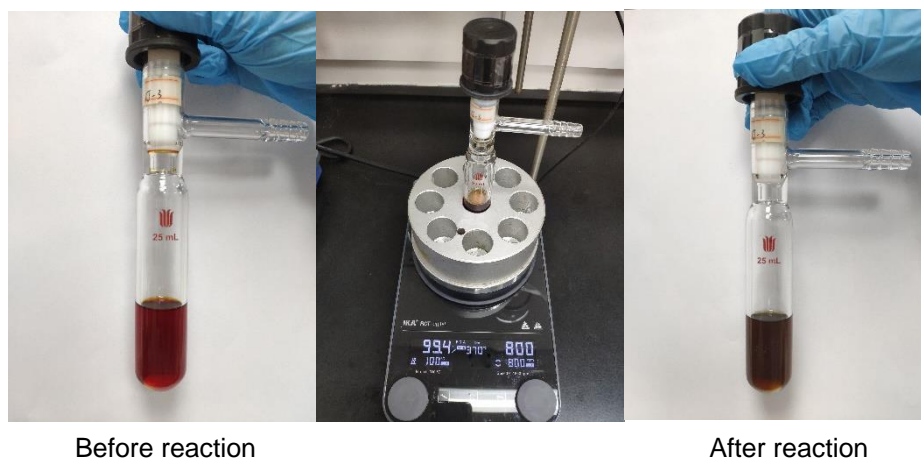

A 25 mL Schlenk tube was charged with Ni(COD)<sub>2</sub> (55.0 mg, 0.2 mmol, 0.05 equiv vs SPO), (S)-BINAP (124.5 mg, 0.2 mmol, 0.05 equiv vs SPO), TsOH·H<sub>2</sub>O (38.0 mg, 0.2 mmol, 0.05

equiv vs SPO), secondary phosphine oxides **2a** (808.8 mg, 4.0 mmol, 1.0 equiv) and 10 mL THF in an argon-filled glovebox, then 1,3-dienes **1a** (743  $\mu$ L, 4.8 mmol, 1.2 equiv vs SPO) was added. The reaction vessel was sealed and removed from the glovebox, and the mixture was stirred at 100 °C for 48 h. After complete conversion, the resulting mixture was cooled to rt, and then the residue was purified by SiO<sub>2</sub> column chromatography to give the desired product **3aa** 1.25 g (90% yield, > 99% ee), the enantiomeric excess was determined by HPLC on Chiralpak OJ-H column.

**Scheme S4.** Derivatization of the product.

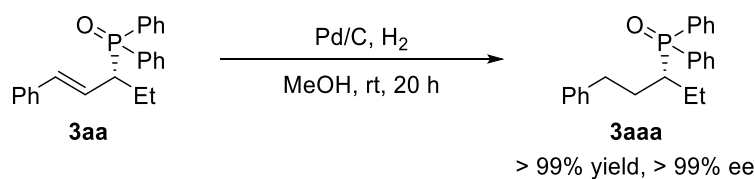

12 mg of Pd/C was added to a solution of **3aa** (69.3 mg, 0.2 mmol) in MeOH (2.0 mL). The mixture was hydrogenated under a balloon pressure of hydrogen for 20 h. The reaction progress was monitored by <sup>1</sup>H NMR analysis. The reaction mixture was filtered through celite and the filtrate was evaporated to give the crude product. The residue was purified by SiO<sub>2</sub> column chromatography to give the desired product **3aaa** as a white solid : 69.7 mg, > 99% yield; > 99% ee; m.p. 135.9-137.0 °C; [ $\alpha$ ]<sub>D</sub><sup>25</sup> = +14.5 (c = 1.0, CHCl<sub>3</sub>); The enantiomeric excess was determined by HPLC on Chiralpak OD-H column, hexane: isopropanol = 95:5, flow rate = 0.5 mL/min, UV detection at 220 nm, t<sub>R</sub> = 21.7 min (major), 23.0 min (minor); **<sup>1</sup>H NMR** (400 MHz, CDCl<sub>3</sub>)  $\delta$  7.77-7.68 (m, 4H), 7.51-7.40 (m, 6H), 7.27-7.22 (m, 2H), 7.20-7.16 (m, 1H), 7.02-6.99 (m, 2H), 2.78 (ddd, J = 14.2, 9.2, 5.4 Hz, 1H), 2.53 (ddd, J = 13.8, 9.2, 7.4 Hz, 1H), 2.25-2.17 (m, 1H), 2.03-1.88 (m, 2H), 1.86-1.75 (m, 1H), 1.74-1.60 (m, 1H), 0.97 (t, J = 7.5 Hz, 3H) ppm; **<sup>13</sup>C NMR** (100 MHz, CDCl<sub>3</sub>)  $\delta$  141.3, 132.8 (dd, J = 93.9, 20.2 Hz), 131.3 (t, J = 2.5 Hz), 130.8 (dd, J = 8.3, 3.8 Hz), 128.5, 128.4, 128.3, 125.9, 37.3 (d, J = 70.9 Hz), 33.5 (d, J = 9.7 Hz), 28.4, 20.2, 12.3 (d, J = 8.8 Hz) ppm; **<sup>31</sup>P NMR** (162 MHz, CDCl<sub>3</sub>)  $\delta$  36.84 ppm. **HRMS (ESI)** calculated [M+H]<sup>+</sup> for C<sub>23</sub>H<sub>26</sub>OP = 349.1716, found: 349.1710.

**7. Deuterium-Labeled Experiments**

**Scheme S5.** Synthesis of *d*-**2a**.<sup>[6, 7]</sup>

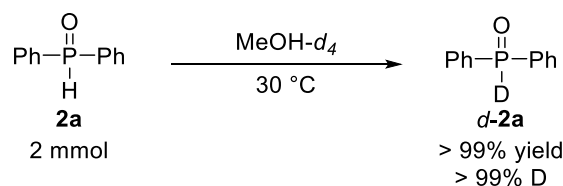

An oven dried flask (20 mL) was rinsed with MeOH-*d*<sub>4</sub> twice, and then charged with diphenylphosphine oxide (404.4 mg, 2 mmol). MeOH-*d*<sub>4</sub> (99.8 % D, 2 mL) was added and the

mixture was concentrated using rotatory evaporator (400 mbar) for 6 minutes (This process was repeated six times); The residual solvent was evaporated with high vacuum and resulted in quantitative (>99%) yield of the title compound **d-2a**.  $^1\text{H NMR}$  spectrum showed > 99% D incorporation.  $^1\text{H NMR}$  (400 MHz,  $\text{MeOH-}d_4$ )  $\delta$  7.76-7.70 (m, 4H), 7.67-7.62 (m, 2H), 7.59-7.54 (m, 4H) ppm.

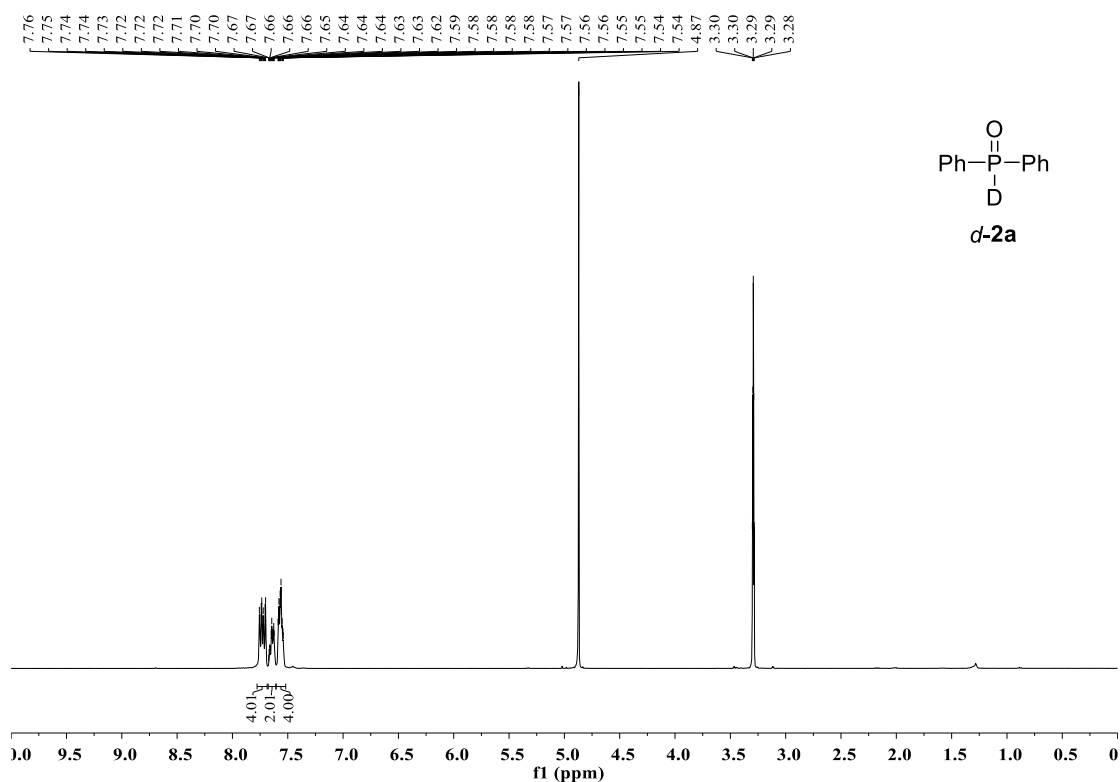

**Figure S5.**  $^1\text{H NMR}$  spectra of **d-2a**.

**Scheme S6.** Synthesis of **d-3ba** and **d-3la**.

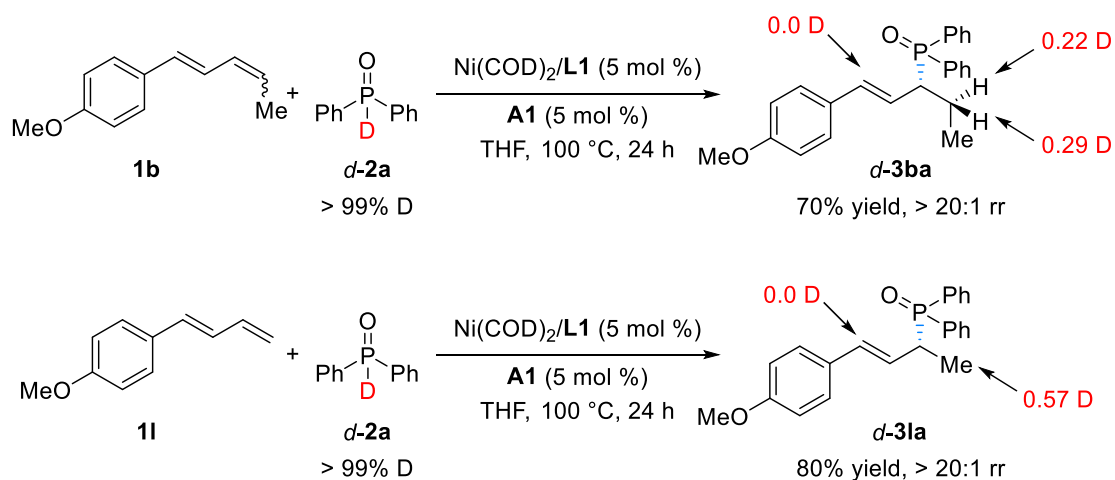

A reaction tube was charged with  $\text{Ni}(\text{COD})_2$  (2.8 mg, 0.01 mmol, 0.05 equiv vs SPO), (S)-BINAP (6.3 mg, 0.01 mmol, 0.05 equiv vs SPO),  $\text{TsOH}\cdot\text{H}_2\text{O}$  (1.9 mg, 0.01 mmol, 0.05 equiv vs SPO), **d-2a** (40.6 mg, 0.2 mmol, 1.0 equiv) and 1.0 mL THF in an argon-filled glovebox, then

1,3-diene **1b** or **1l** (0.24 mmol, 1.2 equiv vs SPO) was added. The reaction vessel was sealed using a PTFE septum and removed from the glovebox, and the mixture was stirred at 100 °C for 24 h. After complete conversion, the resulting mixture was cooled to rt, and the crude product was used to determine the regioselectivity by  $^{31}\text{P}$  NMR analysis. Then the residue was purified by  $\text{SiO}_2$  column chromatography to give the desired product *d*-**3ba** (White solid, 70% yield, >20:1 rr) or *d*-**3la** (White solid, 80% yield, >20:1 rr). The *d*-**3ba** and *d*-**3la** were determined by  $^1\text{H}$  NMR and  $^2\text{H}$  NMR analysis. Deuterium incorporation was determined by  $^1\text{H}$  NMR. Percent deuterium (% D) incorporation is depicted as the amount of deuterium in place of a single hydrogen atom at that site.

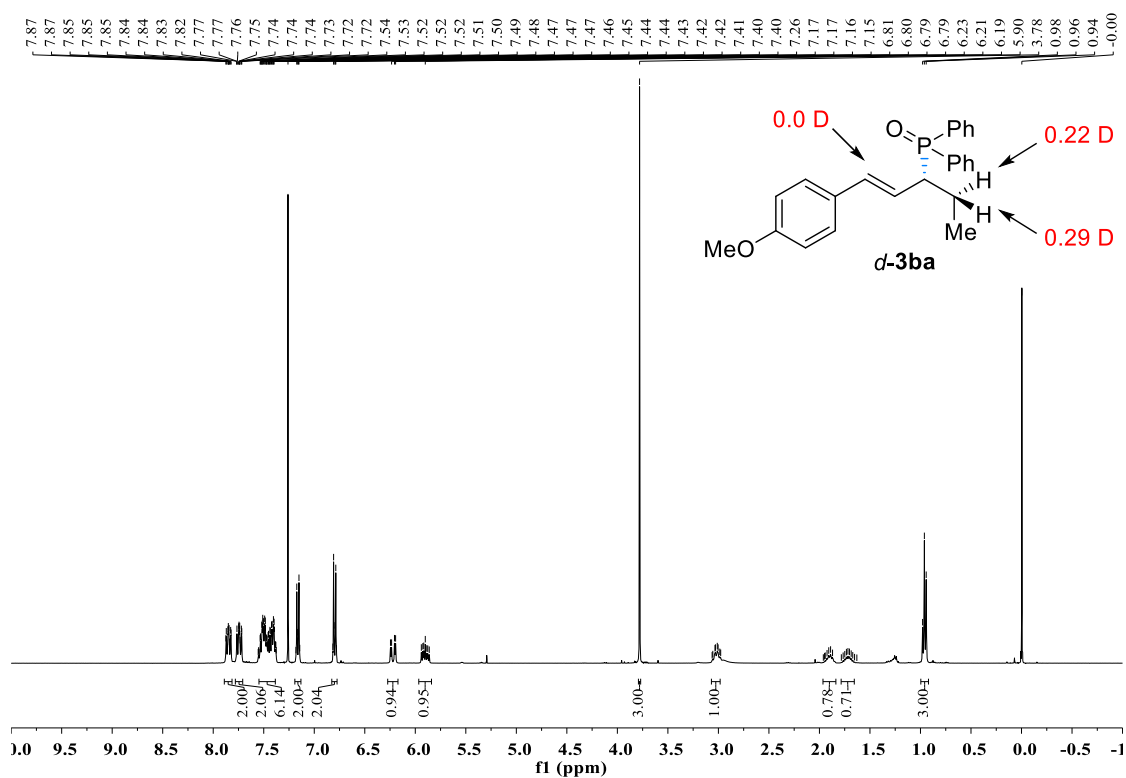

Figure S6.  $^1\text{H}$  NMR spectra of *d*-**3ba**.

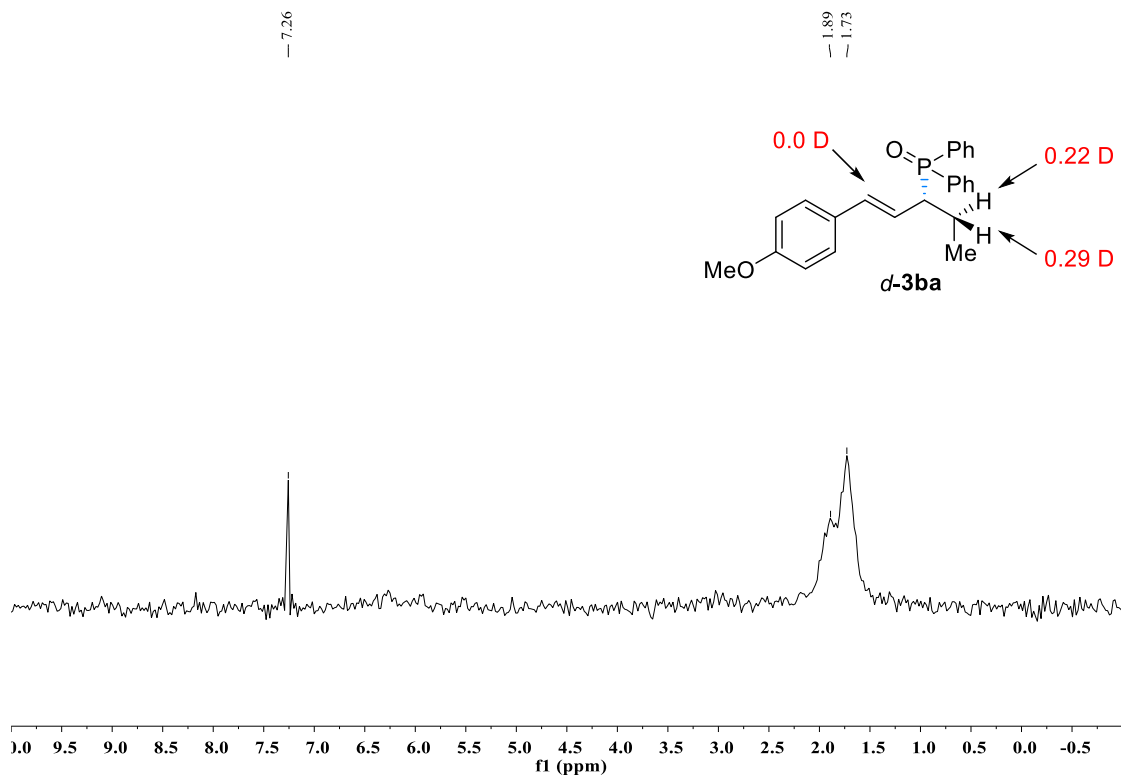

**Figure S7.**  $^2\text{H}$  NMR spectra of *d-3ba*.

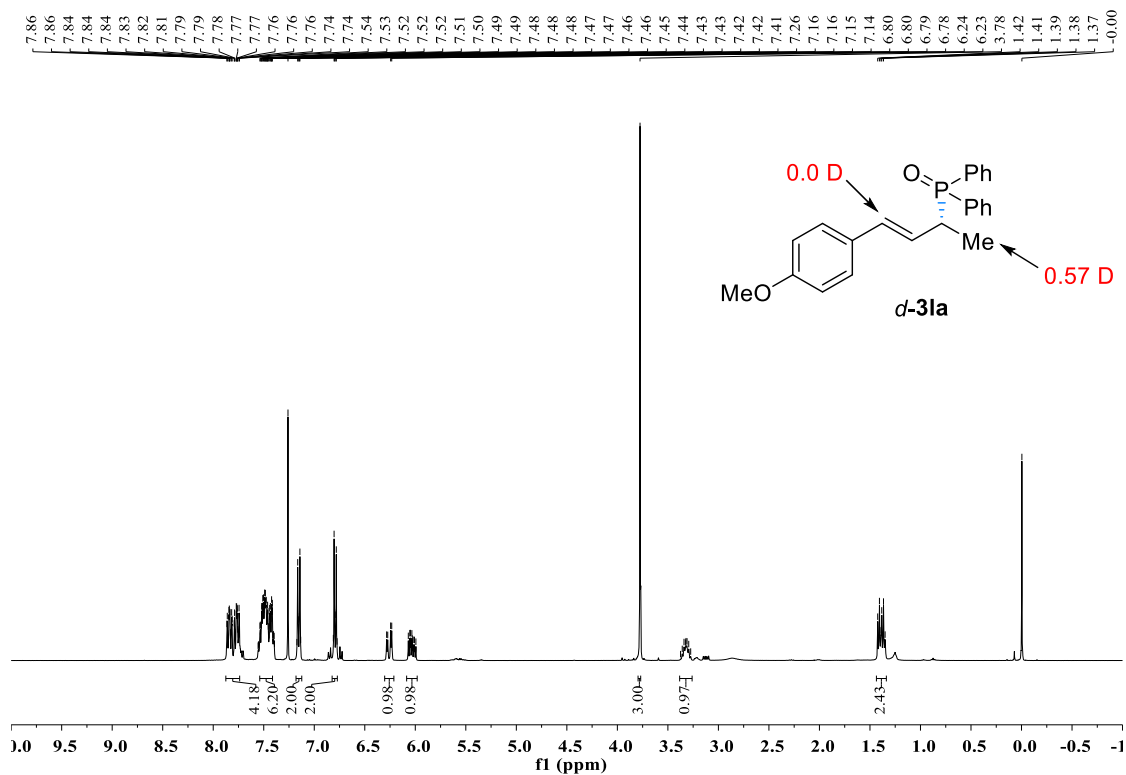

**Figure S8.**  $^1\text{H}$  NMR spectra of *d-31a*.

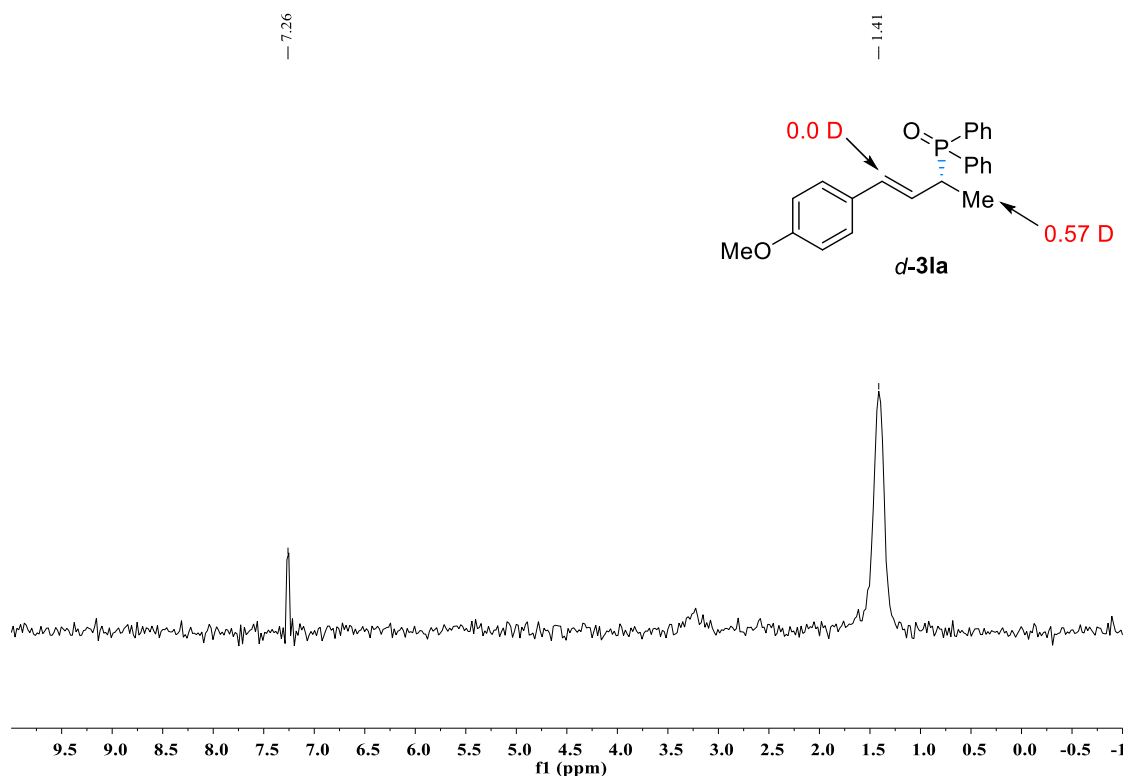

Figure S9.  $^2\text{H}$  NMR spectra of *d*-**3la**.

## 8. Cross-Over Experiments

### Scheme S7:

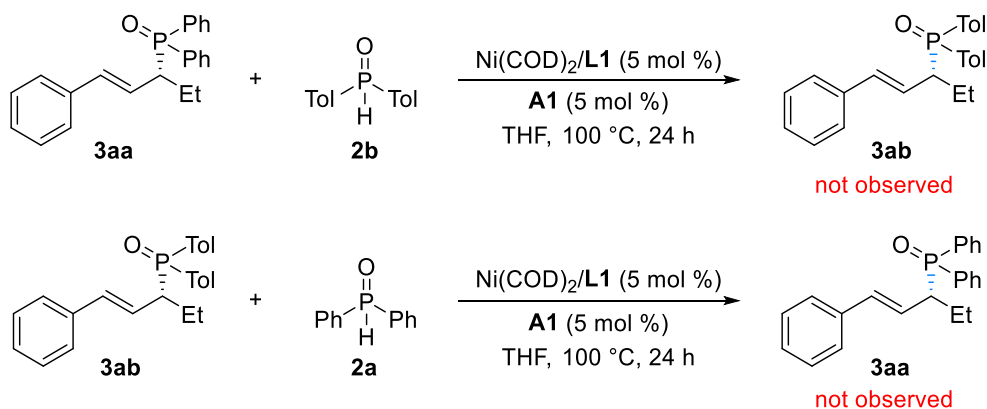

A reaction tube was charged with  $\text{Ni}(\text{COD})_2$  (1.4 mg, 0.005 mmol, 0.05 equiv vs SPO), (*S*)-BINAP (3.2 mg, 0.005 mmol, 0.05 equiv vs SPO),  $\text{TsOH}\cdot\text{H}_2\text{O}$  (1.0 mg, 0.005 mmol, 0.05 equiv vs SPO), **2b** (or **2a**) (0.1 mmol, 1.0 equiv) and **3aa** (or **3ab**) (0.1 mmol, 1.0 equiv) in an argon-filled glovebox, then 1.0 mL THF was added. The reaction vessel was sealed using a PTFE septum and removed from the glovebox, and the mixture was stirred at 100 °C for 24 h. Then the resulting mixture was cooled to rt, we observe no reactivity, but rather remaining starting materials (determined by  $^{31}\text{P}$  NMR analysis).

## 9. Reaction Profiles

### Scheme S8:

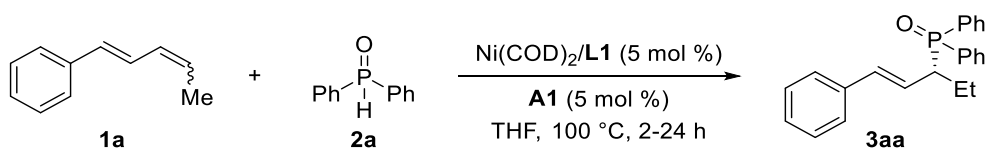

A reaction tube was charged with  $\text{Ni}(\text{COD})_2$  (2.8 mg, 0.01 mmol, 0.05 equiv vs **2a**), (S)-BINAP (0.01 mmol, 0.05 equiv vs **2a**),  $\text{TsOH}\cdot\text{H}_2\text{O}$  (0.01 mmol, 0.05 equiv vs **2a**), Diphenylphosphine oxide **2a** (0.2 mmol, 1.0 equiv) and 1.0 mL THF in an argon-filled glovebox, then 1,3-diene **1a** (38  $\mu\text{L}$ , 0.24 mmol, 1.2 equiv vs **2a**) was added. The reaction vessel was sealed using a PTFE septum and removed from the glovebox, and the mixture was stirred at 100 °C for 24 h. The reaction progress was monitored by GC with naphthalene as the internal standard. The ee values were determined by HPLC on a chiral stationary phase.

**Table S5.** Reaction Profiles.

| Entry | Time (h) | Yield (%) | ee (%) |
|-------|----------|-----------|--------|
| 1     | 2        | 69        | 99     |
| 2     | 4        | 87        | 99     |
| 3     | 6        | 91        | 99     |
| 4     | 8        | 97        | 99     |
| 5     | 10       | 98        | 99     |
| 6     | 11       | 98        | 99     |
| 7     | 12       | 98        | 99     |
| 8     | 24       | 98        | 99     |



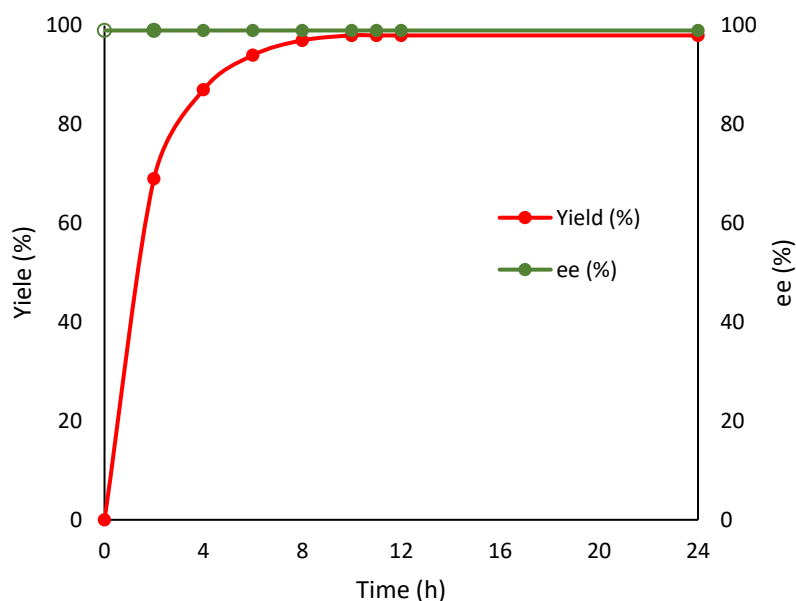

## 10. DFT Calculation

**Computational Methods:** All of the density functional theory (DFT) calculations were performed with the Gaussian 09 series of programs.<sup>[8]</sup> The B3-LYP functional<sup>[9, 10]</sup> with the standard 6-31G(d) basis set (LANL08(f) basis set for Ni) was used for the geometry optimizations in the gas phase. Harmonic vibrational frequency calculations were performed for all of the stationary points to determine whether they are local minima or transition structures and to derive the thermochemical corrections for the enthalpies and free energies. The M06 functional<sup>[11]</sup> proposed by Truhlar *et al.* with the 6-311+G(d,p) basis set (LANL08(f) basis set for Ni) was used to calculate the single-point energies in THF solvent to provide more accurate energy information. The solvent effect was considered by single-point calculations based on the gas-phase stationary points with the SMD<sup>[12, 13]</sup> continuum solvation model. The Gibbs free energies of the stationary points calculated using the M06 functional are used to discuss the energies. The 3D images of the calculated structures were prepared using CYLview.<sup>[14]</sup>

In this hydrophosphinylation reaction, high enantioselectivity was observed regardless of the *E,Z/E,E* ratio of the starting 1,3-dienes. To explore the origin of the enantioselectivity, we calculated the energies of the transition states of the diene insertion step for reaction of (*E,Z*)-**1a** and (*E,E*)-**1a** to afford (*R*)-**3aa** and (*S*)-**3aa**, respectively. Comparison of the energies of transition states **TS-1** and **TS-3** indicated that the formation of (*R*)-**3aa** was favored over the formation of (*S*)-**3aa** by 5.2 kcal/mol. Comparison of the energies of transition states **TS-2** and **TS-4** indicated that the formation of (*R*)-**3aa** was favored over the formation of (*S*)-**3aa** by 4.5 kcal/mol. Thus, both (*E,Z*)-**1a** and (*E,E*)-**1a** underwent the enantiodetermining step to give (*R*)-**3aa** as the predominant product.

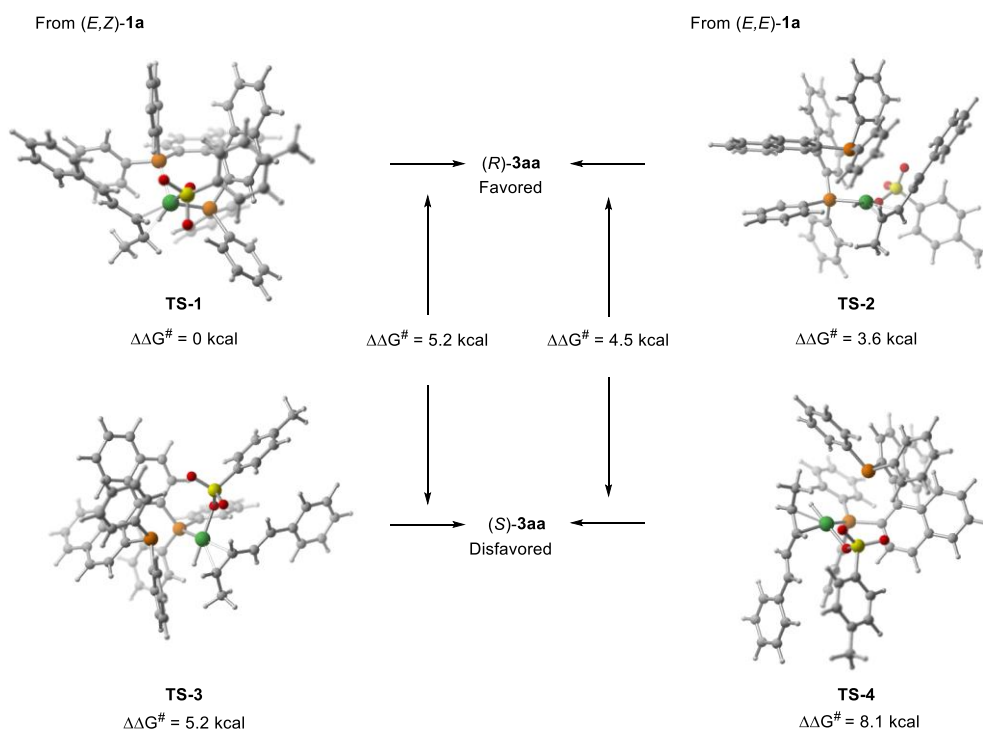

**Figure S10.** Calculated energies of transition states of diene insertion step for reactions of (*E,Z*)-1a and (*E,E*)-1a.

Cartesian coordinates of the calculated transition states.

**TS-1**

Thermal Correction to Free Energy: 0.858325 Hartree

SCF energy: -3868.542788 Hartree

Gibbs free energy: -3867.684463 Hartree

Coordinates:

|   |             |             |            |
|---|-------------|-------------|------------|
| C | -2.76980100 | 1.90276700  | 4.81608900 |
| C | -3.02224300 | 2.48698800  | 3.59711600 |
| C | -2.80331300 | 1.77598800  | 2.38628700 |
| C | -2.31795300 | 0.42861500  | 2.43065100 |
| C | -2.06614600 | -0.14017000 | 3.71314500 |
| C | -2.28151100 | 0.57569300  | 4.86926800 |
| H | -3.42737400 | 3.39096300  | 1.08720500 |
| H | -2.93844400 | 2.45574000  | 5.73628700 |
| H | -3.38981900 | 3.50845700  | 3.53633000 |
| C | -3.06005100 | 2.36902800  | 1.12730200 |
| C | -2.10175100 | -0.30019900 | 1.20465300 |
| H | -1.68676900 | -1.15258600 | 3.77731300 |
| H | -2.07143600 | 0.11770700  | 5.83203600 |

|   |             |             |             |
|---|-------------|-------------|-------------|
| C | -2.32654000 | 0.34336700  | -0.01863500 |
| C | -2.81122200 | 1.68134700  | -0.03193700 |
| C | -1.79535700 | -1.77194200 | 1.33782900  |
| C | -2.89864100 | -2.60860800 | 1.75637000  |
| C | -0.52945800 | -2.34128200 | 1.16431400  |
| C | -4.22099300 | -2.10477900 | 1.93464600  |
| C | -2.68964300 | -4.00443500 | 1.99760600  |
| C | -0.35083600 | -3.73068200 | 1.43609900  |
| C | -5.25843900 | -2.92643200 | 2.31743200  |
| H | -4.41454400 | -1.05280200 | 1.76367900  |
| C | -3.77739400 | -4.82723200 | 2.39607900  |
| C | -1.38642600 | -4.53326000 | 1.83972900  |
| C | -5.03951800 | -4.30425400 | 2.55359000  |
| H | -6.25431800 | -2.51009700 | 2.44391000  |
| H | -3.58885900 | -5.88337000 | 2.57419000  |
| H | -1.21366400 | -5.58702700 | 2.04634100  |
| H | -5.86508200 | -4.94106400 | 2.85969800  |
| H | 0.63404900  | -4.16687500 | 1.32830000  |
| H | -2.97688900 | 2.17329700  | -0.98262800 |
| P | 0.92982900  | -1.34173200 | 0.55141100  |
| P | -1.70367100 | -0.31645400 | -1.63158700 |
| C | 1.54260900  | -0.51029800 | 2.08003000  |
| C | 1.42590600  | -1.08586100 | 3.35656800  |
| C | 2.18811900  | 0.72759300  | 1.94311500  |
| C | 1.94720000  | -0.43494900 | 4.47478500  |
| H | 0.93175500  | -2.04598500 | 3.47667900  |
| C | 2.71385300  | 1.37273300  | 3.06581800  |
| H | 2.27386300  | 1.19677400  | 0.97008400  |
| C | 2.59331600  | 0.79605200  | 4.33073600  |
| H | 1.85042400  | -0.88924200 | 5.45773100  |
| H | 3.21477300  | 2.32884300  | 2.94064200  |
| H | 2.99976300  | 1.30163200  | 5.20309400  |
| C | 2.20790000  | -2.65669500 | 0.26255300  |
| C | 3.40428500  | -2.73175700 | 0.98922200  |
| C | 2.00700900  | -3.57101400 | -0.78893000 |
| C | 4.36951200  | -3.69480100 | 0.67746700  |
| H | 3.59302600  | -2.03556100 | 1.79882400  |
| C | 2.96258200  | -4.54053300 | -1.08958700 |

|    |             |             |             |
|----|-------------|-------------|-------------|
| H  | 1.08710400  | -3.53151000 | -1.36670300 |
| C  | 4.15285700  | -4.60348400 | -0.35770400 |
| H  | 5.29243700  | -3.72795400 | 1.25008900  |
| H  | 2.78007700  | -5.24516700 | -1.89714500 |
| H  | 4.90176100  | -5.35436400 | -0.59510600 |
| C  | -2.49248400 | 0.71905300  | -2.95077700 |
| C  | -3.79213000 | 0.48817900  | -3.43213200 |
| C  | -1.73643900 | 1.76231700  | -3.51125900 |
| C  | -4.32479800 | 1.28695900  | -4.44424900 |
| H  | -4.38962700 | -0.32255200 | -3.02868800 |
| C  | -2.27610600 | 2.56145300  | -4.52249200 |
| H  | -0.73326100 | 1.97187700  | -3.15361400 |
| C  | -3.56855900 | 2.32605900  | -4.99220400 |
| H  | -5.33080800 | 1.09321500  | -4.80757800 |
| H  | -1.67552200 | 3.36523600  | -4.93972300 |
| H  | -3.98488700 | 2.94418000  | -5.78349300 |
| C  | -2.48720400 | -1.96119800 | -1.91740000 |
| C  | -1.81353600 | -2.90859500 | -2.70334600 |
| C  | -3.77210600 | -2.27212300 | -1.44623700 |
| C  | -2.40930800 | -4.13206300 | -3.01386900 |
| H  | -0.81810000 | -2.68652000 | -3.07672600 |
| C  | -4.36527400 | -3.49853100 | -1.74907400 |
| H  | -4.30785200 | -1.55871700 | -0.82891200 |
| C  | -3.68636100 | -4.43065700 | -2.53575500 |
| H  | -1.87312100 | -4.85276000 | -3.62575500 |
| H  | -5.35489300 | -3.72554500 | -1.36242500 |
| H  | -4.14813600 | -5.38569200 | -2.77150500 |
| Ni | 0.57750900  | -0.05801600 | -1.52394600 |
| C  | 2.47453800  | 0.35003500  | -2.47748000 |
| H  | 2.33678900  | 1.42399700  | -2.54492400 |
| C  | 3.68160800  | -0.10388600 | -1.80982600 |
| H  | 3.90879600  | -1.16677400 | -1.84111000 |
| C  | 4.52472500  | 0.75271400  | -1.18314700 |
| H  | 4.22593500  | 1.79824900  | -1.13072600 |
| C  | 1.70765100  | -0.42533700 | -3.37641200 |
| C  | 5.79496500  | 0.43043200  | -0.53321700 |
| C  | 6.40968000  | -0.83716000 | -0.59945100 |
| C  | 6.45555900  | 1.44349300  | 0.19011800  |

|   |             |             |             |
|---|-------------|-------------|-------------|
| C | 7.62319200  | -1.07744100 | 0.03831000  |
| H | 5.93754800  | -1.63796900 | -1.16013100 |
| C | 7.66997200  | 1.20197400  | 0.82953900  |
| H | 5.99831200  | 2.42829000  | 0.24752100  |
| C | 8.26077900  | -0.06102600 | 0.75771700  |
| H | 8.08039100  | -2.06162400 | -0.03087900 |
| H | 8.15648200  | 2.00140500  | 1.38256300  |
| H | 9.20996900  | -0.25215900 | 1.25132400  |
| O | 0.35419800  | 1.73032200  | -0.64206000 |
| S | 1.02978100  | 3.06275400  | -0.99508100 |
| O | 0.95720100  | 3.34069900  | -2.45027000 |
| O | 2.37178600  | 3.16866800  | -0.37945400 |
| C | -0.00698100 | 4.28162900  | -0.17426800 |
| C | -0.89757800 | 5.05096900  | -0.92195100 |
| C | 0.09606200  | 4.45836700  | 1.20688000  |
| C | -1.69167000 | 6.00100400  | -0.27791900 |
| H | -0.95332000 | 4.90838100  | -1.99568100 |
| C | -0.70326800 | 5.41005300  | 1.83653000  |
| H | 0.79629700  | 3.85881200  | 1.77900400  |
| C | -1.60545400 | 6.19929400  | 1.10678700  |
| H | -2.38269400 | 6.60439500  | -0.86273300 |
| H | -0.62250400 | 5.54621600  | 2.91269500  |
| C | -2.43431200 | 7.26172000  | 1.79157500  |
| H | -3.37692300 | 7.43976700  | 1.26275800  |
| H | -2.67094100 | 6.98425000  | 2.82466900  |
| H | -1.89758100 | 8.21928700  | 1.82922600  |
| H | 1.04534000  | 0.14691700  | -4.02442600 |
| C | 2.18874800  | -1.72648200 | -3.99858500 |
| H | 2.91286100  | -1.49296100 | -4.79012000 |
| H | 2.67629500  | -2.38644400 | -3.27818500 |
| H | 1.36127500  | -2.27641800 | -4.46035800 |
| H | 0.64647800  | -1.23476200 | -2.41287700 |

Cartesian coordinates of the calculated transition states.

### TS-2

Thermal Correction to Free Energy: 0.855774 Hartree

SCF energy: -3868.534947 Hartree

Gibbs free energy: -3867.679173 Hartree

Coordinates:

|   |            |             |             |
|---|------------|-------------|-------------|
| C | 3.02596400 | 0.99776700  | 5.39517000  |
| C | 2.18555800 | -0.05161300 | 5.10631200  |
| C | 1.97308000 | -0.46872300 | 3.76498200  |
| C | 2.64410900 | 0.20641600  | 2.69431700  |
| C | 3.49443100 | 1.29892900  | 3.03348400  |
| C | 3.68151500 | 1.68007100  | 4.34341900  |
| H | 0.53284600 | -2.01701300 | 4.25031800  |
| H | 3.18184400 | 1.30978700  | 6.42439600  |
| H | 1.66337100 | -0.58018300 | 5.90003100  |
| C | 1.09276400 | -1.53241100 | 3.45562400  |
| C | 2.43872700 | -0.22143900 | 1.32981900  |
| H | 3.99887700 | 1.84387300  | 2.24517400  |
| H | 4.33506900 | 2.51807100  | 4.57032500  |
| C | 1.59890200 | -1.31110800 | 1.07691800  |
| C | 0.91114800 | -1.93708000 | 2.15950900  |
| C | 3.17445200 | 0.54667200  | 0.26541700  |
| C | 4.58578200 | 0.31554800  | 0.11016300  |
| C | 2.54426300 | 1.54747300  | -0.47970500 |
| C | 5.28543900 | -0.67651800 | 0.85521300  |
| C | 5.33433700 | 1.09930800  | -0.82641000 |
| C | 3.31906600 | 2.32946100  | -1.38384200 |
| C | 6.63548000 | -0.88491100 | 0.67697600  |
| H | 4.74106000 | -1.27272900 | 1.57908700  |
| C | 6.72465200 | 0.85802800  | -0.99143300 |
| C | 4.66384500 | 2.11239900  | -1.55549500 |
| C | 7.36645200 | -0.11313200 | -0.25773200 |
| H | 7.14523500 | -1.64589500 | 1.26206200  |
| H | 7.27441400 | 1.46286900  | -1.70890800 |
| H | 5.23302200 | 2.72676800  | -2.24977500 |
| H | 8.43132100 | -0.28599700 | -0.38841200 |
| H | 2.83625500 | 3.11692900  | -1.95075100 |
| H | 0.19719000 | -2.72464000 | 1.96221200  |
| P | 0.69691400 | 1.77661800  | -0.31624000 |
| P | 1.04977800 | -1.91239000 | -0.58730900 |
| C | 0.53539700 | 2.81149000  | 1.20497300  |
| C | 1.35043100 | 3.92339000  | 1.47941000  |

|   |             |             |             |
|---|-------------|-------------|-------------|
| C | -0.45199300 | 2.44133200  | 2.13132300  |
| C | 1.17273200  | 4.65795700  | 2.65093400  |
| H | 2.12609100  | 4.21443100  | 0.77571400  |
| C | -0.62478000 | 3.17972200  | 3.30604100  |
| H | -1.07870600 | 1.57209900  | 1.94624500  |
| C | 0.18287400  | 4.28647000  | 3.56623500  |
| H | 1.80759900  | 5.51732400  | 2.85252000  |
| H | -1.38866200 | 2.87903200  | 4.01795900  |
| H | 0.04819300  | 4.85751600  | 4.48148800  |
| C | 0.31230900  | 2.96197300  | -1.68755000 |
| C | -0.32940500 | 4.19050000  | -1.47168600 |
| C | 0.54123000  | 2.56044500  | -3.01895400 |
| C | -0.71477100 | 4.99714900  | -2.54645300 |
| H | -0.53788400 | 4.52115700  | -0.46019700 |
| C | 0.16748300  | 3.37018400  | -4.09104200 |
| H | 1.03769400  | 1.61402600  | -3.21729200 |
| C | -0.46559700 | 4.59493000  | -3.85820300 |
| H | -1.21492800 | 5.94159200  | -2.35009800 |
| H | 0.37132100  | 3.04552500  | -5.10868900 |
| H | -0.76082400 | 5.22603400  | -4.69233300 |
| C | 0.85565900  | -3.74239800 | -0.38770200 |
| C | 1.66358700  | -4.52246400 | 0.45403900  |
| C | -0.10735200 | -4.38305400 | -1.18050200 |
| C | 1.51420700  | -5.90907200 | 0.49481800  |
| H | 2.39494700  | -4.04870200 | 1.10136100  |
| C | -0.25116400 | -5.77087700 | -1.14557200 |
| H | -0.75488800 | -3.78824900 | -1.81807200 |
| C | 0.55975900  | -6.53738200 | -0.30744000 |
| H | 2.14195500  | -6.49743800 | 1.15874000  |
| H | -1.00310400 | -6.25072300 | -1.76653100 |
| H | 0.44379600  | -7.61730700 | -0.27286900 |
| C | 2.47023000  | -1.86180100 | -1.77434100 |
| C | 2.32763600  | -1.25235500 | -3.02784800 |
| C | 3.67333800  | -2.52798500 | -1.48830900 |
| C | 3.35940600  | -1.29650800 | -3.96825000 |
| H | 1.40010000  | -0.74572800 | -3.27321900 |
| C | 4.70463000  | -2.57132300 | -2.42430900 |
| H | 3.81095400  | -3.01695400 | -0.53038000 |

|    |             |             |             |
|----|-------------|-------------|-------------|
| C  | 4.55070100  | -1.95598300 | -3.66864700 |
| H  | 3.22780900  | -0.81590400 | -4.93412900 |
| H  | 5.63062600  | -3.08328700 | -2.17851000 |
| H  | 5.35450300  | -1.99275100 | -4.39900000 |
| Ni | -0.95316200 | -1.00409300 | -1.12552000 |
| C  | -2.80366300 | -0.36770600 | -1.87168700 |
| H  | -3.33762600 | -1.29334400 | -1.65684900 |
| C  | -3.28752700 | 0.82144700  | -1.16489700 |
| H  | -3.63000700 | 0.63781800  | -0.15251400 |
| C  | -3.37987800 | 2.06807100  | -1.67571200 |
| H  | -3.09764400 | 2.24427100  | -2.71338700 |
| C  | -1.94925800 | -0.36165500 | -2.97656300 |
| H  | -1.60627600 | 0.60582500  | -3.33988600 |
| C  | -3.88911600 | 3.24256700  | -0.95834900 |
| C  | -4.01291400 | 3.28277900  | 0.44534900  |
| C  | -4.27597700 | 4.38110300  | -1.69001800 |
| C  | -4.52282100 | 4.41208600  | 1.08080700  |
| H  | -3.68828600 | 2.43334600  | 1.03925400  |
| C  | -4.78784300 | 5.50999200  | -1.05228500 |
| H  | -4.17624000 | 4.37111400  | -2.77301600 |
| C  | -4.91642100 | 5.52981800  | 0.33800900  |
| H  | -4.60384500 | 4.42455400  | 2.16467400  |
| H  | -5.08620200 | 6.37418000  | -1.64071700 |
| H  | -5.31121800 | 6.40943200  | 0.83957900  |
| C  | -1.93041400 | -1.48064200 | -3.99258700 |
| H  | -2.61740800 | -1.23477600 | -4.81459700 |
| H  | -0.93634200 | -1.63038100 | -4.42642400 |
| H  | -2.26166200 | -2.42702700 | -3.55365100 |
| H  | -0.28536700 | -0.45702100 | -2.31105700 |
| O  | -1.75973000 | -1.96329100 | 0.36358500  |
| S  | -2.61293700 | -1.62514600 | 1.59953200  |
| O  | -2.72811400 | -0.16685100 | 1.83040400  |
| O  | -2.18237000 | -2.44994900 | 2.74085200  |
| C  | -4.25316800 | -2.20354900 | 1.12868200  |
| C  | -5.37190000 | -1.41615000 | 1.39304200  |
| C  | -4.40217200 | -3.47052100 | 0.55344600  |
| C  | -6.64366000 | -1.89375700 | 1.06678100  |
| H  | -5.24194600 | -0.43982700 | 1.84772800  |



|   |             |             |             |
|---|-------------|-------------|-------------|
| C | -5.67525300 | -3.93267900 | 0.23254300  |
| H | -3.52634300 | -4.08212800 | 0.36031700  |
| C | -6.81695000 | -3.15262900 | 0.48135300  |
| H | -7.51421100 | -1.27508200 | 1.27205000  |
| H | -5.78881100 | -4.91781800 | -0.21535500 |
| C | -8.19120900 | -3.66317900 | 0.11490600  |
| H | -8.97771000 | -3.00835500 | 0.50300800  |
| H | -8.31742400 | -3.72336300 | -0.97402200 |
| H | -8.36387800 | -4.66994900 | 0.51401500  |

Cartesian coordinates of the calculated transition states.

### TS-3

Thermal Correction to Free Energy: 0.855630 Hartree

SCF energy: -3868.532399 Hartree

Gibbs free energy: -3867.676769 Hartree

Coordinates:

|   |             |             |             |
|---|-------------|-------------|-------------|
| C | -2.97074400 | 4.55491400  | -3.01516900 |
| C | -1.81660100 | 3.89673800  | -3.36934500 |
| C | -1.53333100 | 2.59934400  | -2.86561000 |
| C | -2.46402600 | 1.95786000  | -1.98645200 |
| C | -3.64693400 | 2.67379600  | -1.64006100 |
| C | -3.88944800 | 3.93531200  | -2.13527500 |
| H | 0.35864300  | 2.39051300  | -3.89268900 |
| H | -3.17542000 | 5.55039900  | -3.39987200 |
| H | -1.09344100 | 4.36281800  | -4.03415400 |
| C | -0.34704800 | 1.91450800  | -3.21648400 |
| C | -2.18703900 | 0.63625800  | -1.47598500 |
| H | -4.35694500 | 2.22670500  | -0.95487000 |
| H | -4.79249900 | 4.46266800  | -1.84059200 |
| C | -0.97454300 | 0.01686400  | -1.80900800 |
| C | -0.07168200 | 0.67997300  | -2.69087800 |
| C | -3.31107600 | -0.03241600 | -0.72373500 |
| C | -4.41937400 | -0.52302000 | -1.50944000 |
| C | -3.37298300 | -0.09459000 | 0.66828500  |
| C | -4.44366400 | -0.45669400 | -2.93297100 |
| C | -5.55049100 | -1.10841500 | -0.85490200 |
| C | -4.52068100 | -0.66651700 | 1.29268200  |

|   |             |             |             |
|---|-------------|-------------|-------------|
| C | -5.50739200 | -0.95029500 | -3.65702300 |
| H | -3.60829200 | -0.00534400 | -3.45571300 |
| C | -6.63211800 | -1.60980700 | -1.62747400 |
| C | -5.56830900 | -1.16339000 | 0.56125200  |
| C | -6.61570200 | -1.53650600 | -3.00135300 |
| H | -5.49735000 | -0.88230100 | -4.74164200 |
| H | -7.47892100 | -2.05142900 | -1.10720900 |
| H | -6.43293100 | -1.59361300 | 1.06181600  |
| H | -7.45021700 | -1.91950600 | -3.58250100 |
| H | -4.56590600 | -0.70986200 | 2.37477000  |
| H | 0.86027900  | 0.19500700  | -2.95252700 |
| P | -1.98406900 | 0.64388400  | 1.67120600  |
| P | -0.25140700 | -1.47117000 | -0.96598900 |
| C | -2.61154600 | 2.37092900  | 1.93306600  |
| C | -3.90690000 | 2.65628400  | 2.40135300  |
| C | -1.74450800 | 3.43155800  | 1.63266800  |
| C | -4.32340600 | 3.97542900  | 2.57081100  |
| H | -4.59292100 | 1.84659500  | 2.63403500  |
| C | -2.16700000 | 4.75402200  | 1.80630300  |
| H | -0.75054500 | 3.22844100  | 1.24407300  |
| C | -3.45102900 | 5.02833700  | 2.27418900  |
| H | -5.32702200 | 4.18360700  | 2.93389000  |
| H | -1.48566400 | 5.56607100  | 1.56711900  |
| H | -3.77693800 | 6.05718800  | 2.40652300  |
| C | -2.24081900 | -0.11681100 | 3.34322600  |
| C | -2.11196000 | 0.65508100  | 4.51042900  |
| C | -2.39209500 | -1.50978300 | 3.48642100  |
| C | -2.14969500 | 0.05965200  | 5.77373200  |
| H | -1.98497500 | 1.73031400  | 4.43372000  |
| C | -2.44527400 | -2.10166200 | 4.74932200  |
| H | -2.47951300 | -2.13764500 | 2.60354300  |
| C | -2.32265400 | -1.31921100 | 5.90035800  |
| H | -2.04990800 | 0.68055400  | 6.66033900  |
| H | -2.58279700 | -3.17711400 | 4.83318200  |
| H | -2.36058600 | -1.78022000 | 6.88369500  |
| C | 1.03031300  | -2.12139800 | -2.14851800 |
| C | 0.68439400  | -2.80160000 | -3.32823900 |
| C | 2.39075500  | -1.95426100 | -1.84111500 |

|    |             |             |             |
|----|-------------|-------------|-------------|
| C  | 1.67169600  | -3.29727700 | -4.17915800 |
| H  | -0.35763900 | -2.95920700 | -3.58441600 |
| C  | 3.37775600  | -2.45608900 | -2.69404900 |
| H  | 2.68212100  | -1.41304300 | -0.94826400 |
| C  | 3.02200500  | -3.12802900 | -3.86320400 |
| H  | 1.38428200  | -3.82155500 | -5.08686200 |
| H  | 4.42433400  | -2.31851500 | -2.43609300 |
| H  | 3.79020000  | -3.52044300 | -4.52447700 |
| C  | -1.47804700 | -2.84964100 | -0.97837300 |
| C  | -1.41290000 | -3.82831800 | 0.02490300  |
| C  | -2.40464500 | -3.01793300 | -2.01843900 |
| C  | -2.25277600 | -4.94271300 | -0.00859900 |
| H  | -0.69741400 | -3.71936700 | 0.83375600  |
| C  | -3.25118700 | -4.12683300 | -2.04801700 |
| H  | -2.48201600 | -2.27314200 | -2.80237100 |
| C  | -3.17683600 | -5.09316200 | -1.04364200 |
| H  | -2.18585200 | -5.69062700 | 0.77719400  |
| H  | -3.97411800 | -4.22606800 | -2.85281900 |
| H  | -3.83652700 | -5.95644300 | -1.06632600 |
| Ni | 0.81610400  | -0.89430700 | 0.93636700  |
| C  | 2.18181100  | -0.96025500 | 2.53994200  |
| H  | 2.18753500  | 0.10552100  | 2.75605300  |
| C  | 3.42766600  | -1.53811700 | 2.05745600  |
| H  | 3.45954300  | -2.61673600 | 1.91710100  |
| C  | 4.52462300  | -0.79506000 | 1.78171400  |
| H  | 4.44299400  | 0.28342100  | 1.90499900  |
| C  | 1.08603100  | -1.71659000 | 2.97930300  |
| H  | 0.33299500  | -1.17401900 | 3.54467400  |
| C  | 5.82144600  | -1.27803600 | 1.30358500  |
| C  | 6.16671400  | -2.64373500 | 1.23571800  |
| C  | 6.78311400  | -0.33587500 | 0.88823500  |
| C  | 7.41312000  | -3.04493100 | 0.76440700  |
| H  | 5.45853300  | -3.39754800 | 1.56786500  |
| C  | 8.03116500  | -0.73845700 | 0.41630900  |
| H  | 6.53460800  | 0.72171500  | 0.92706000  |
| C  | 8.35337400  | -2.09522400 | 0.35102400  |
| H  | 7.65693600  | -4.10363300 | 0.72517800  |
| H  | 8.75375200  | 0.00944400  | 0.09988700  |

|   |            |             |             |
|---|------------|-------------|-------------|
| H | 9.32724700 | -2.41172700 | -0.01280100 |
| C | 1.13513500 | -3.20391000 | 3.27119400  |
| H | 1.65351100 | -3.36540300 | 4.22566600  |
| H | 0.12648500 | -3.61656400 | 3.36854600  |
| H | 1.66513400 | -3.77166200 | 2.50173400  |
| H | 0.04335200 | -1.94923500 | 1.61680400  |
| O | 1.83705000 | 0.50656800  | 0.03131700  |
| S | 1.99653100 | 1.97570200  | 0.46961300  |
| O | 2.22551500 | 2.10682200  | 1.92667100  |
| O | 0.93892000 | 2.83175500  | -0.10029800 |
| C | 3.54044100 | 2.43476600  | -0.33531000 |
| C | 4.48447000 | 3.17017400  | 0.37968100  |
| C | 3.76602200 | 2.11347200  | -1.67671000 |
| C | 5.66174400 | 3.57939400  | -0.25230000 |
| H | 4.29245500 | 3.41427100  | 1.41916600  |
| C | 4.94507600 | 2.52412400  | -2.29234700 |
| H | 3.02689800 | 1.54111000  | -2.22687000 |
| C | 5.91291000 | 3.26255400  | -1.59248300 |
| H | 6.39422200 | 4.15711900  | 0.30717100  |
| H | 5.11980500 | 2.26806500  | -3.33531000 |
| C | 7.19500000 | 3.68728000  | -2.27038000 |
| H | 7.74609000 | 4.41425500  | -1.66529000 |
| H | 7.85801800 | 2.82907800  | -2.44230300 |
| H | 6.99932100 | 4.14219100  | -3.24858600 |

Cartesian coordinates of the calculated transition states.

#### **TS-4**

Thermal Correction to Free Energy: 0.857359 Hartree

SCF energy: -3868.529741 Hartree

Gibbs free energy: -3867.672382 Hartree

Coordinates:

|   |             |            |             |
|---|-------------|------------|-------------|
| C | -2.90012000 | 3.23279300 | -4.40630800 |
| C | -1.67548300 | 2.60776400 | -4.42052000 |
| C | -1.38359300 | 1.55531400 | -3.51276400 |
| C | -2.37573700 | 1.12462000 | -2.57538300 |
| C | -3.63165000 | 1.79944300 | -2.59049000 |
| C | -3.88314400 | 2.82456700 | -3.47458900 |

|   |             |             |             |
|---|-------------|-------------|-------------|
| H | 0.62593200  | 1.21150400  | -4.23575400 |
| H | -3.11232100 | 4.04215200  | -5.09973400 |
| H | -0.90341500 | 2.91469100  | -5.12197000 |
| C | -0.12771500 | 0.90661500  | -3.51370900 |
| C | -2.09034700 | 0.04839100  | -1.65286800 |
| H | -4.39617600 | 1.51724300  | -1.87729200 |
| H | -4.84482800 | 3.32957400  | -3.44983200 |
| C | -0.81048600 | -0.52535100 | -1.64984700 |
| C | 0.15116700  | -0.07786500 | -2.60400400 |
| C | -3.27455600 | -0.45516300 | -0.86511300 |
| C | -4.24260400 | -1.24996900 | -1.58409000 |
| C | -3.52859900 | -0.08922200 | 0.45589000  |
| C | -4.06243800 | -1.63892700 | -2.94338200 |
| C | -5.43554000 | -1.68605900 | -0.92273700 |
| C | -4.72982600 | -0.52967100 | 1.08594200  |
| C | -4.99461000 | -2.41518900 | -3.59768100 |
| H | -3.17320000 | -1.31604300 | -3.47243000 |
| C | -6.37991500 | -2.48295200 | -1.62367000 |
| C | -5.64916200 | -1.30298900 | 0.42533500  |
| C | -6.16833500 | -2.84471400 | -2.93444300 |
| H | -4.82925400 | -2.69435100 | -4.63489500 |
| H | -7.27885900 | -2.80089100 | -1.10045700 |
| H | -6.56041600 | -1.62239000 | 0.92629700  |
| H | -6.89875100 | -3.45215900 | -3.46205700 |
| H | -4.92100600 | -0.24486500 | 2.11433700  |
| H | 1.13486000  | -0.52746300 | -2.61440900 |
| P | -2.30819100 | 1.01636000  | 1.33007400  |
| P | -0.07270700 | -1.63485700 | -0.34437700 |
| C | -3.00354600 | 2.69341600  | 0.95045300  |
| C | -4.35573000 | 3.03189100  | 1.13885700  |
| C | -2.12434500 | 3.65840800  | 0.43755100  |
| C | -4.81580900 | 4.31039300  | 0.82785200  |
| H | -5.05188000 | 2.29577100  | 1.53153700  |
| C | -2.59046700 | 4.94019700  | 0.12677600  |
| H | -1.08223200 | 3.40825600  | 0.26125600  |
| C | -3.93115400 | 5.26865600  | 0.32148200  |
| H | -5.86318500 | 4.56031900  | 0.97955500  |
| H | -1.89799200 | 5.67590900  | -0.27323000 |

|    |             |             |             |
|----|-------------|-------------|-------------|
| H  | -4.29110700 | 6.26551200  | 0.07861100  |
| C  | -2.77278600 | 0.78704900  | 3.11055700  |
| C  | -2.90337600 | 1.88080300  | 3.98170300  |
| C  | -2.83903800 | -0.50777600 | 3.66067400  |
| C  | -3.10897500 | 1.68817200  | 5.35016000  |
| H  | -2.84677900 | 2.89145500  | 3.59032300  |
| C  | -3.06100800 | -0.69926100 | 5.02495100  |
| H  | -2.72844700 | -1.37593900 | 3.01586700  |
| C  | -3.19534000 | 0.39949600  | 5.87782000  |
| H  | -3.20819500 | 2.55205200  | 6.00259100  |
| H  | -3.12611300 | -1.70939100 | 5.42245200  |
| H  | -3.36391100 | 0.25124700  | 6.94115900  |
| C  | 1.22369600  | -2.64301400 | -1.23518300 |
| C  | 0.95417000  | -3.88518300 | -1.83142300 |
| C  | 2.54402500  | -2.15716300 | -1.26942900 |
| C  | 1.97048700  | -4.61429100 | -2.45146000 |
| H  | -0.04514800 | -4.30298000 | -1.80534100 |
| C  | 3.55808600  | -2.88888500 | -1.89094500 |
| H  | 2.78060600  | -1.19902900 | -0.82046700 |
| C  | 3.27500200  | -4.11985900 | -2.48373300 |
| H  | 1.73834700  | -5.57459900 | -2.90483800 |
| H  | 4.57063900  | -2.49541800 | -1.89770900 |
| H  | 4.06557800  | -4.69262300 | -2.96146700 |
| C  | -1.29334900 | -2.93164000 | 0.13558100  |
| C  | -1.30744400 | -3.41541700 | 1.45219100  |
| C  | -2.14128400 | -3.53505000 | -0.80676000 |
| C  | -2.14595000 | -4.47053200 | 1.81818100  |
| H  | -0.65610800 | -2.96531100 | 2.19417200  |
| C  | -2.98435100 | -4.58489000 | -0.44130900 |
| H  | -2.15370100 | -3.17987700 | -1.83099800 |
| C  | -2.98780700 | -5.05687200 | 0.87249400  |
| H  | -2.14048600 | -4.83080800 | 2.84353800  |
| H  | -3.64347200 | -5.02471400 | -1.18438000 |
| H  | -3.64441700 | -5.87464200 | 1.15725600  |
| Ni | 1.13167300  | -0.51812400 | 1.23779500  |
| C  | 2.66719900  | -0.21044200 | 2.58946700  |
| H  | 2.79454500  | 0.86654600  | 2.52095700  |
| C  | 3.75482300  | -1.06460700 | 2.13941500  |

|   |             |             |             |
|---|-------------|-------------|-------------|
| H | 3.64706700  | -2.13155300 | 2.33546300  |
| C | 4.85457300  | -0.59851700 | 1.50294600  |
| H | 4.90330200  | 0.47075800  | 1.30176100  |
| C | 1.59939000  | -0.69187800 | 3.36990900  |
| C | 5.99763700  | -1.37191700 | 1.01716300  |
| C | 6.17287600  | -2.74821000 | 1.27045000  |
| C | 6.98236000  | -0.71379600 | 0.25331600  |
| C | 7.27961700  | -3.43138500 | 0.77583200  |
| H | 5.44109900  | -3.28600900 | 1.86616700  |
| C | 8.08994000  | -1.39915200 | -0.24288000 |
| H | 6.86490900  | 0.34752400  | 0.04686000  |
| C | 8.24496700  | -2.76239300 | 0.01571200  |
| H | 7.39357000  | -4.49166500 | 0.98674300  |
| H | 8.83369500  | -0.86732000 | -0.83067700 |
| H | 9.10903400  | -3.29909100 | -0.36656800 |
| H | 0.52877600  | -1.37692000 | 2.29138800  |
| O | 1.92127500  | 0.72863900  | -0.03054900 |
| S | 1.84404600  | 2.26276300  | 0.14206000  |
| O | 1.75228800  | 2.64515700  | 1.56946700  |
| O | 0.85439000  | 2.85632400  | -0.77316900 |
| C | 3.46467500  | 2.78363300  | -0.44257600 |
| C | 4.40413700  | 3.28473000  | 0.45682500  |
| C | 3.77302800  | 2.67737700  | -1.80135600 |
| C | 5.66480200  | 3.66834400  | -0.00806800 |
| H | 4.13996700  | 3.38102300  | 1.50470800  |
| C | 5.03379700  | 3.06106800  | -2.25045200 |
| H | 3.02632400  | 2.30542500  | -2.49563400 |
| C | 6.00040600  | 3.56279900  | -1.36370500 |
| H | 6.39524500  | 4.06270800  | 0.69491600  |
| H | 5.27348100  | 2.97565400  | -3.30817200 |
| C | 7.35248500  | 4.01067800  | -1.86905300 |
| H | 8.09752100  | 4.02111400  | -1.06675000 |
| H | 7.72074700  | 3.35553900  | -2.66650400 |
| H | 7.30381200  | 5.02676800  | -2.28302900 |
| C | 0.75929900  | 0.25415700  | 4.19641300  |
| H | -0.24363700 | -0.13700600 | 4.37872800  |
| H | 1.24572800  | 0.39827000  | 5.17137200  |
| H | 0.67484500  | 1.22771400  | 3.70709000  |

H 1.69150900 -1.70530800 3.76500900



## 11. References

- [1] Park, S.; Malcolmson, S. J. Development and Mechanistic Investigations of Enantioselective Pd-Catalyzed Intermolecular Hydroaminations of Internal Dienes. *ACS Catal.* **2018**, *8*, 8468-8476.
- [2] Long, J.; Wang, P.; Wang, W.; Li, Y.; Yin, G. Nickel/Brønsted Acid-Catalyzed Chemo- and Enantioselective Intermolecular Hydroamination of Conjugated Dienes. *iScience* **2019**, *22*, 369-379.
- [3] Busacca, C. A.; Lorenz, J. C.; Grinberg, N.; Haddad, N.; Hrapchak, M.; Latli, B.; Lee, H.; Sabila, P.; Saha, A.; Sarvestani, M.; Shen, S.; Varsolona, R.; Wei, X.; Senanayake, C. H. A Superior Method for the Reduction of Secondary Phosphine Oxides. *Org. Letter.* **2005**, *7*, 4277-4280.
- [4] Beaud, R.; Phipps, R. J.; Gaunt, M. J. Enantioselective Cu-Catalyzed Arylation of Secondary Phosphine Oxides with Diaryliodonium Salts toward the Synthesis of *P*-Chiral Phosphines. *J. Am. Chem. Soc.* **2016**, *138*, 13183-13186.
- [5] Trost, B. M.; Spohr, S. M.; Rolka, A. B.; Kalnmals, C. A. Desymmetrization of Phosphinic Acids via Pd-Catalyzed Asymmetric Allylic Alkylation: Rapid Access to *P*-Chiral Phosphinates. *J. Am. Chem. Soc.* **2019**, *141*, 14098-14103.
- [6] Kong, W.; Merino, E.; Nevado, C. Arylphosphonylation and Arylazidation of Activated Alkenes. *Angew. Chem. Int. Ed.* **2014**, *53*, 5078-5082.
- [7] Nie, S.-Z.; Davison, R. T.; Dong, V. M. Enantioselective Coupling of Dienes and Phosphine Oxides. *J. Am. Chem. Soc.* **2018**, *140*, 16450-16454.
- [8] Frisch, M. J.; Trucks, G. W.; Schlegel, H. B.; Scuseria, G. E.; Robb, M. A.; Cheeseman, J. R.; Scalmani, G.; Barone, V.; Men-nucci, B.; Petersson, G. A.; Nakatsuji, H.; Caricato, M.; Li, X.; Hratchian, H. P.; Izmaylov, A. F.; Bloino, J.; Zheng, G.; Sonnenberg, J. L.; Hada, M.; Ehara, M.; Toyota, K.; Fukuda, R.; Hasegawa, J.; Ishida, M.; Nakajima, T.; Honda, Y.; Kitao, O.; Nakai, H.; Vreven, T.; Jr., J. A. M.; Peralta, J. E.; Ogliaro, F.; Bearpark, M.; Heyd, J. J.; Brothers, E.; Kudin, K. N.; Staroverov, V. N.; Ko-bayashi, R.; Normand, J.; Raghavachari, K.; Rendell, A.; Burant, J. C.; Iyengar, S. S.; omasi, J. T.; Cossi, M.; Rega, N.; Millam, J. M.; Klene, M.; Knox, J. E.; Cross, J. B.; Bakken, V.; Adamo, C.; Jaramillo, J.; Gomperts, R.; Stratmann, R. E.; Yazyev, O.; Austin, A. J.; Cammi, R.; Pomelli, C.; Ochterski, J. W.; Martin, R. L.; Morokuma, K.; Zakrzewski, V. G.; Voth, G. A.; Salvador, P.; Dannenberg, J. J.; Dapprich, S.; Daniels, A. D.; Farkas, Ö.; Foresman, J. B.; Ortiz, J. V.; Cio-slawski, J.; Fox, D. J. Gaussian 09, Revision D.01; Gaussian, Inc.: Wallingford, Ct., **2013**.
- [9] Becke, A. D. Density-Functional Thermochemistry. III. The Role of Exact Exchange. *J. Chem. Phys.* **1993**, *98*, 5648-5652.
- [10] Lee, C.; Yang, W.; Parr, R. G. Development of the Colle-Salvetti Correlation-Energy Formula into a Functional of the Electron Density. *Phys. Rev. B.* **1988**, *37*, 785-789.
- [11] Zhao, Y.; Truhlar, D. G. The M06 Suite of Density Functionals for Main Group Thermochemistry, Thermochemical Kinetics, Noncovalent Interactions, Excited States, and Transition Elements: Two New Functionals and Systematic Testing of Four M06-Class Functionals and 12 Other Functionals. *Theor. Chem. Acc.* **2008**, *120*, 215-241.

- [12] Cancès, E.; Mennucci, B.; Tomasi, J. A New Integral Equation Formalism for the Polarizable Continuum Model: Theoretical Background and Applications to Isotropic and Anisotropic Dielectrics. *J. Chem. Phys.* **1997**, *107*, 3032-3041.
- [13] Cossi, M.; Barone, V.; Cammi, R.; Tomasi, J. Ab Initio Study of Solvated Molecules: A New Implementation of the Polarizable Continuum Model. *Chem. Phys. Lett.* **1996**, *255*, 327-335.
- [14] Legault, C. Y. Cylview, 1.0b; UniversitéDe Sherbrooke:. **2009**.

## 12. NMR Spectra

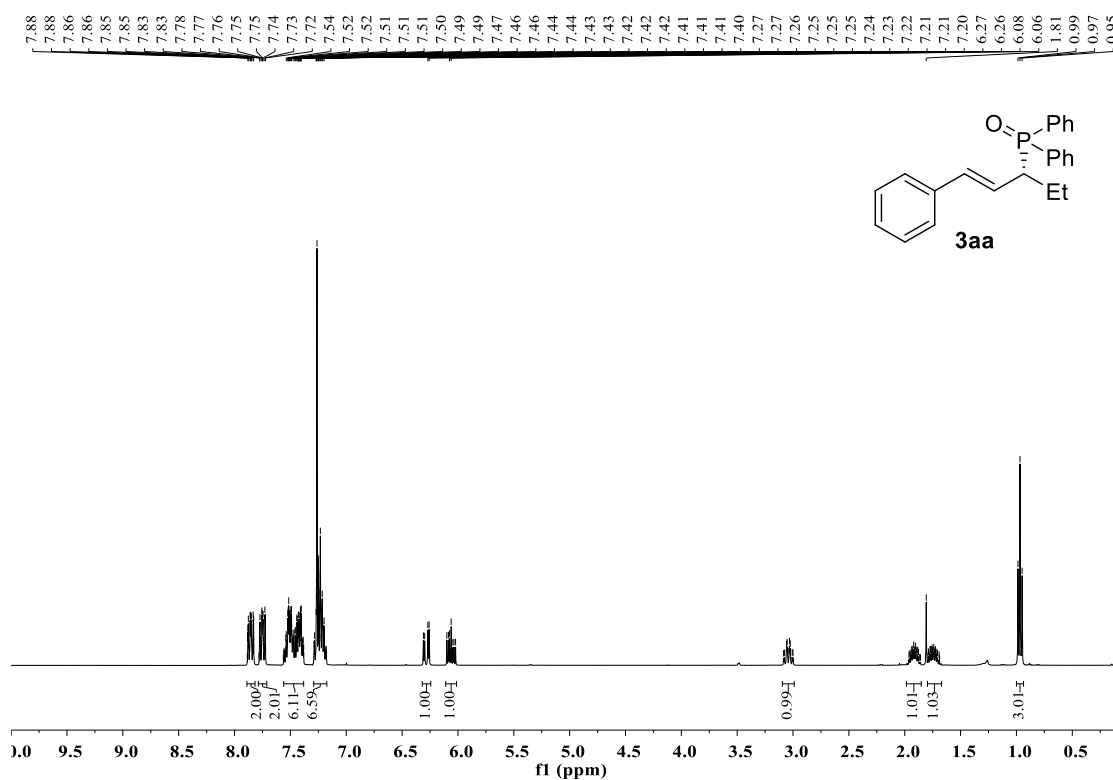

Figure S11. <sup>1</sup>H NMR spectra of **3aa**.

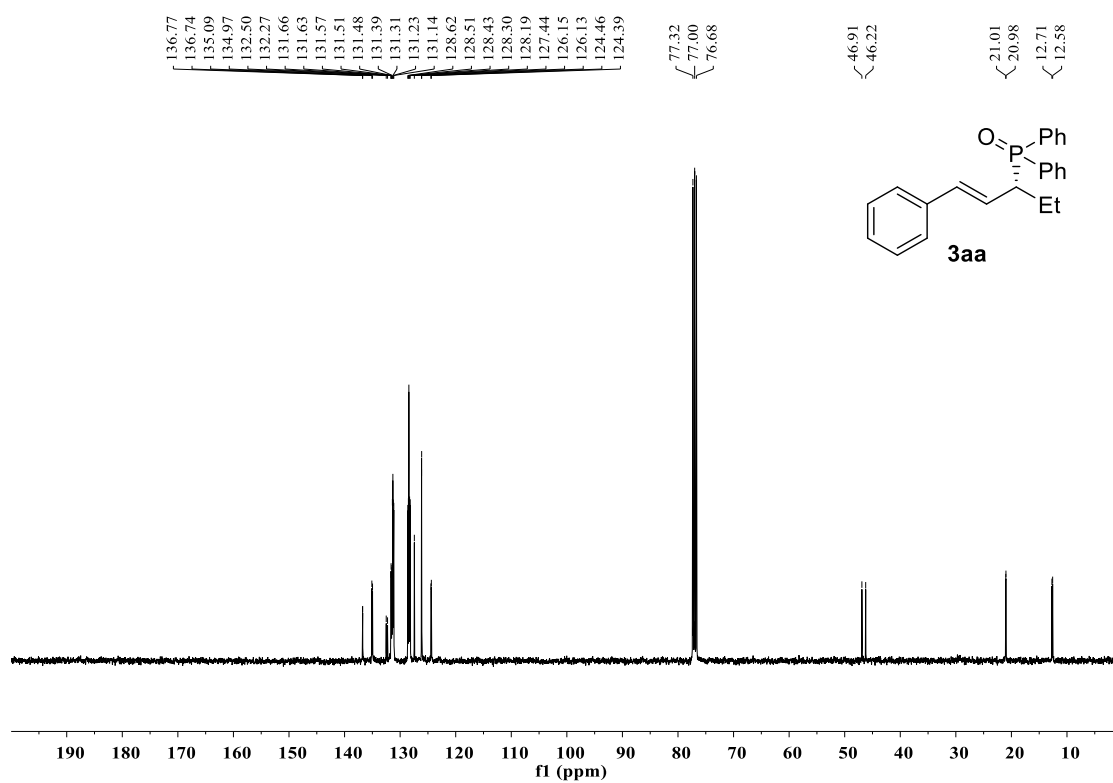

Figure S12. <sup>13</sup>C NMR spectra of **3aa**.

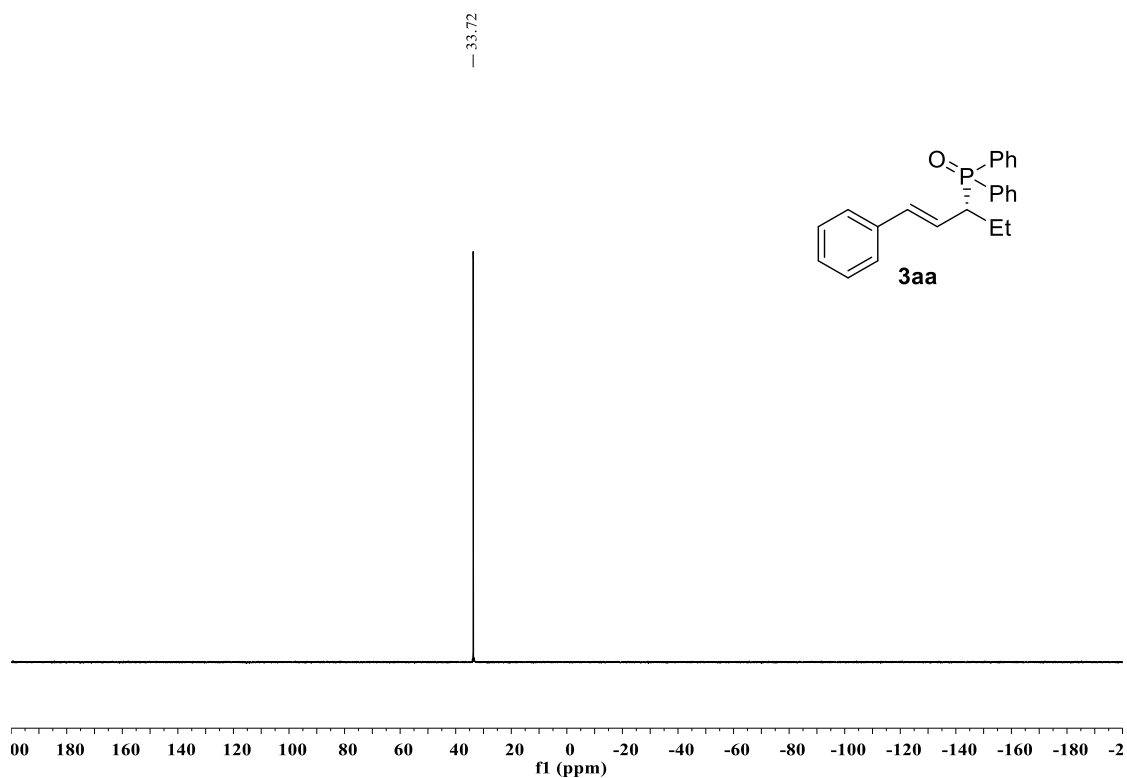

Figure S13.  $^{31}\text{P}$  NMR spectra of **3aa**.

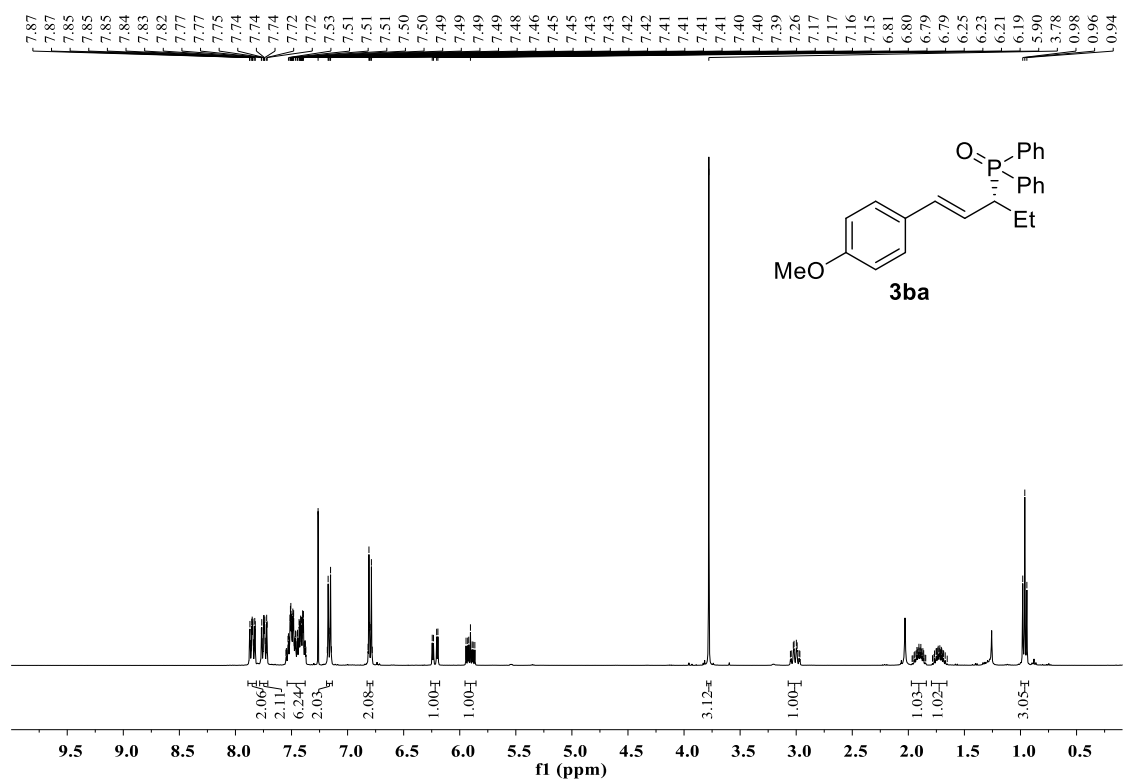

Figure S14.  $^1\text{H}$  NMR spectra of **3ba**.

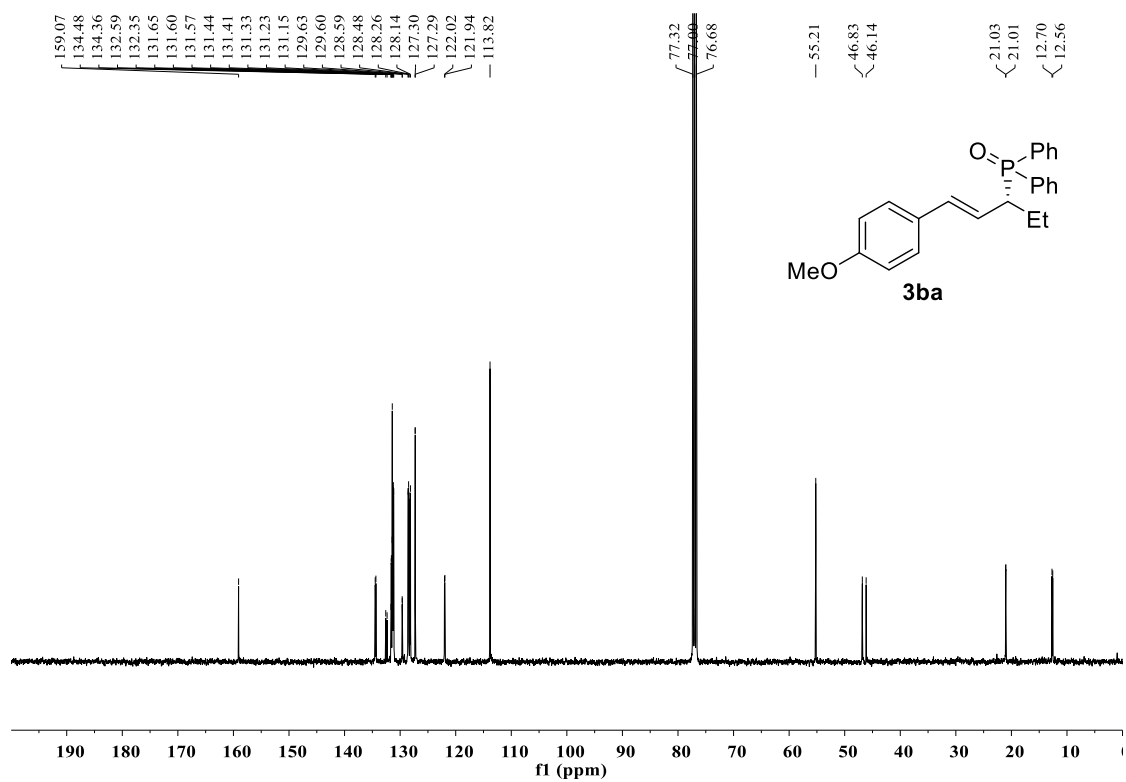

Figure S15. <sup>13</sup>C NMR spectra of **3ba**.

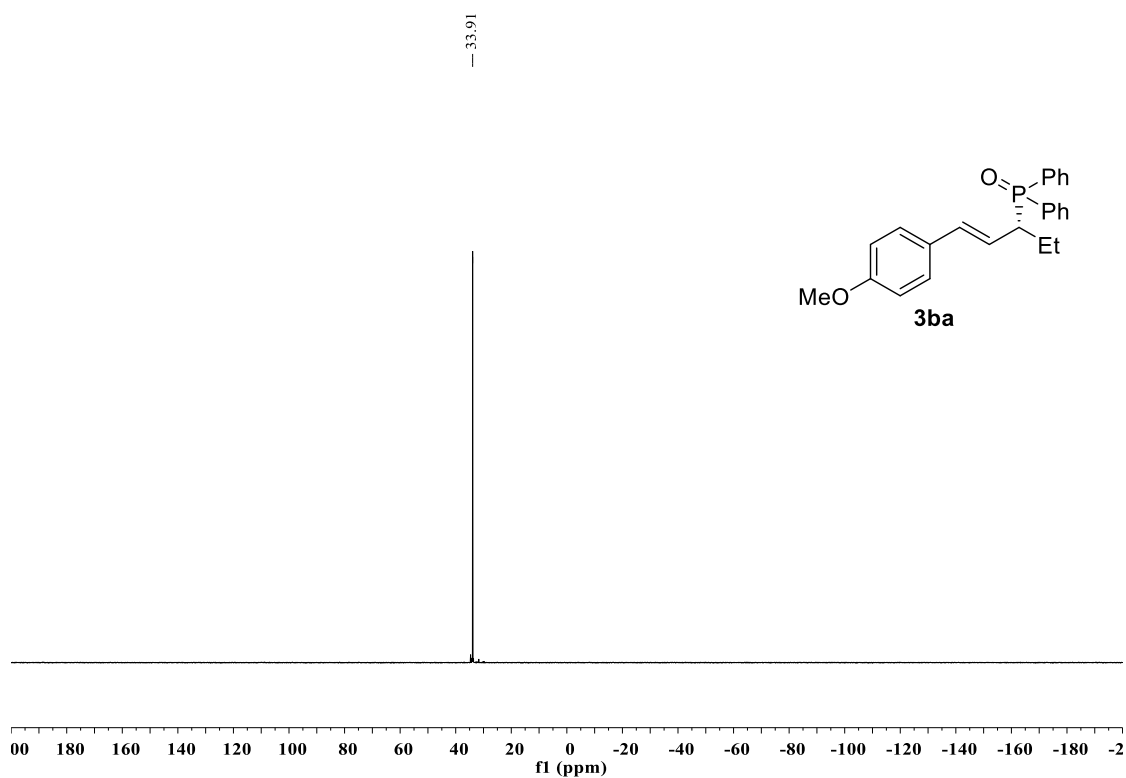

Figure S16. <sup>31</sup>P NMR spectra of **3ba**.

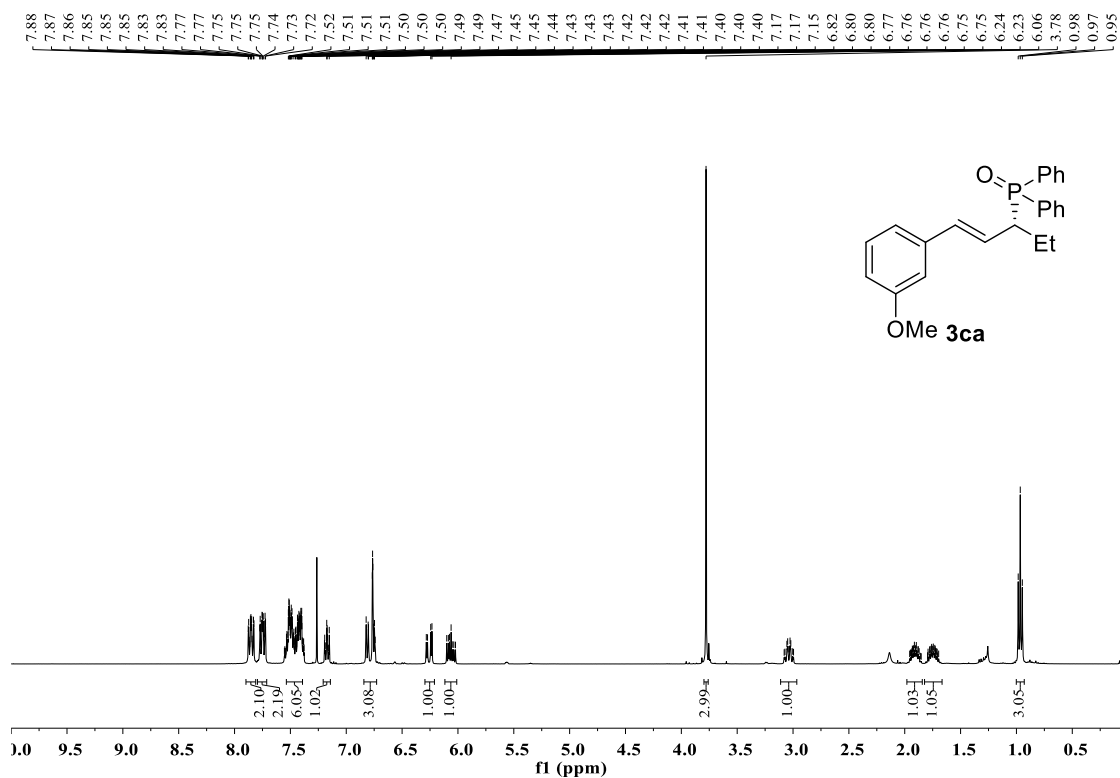

Figure S17.  $^1\text{H}$  NMR spectra of **3ca**.

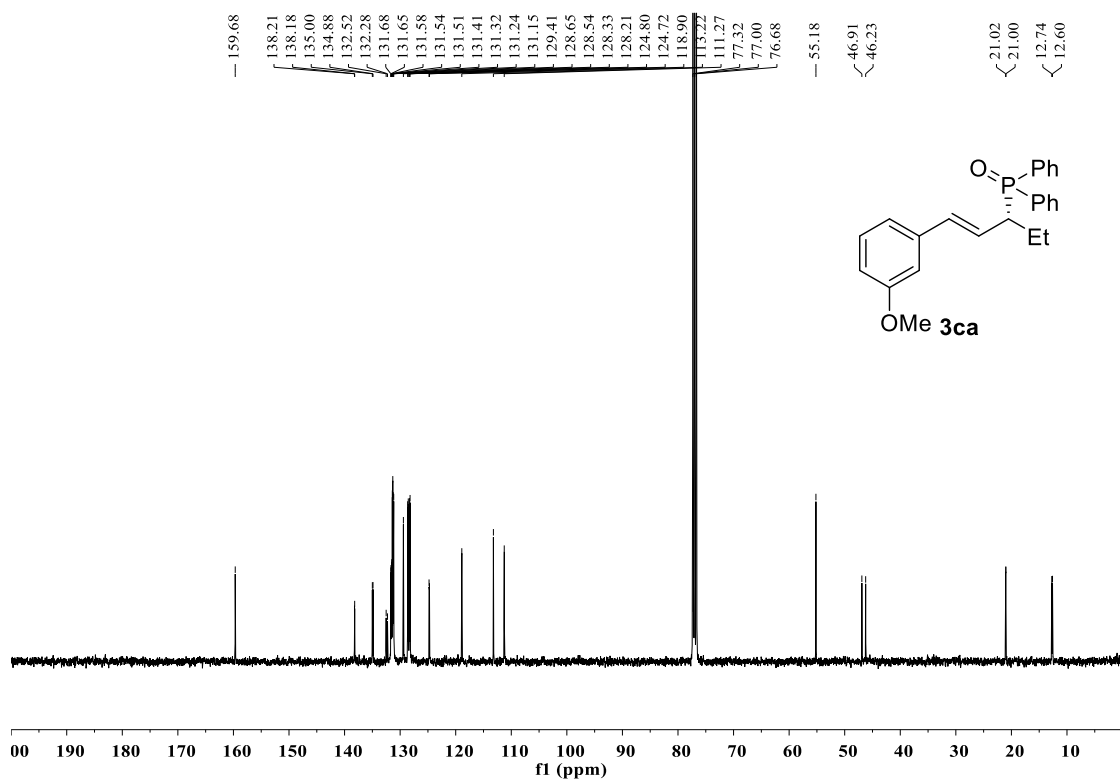

Figure S18.  $^{13}\text{C}$  NMR spectra of **3ca**.

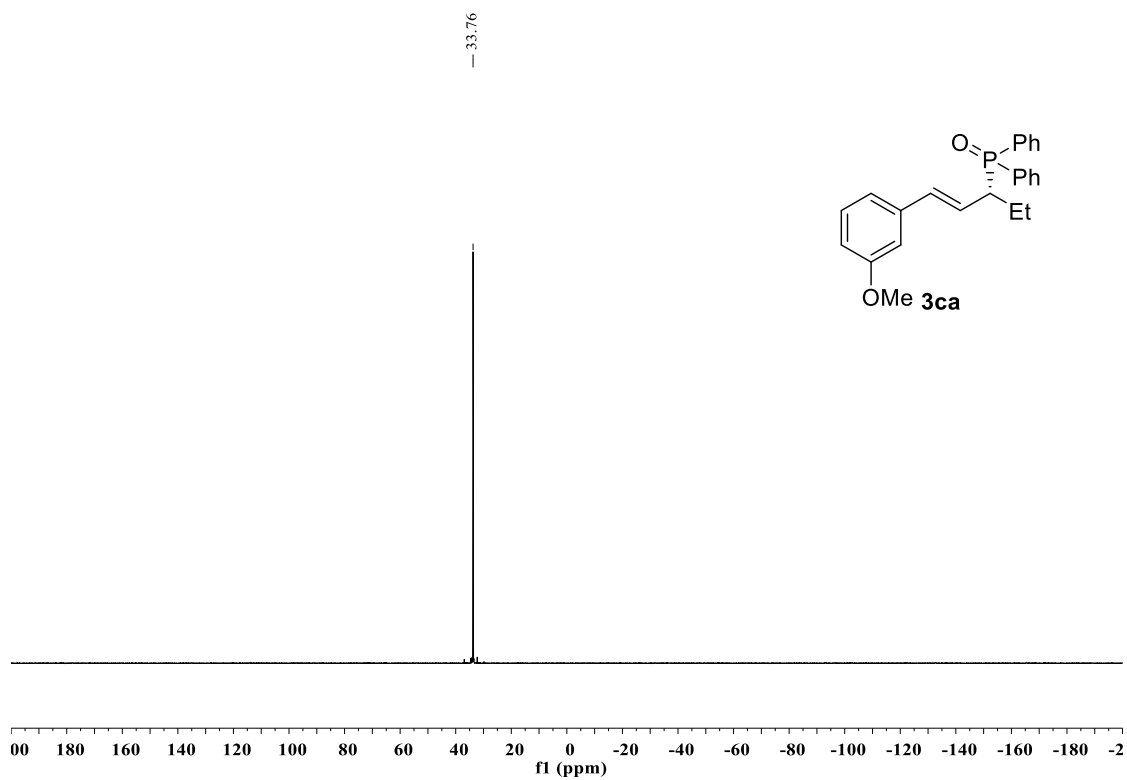

Figure S19.  $^{31}\text{P}$  NMR spectra of 3ca.

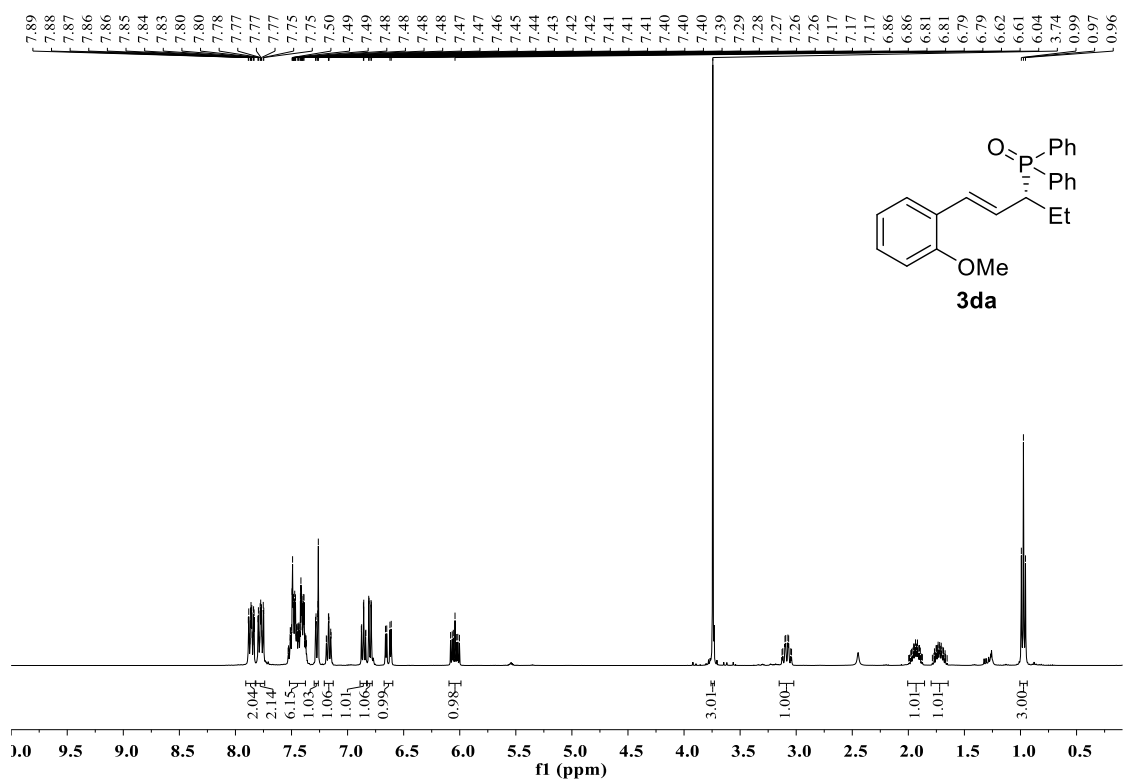

Figure S20.  $^1\text{H}$  NMR spectra of 3da.

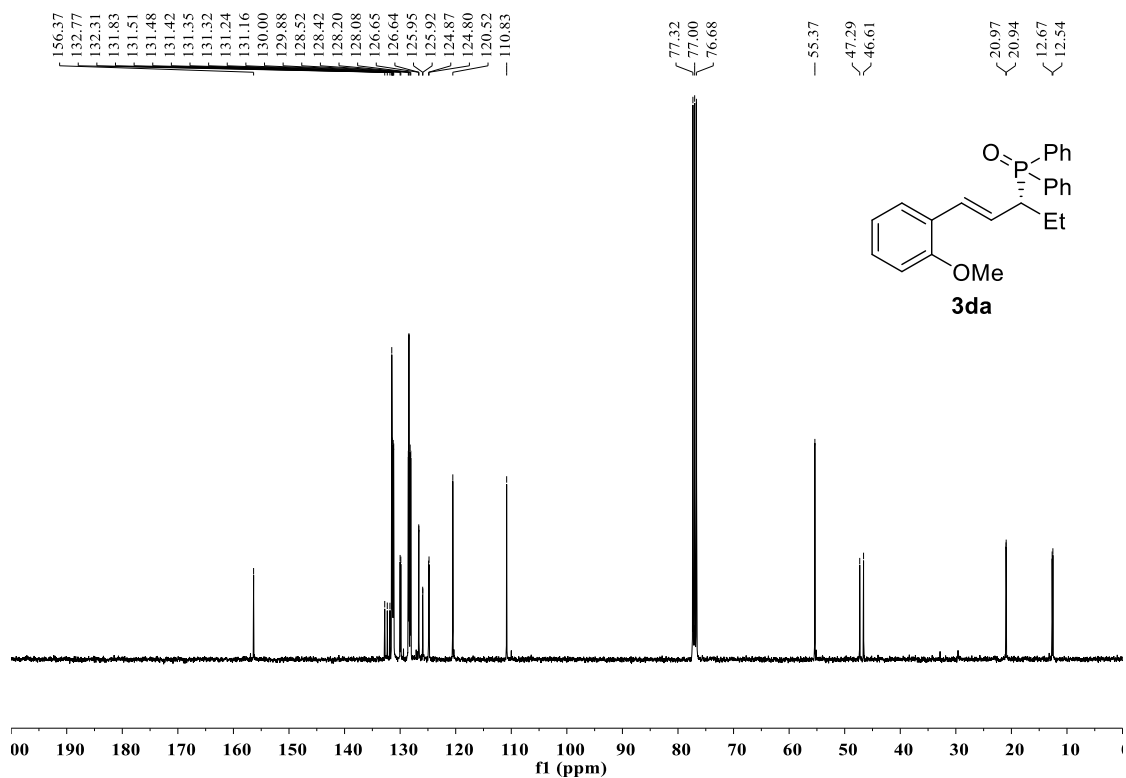

Figure S21. <sup>13</sup>C NMR spectra of **3da**.

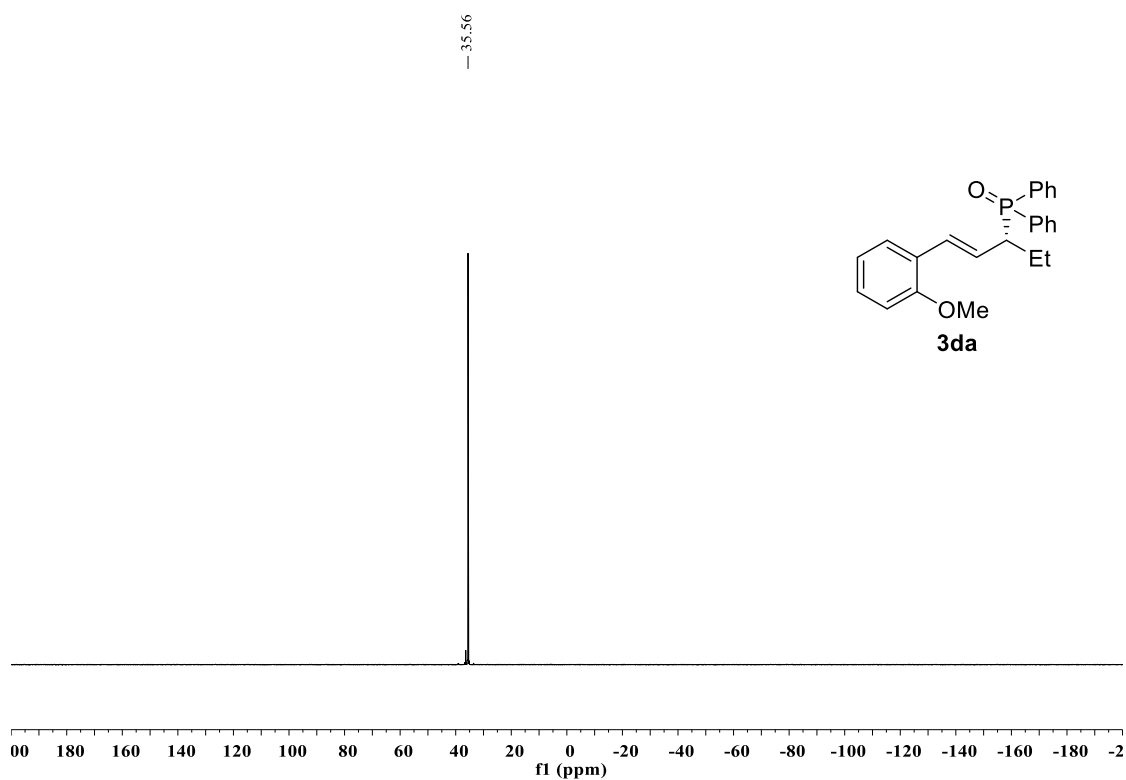

Figure S22. <sup>31</sup>P NMR spectra of **3da**.



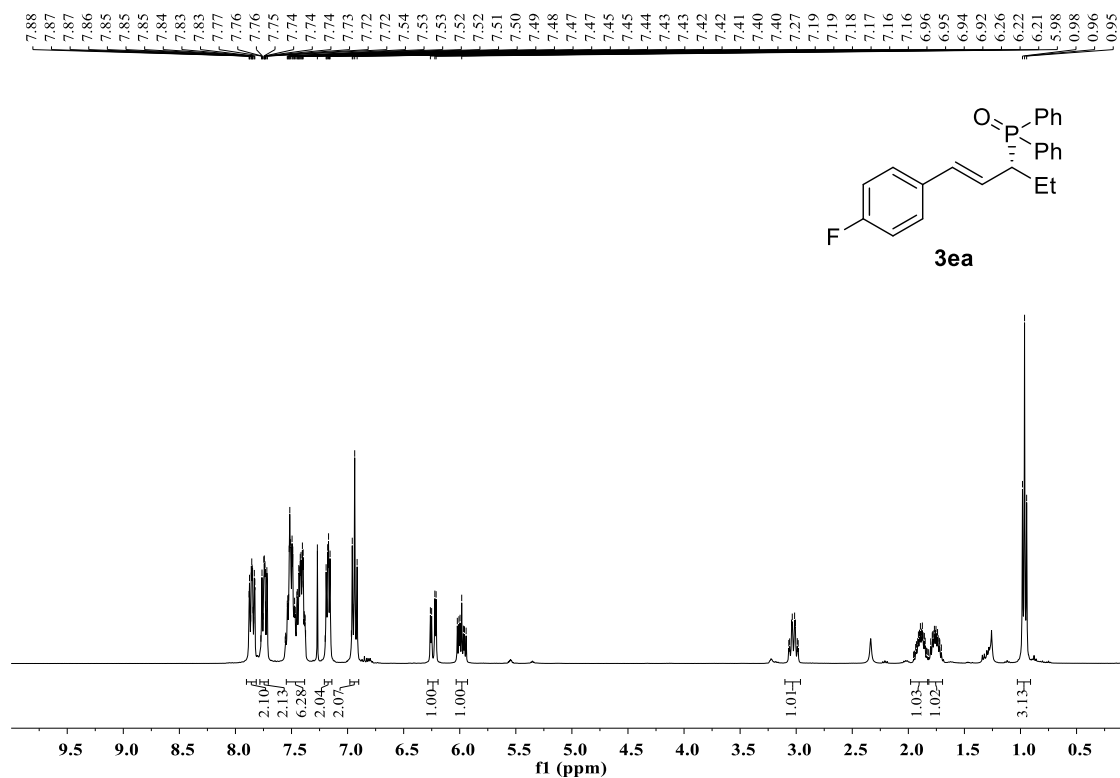

Figure S23. <sup>1</sup>H NMR spectra of **3ea**.

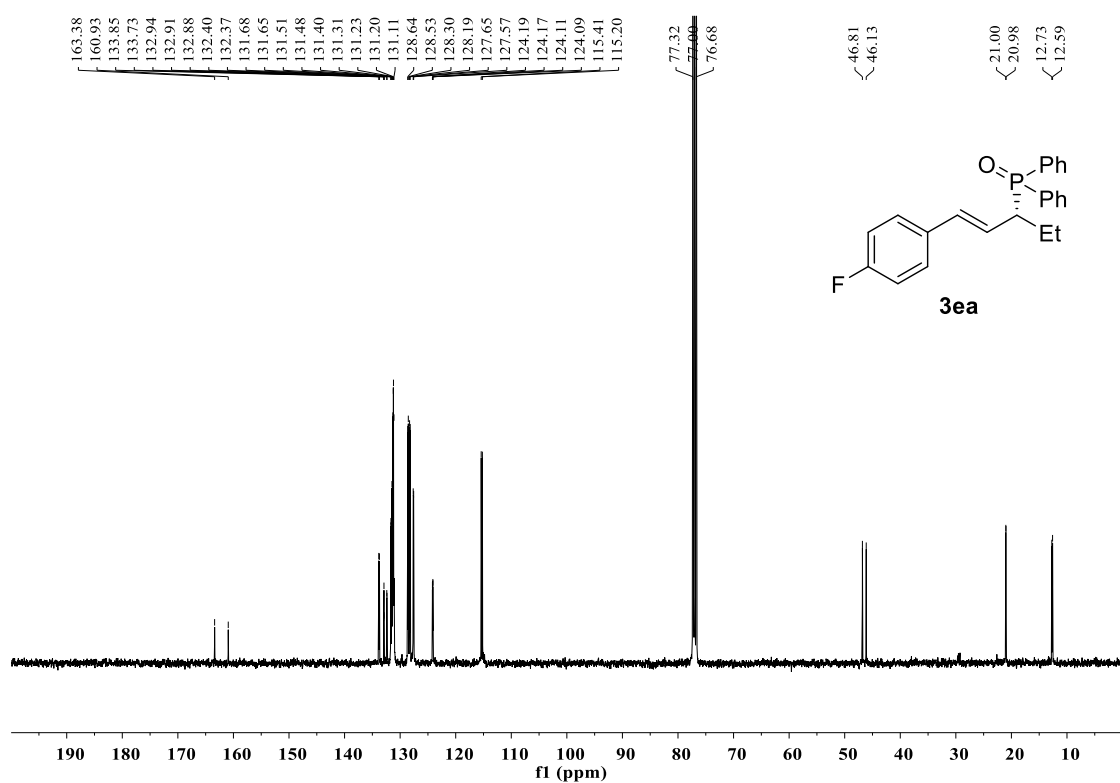

Figure S24. <sup>13</sup>C NMR spectra of **3ea**.

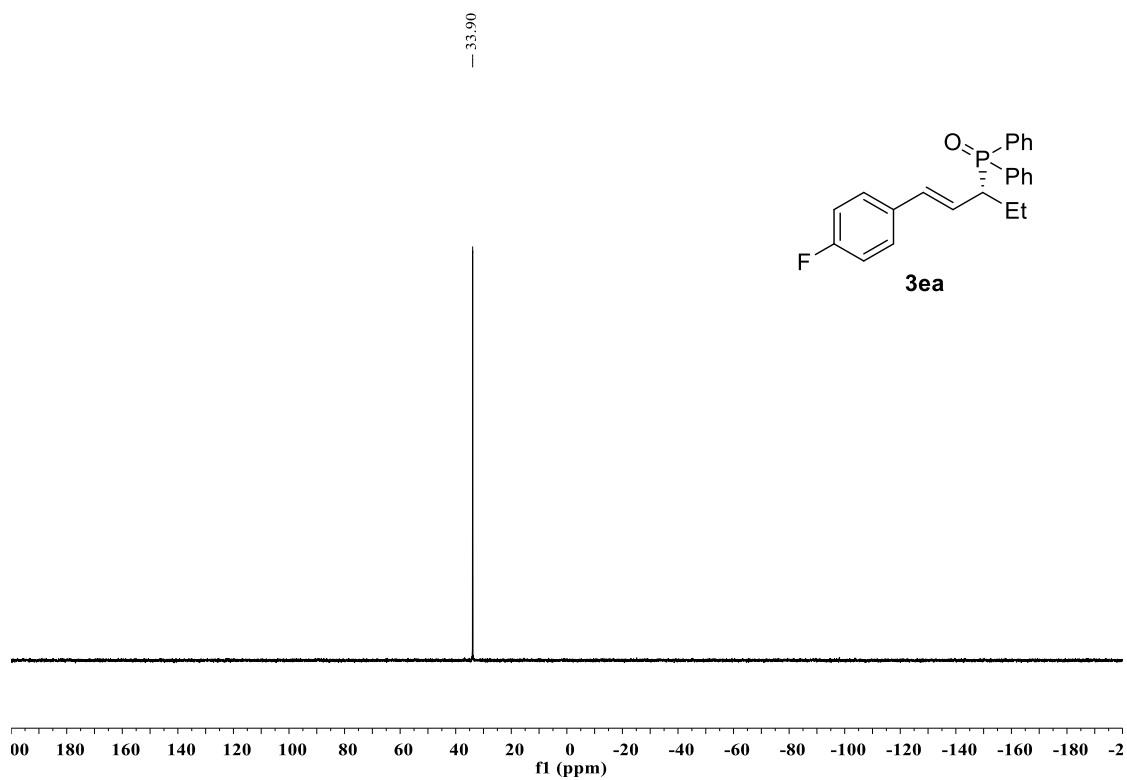

Figure S25.  $^{31}\text{P}$  NMR spectra of **3ea**.

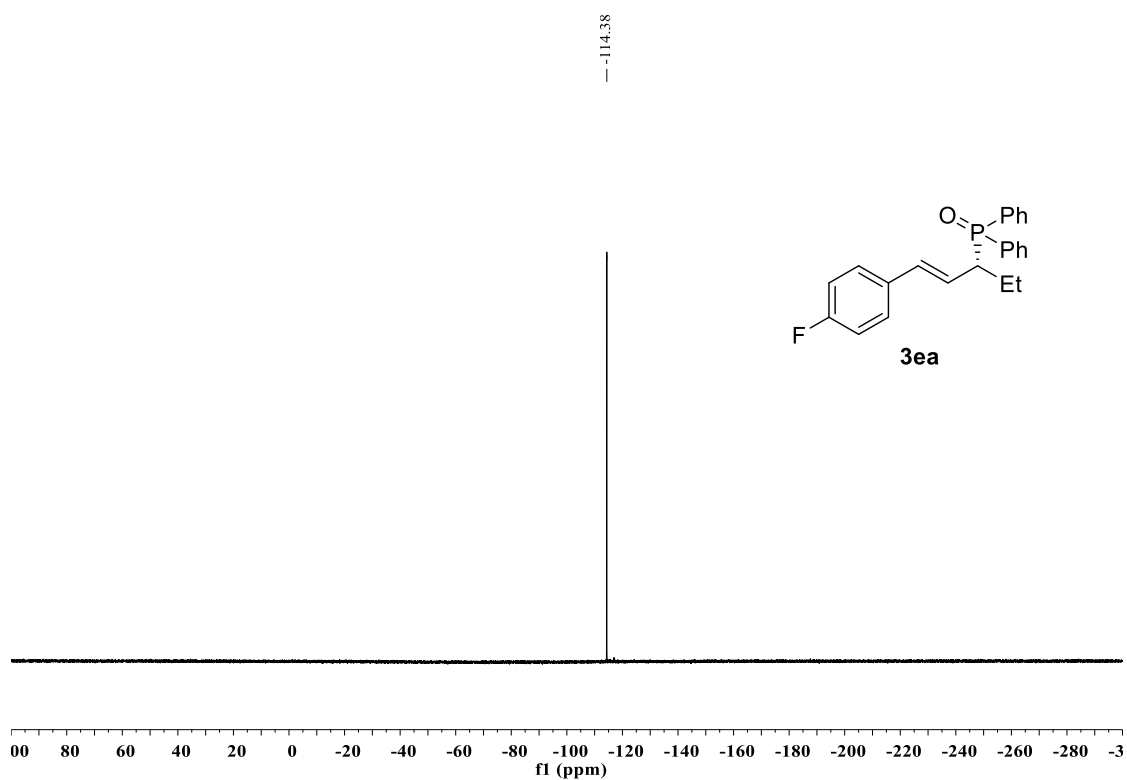

Figure S26.  $^{19}\text{F}$  NMR spectra of **3ea**.

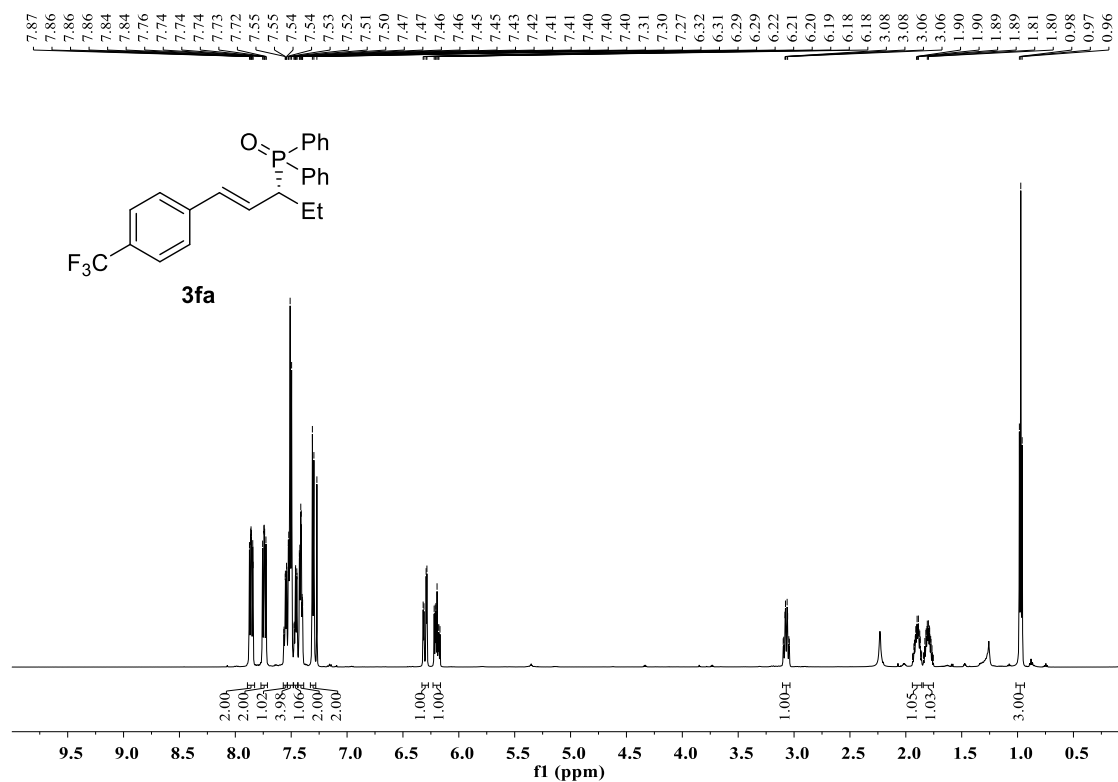

Figure S27. <sup>1</sup>H NMR spectra of 3fa.

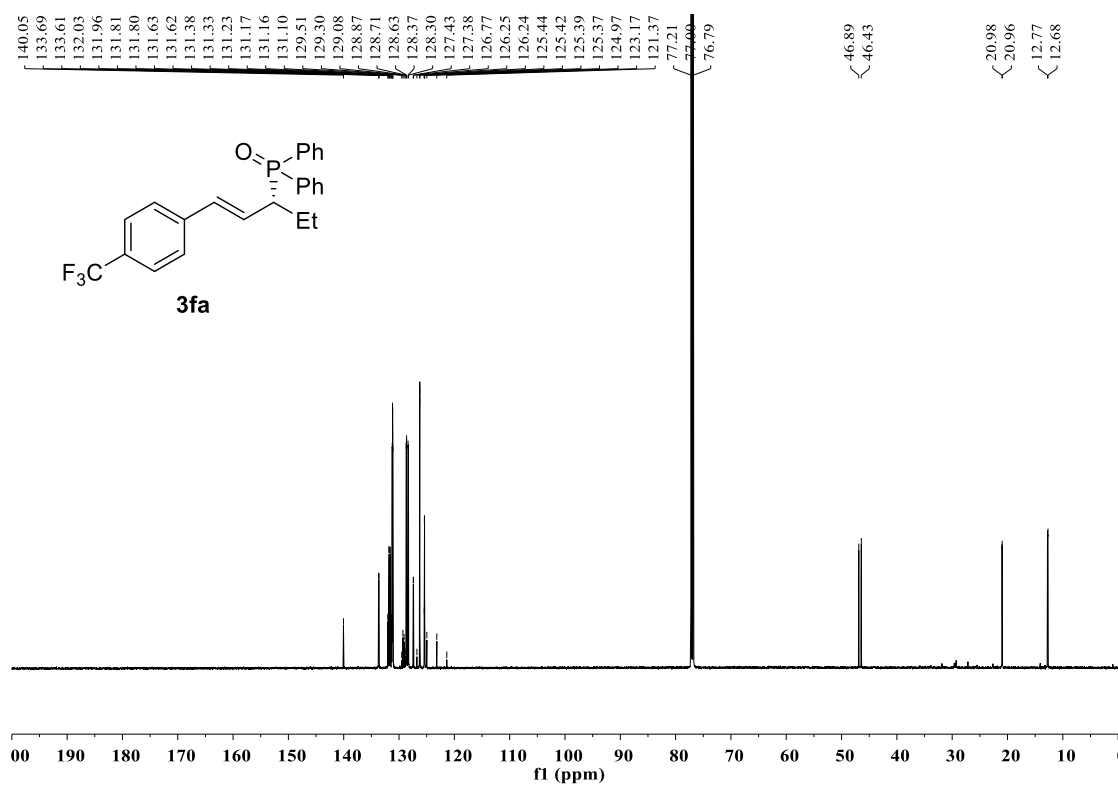

Figure S28. <sup>13</sup>C NMR spectra of 3fa.

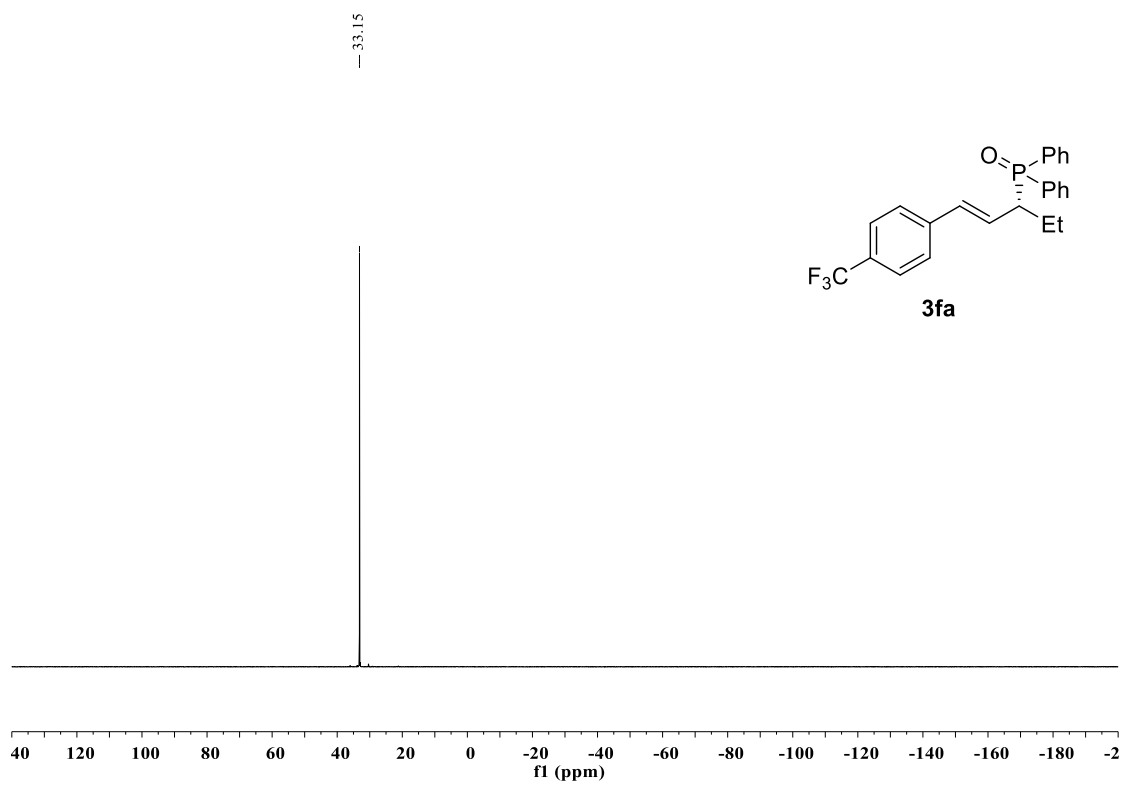

**Figure S29.**  $^{31}\text{P}$  NMR spectra of **3fa**.

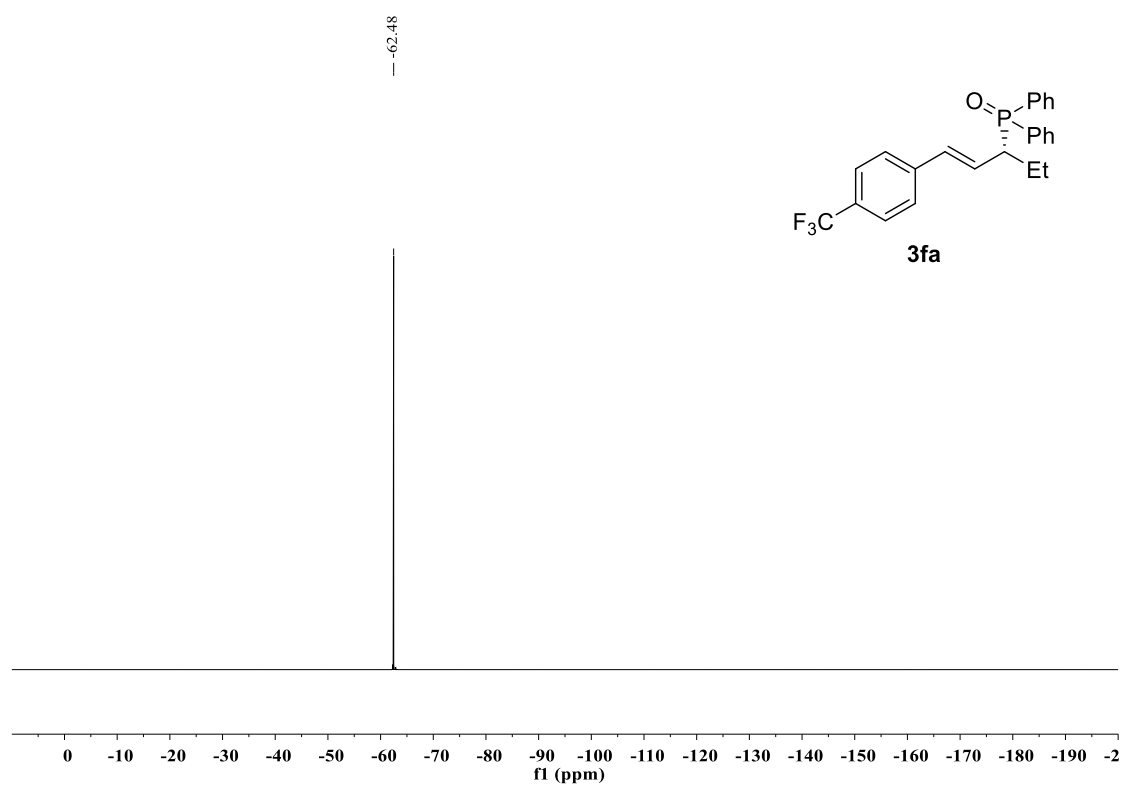

**Figure S30.**  $^{19}\text{F}$  NMR spectra of **3fa**.



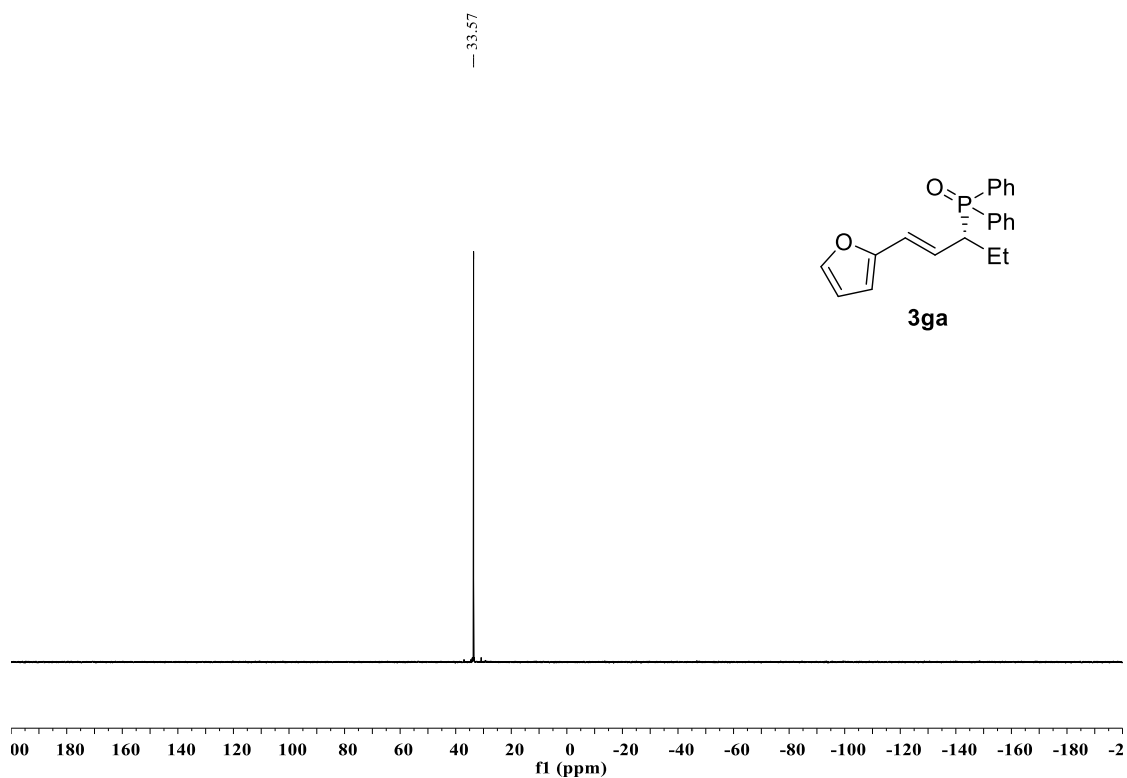

Figure S33.  $^{31}\text{P}$  NMR spectra of **3ga**.

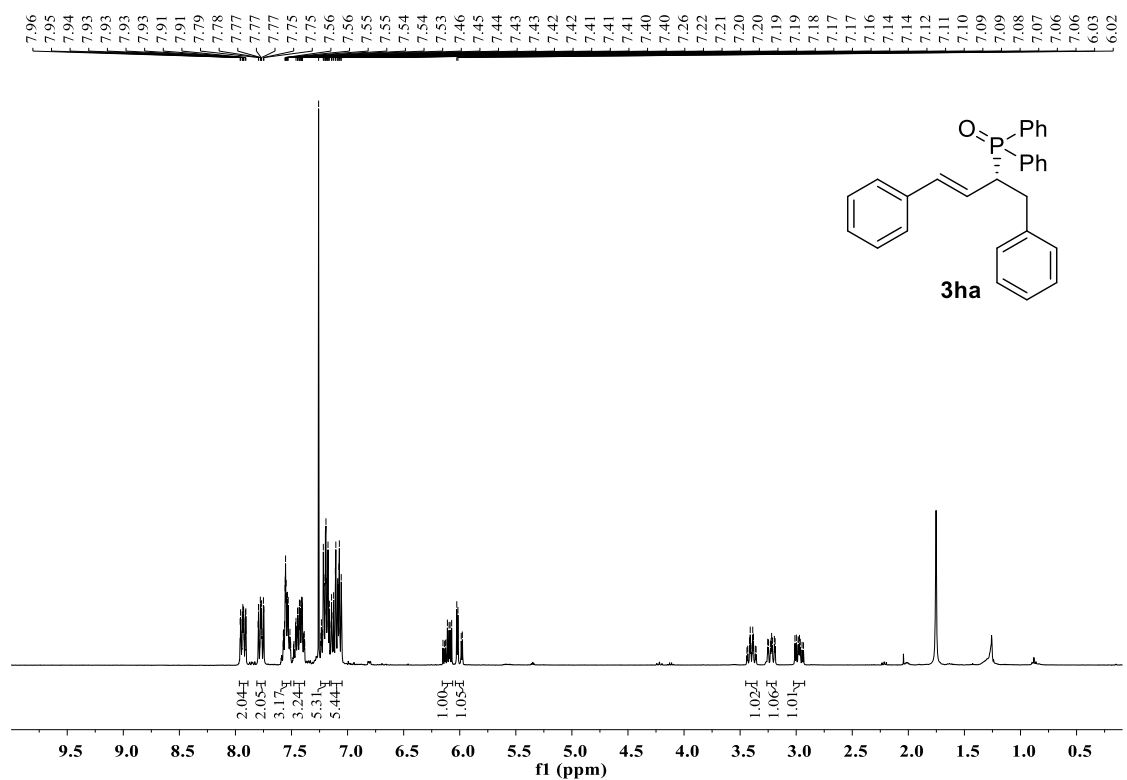

Figure S34.  $^1\text{H}$  NMR spectra of **3ha**.

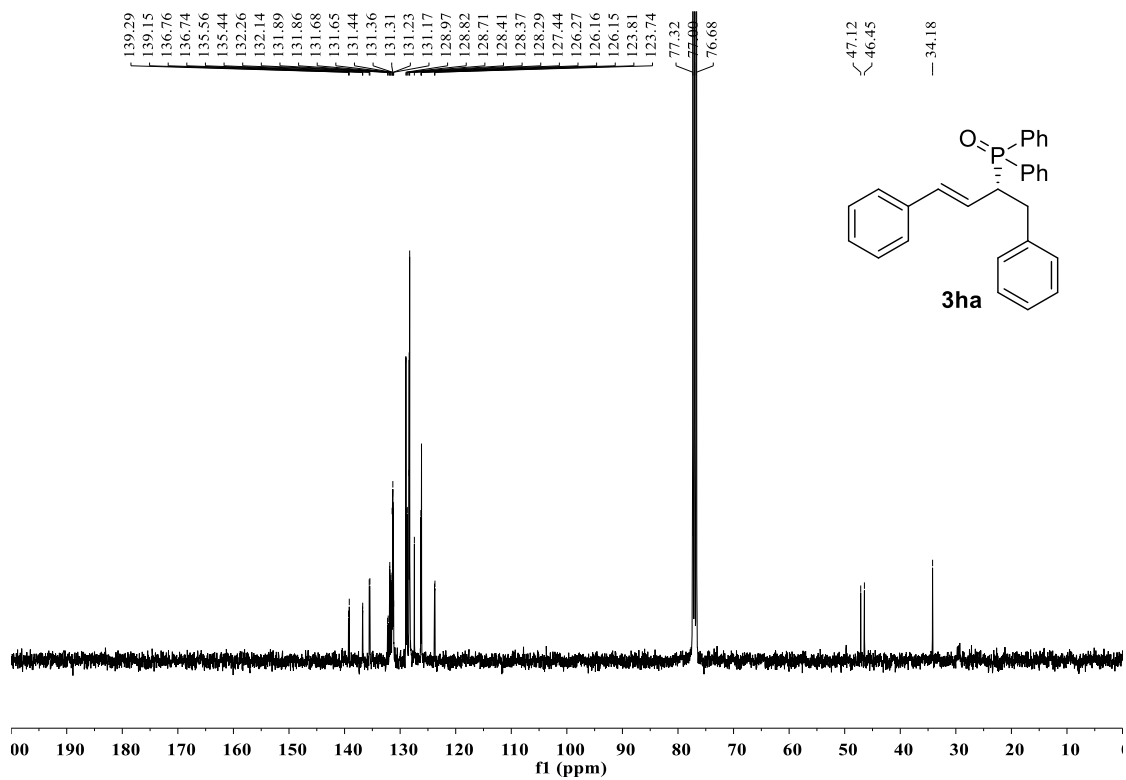

Figure S35. <sup>13</sup>C NMR spectra of 3ha.

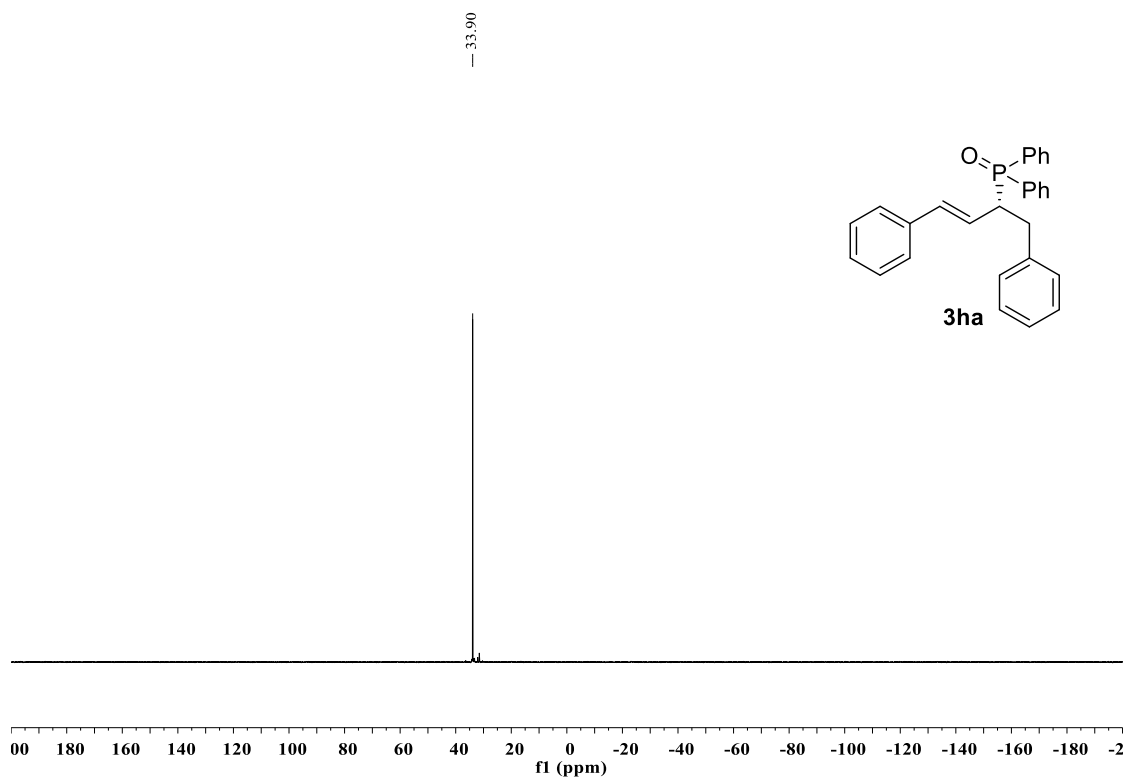

Figure S36. <sup>31</sup>P NMR spectra of 3ha.

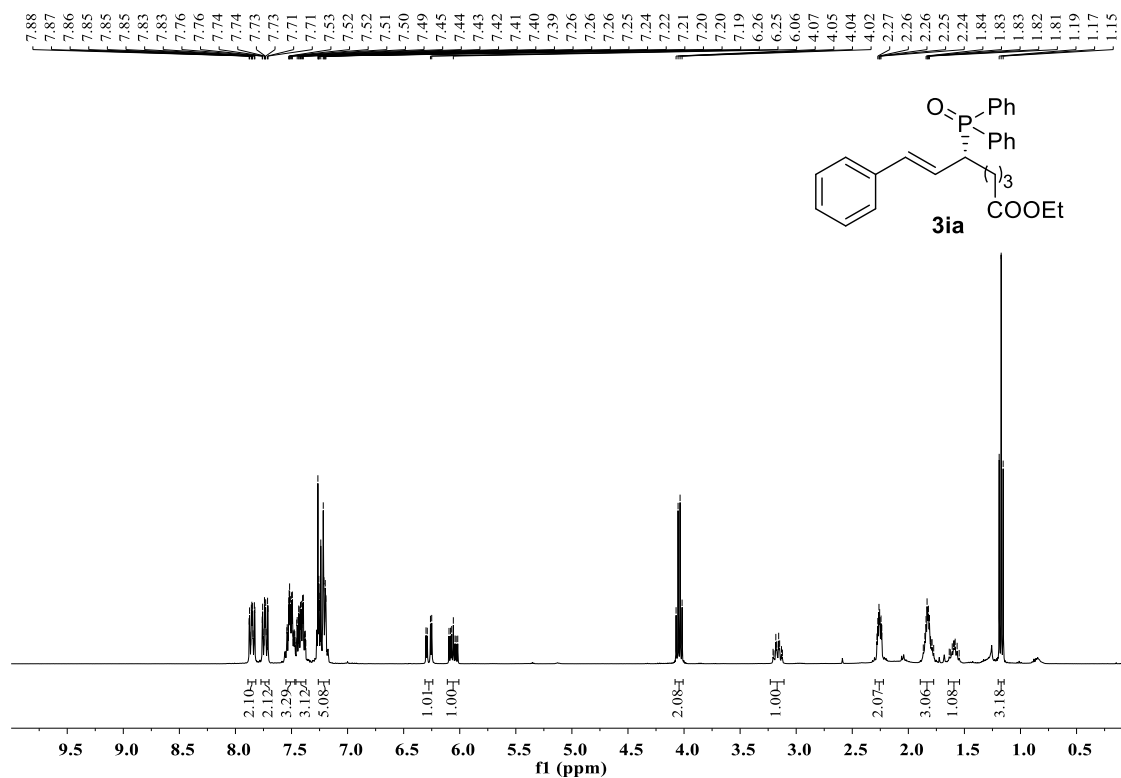

Figure S37.  $^1\text{H}$  NMR spectra of **3ia**.

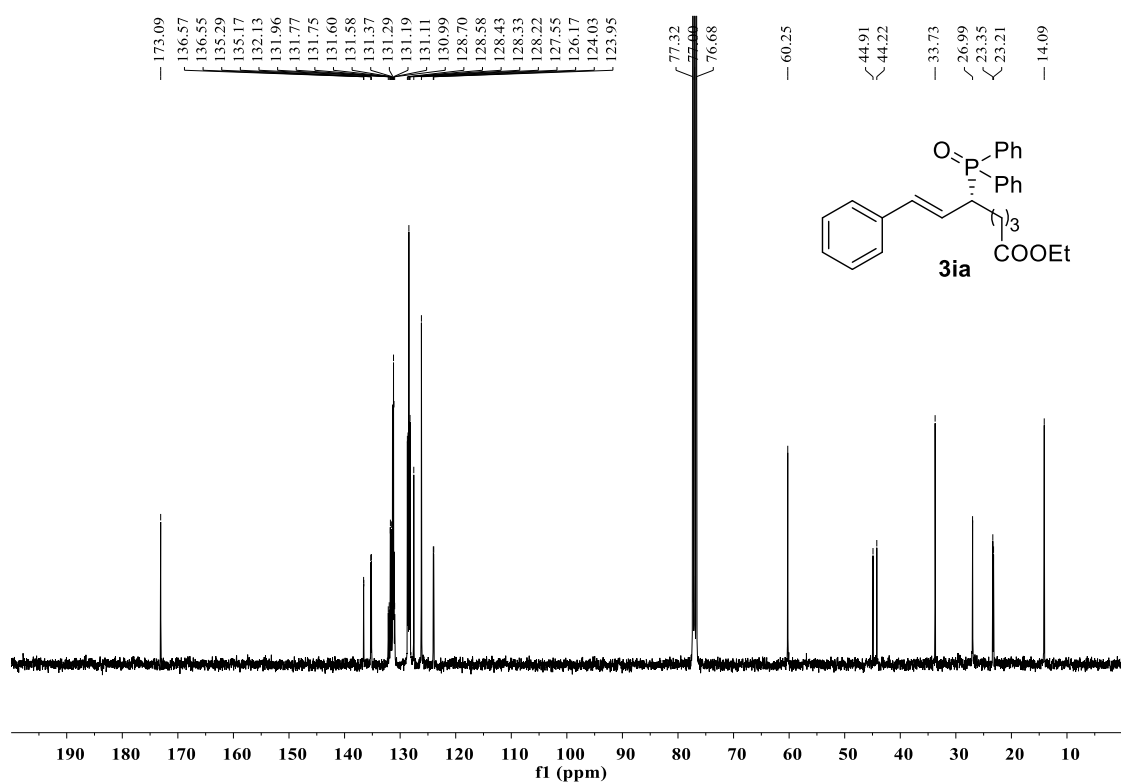

Figure S38  $^{13}\text{C}$  NMR spectra of **3ia**.



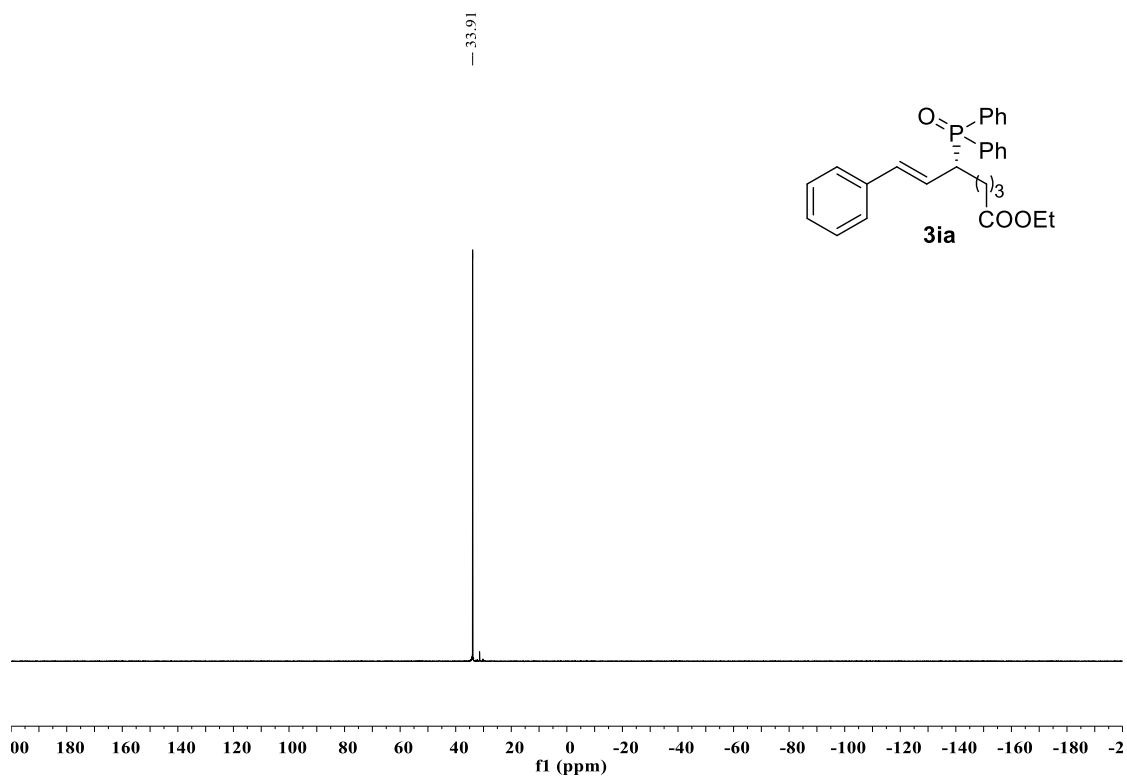

Figure S39.  $^{31}\text{P}$  NMR spectra of **3ia**.

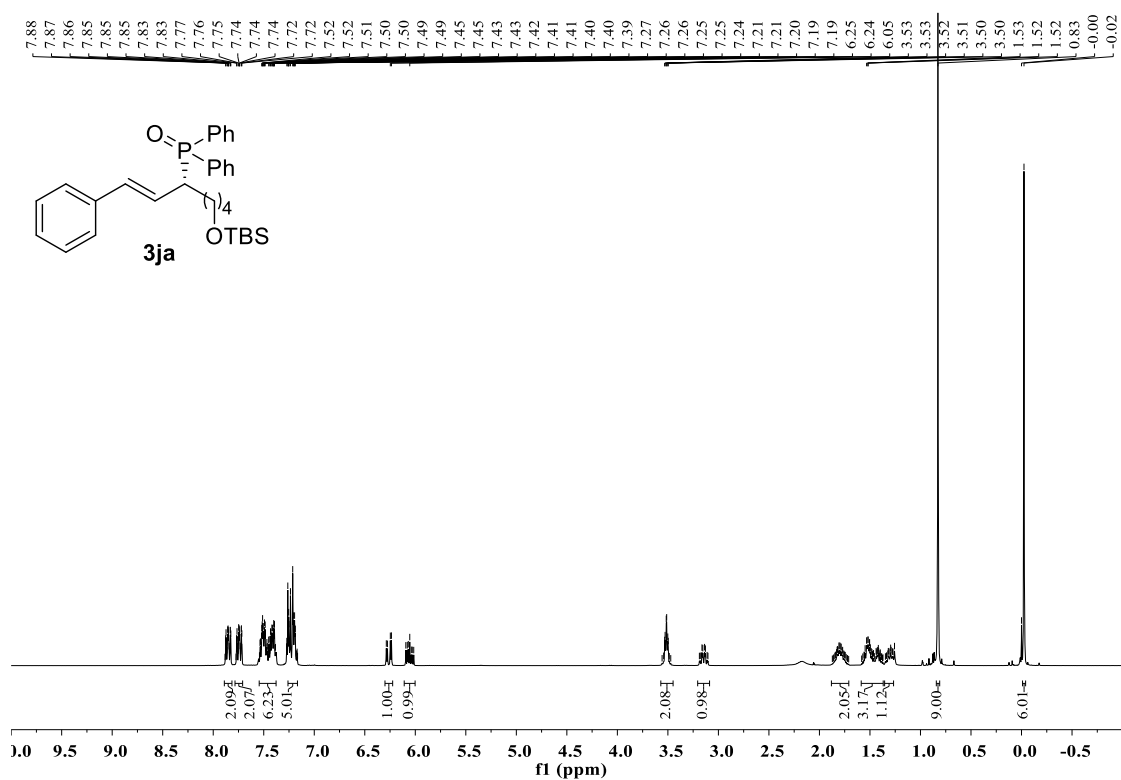

Figure S40.  $^1\text{H}$  NMR spectra of **3ja**.

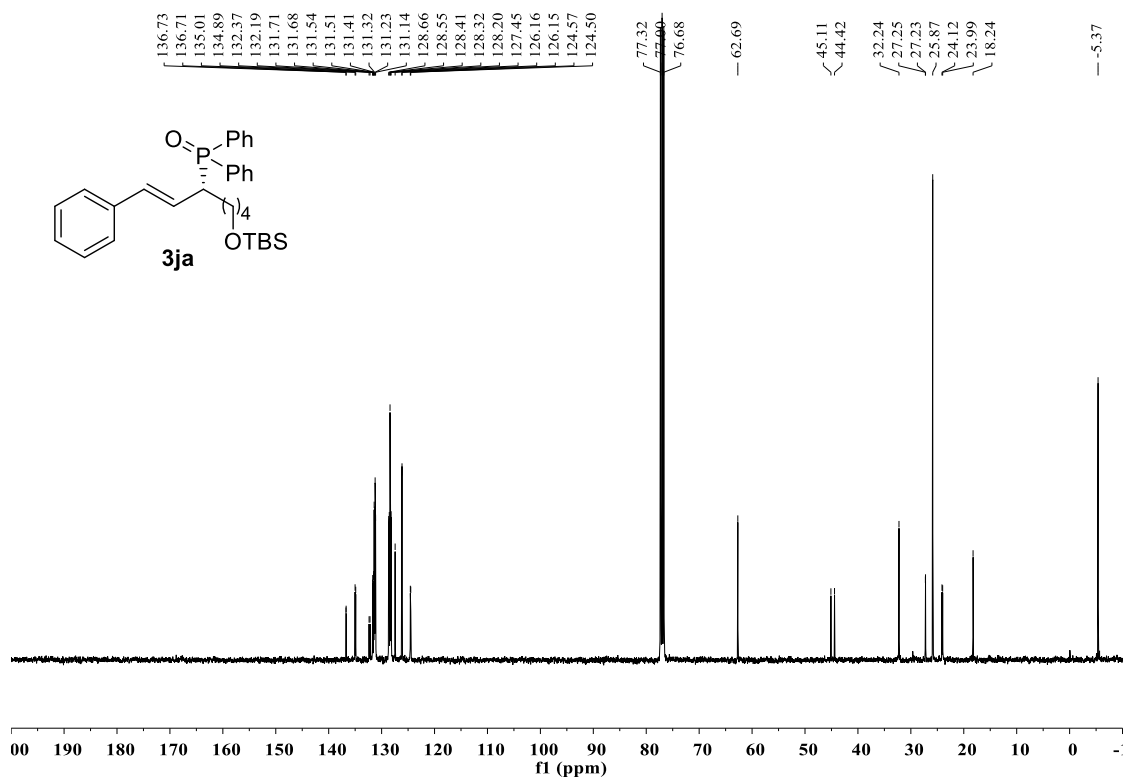

Figure S41. <sup>13</sup>C NMR spectra of **3ja**.

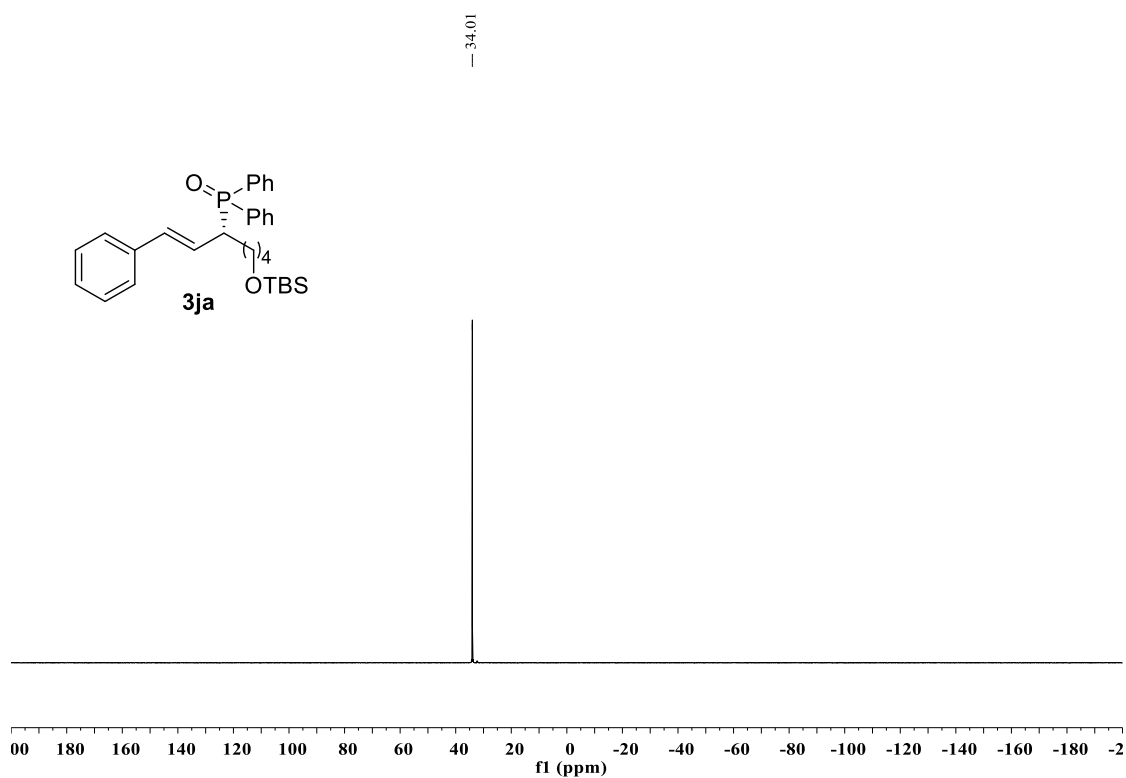

Figure S42. <sup>31</sup>P NMR spectra of **3ja**.

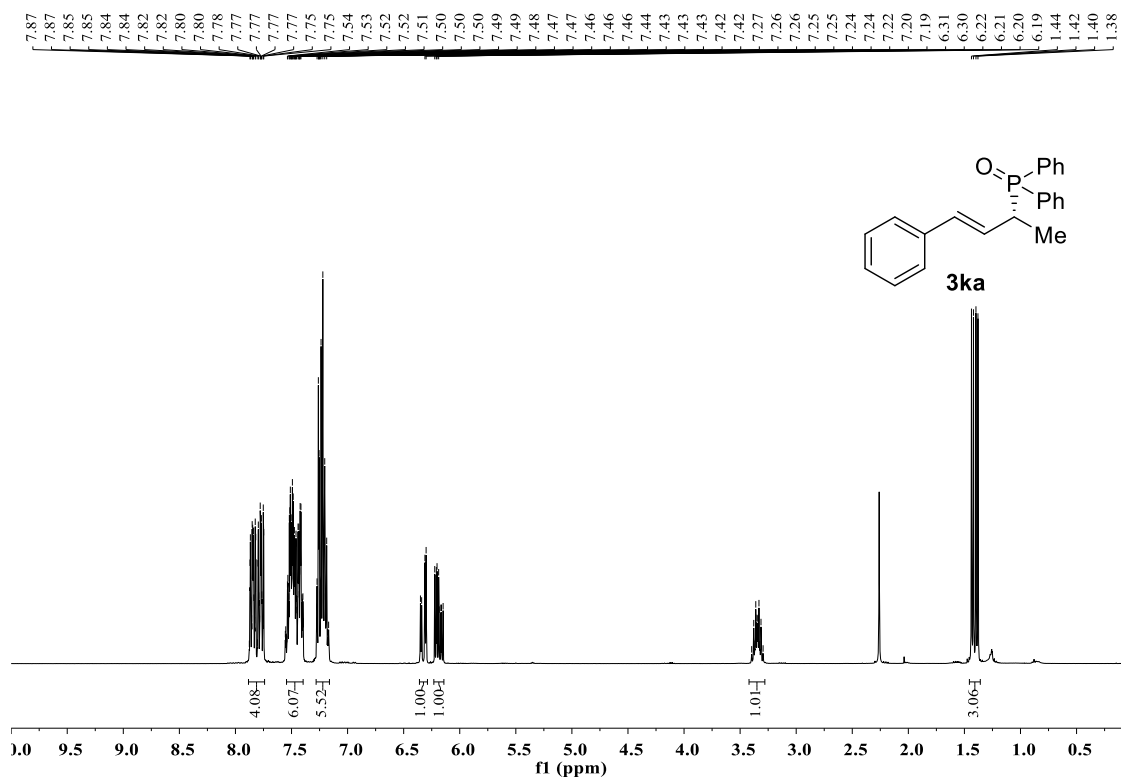

Figure S43.  $^1\text{H}$  NMR spectra of 3ka.

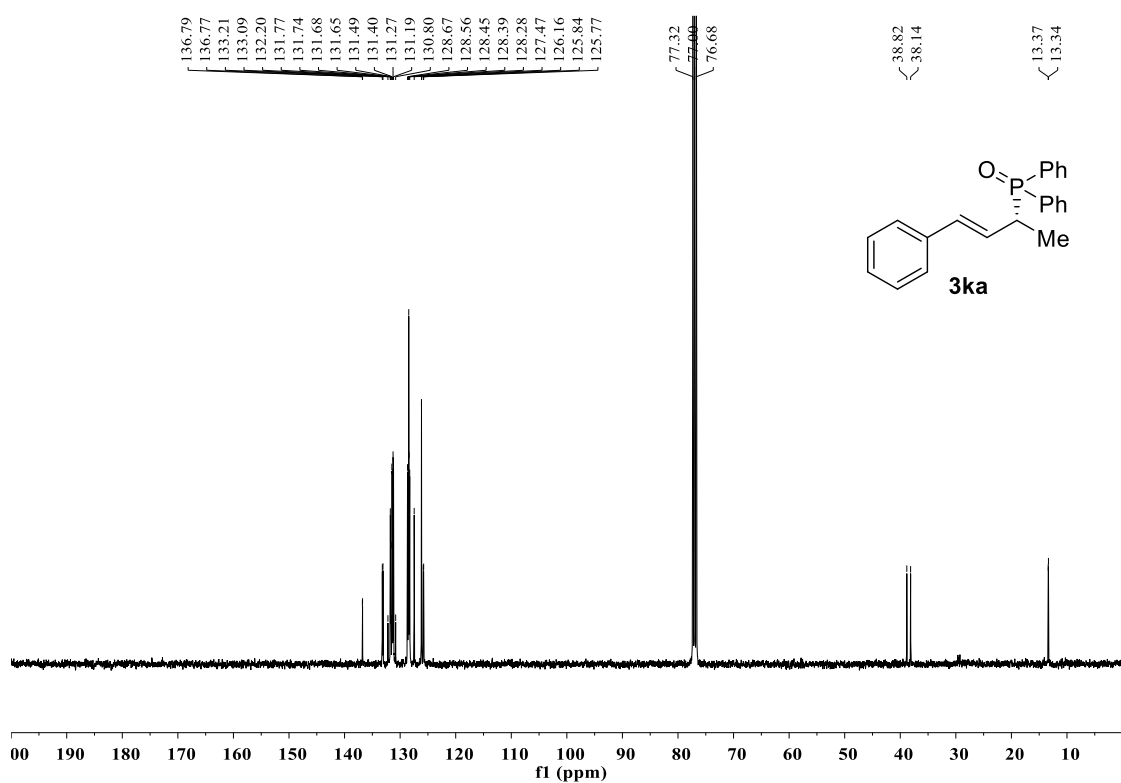

Figure S44.  $^{13}\text{C}$  NMR spectra of 3ka.

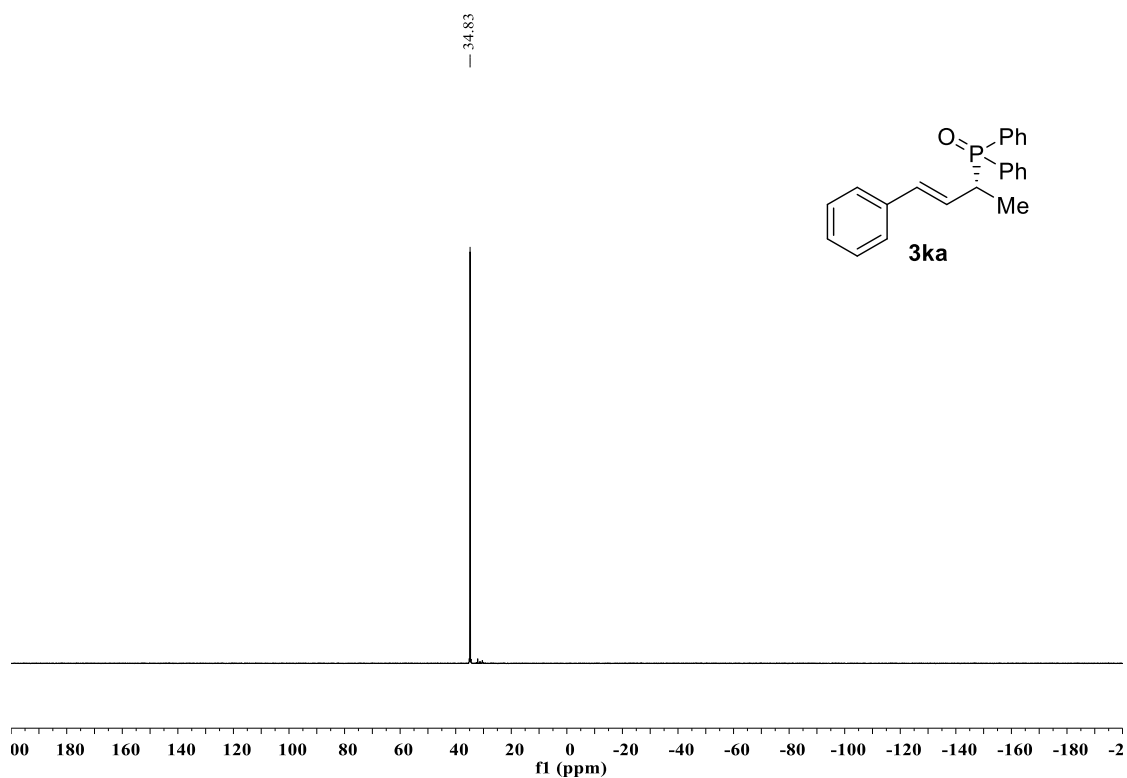

Figure S45.  $^{31}\text{P}$  NMR spectra of **3ka**.

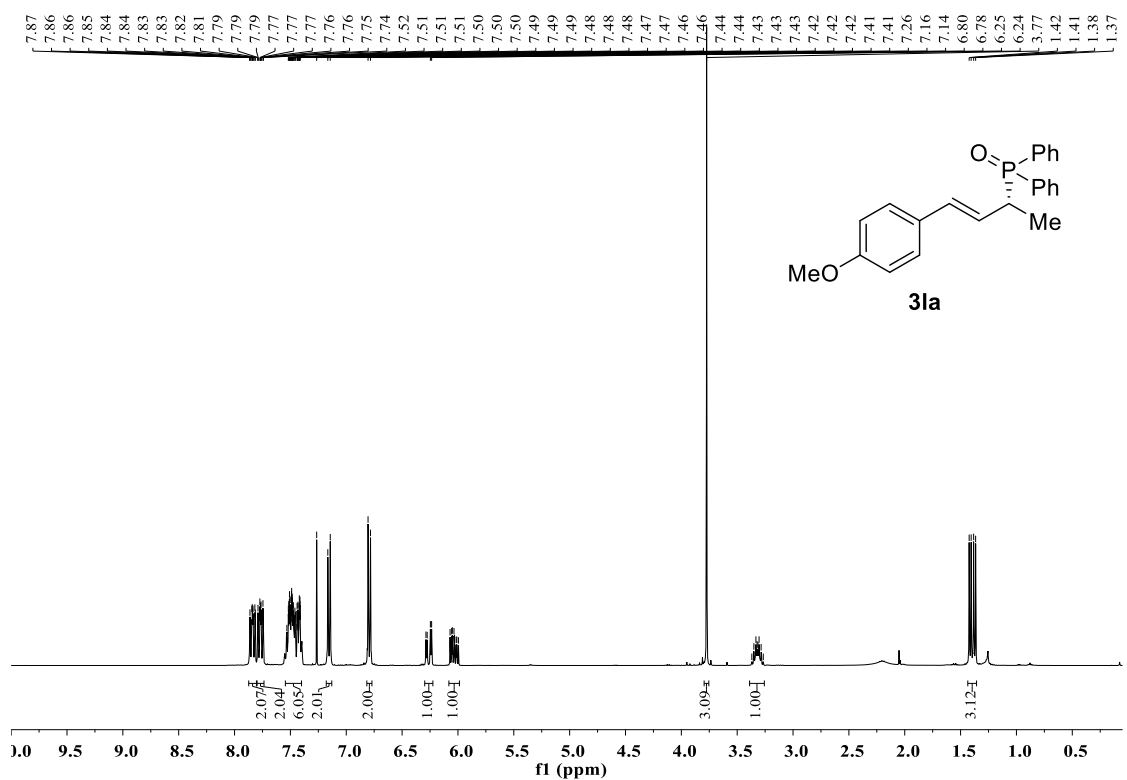

Figure S46.  $^1\text{H}$  NMR spectra of **3la**.

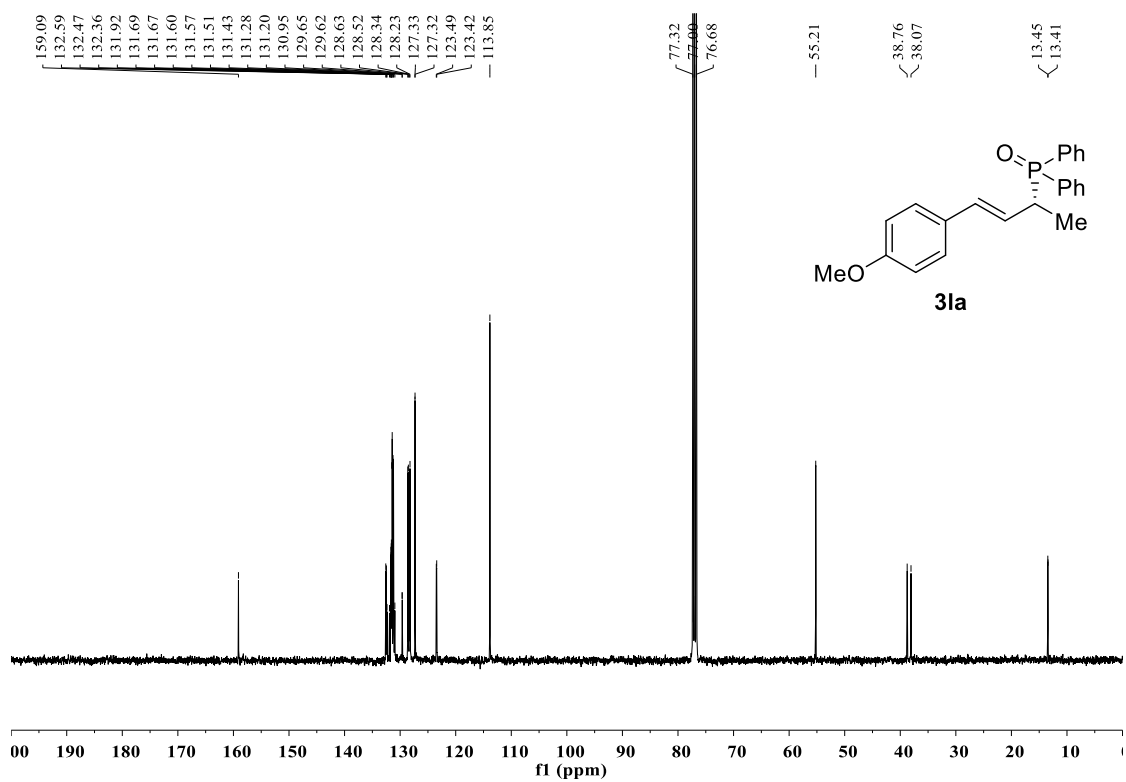

Figure S47. <sup>13</sup>C NMR spectra of 3la.

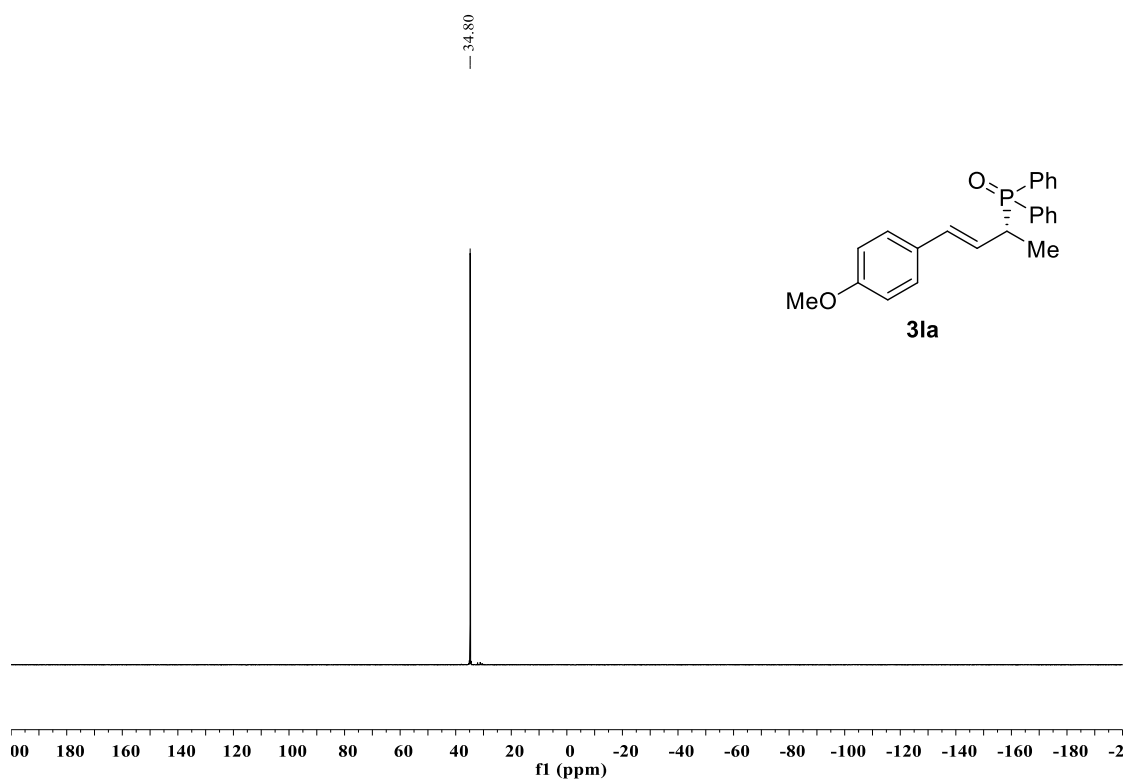

Figure S48. <sup>31</sup>P NMR spectra of 3la.

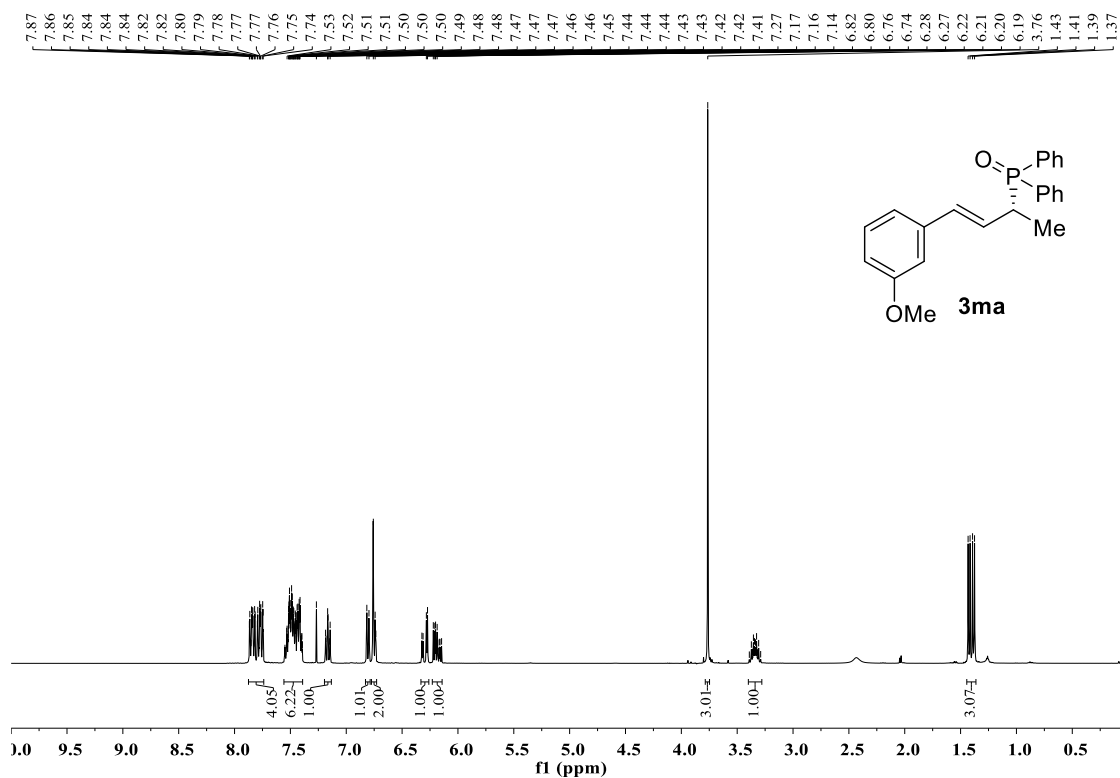

Figure S49. <sup>1</sup>H NMR spectra of **3ma**.

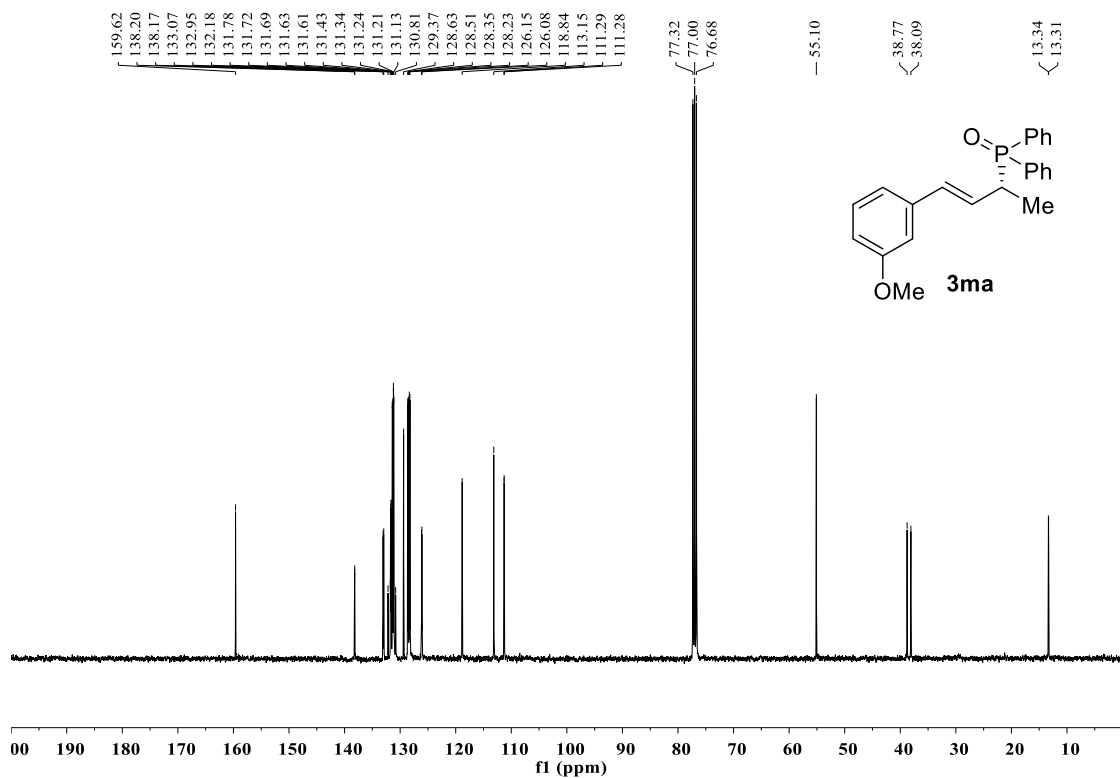

Figure S50. <sup>13</sup>C NMR spectra of **3ma**.

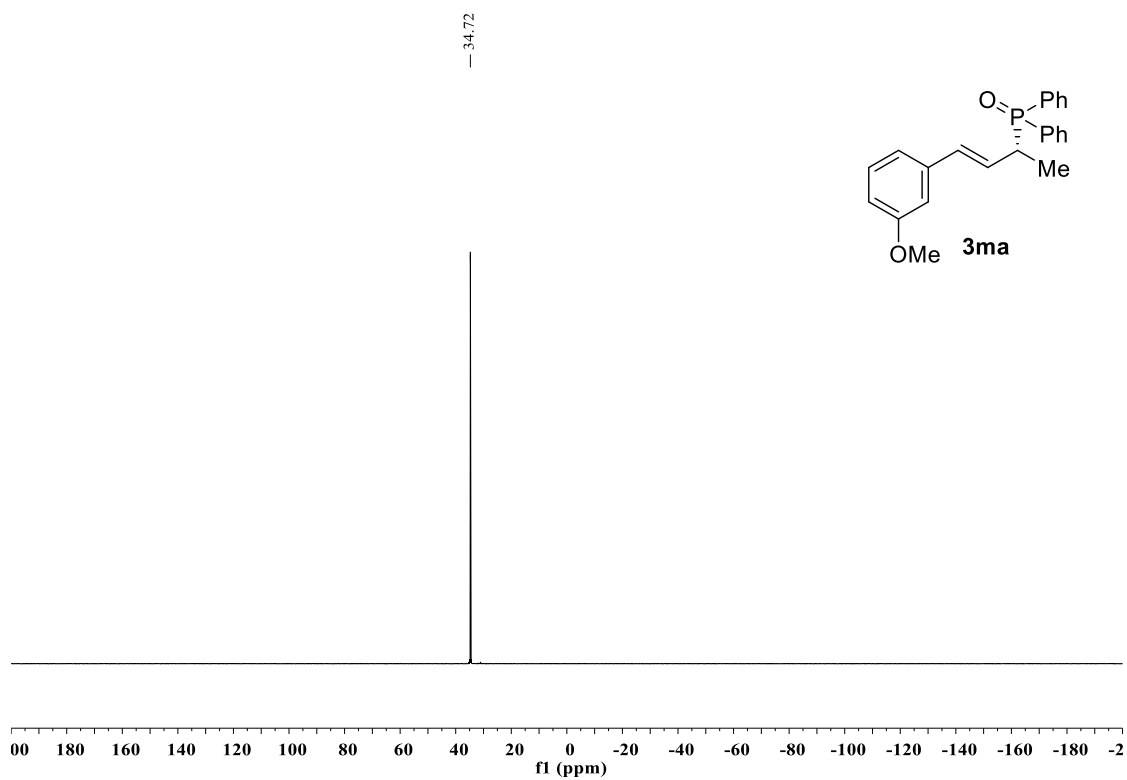

Figure S51. <sup>31</sup>P NMR spectra of **3ma**.

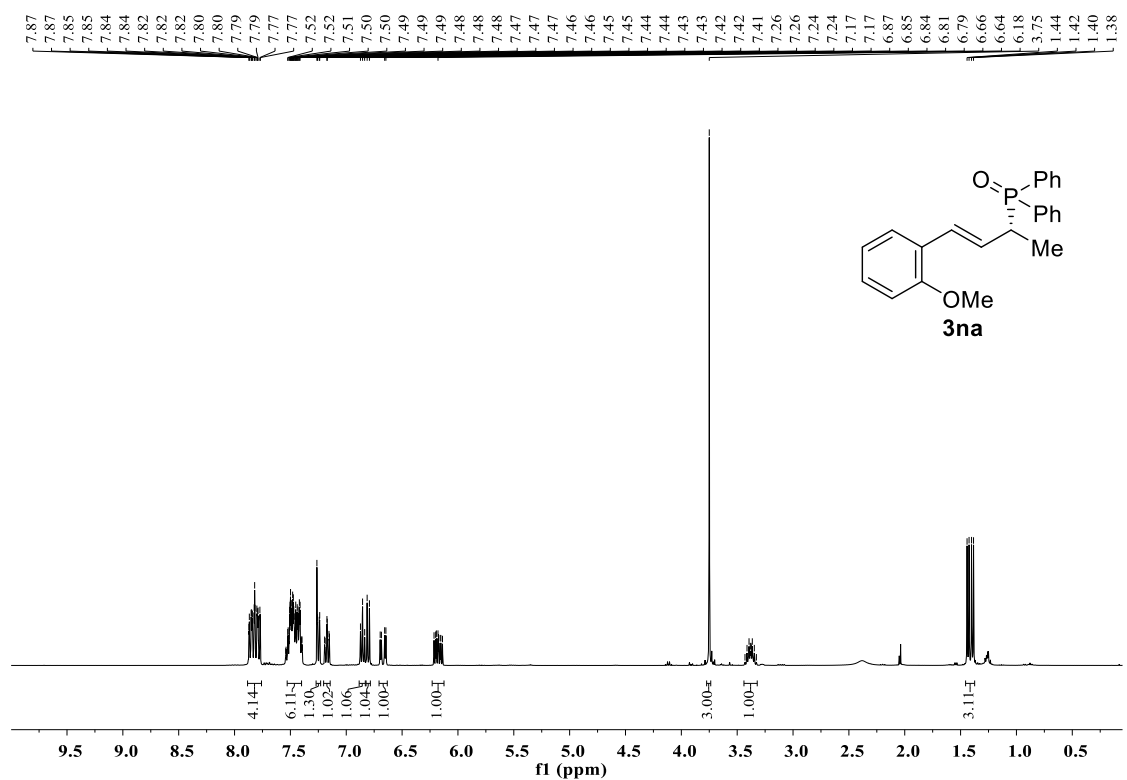

Figure S52. <sup>1</sup>H NMR spectra of **3na**.

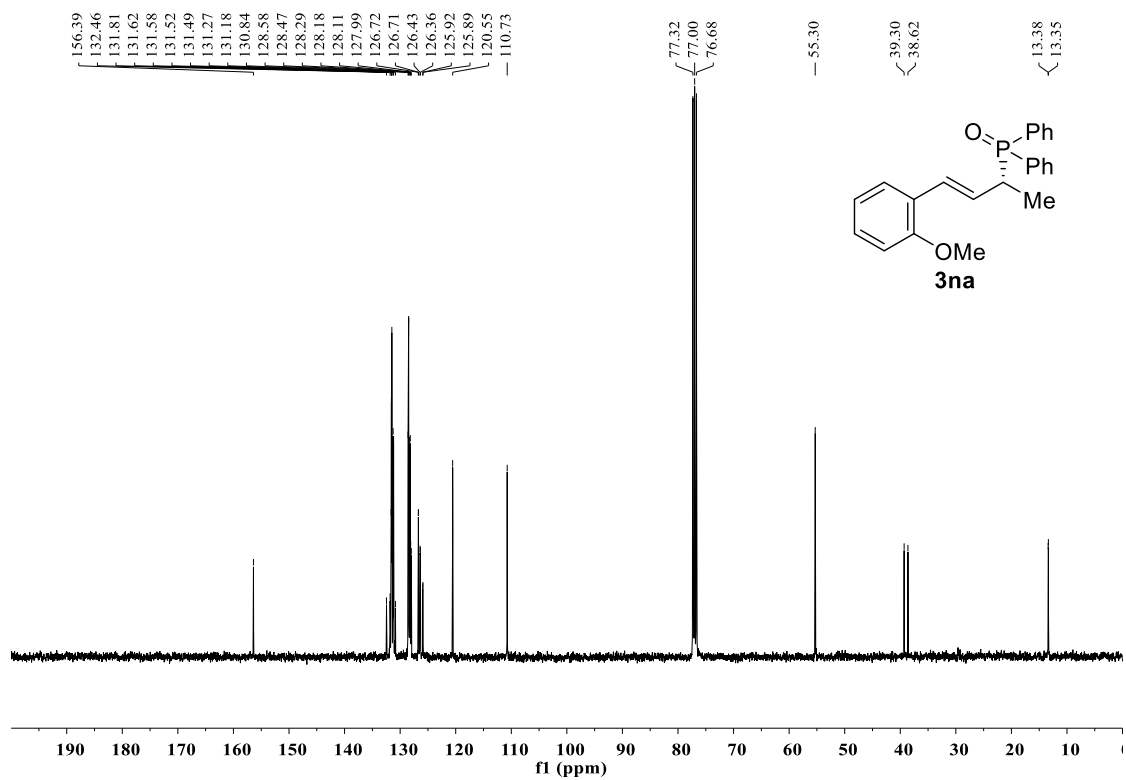

Figure S53. <sup>13</sup>C NMR spectra of **3na**.

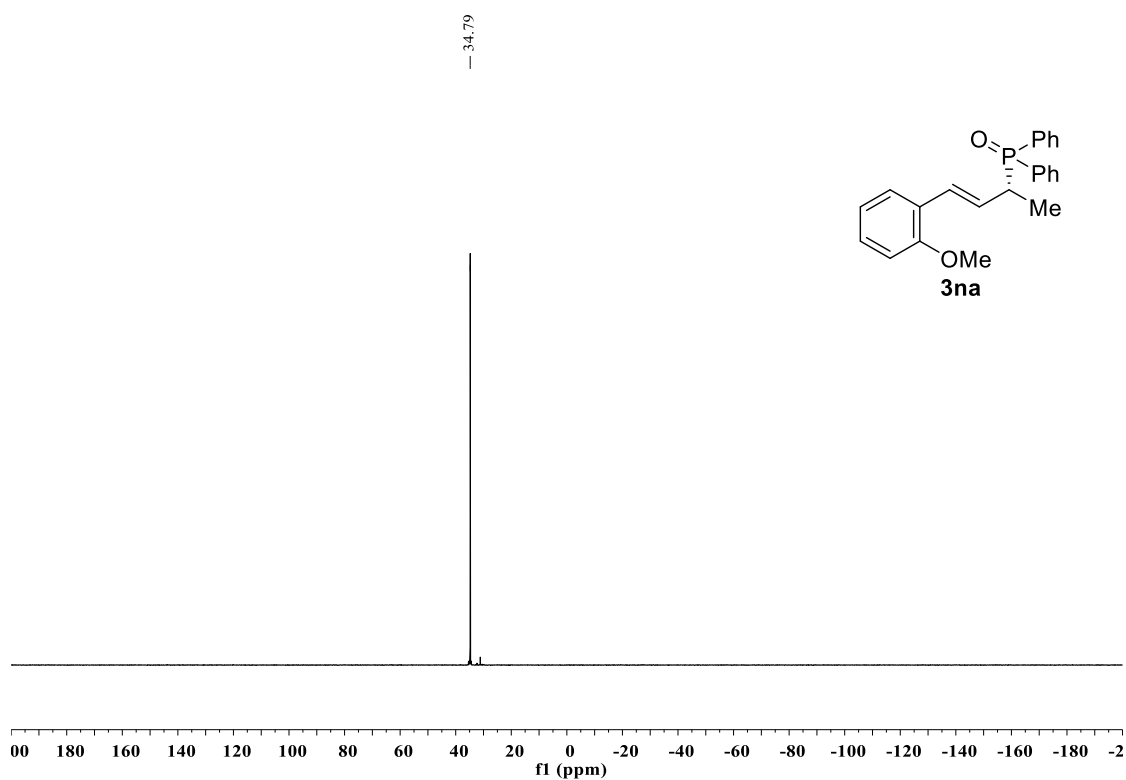

Figure S54. <sup>31</sup>P NMR spectra of **3na**.



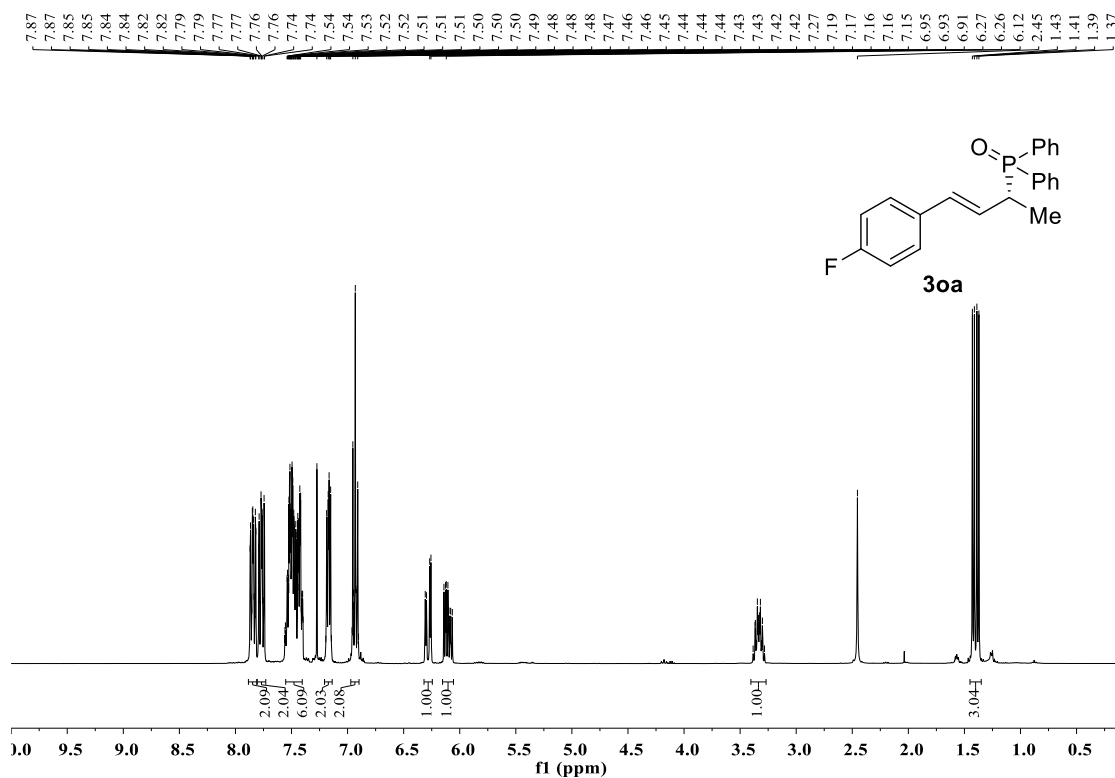

Figure S55. <sup>1</sup>H NMR spectra of 30a.

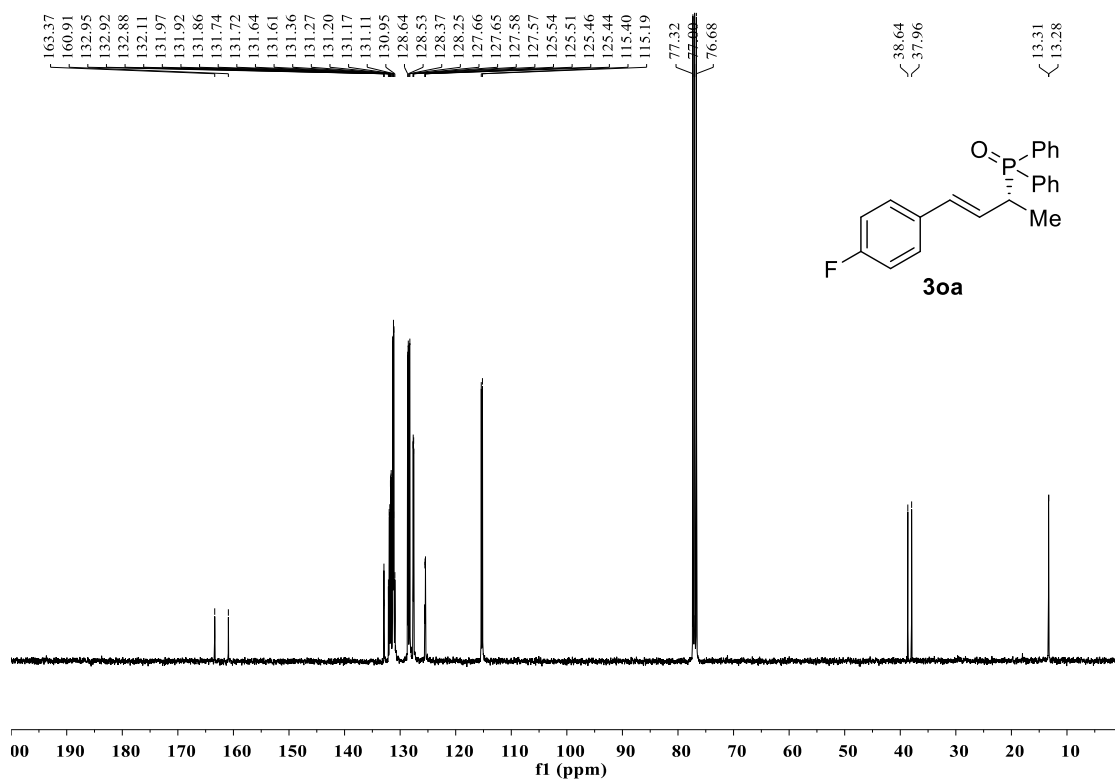

Figure S56. <sup>13</sup>C NMR spectra of 30a.

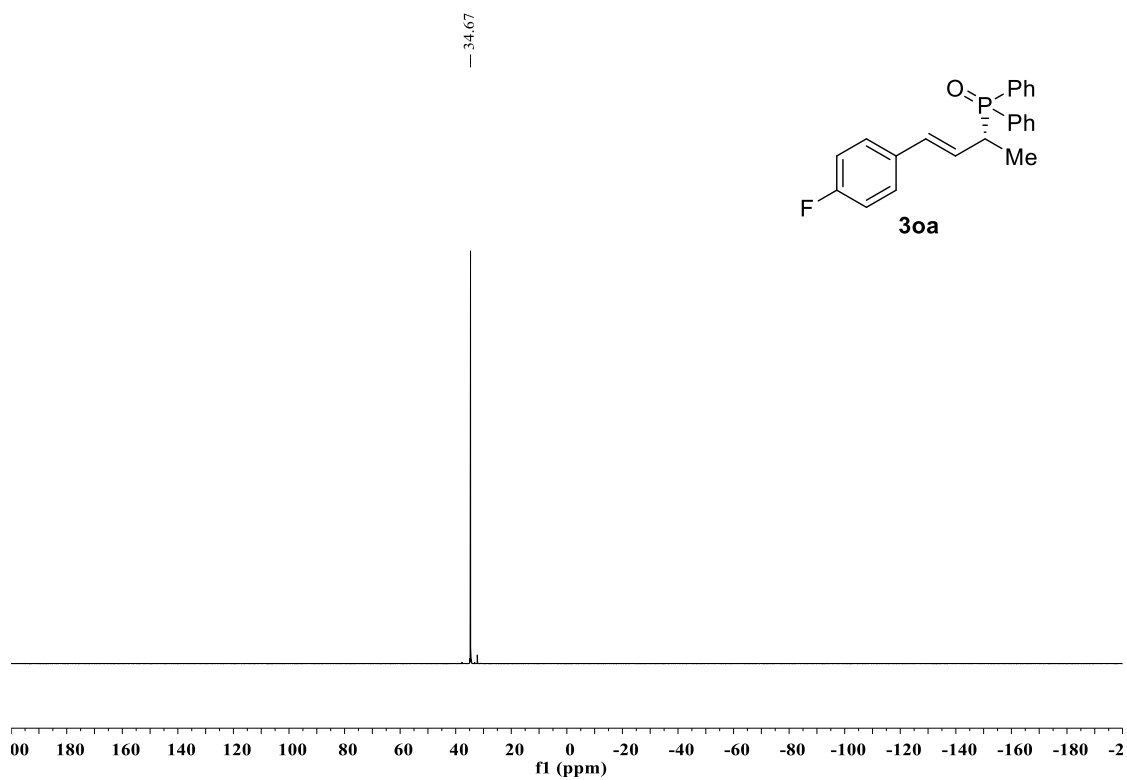

Figure S57.  $^{31}\text{P}$  NMR spectra of **30a**.

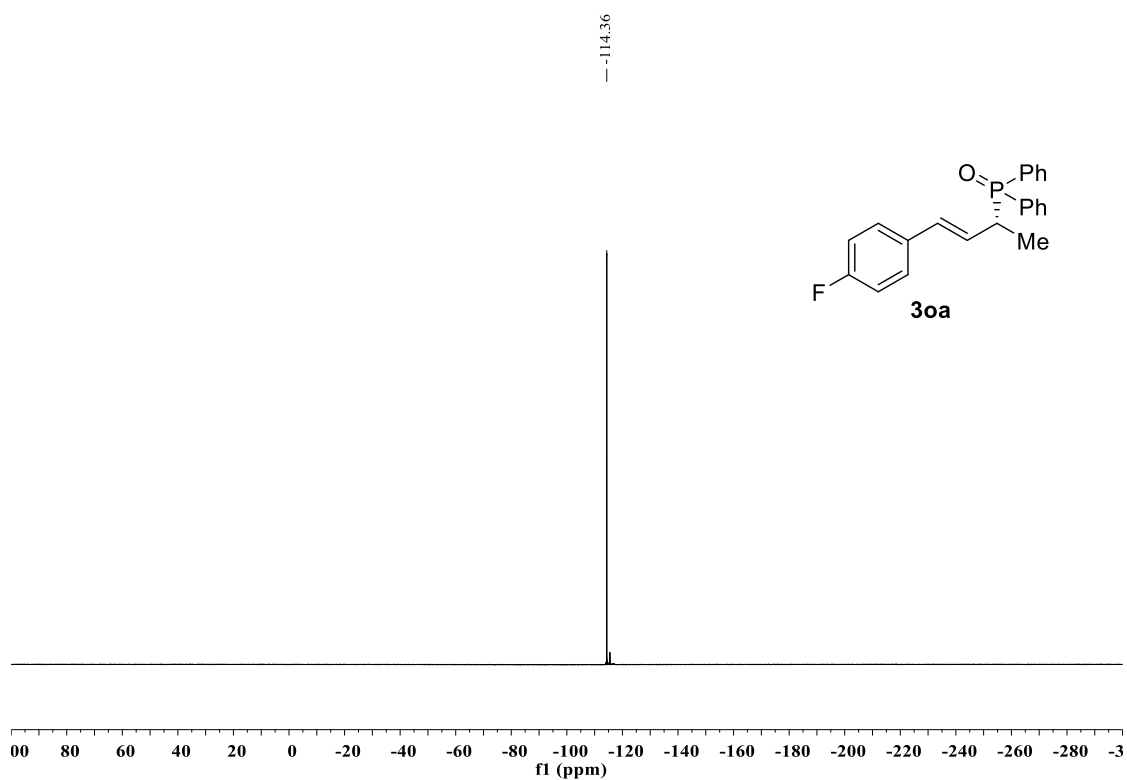

Figure S58.  $^{19}\text{F}$  NMR spectra of **30a**.

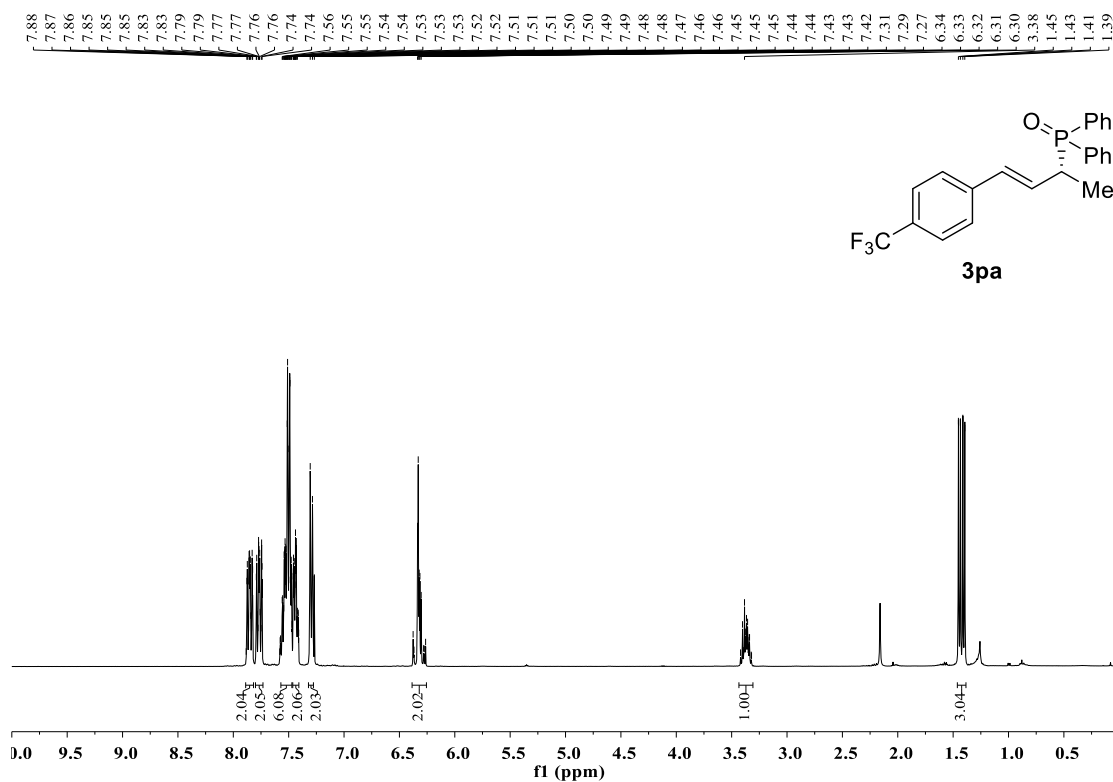

Figure S59. <sup>1</sup>H NMR spectra of 3pa.

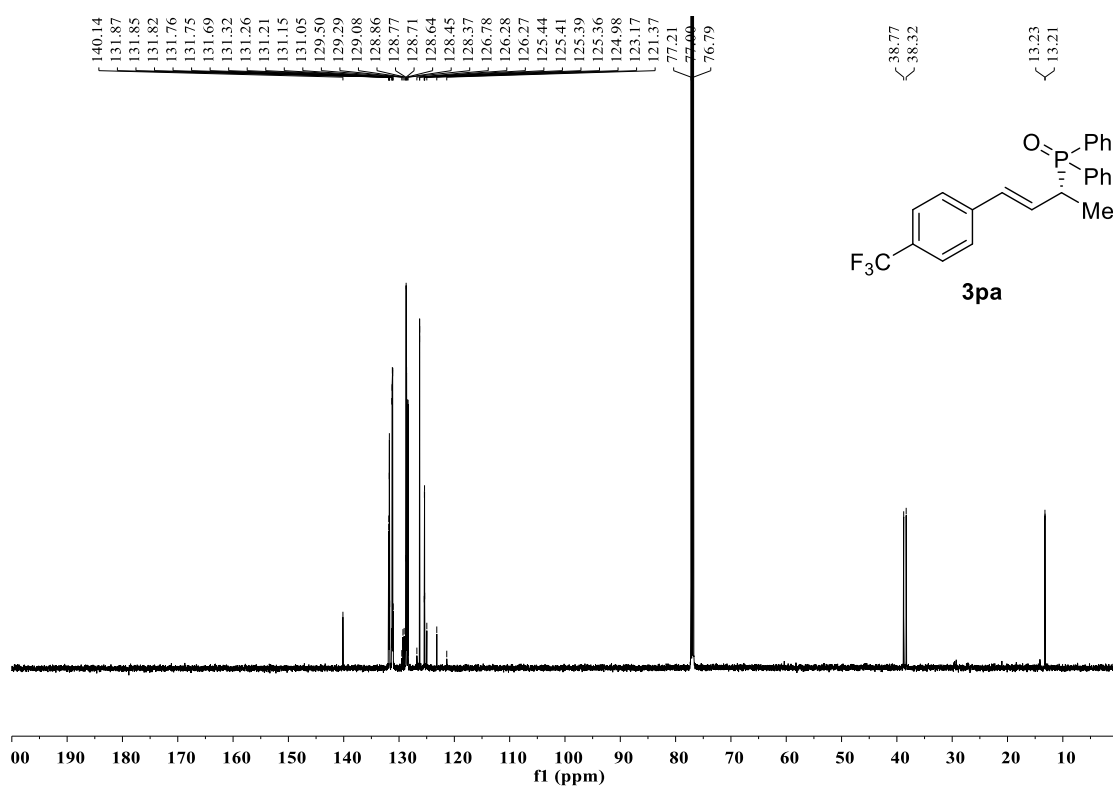

Figure S60. <sup>13</sup>C NMR spectra of 3pa.

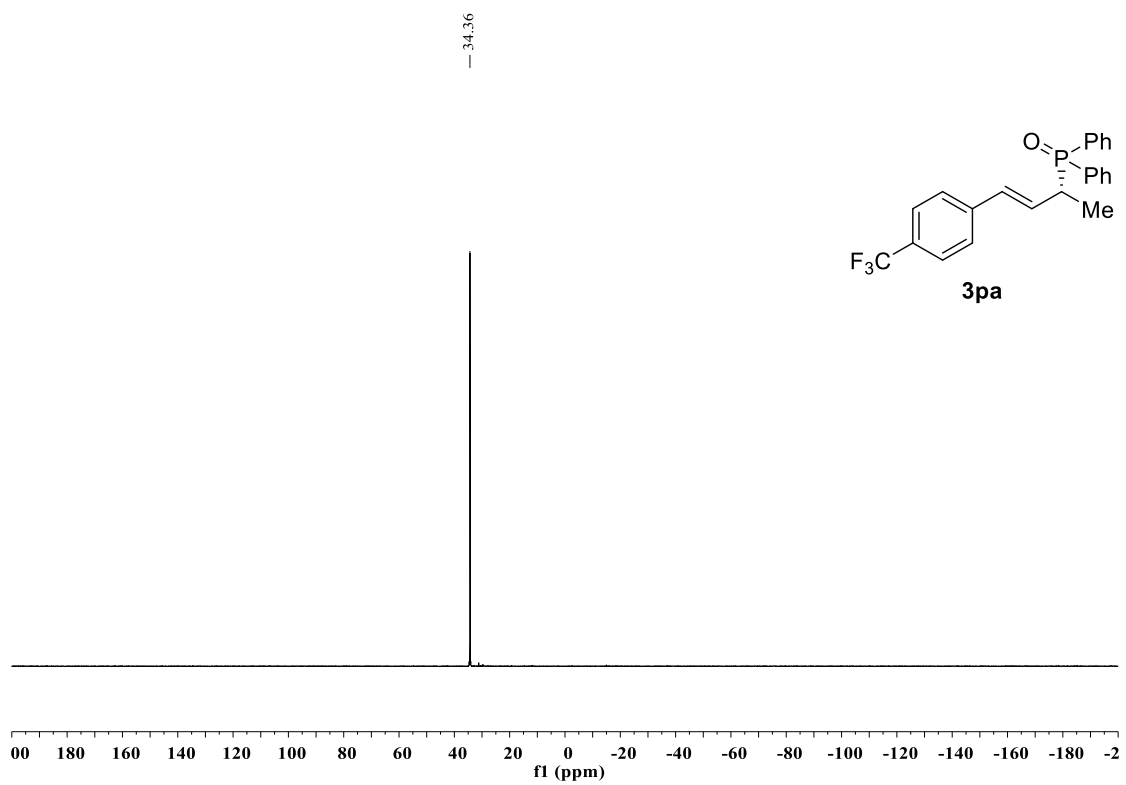

Figure S61.  $^{31}\text{P}$  NMR spectra of **3pa**.

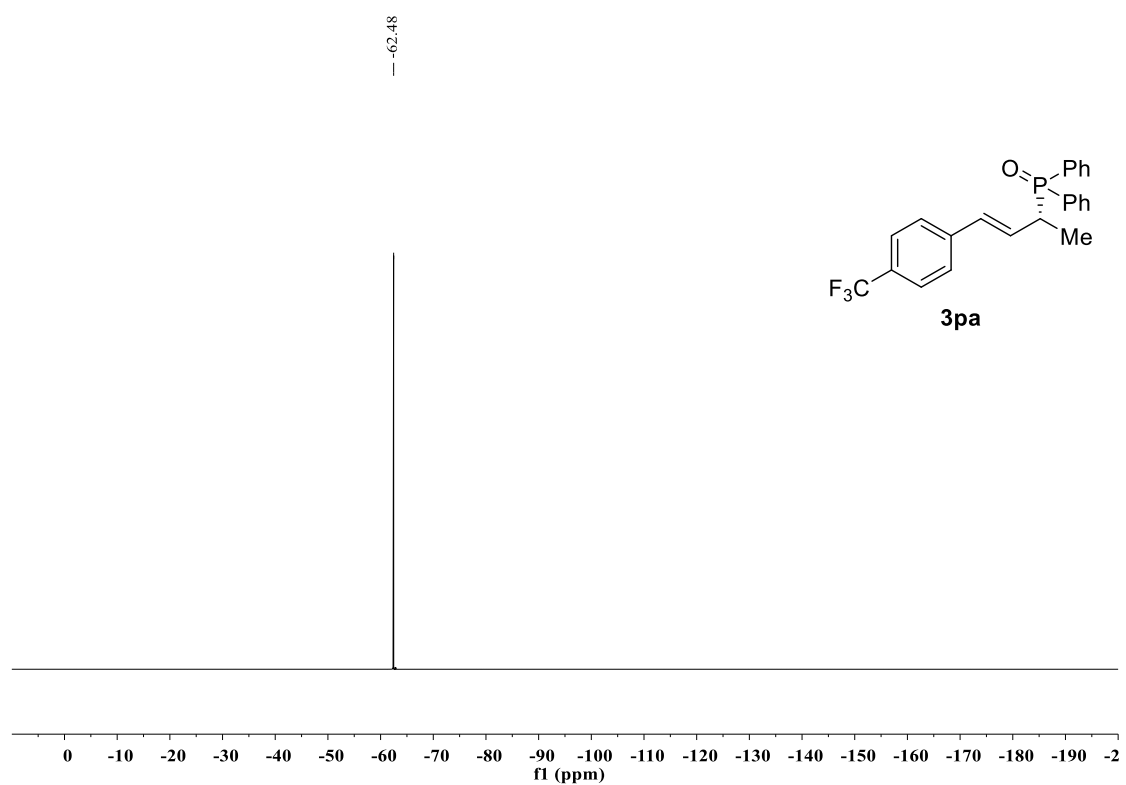

Figure S62.  $^{19}\text{F}$  NMR spectra of **3pa**.

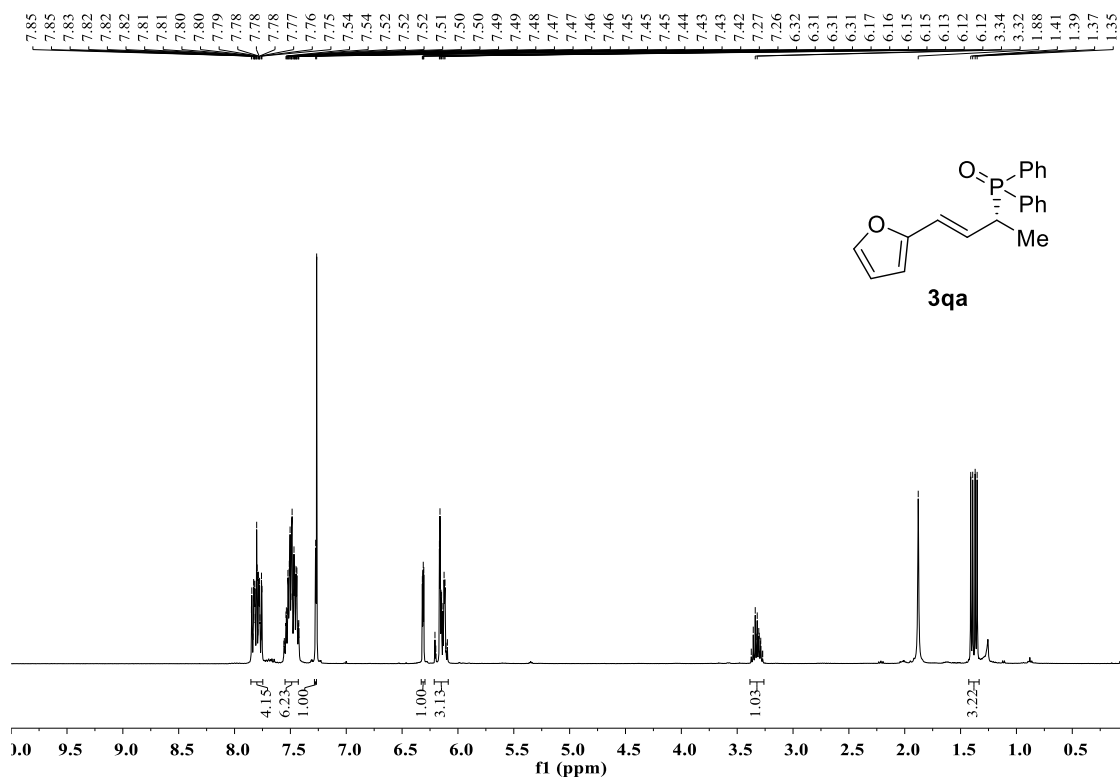

Figure S63.  $^1\text{H}$  NMR spectra of 3qa.

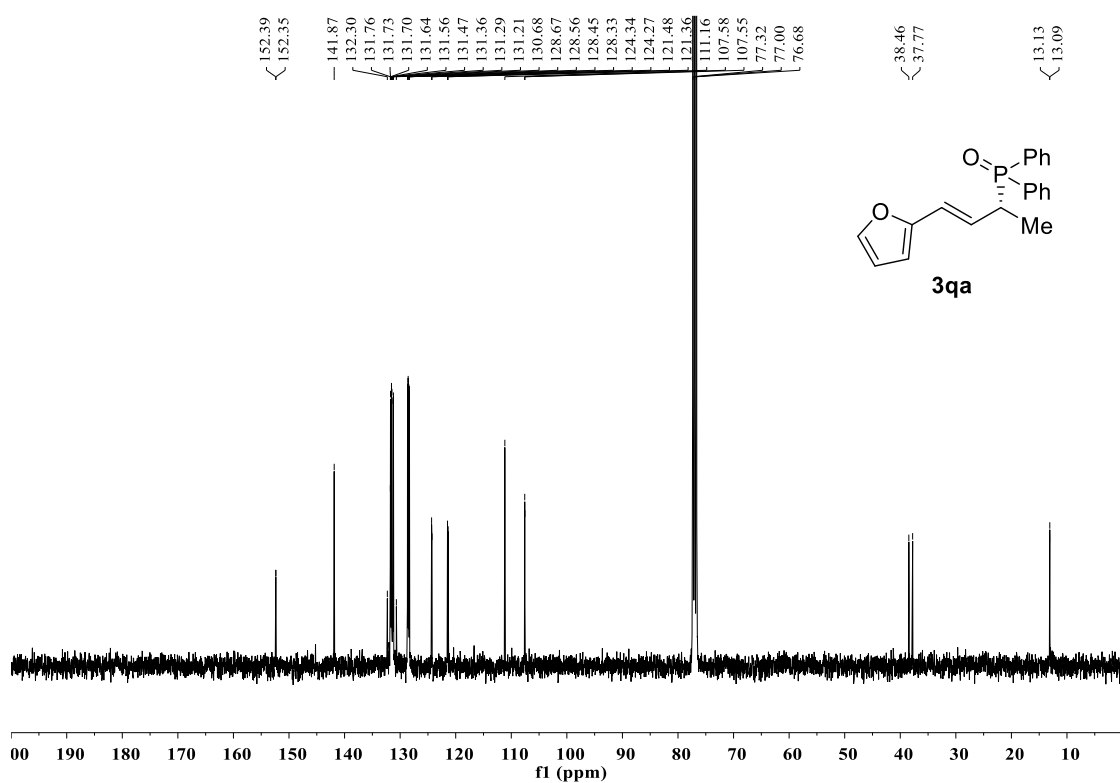

Figure S64.  $^{13}\text{C}$  NMR spectra of 3qa.

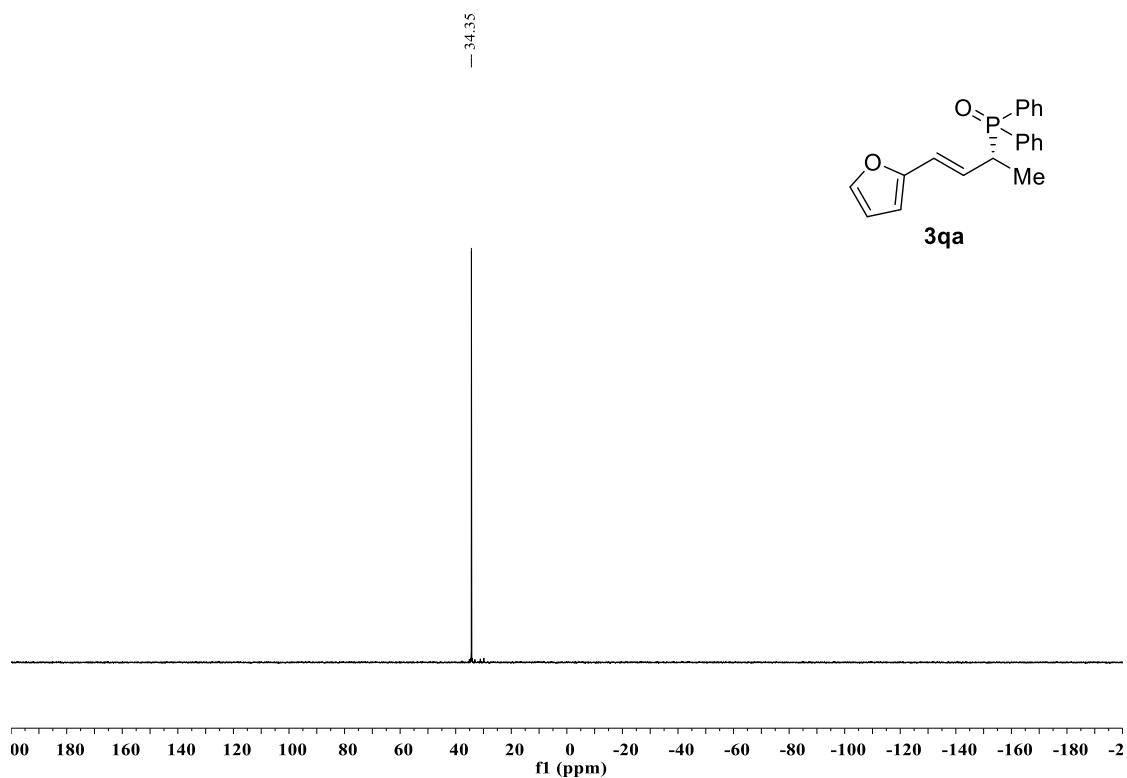

Figure S65. <sup>31</sup>P NMR spectra of 3qa.

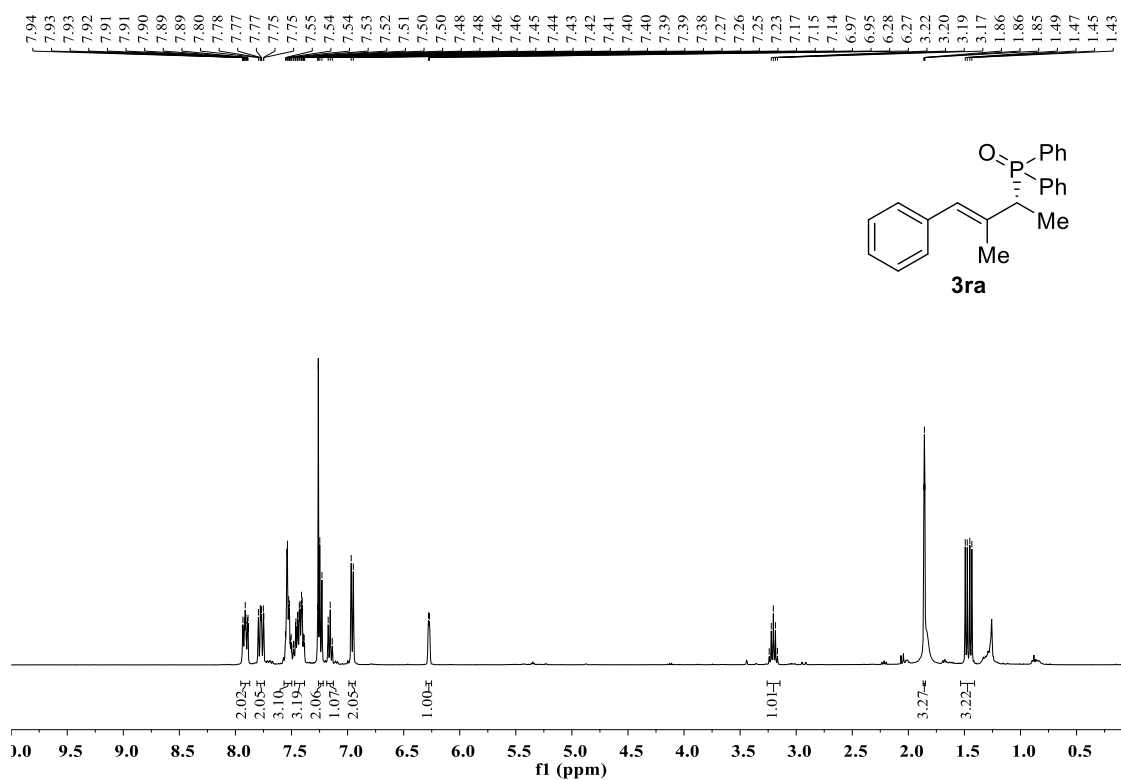

Figure S66. <sup>1</sup>H NMR spectra of 3ra.

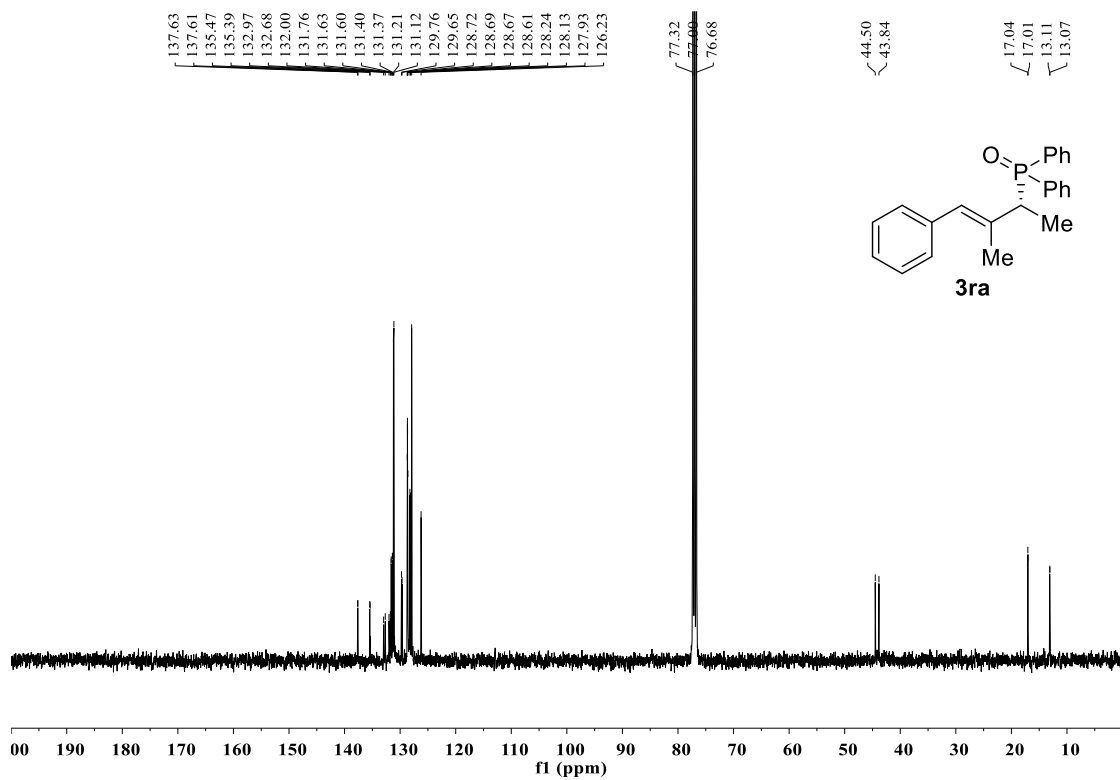

Figure S67. <sup>13</sup>C NMR spectra of **3ra**.

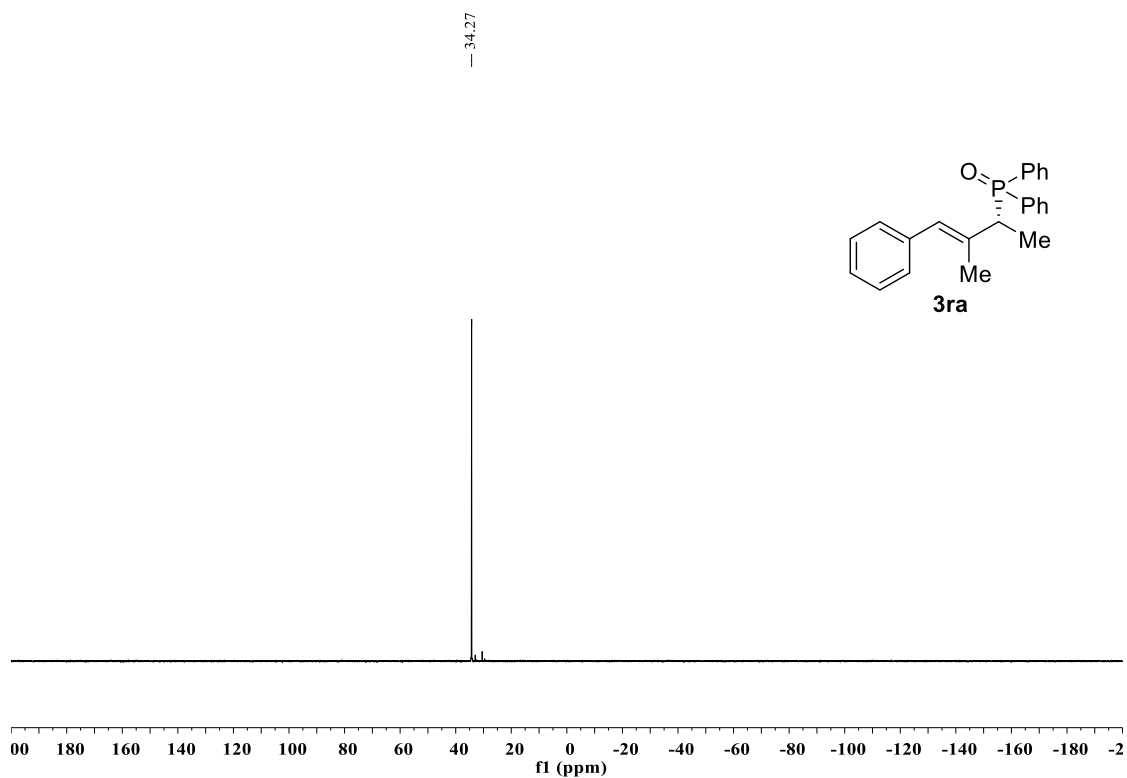

Figure S68. <sup>31</sup>P NMR spectra of **3ra**.

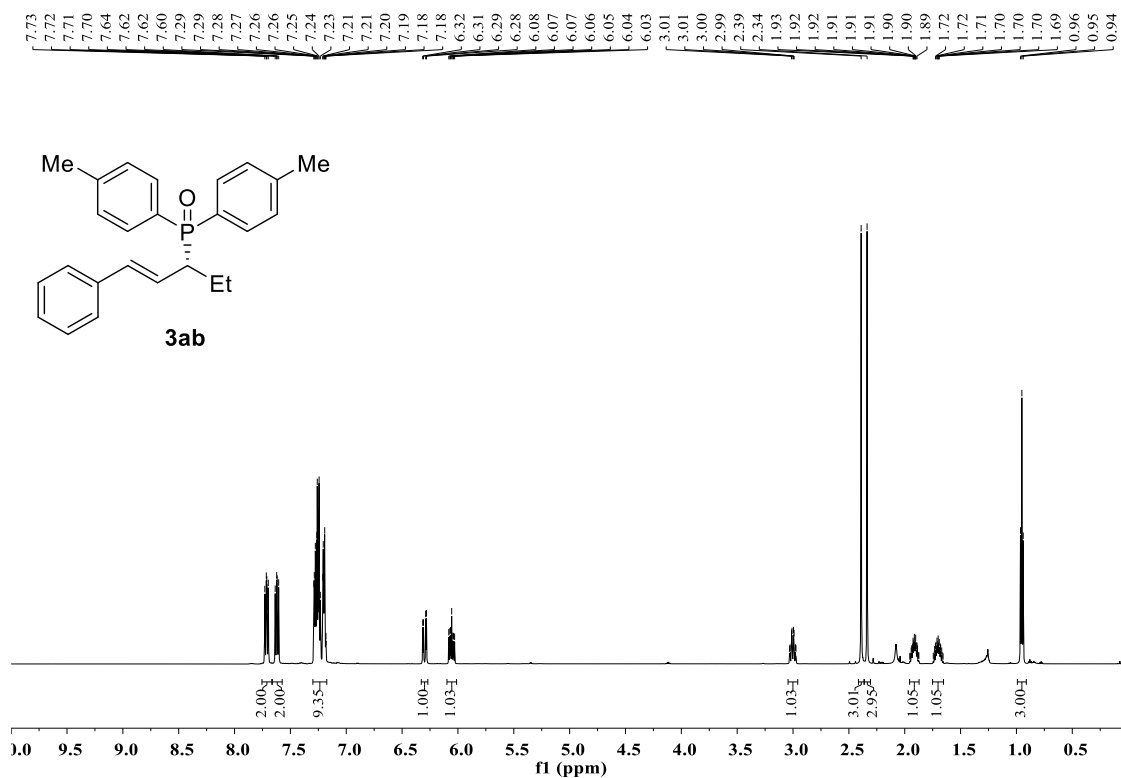

Figure S69. <sup>1</sup>H NMR spectra of **3ab**.

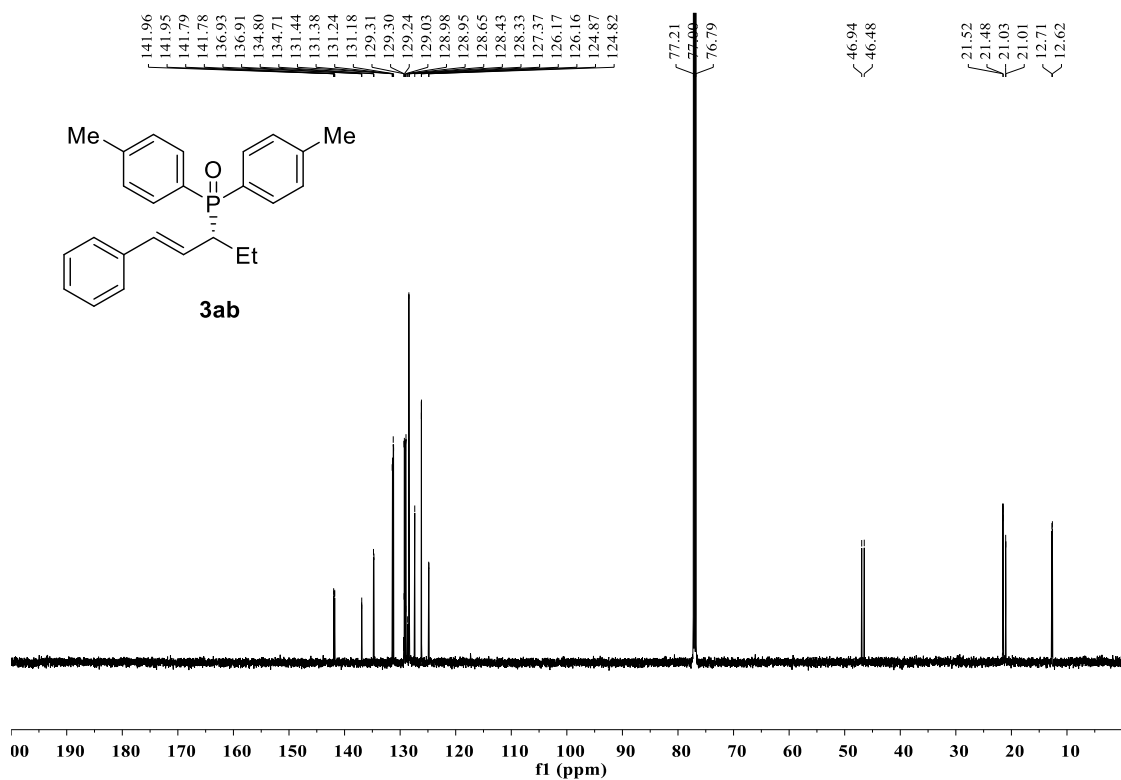

Figure S70. <sup>13</sup>C NMR spectra of **3ab**.



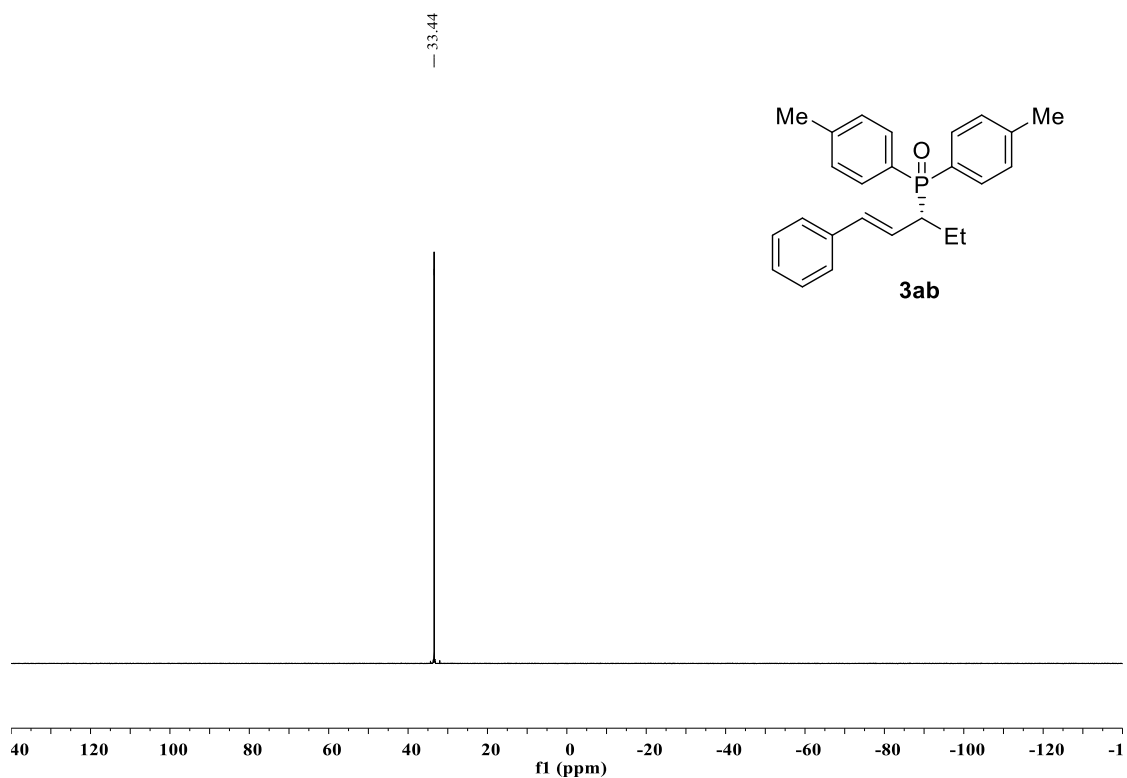

Figure S71.  $^{31}\text{P}$  NMR spectra of **3ab**.

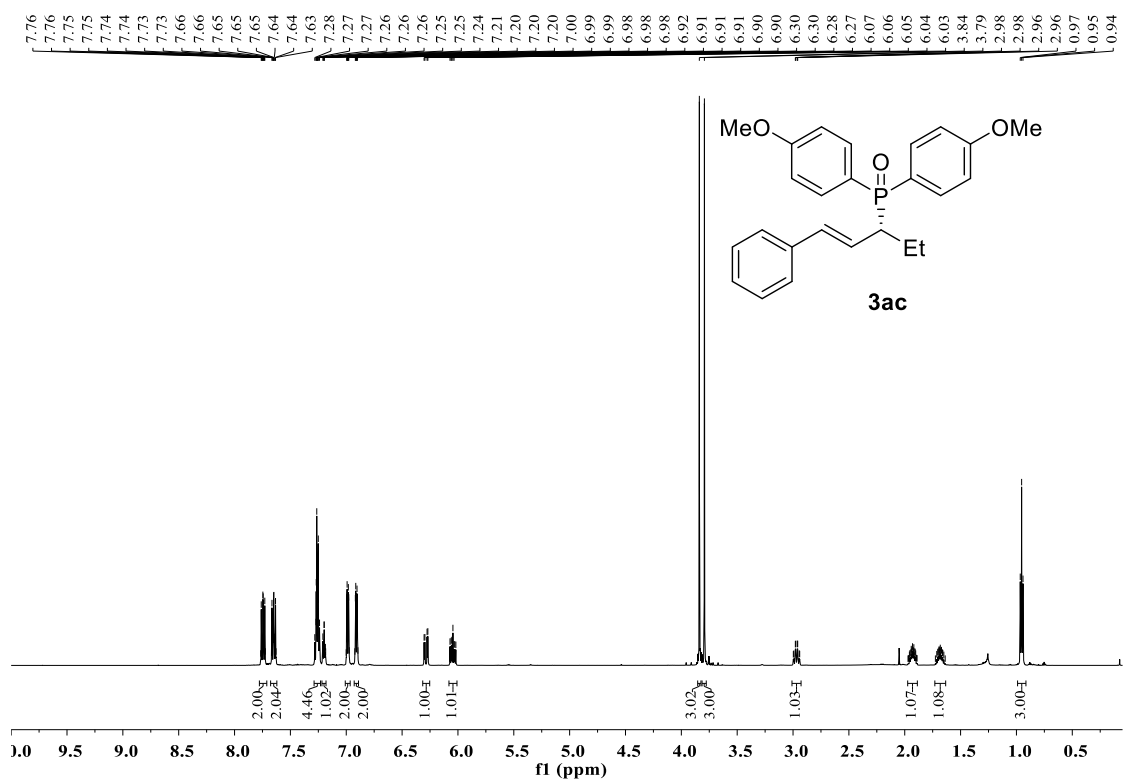

Figure S72.  $^1\text{H}$  NMR spectra of **3ac**.

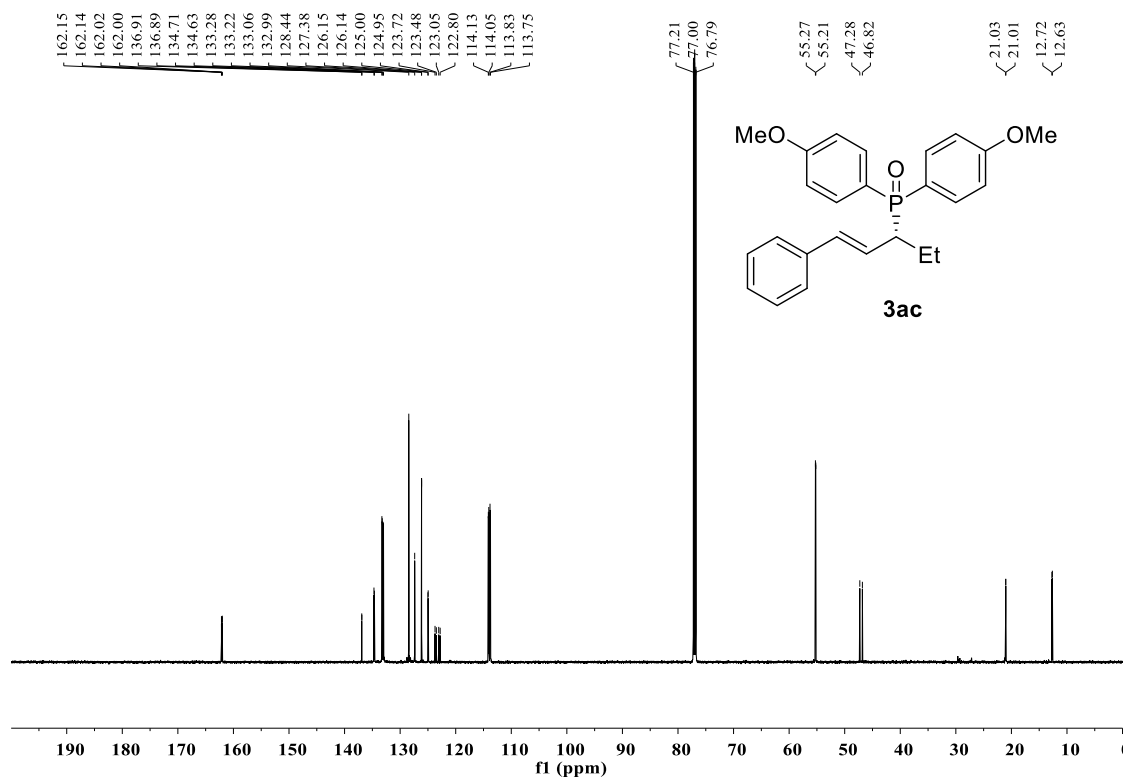

Figure S73. <sup>13</sup>C NMR spectra of **3ac**.

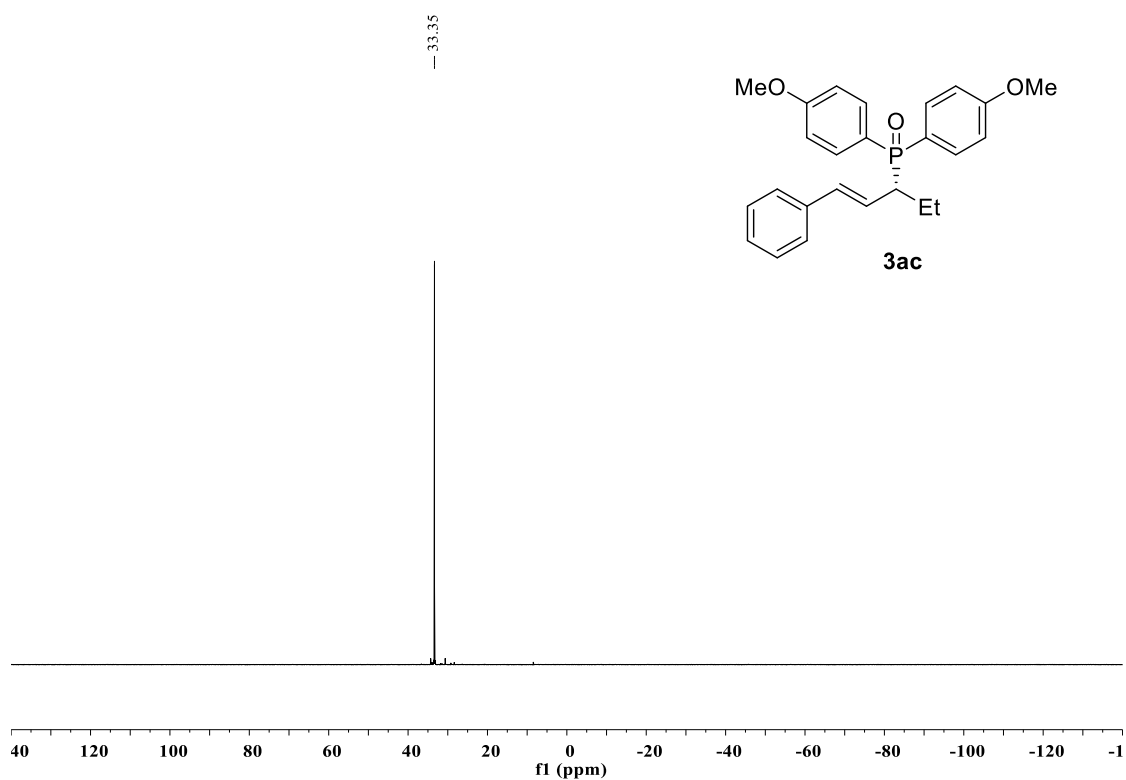

Figure S74. <sup>13</sup>P NMR spectra of **3ac**.

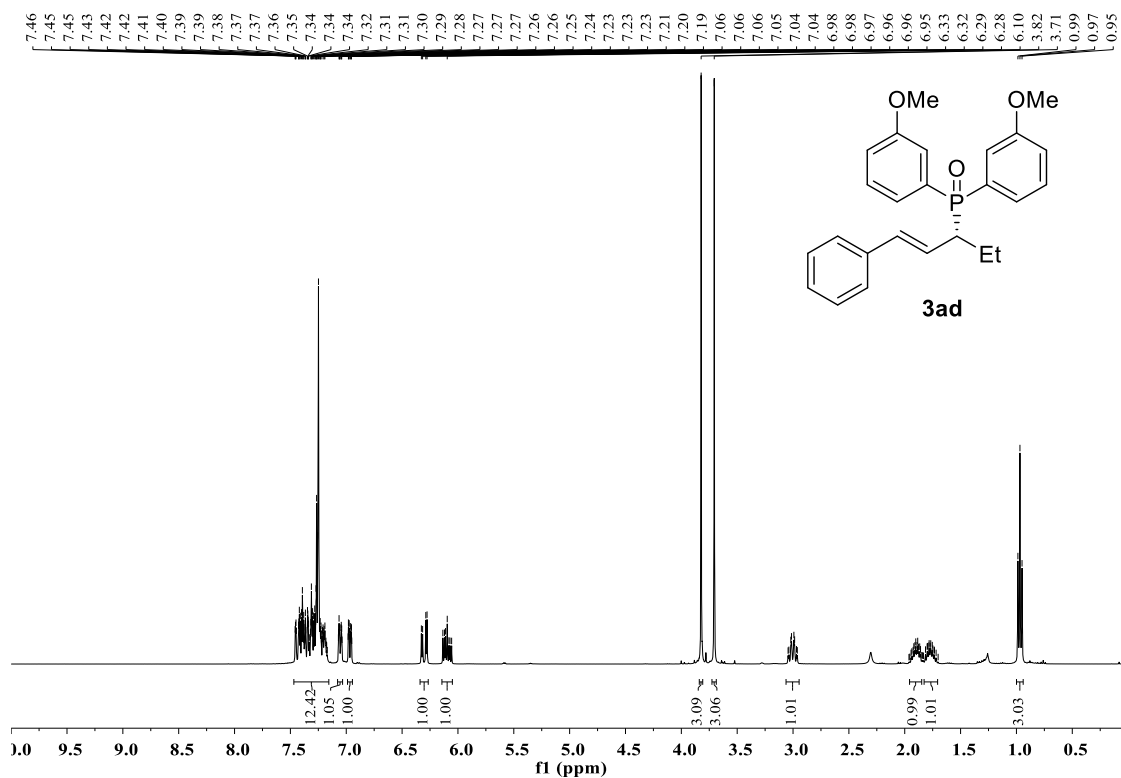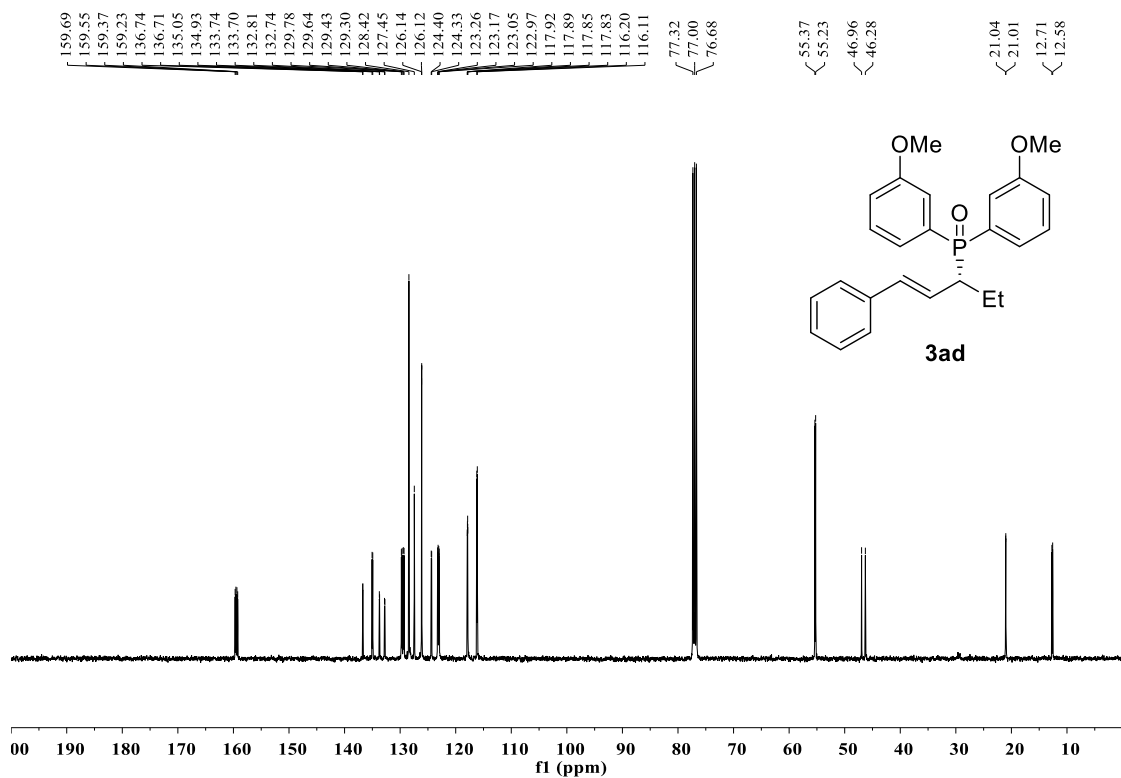

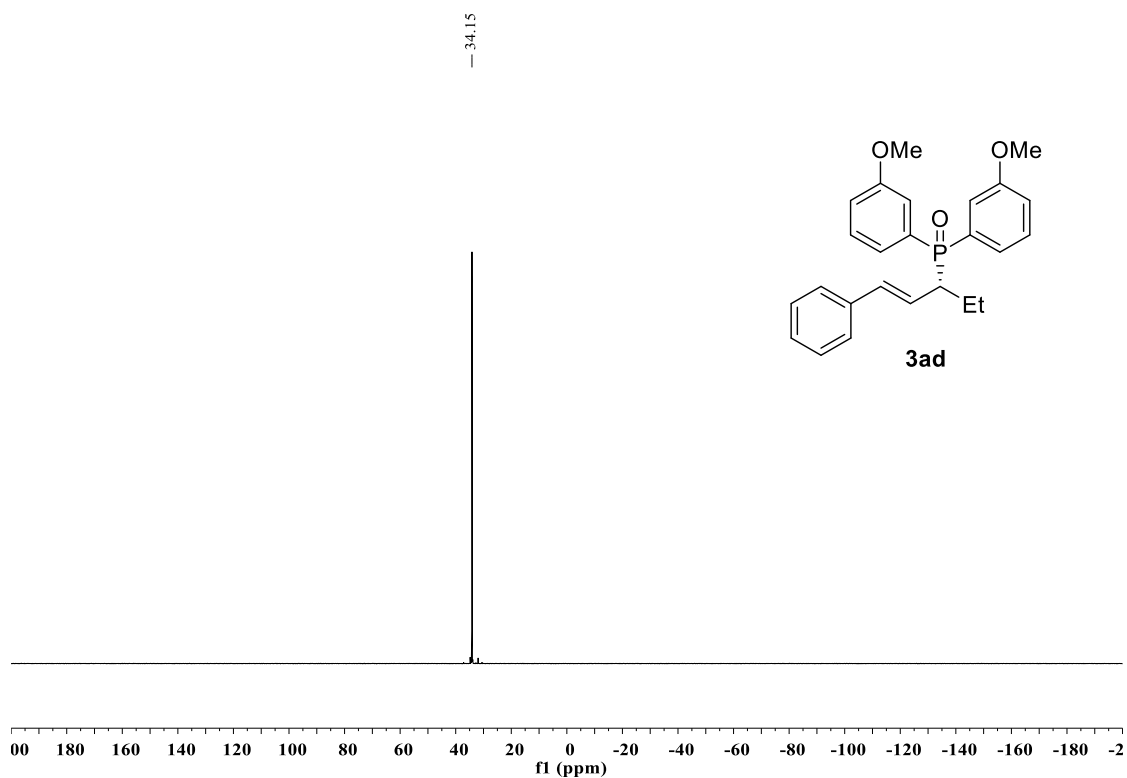

Figure S77.  $^{31}\text{P}$  NMR spectra of **3ad**.

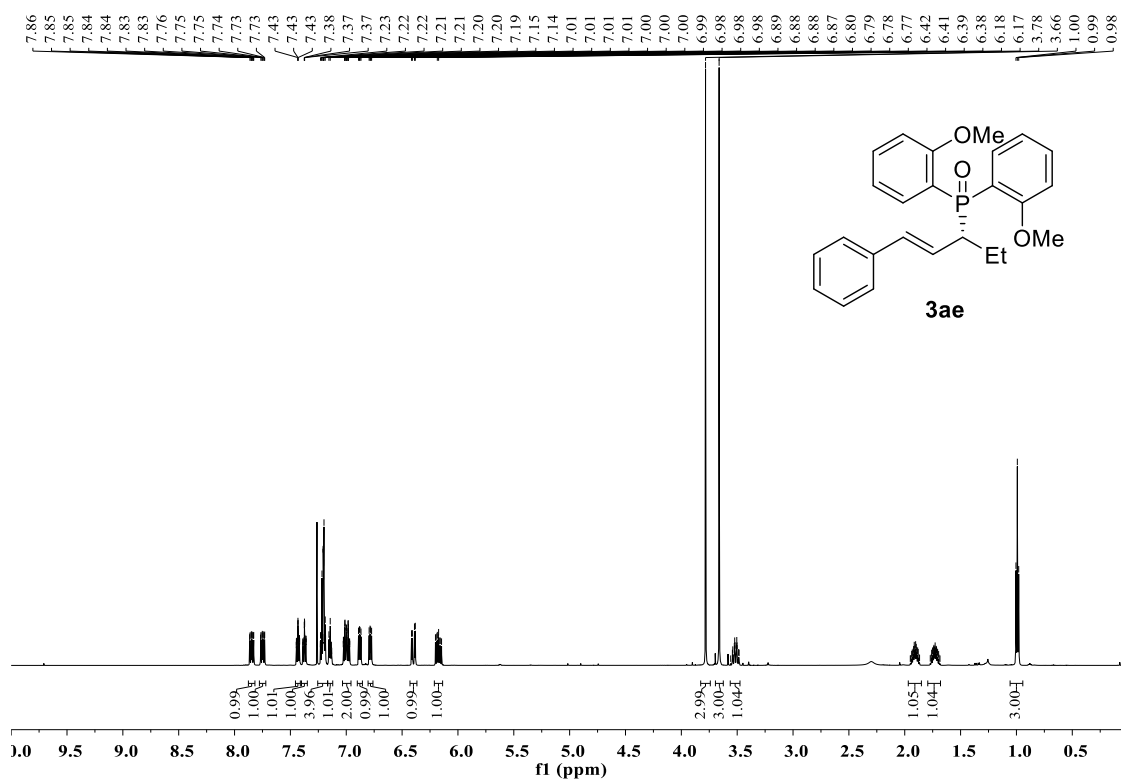

Figure S78.  $^1\text{H}$  NMR spectra of **3ae**.

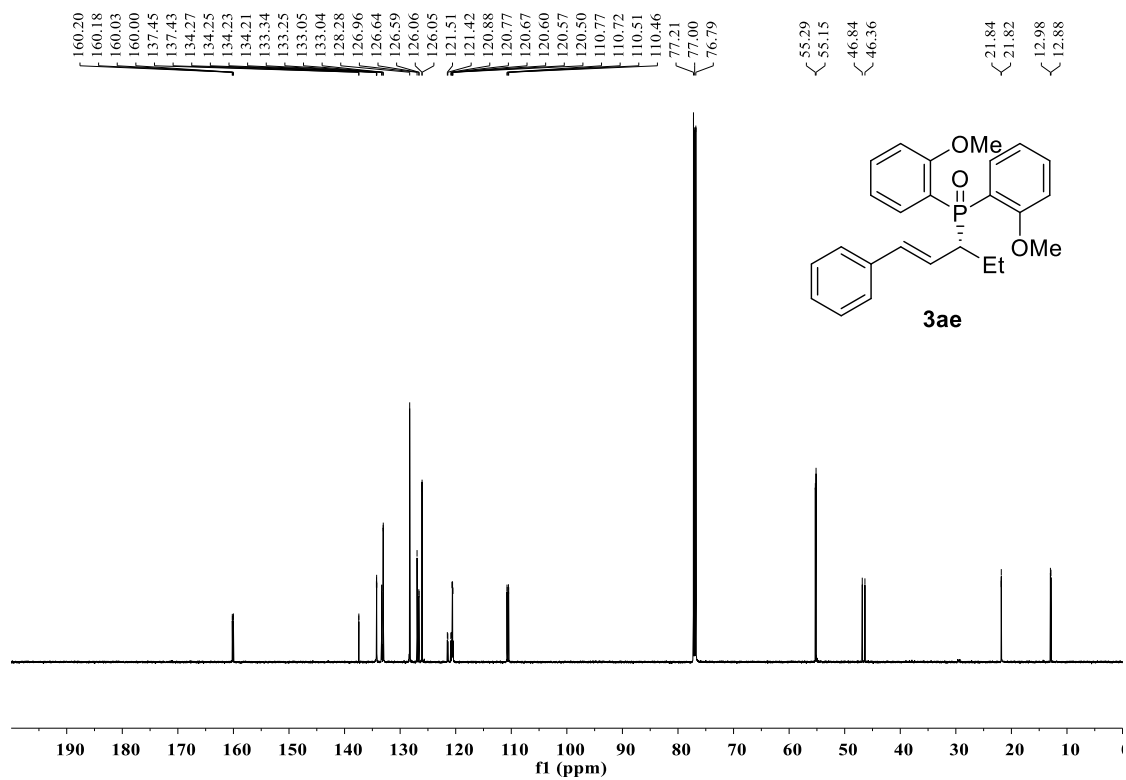

Figure S79. <sup>13</sup>C NMR spectra of **3ae**.

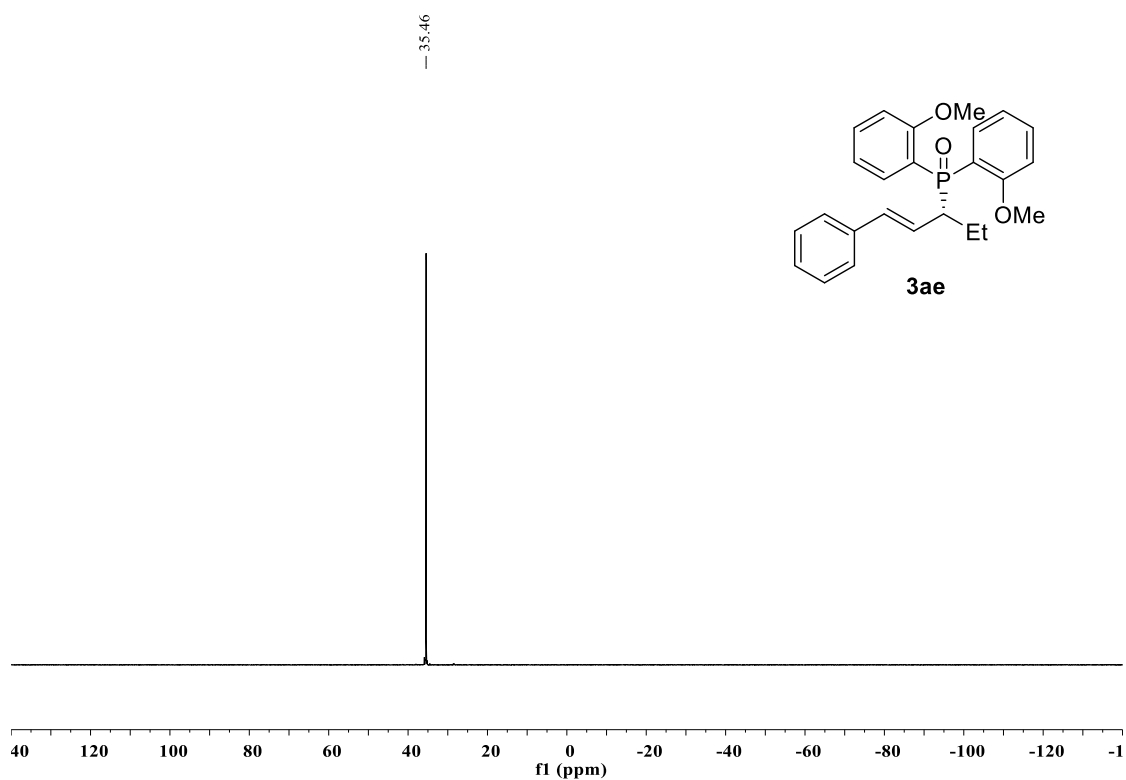

Figure S80. <sup>31</sup>P NMR spectra of **3ae**.

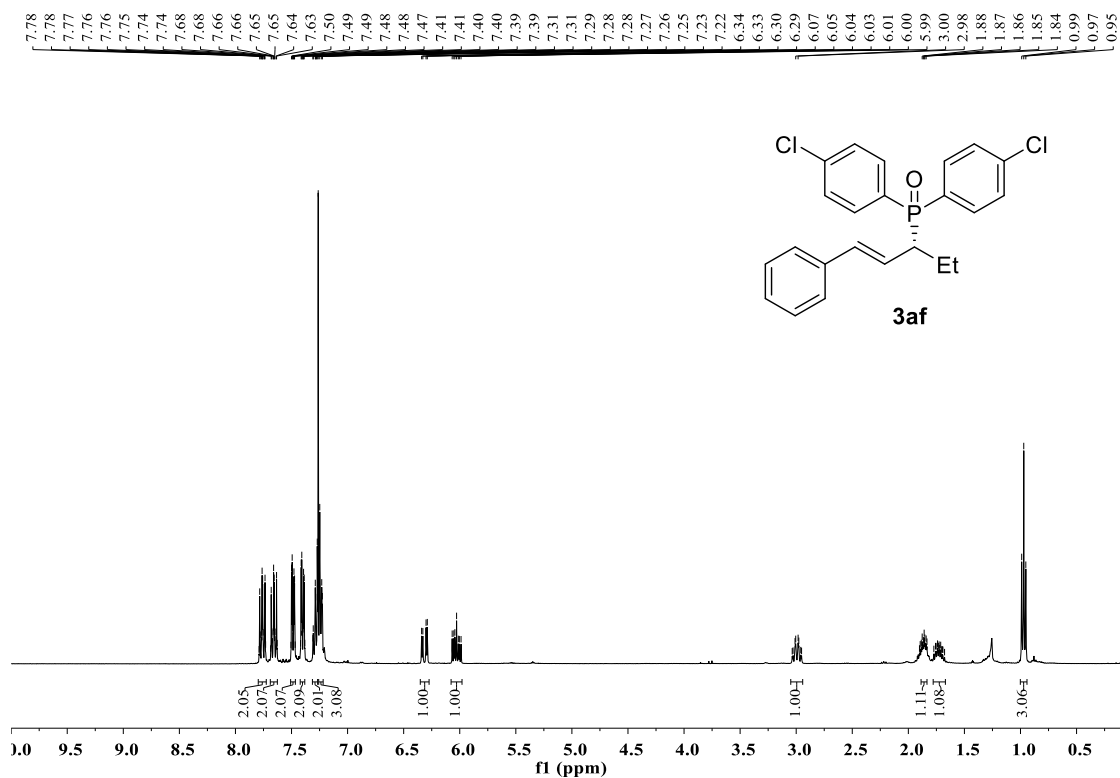

Figure S81. <sup>1</sup>H NMR spectra of 3af.

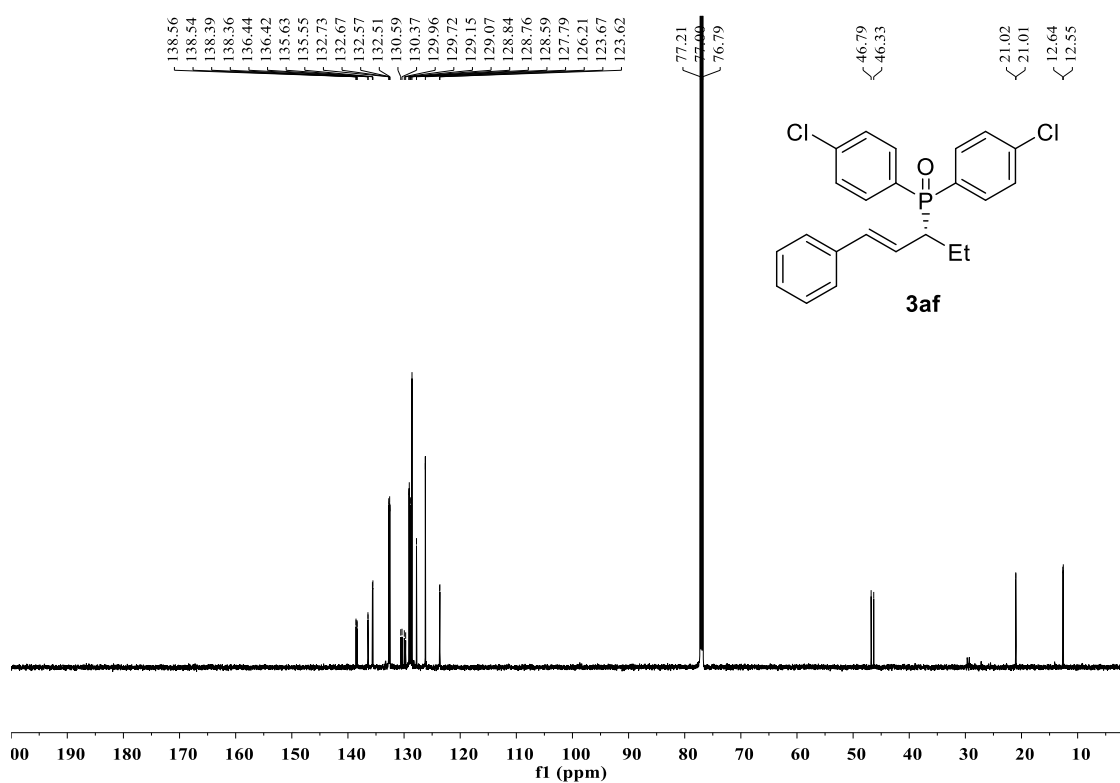

Figure S82. <sup>13</sup>C NMR spectra of 3af.

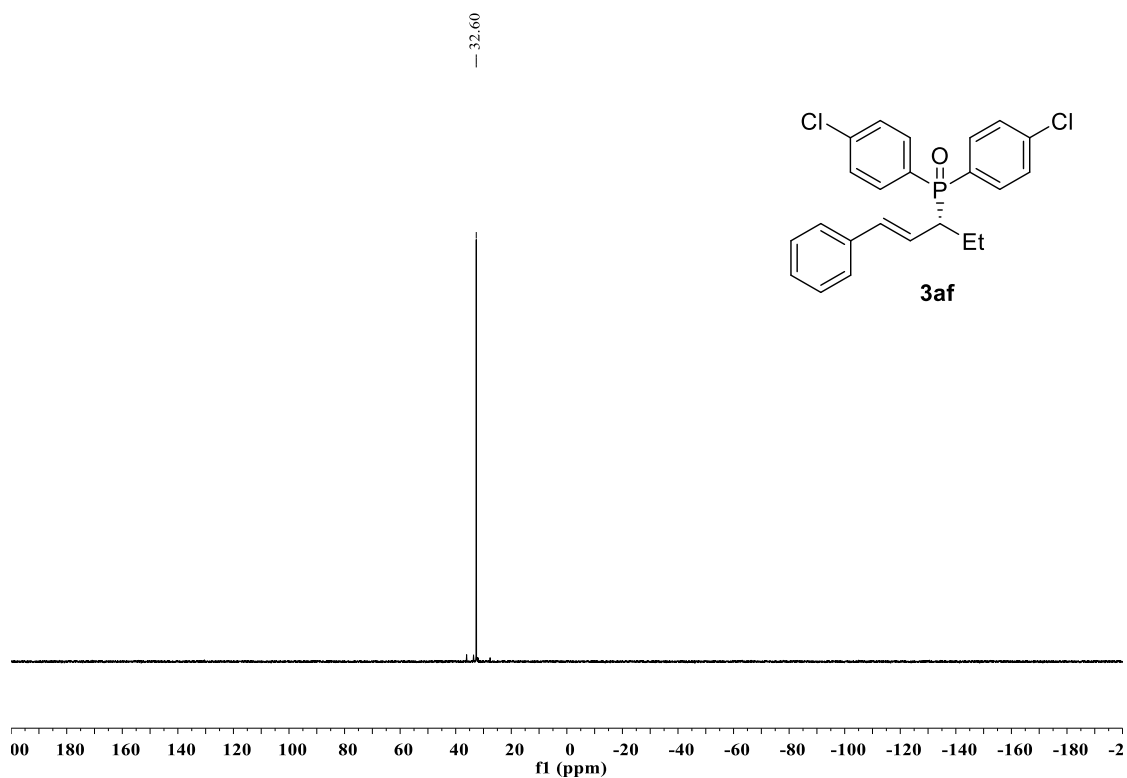

**Figure S83.**  $^{31}\text{P}$  NMR spectra of **3af**.

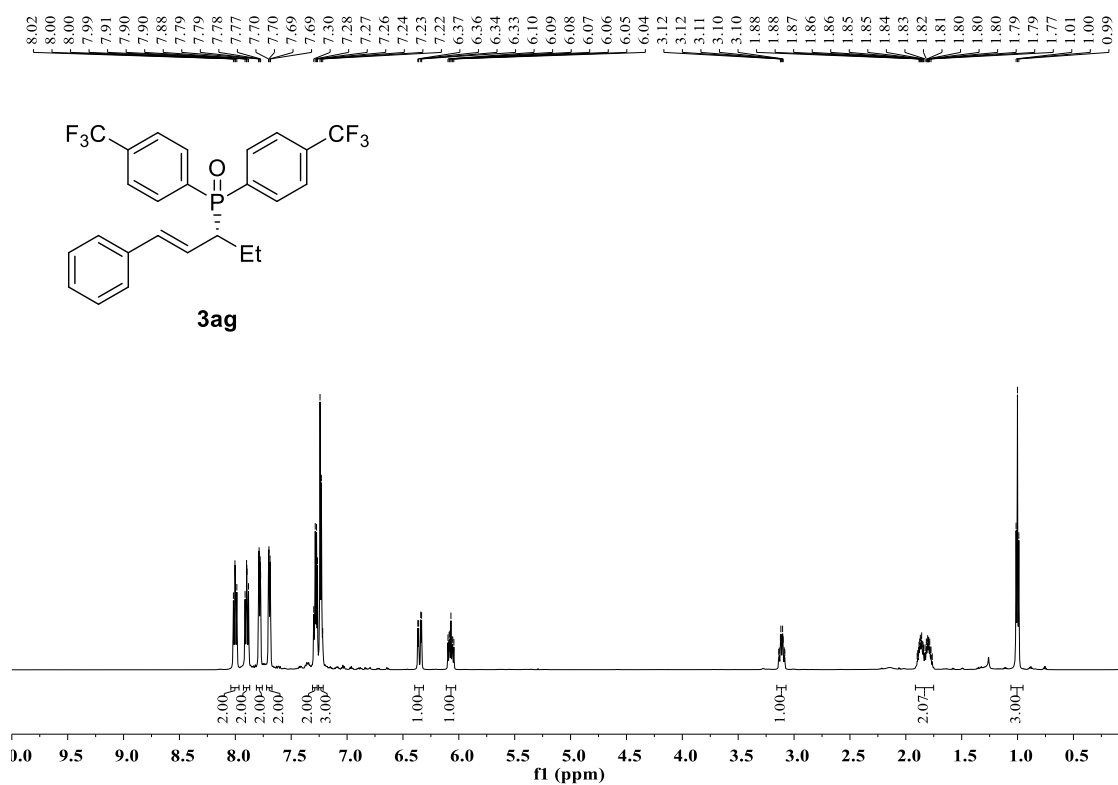

**Figure S84.**  $^1\text{H}$  NMR spectra of **3ag**.

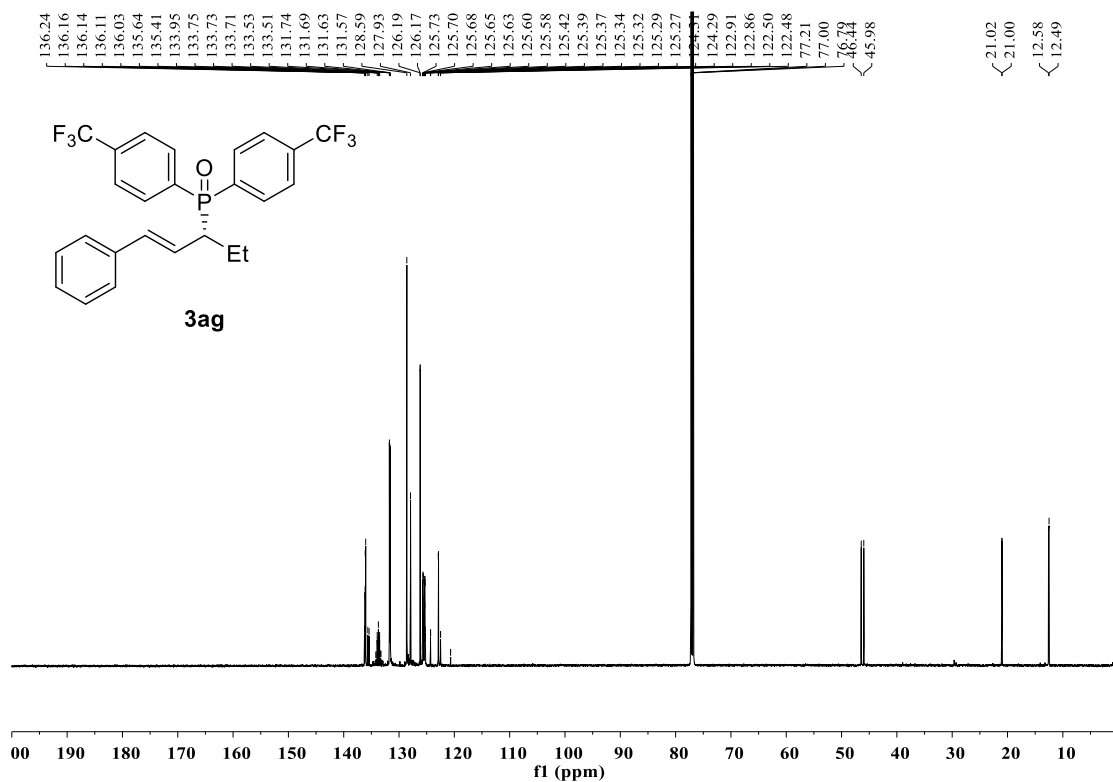

Figure S85.  $^{13}\text{C}$  NMR spectra of **3ag**.

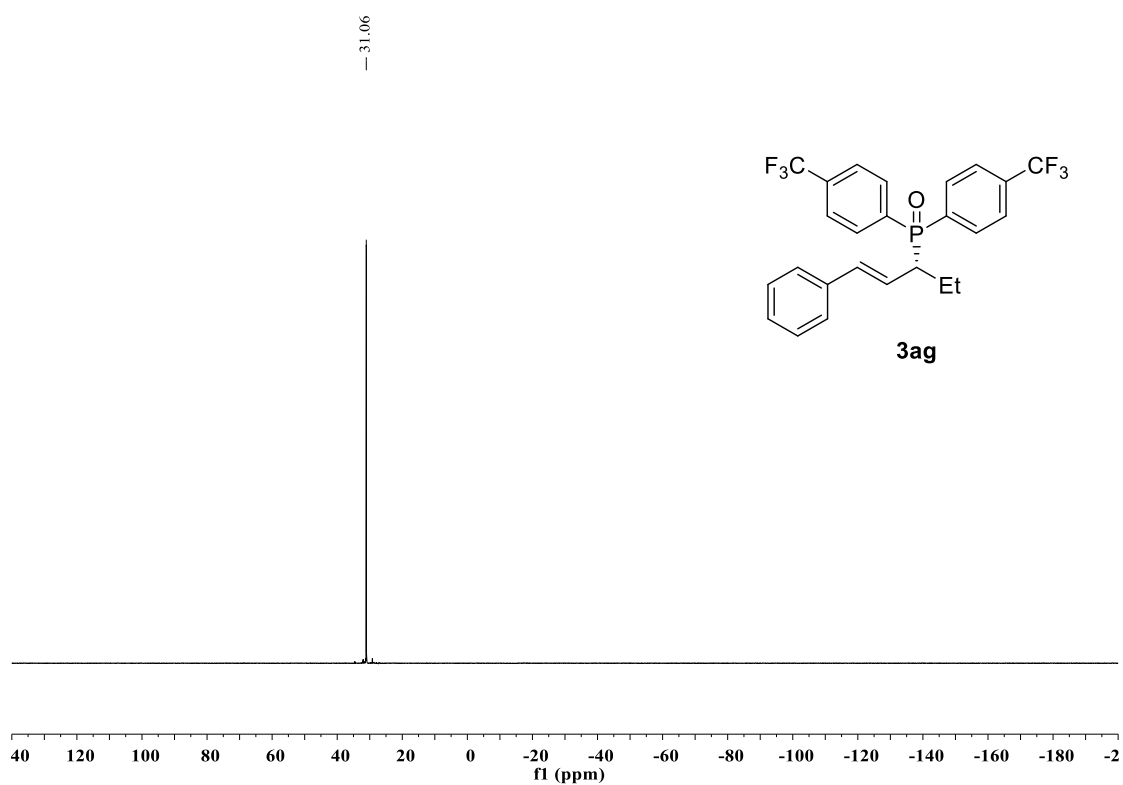

Figure S86.  $^{31}\text{P}$  NMR spectra of **3ag**.



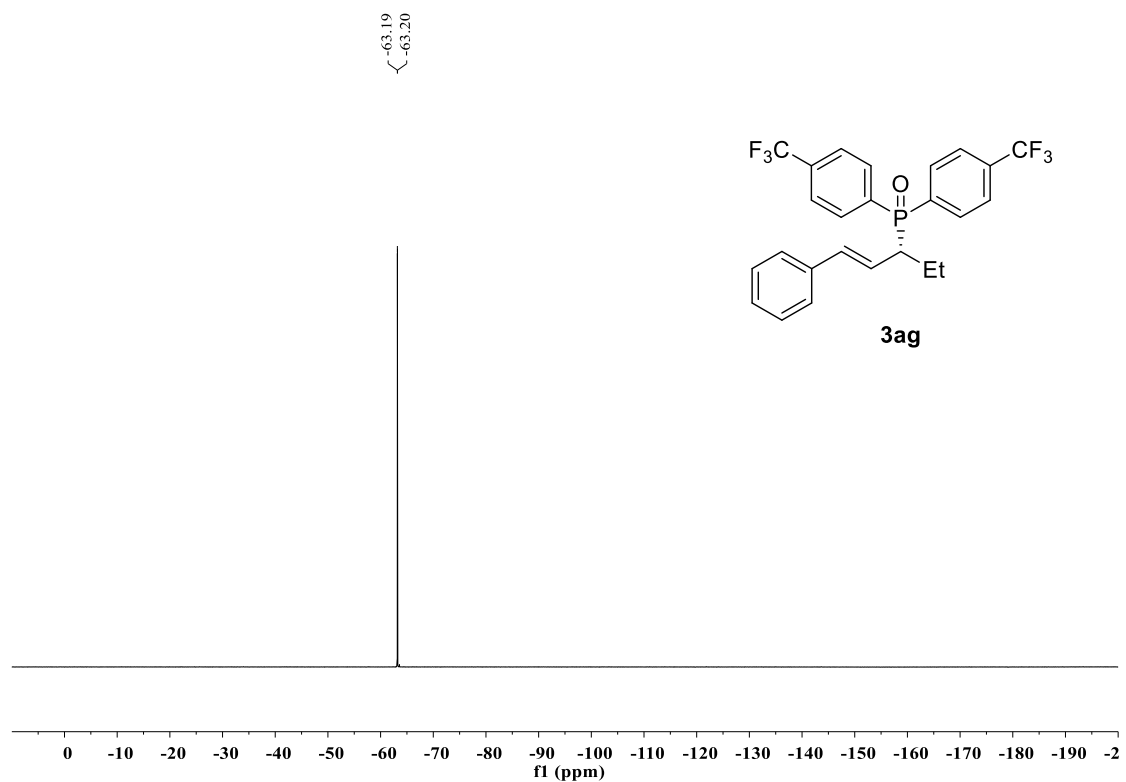

Figure S87.  $^{19}\text{F}$  NMR spectra of **3ag**.

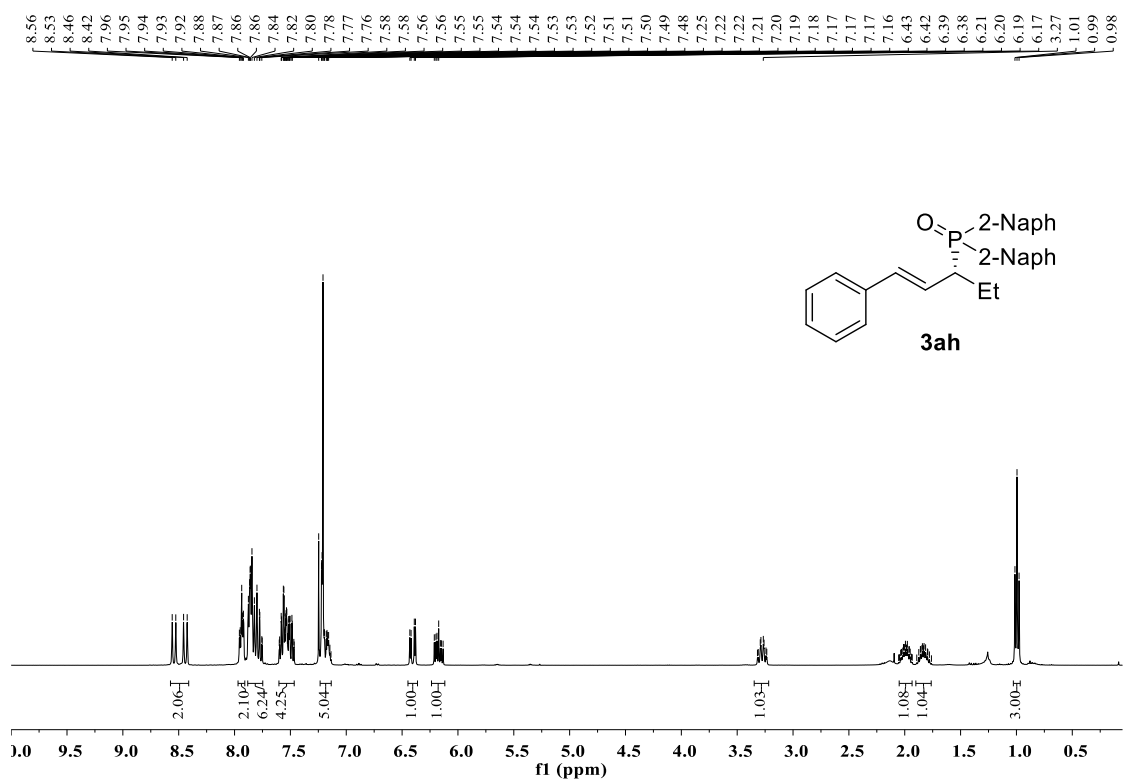

Figure S88.  $^1\text{H}$  NMR spectra of **3ah**.

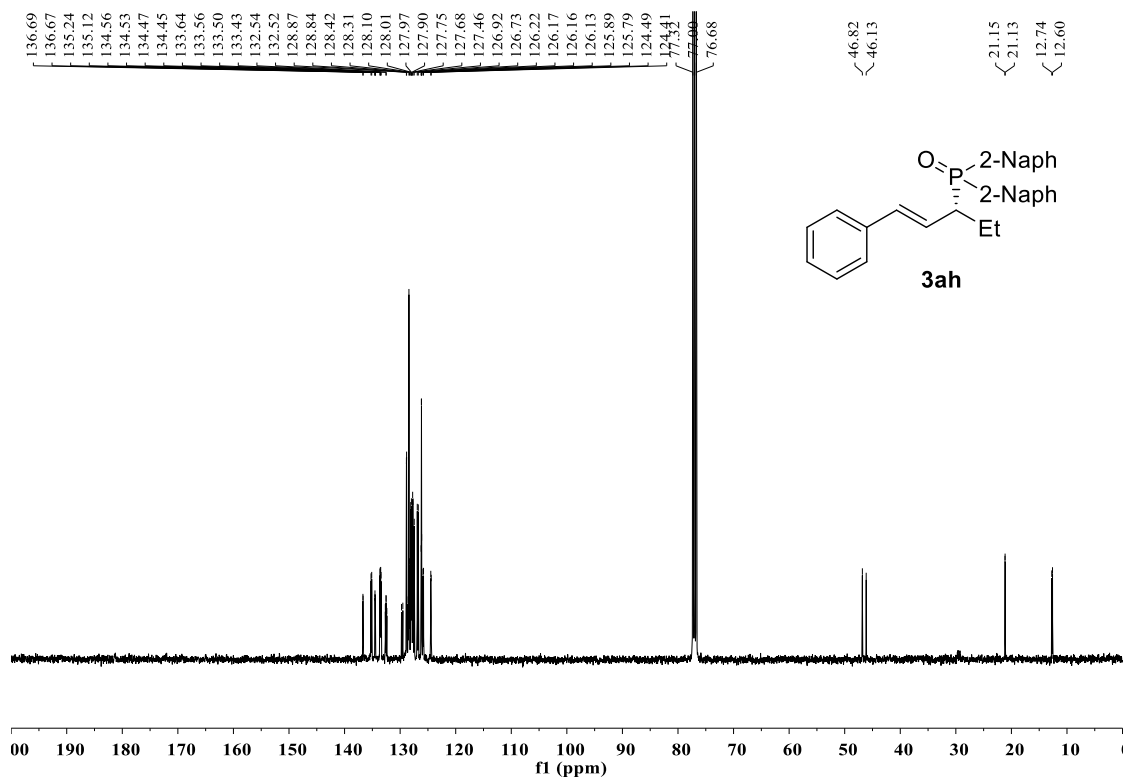

Figure S89. <sup>13</sup>C NMR spectra of **3ah**.

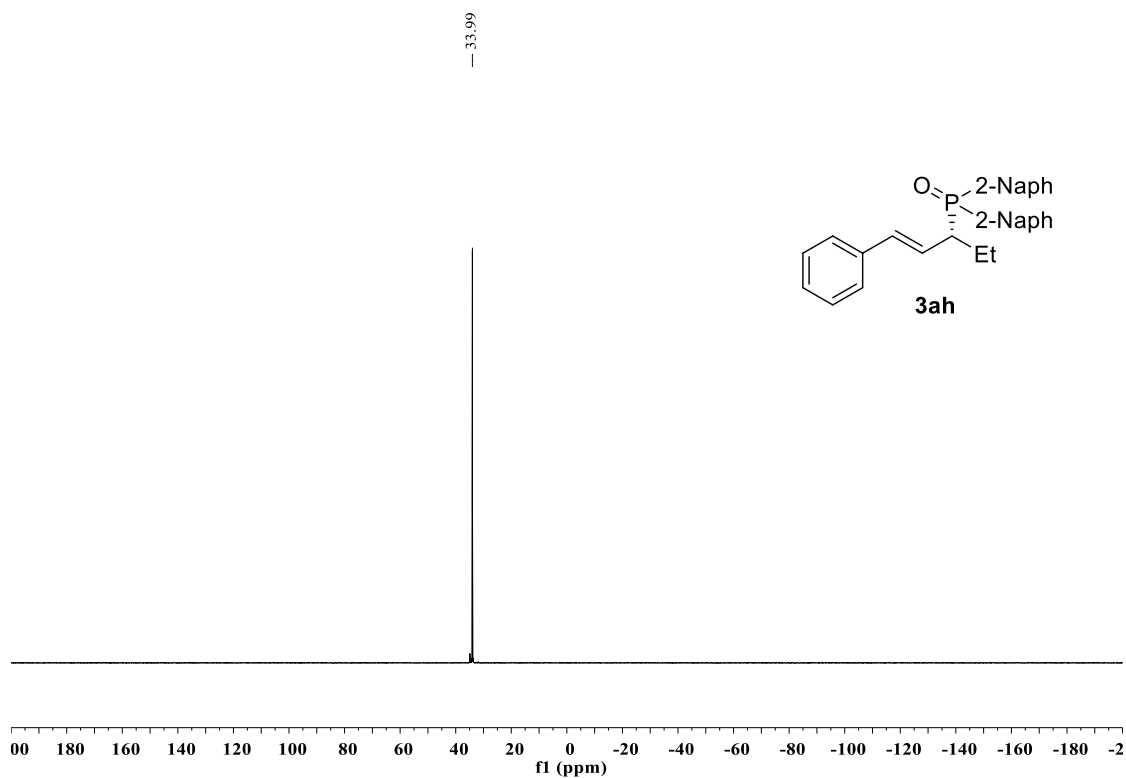

Figure S90. <sup>31</sup>P NMR spectra of **3ah**.

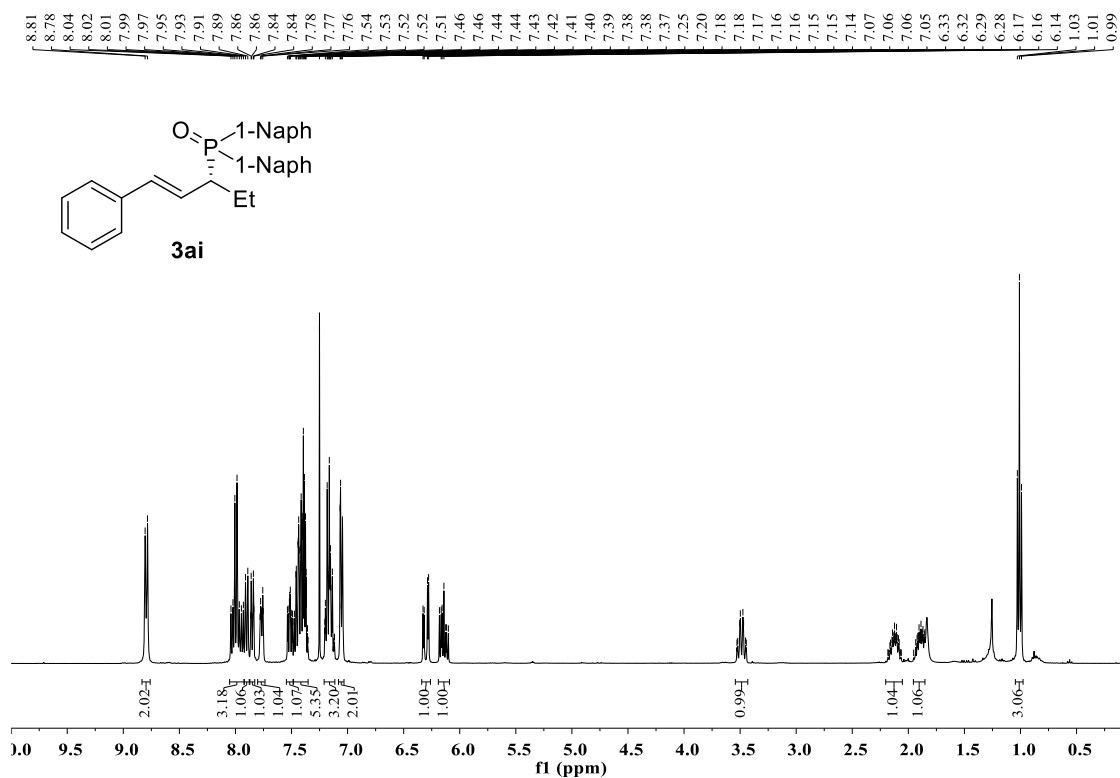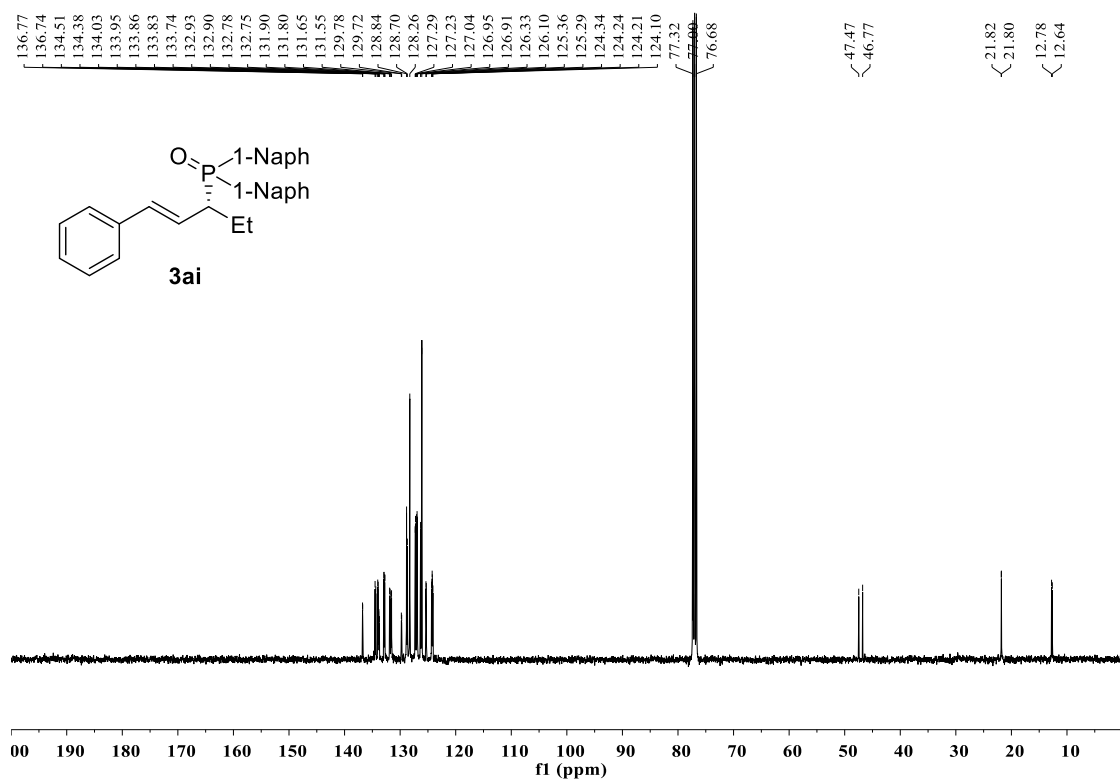

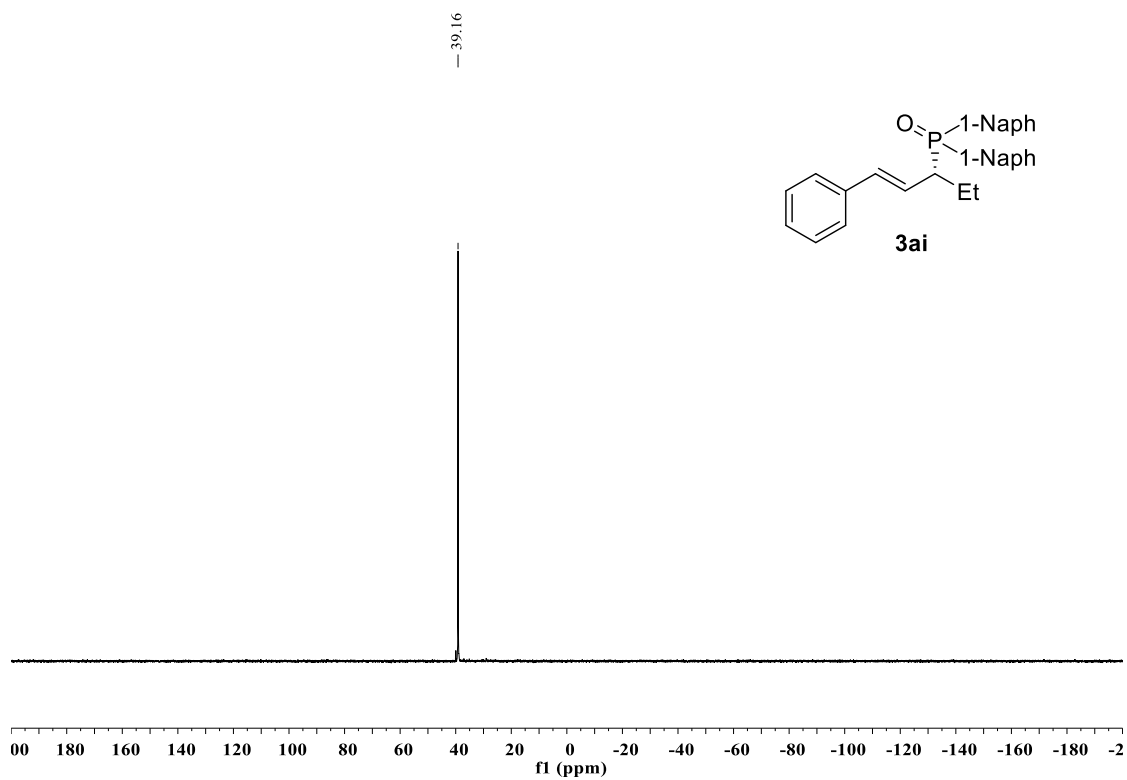

Figure S93. <sup>31</sup>P NMR spectra of **3ai**.

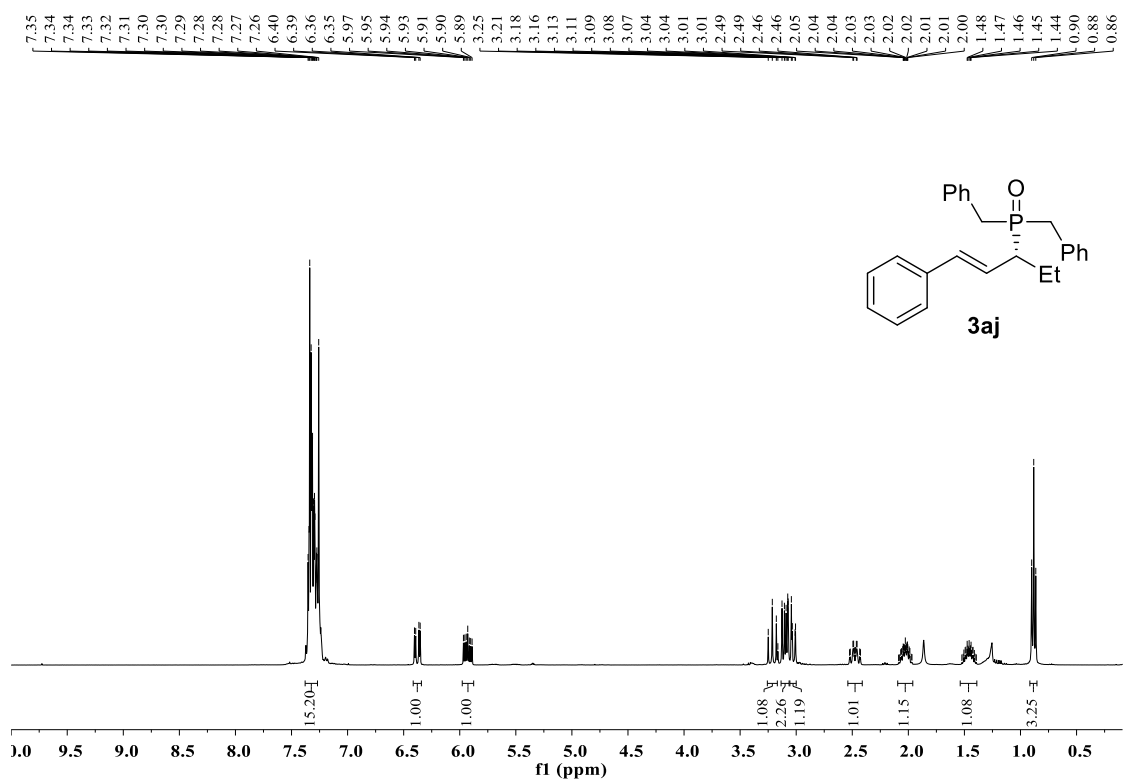

Figure S94. <sup>1</sup>H NMR spectra of **3aj**.

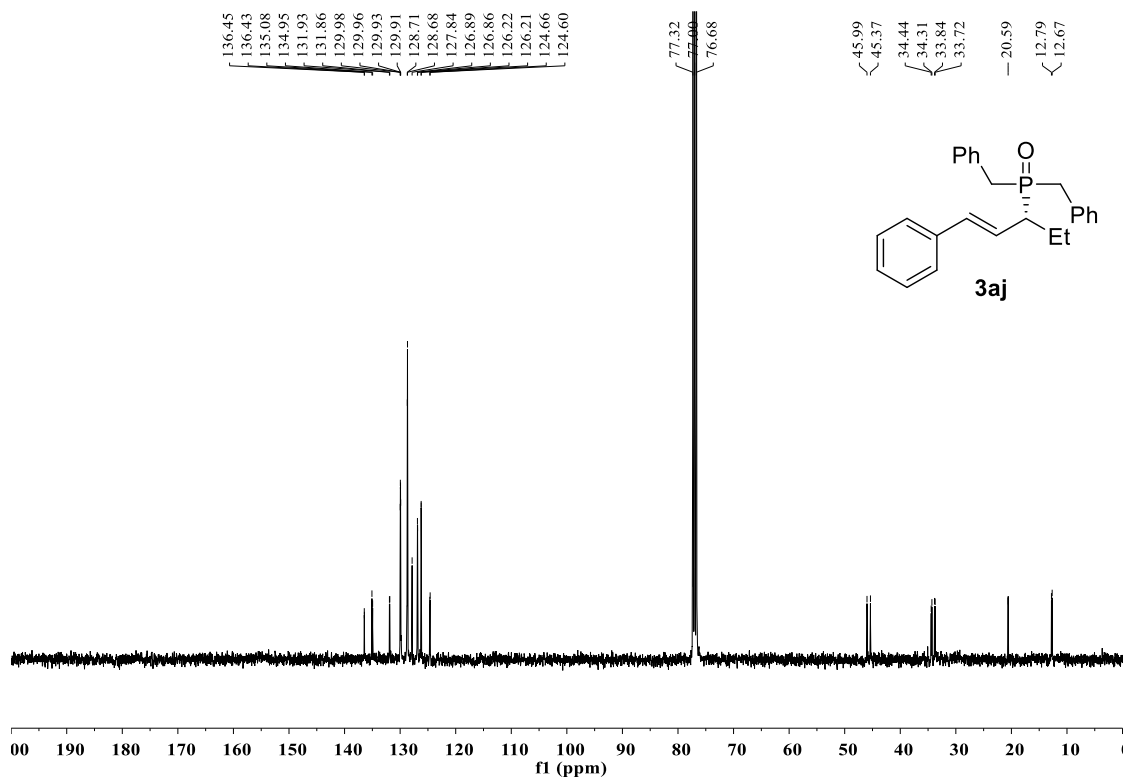

Figure S95.  $^{13}\text{C}$  NMR spectra of **3aj**.

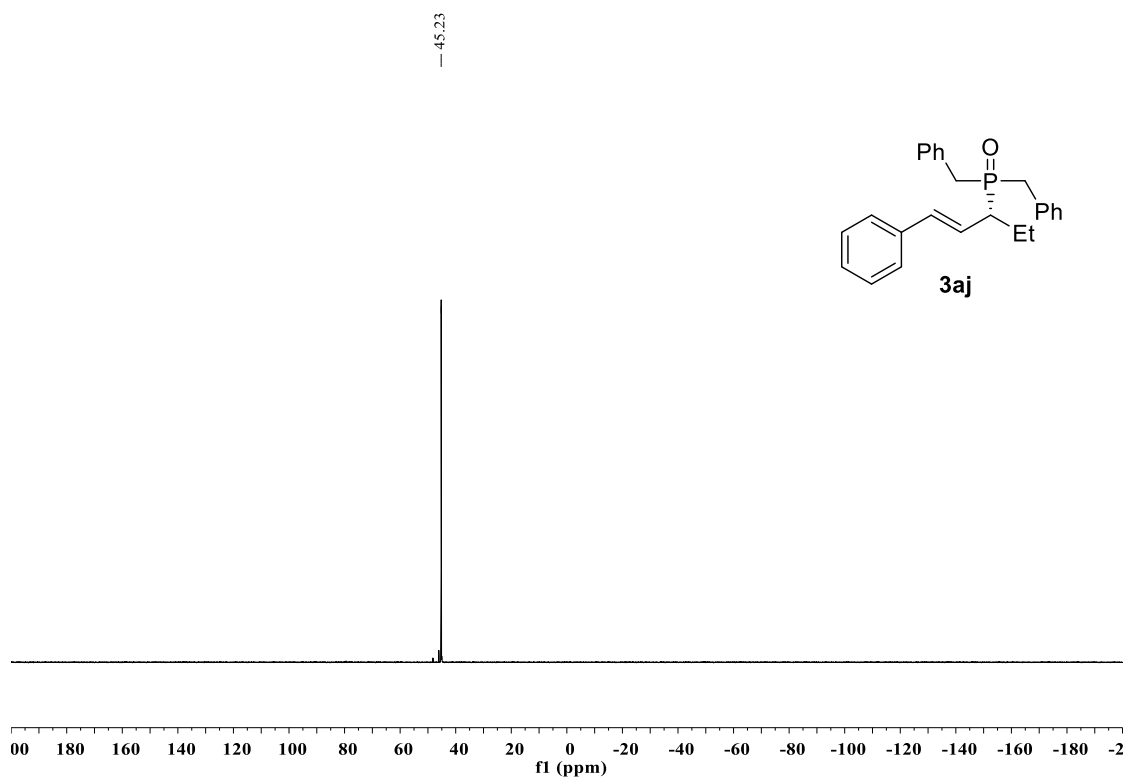

Figure S96.  $^{31}\text{P}$  NMR spectra of **3aj**.

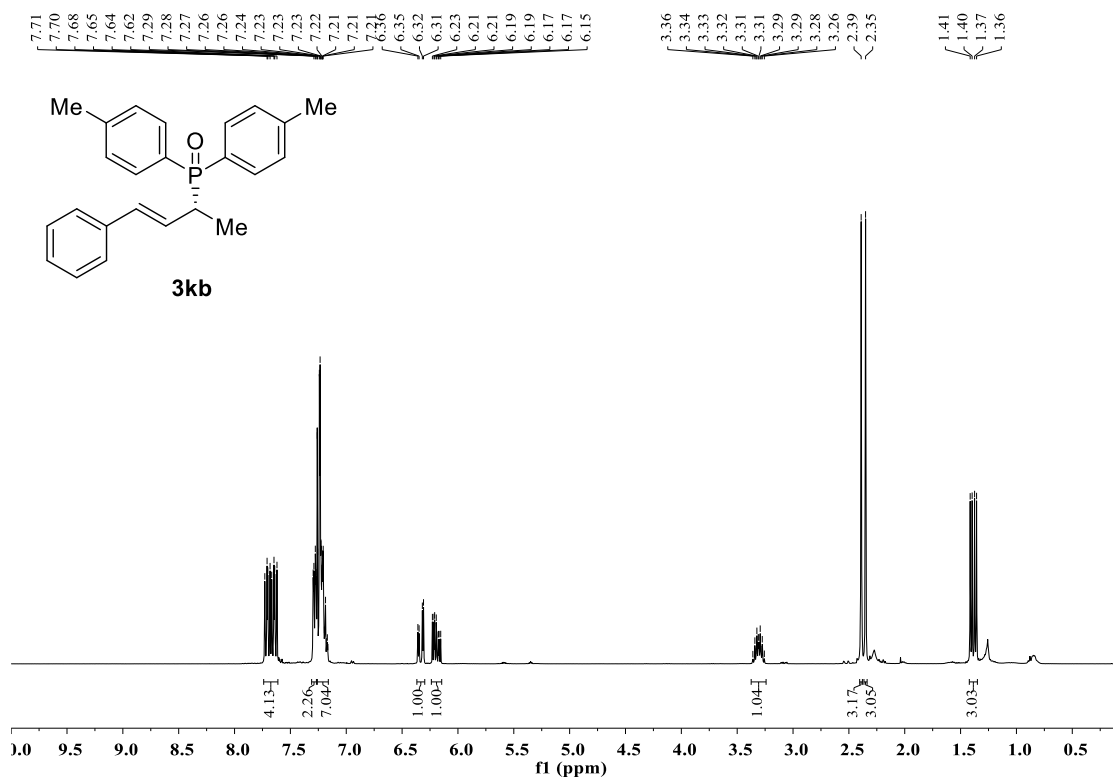

Figure S97. <sup>1</sup>H NMR spectra of **3kb**.

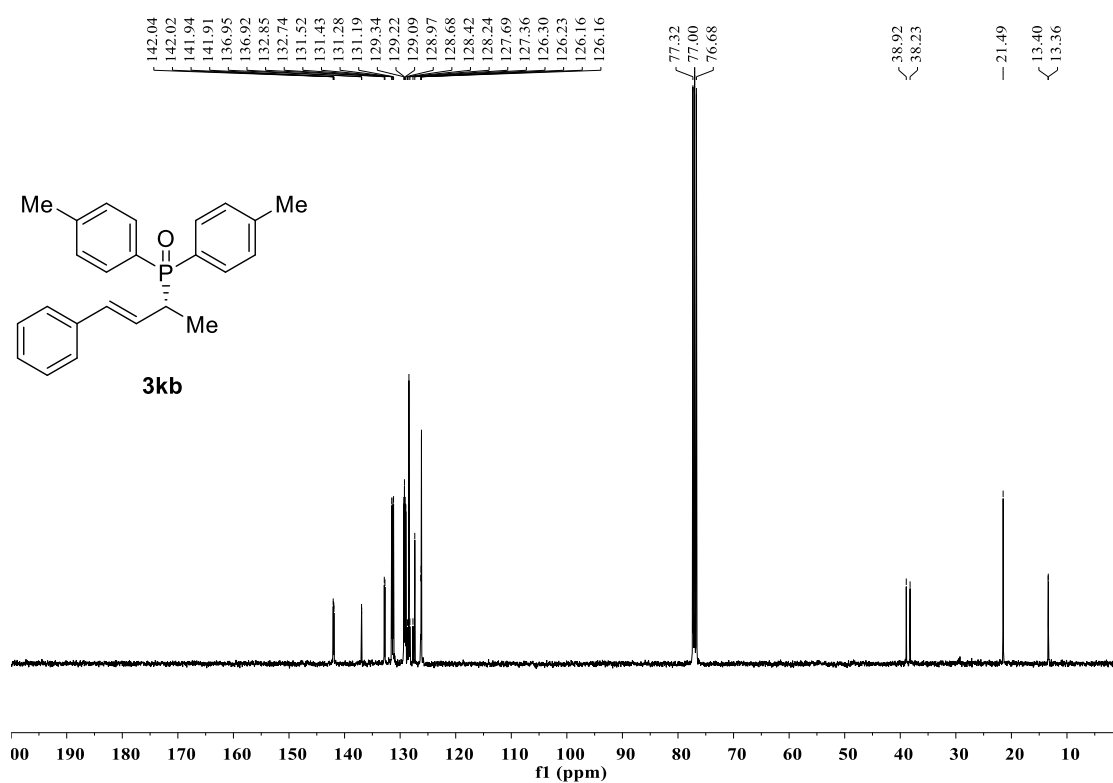

Figure S98. <sup>13</sup>C NMR spectra of **3kb**.

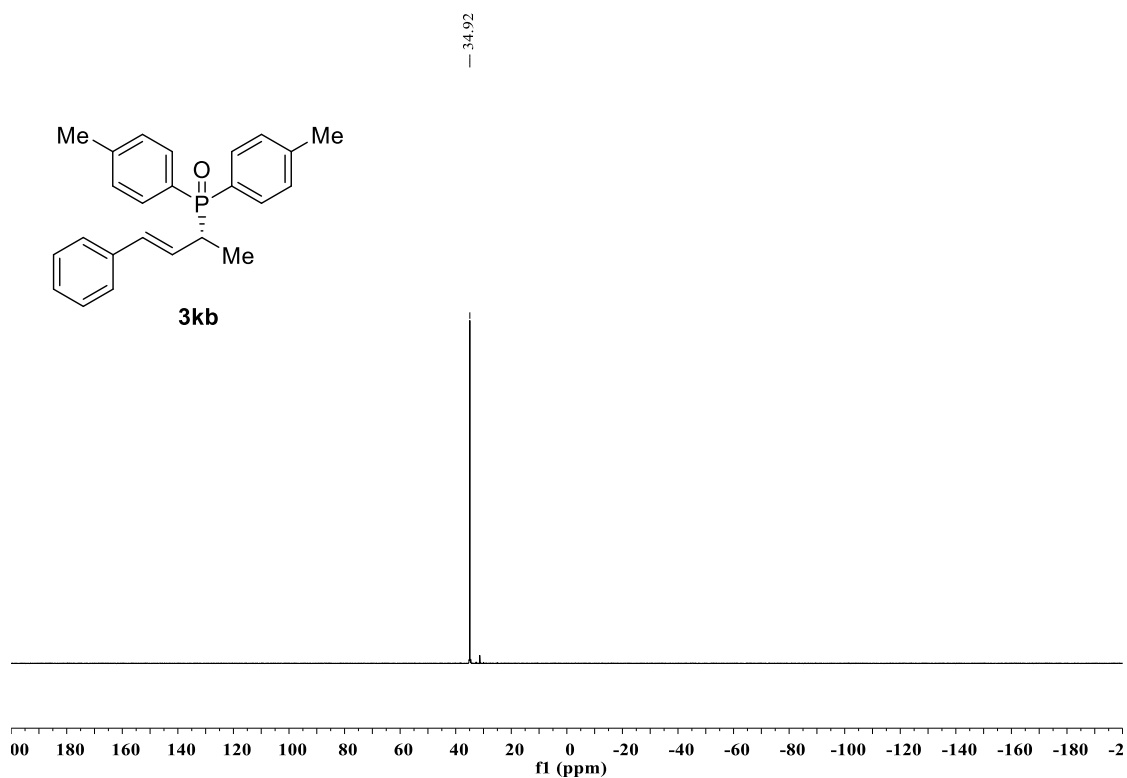

Figure S99. <sup>31</sup>P NMR spectra of **3kb**.

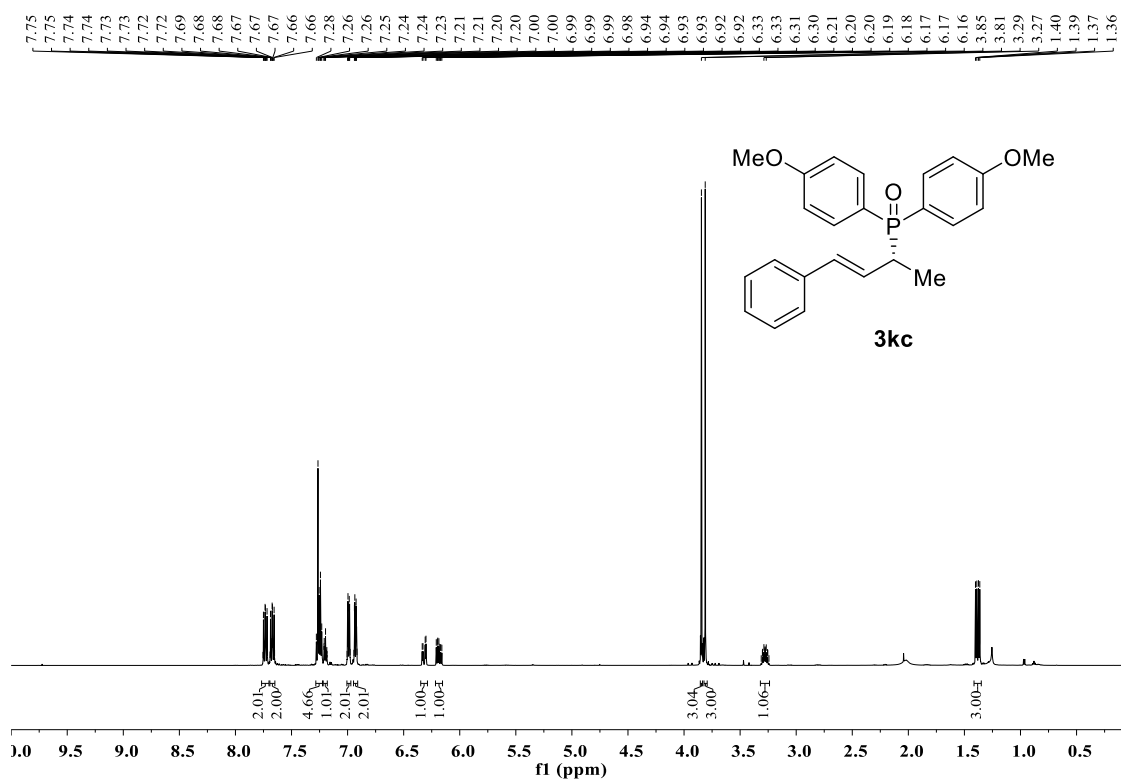

Figure S100. <sup>1</sup>H NMR spectra of **3kc**.

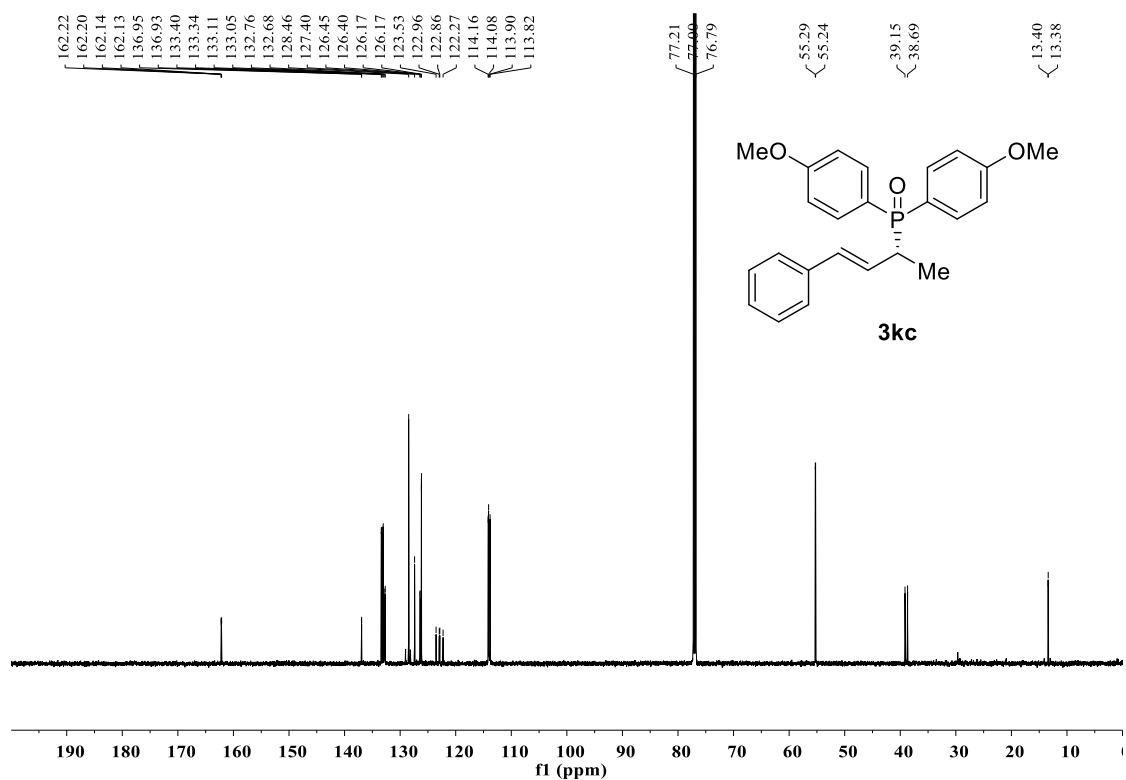

Figure S101. <sup>13</sup>C NMR spectra of **3kc**.

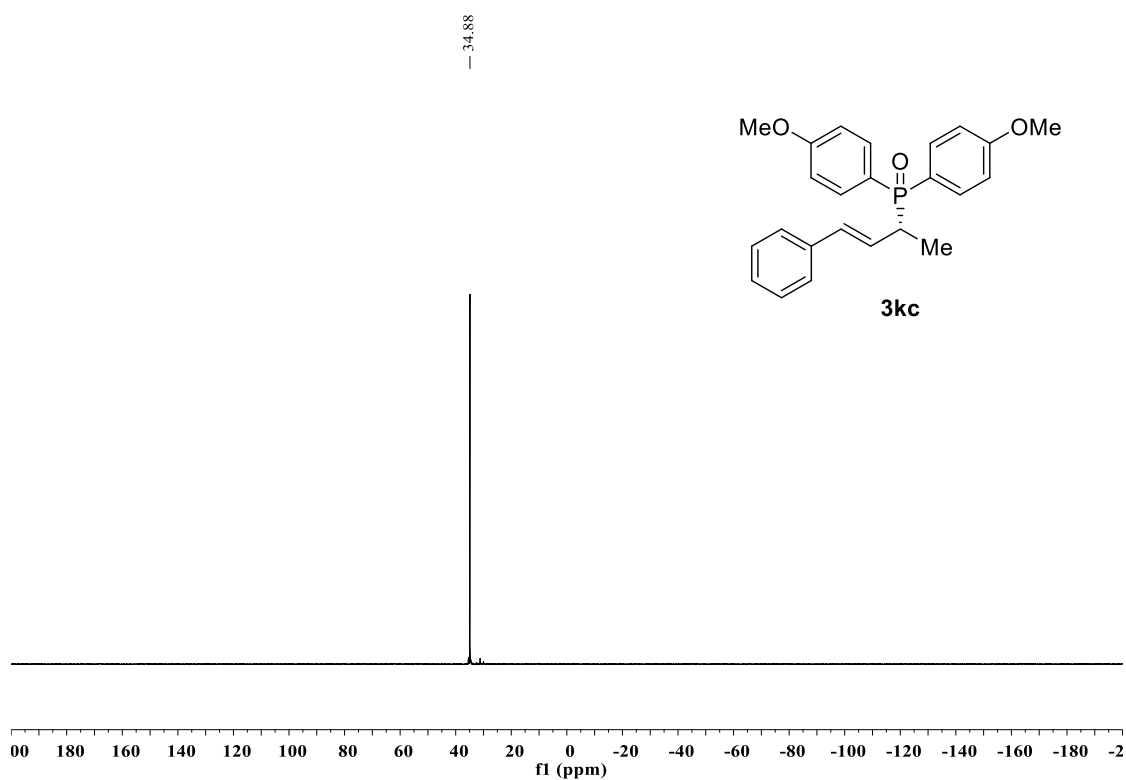

Figure S102. <sup>31</sup>P NMR spectra of **3kc**.



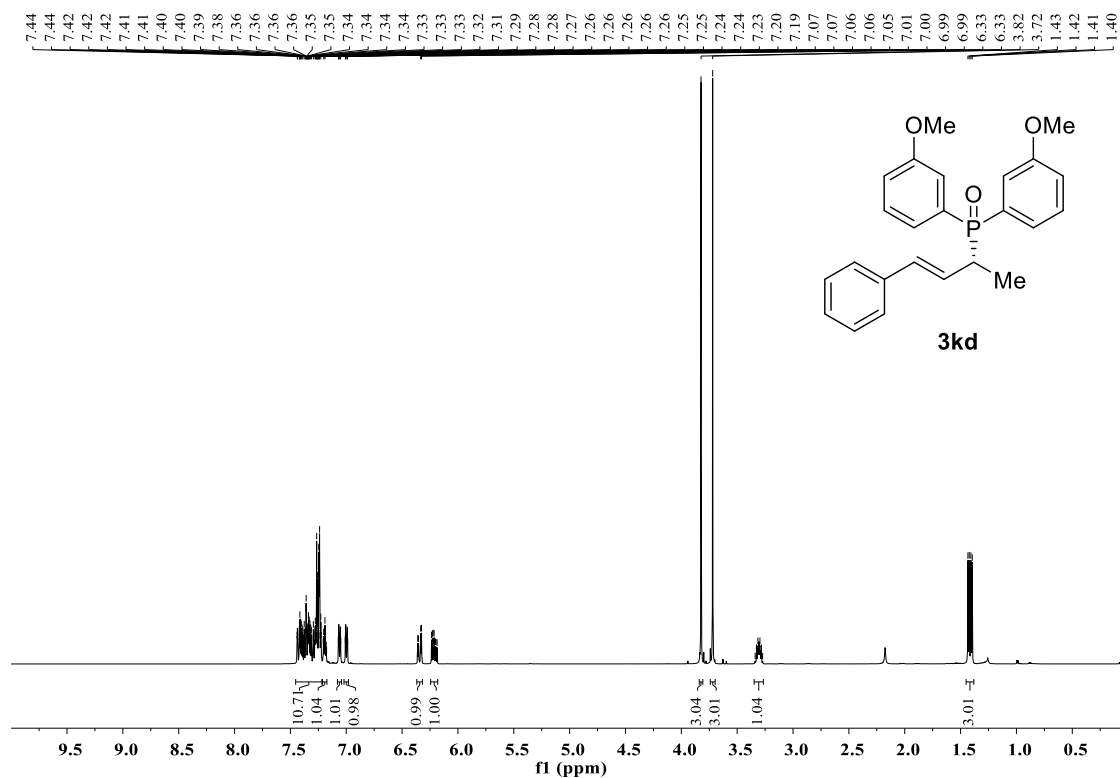

Figure S103.  $^1\text{H}$  NMR spectra of **3kd**.

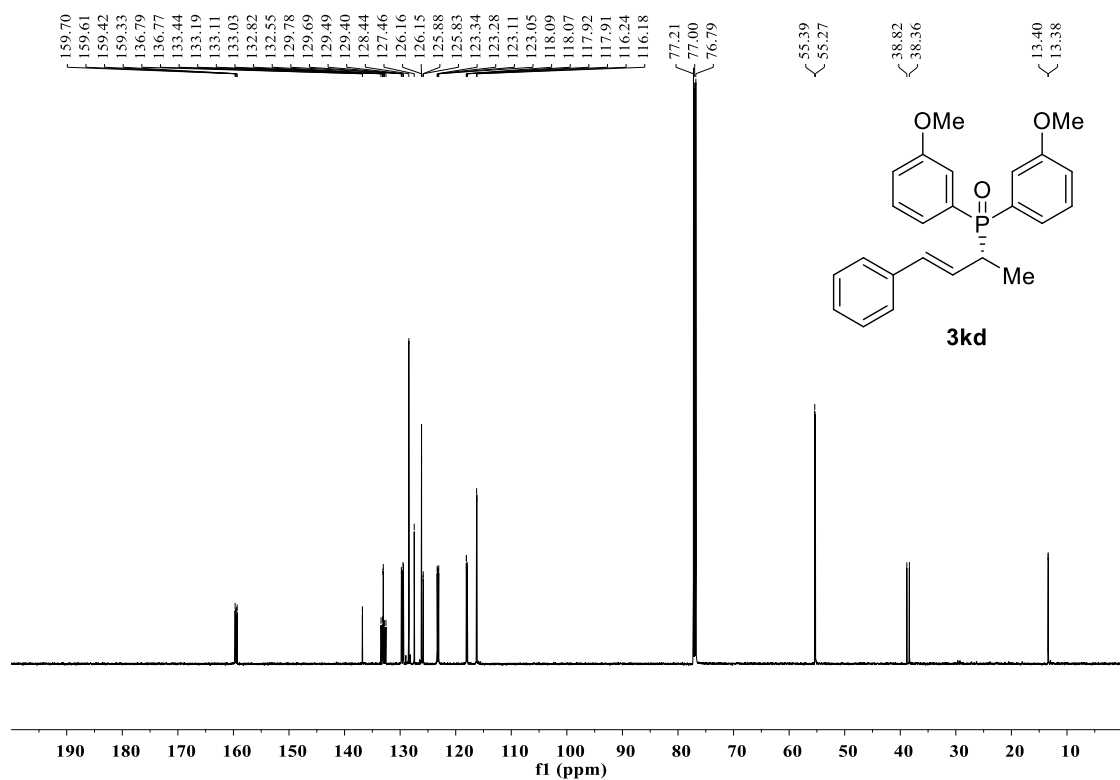

Figure S104.  $^{13}\text{C}$  NMR spectra of **3kd**.

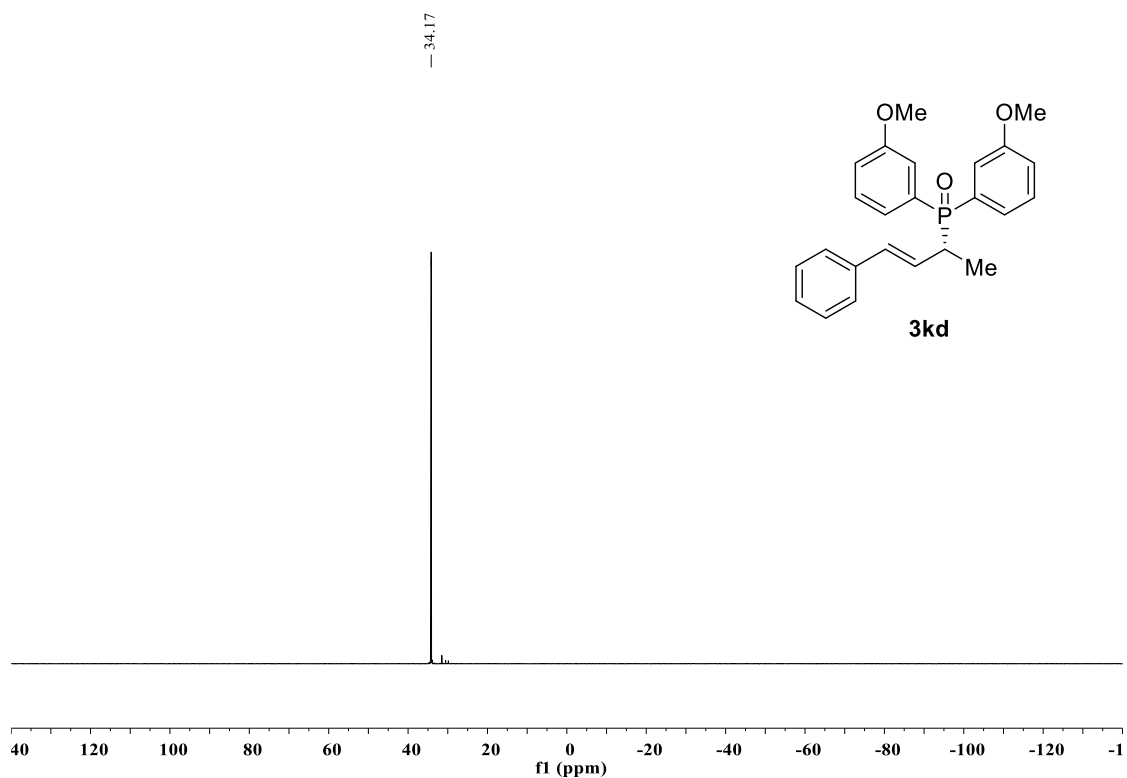

Figure S105.  $^{31}\text{P}$  NMR spectra of **3kd**.

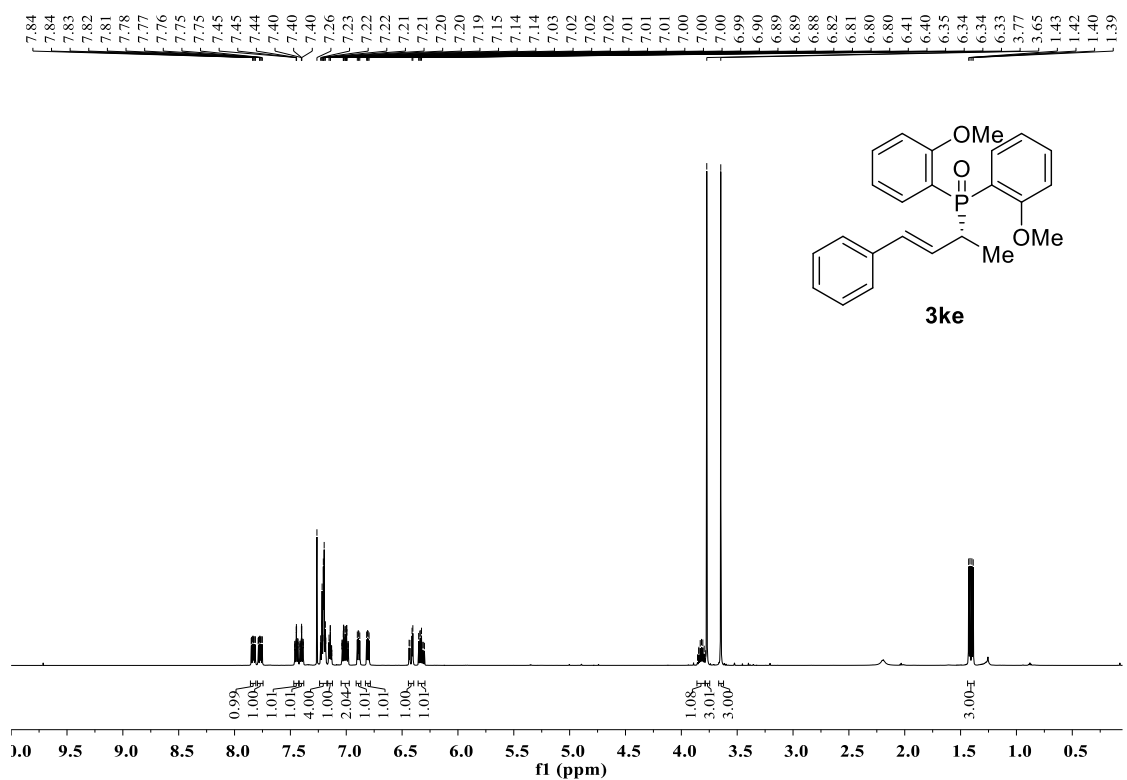

Figure S106.  $^1\text{H}$  NMR spectra of **3ke**.

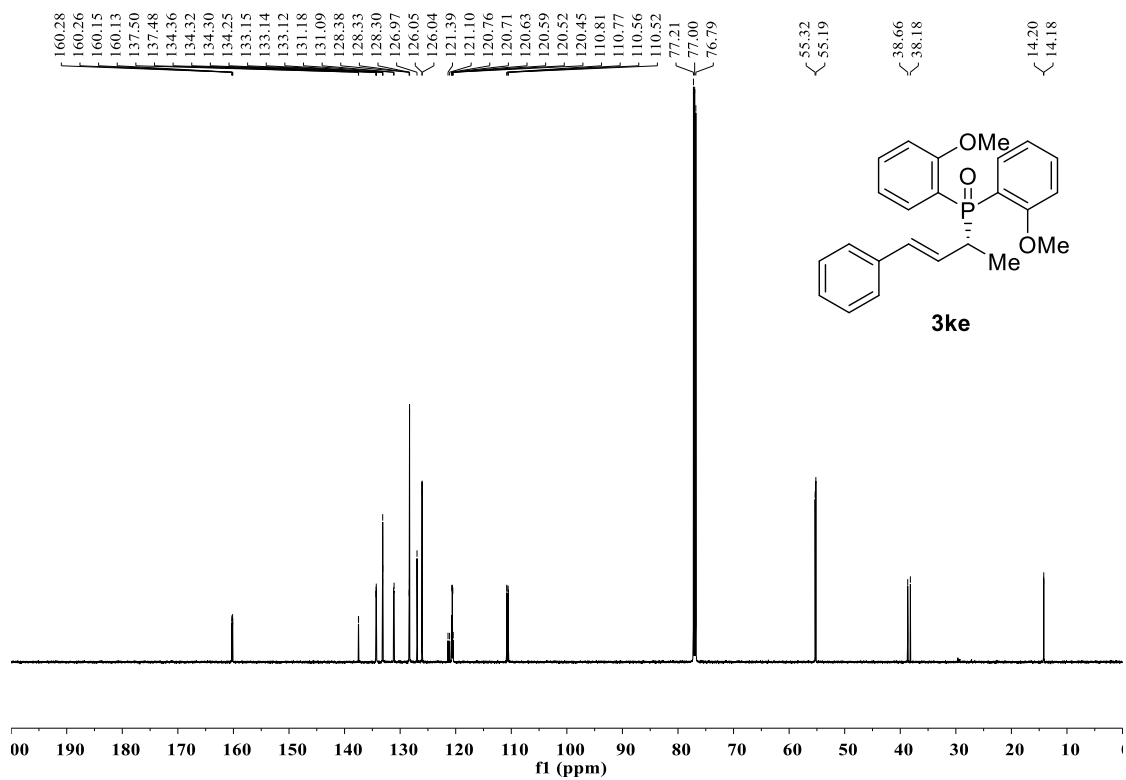

Figure S107. <sup>13</sup>C NMR spectra of **3ke**.

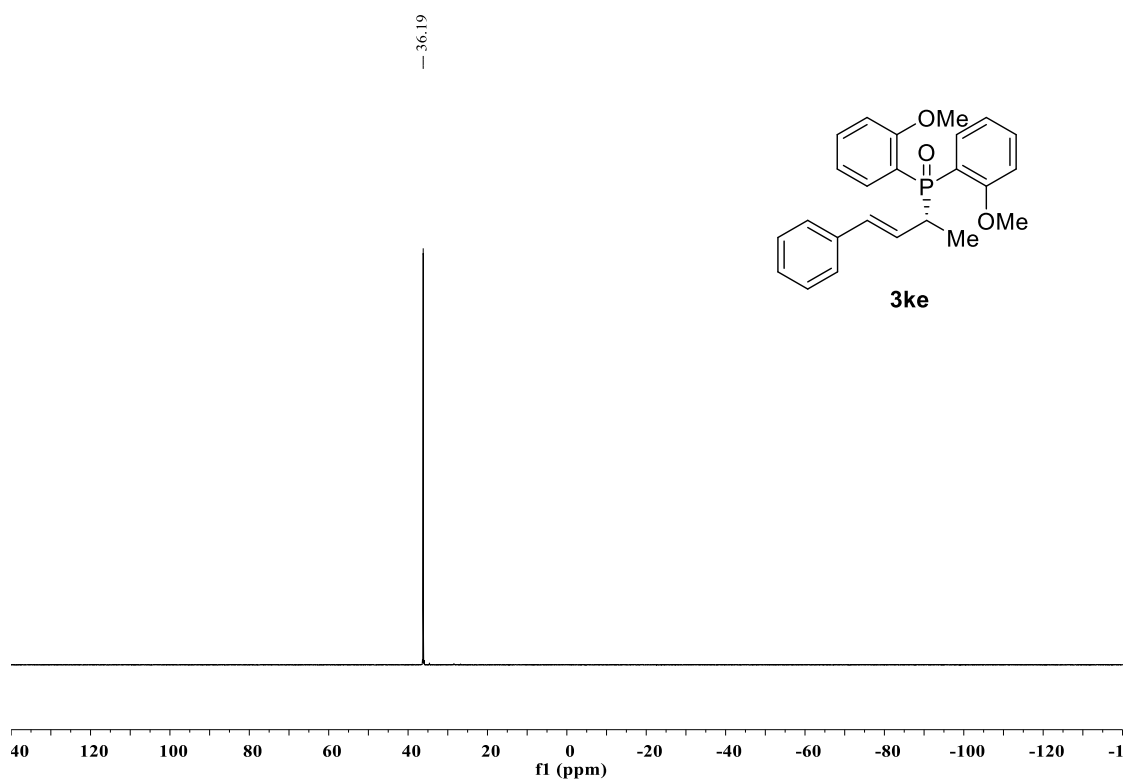

Figure S108. <sup>31</sup>P NMR spectra of **3ke**.

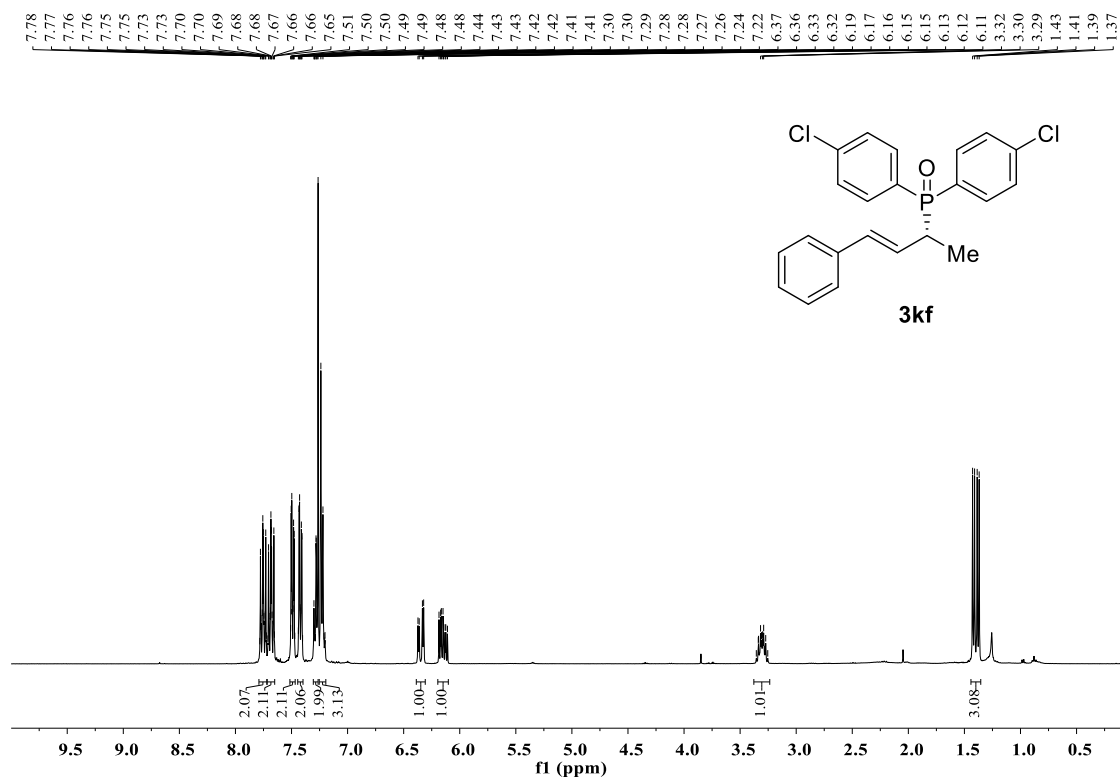

Figure S109. <sup>1</sup>H NMR spectra of **3kf**.

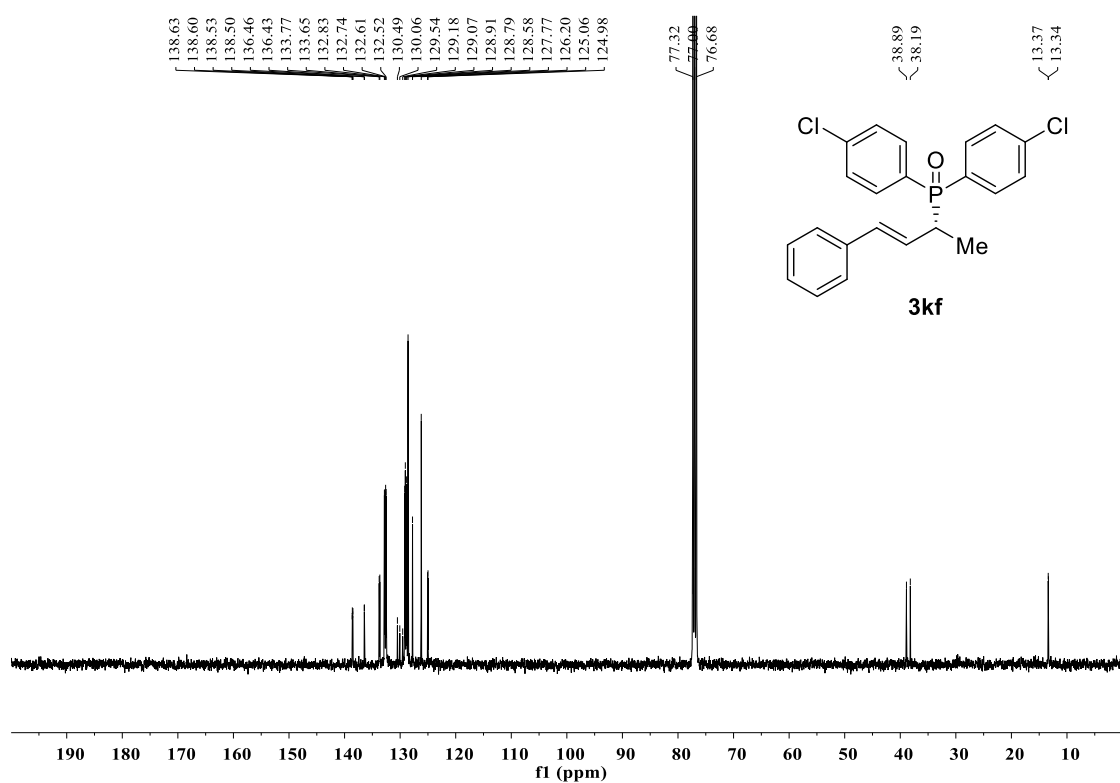

Figure S110. <sup>13</sup>C NMR spectra of **3kf**.

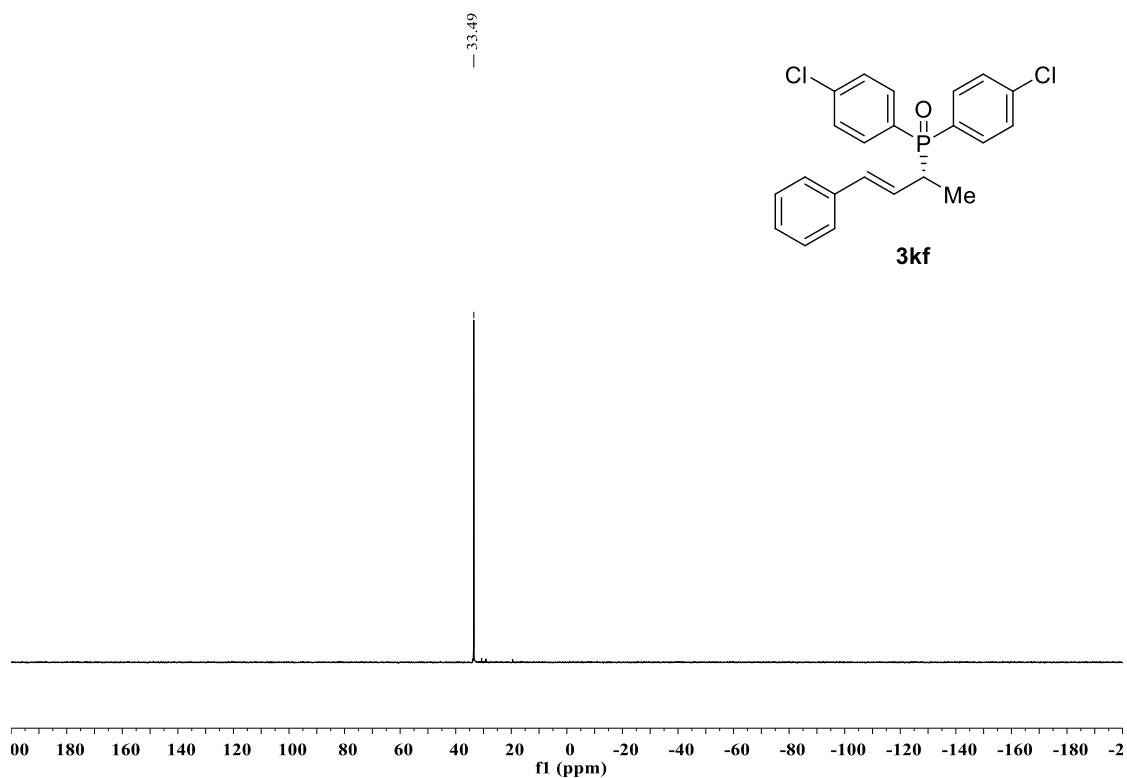

Figure S111.  $^{31}\text{P}$  NMR spectra of **3kf**.

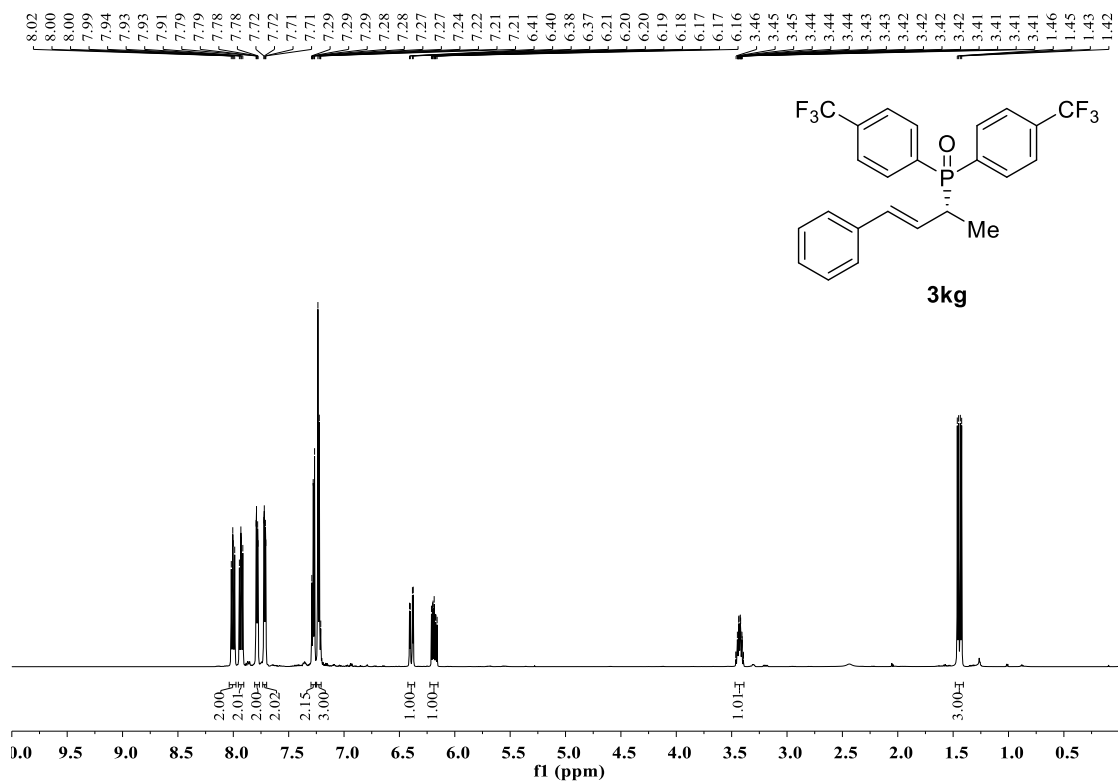

Figure S112.  $^1\text{H}$  NMR spectra of **3kg**.

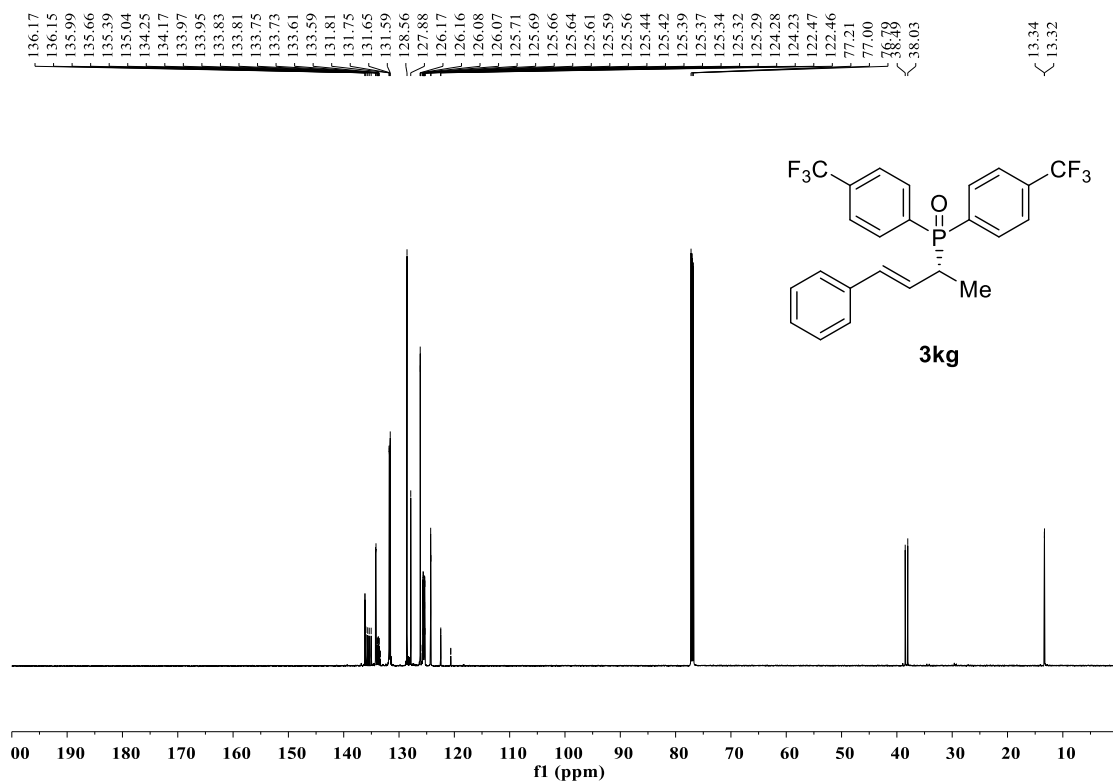

Figure S113.  $^{13}\text{C}$  NMR spectra of **3kg**.

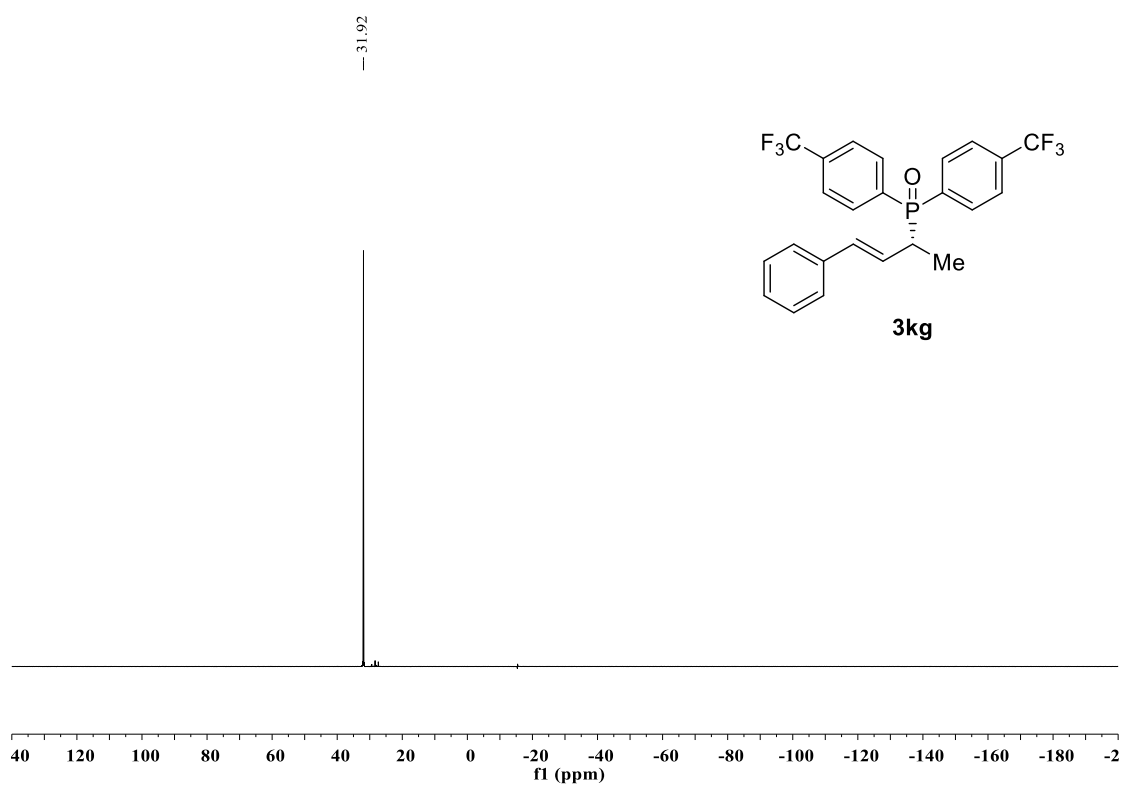

Figure S114.  $^{31}\text{P}$  NMR spectra of **3kg**.

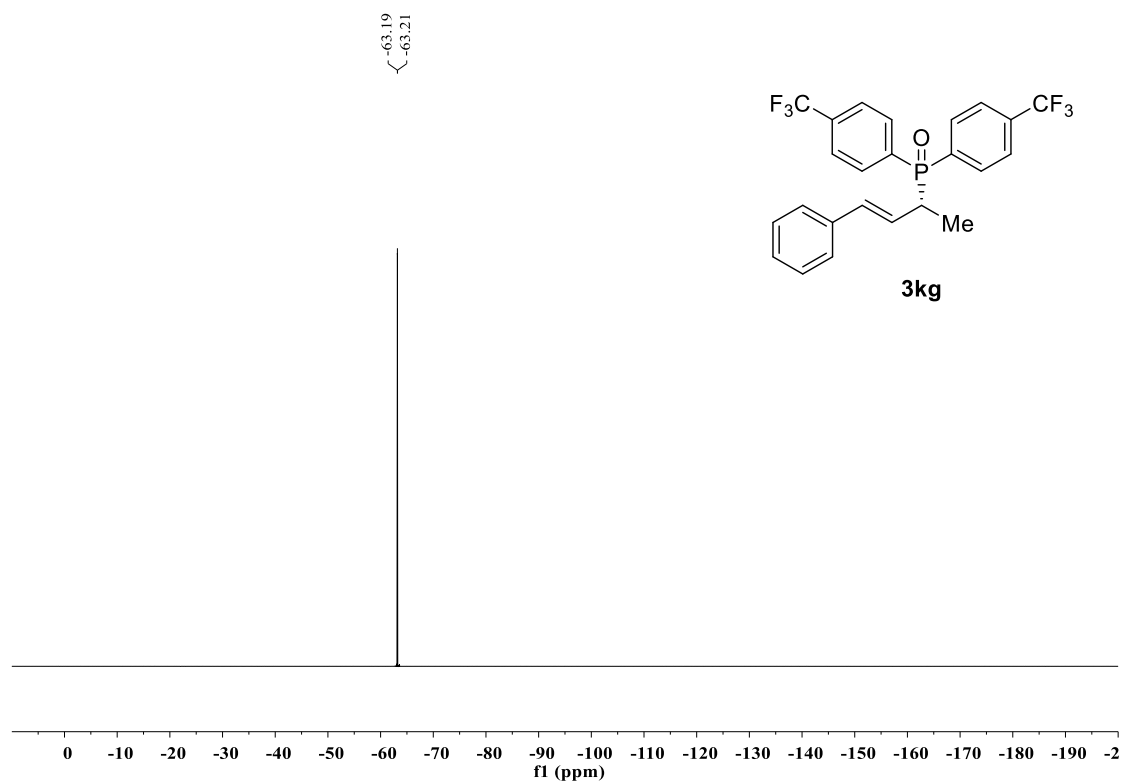

Figure S115. <sup>19</sup>F NMR spectra of **3kg**.

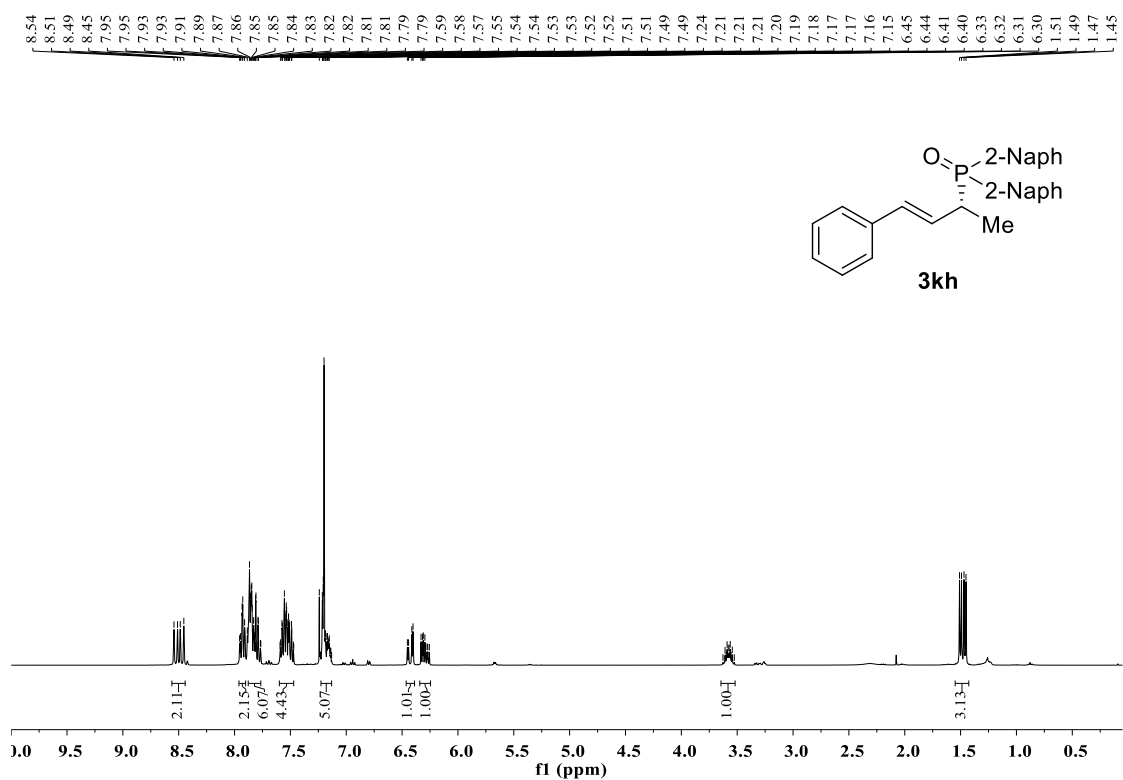

Figure S116. <sup>1</sup>H NMR spectra of **3kh**.

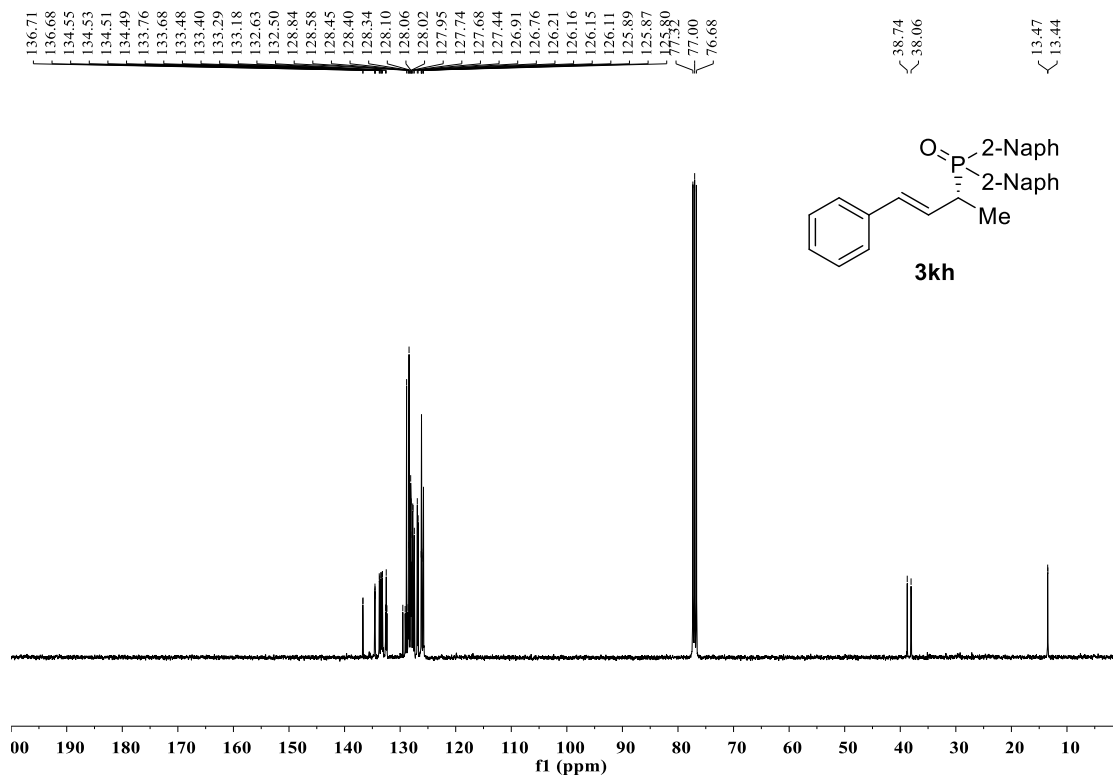

Figure S117. <sup>13</sup>C NMR spectra of **3kh**.

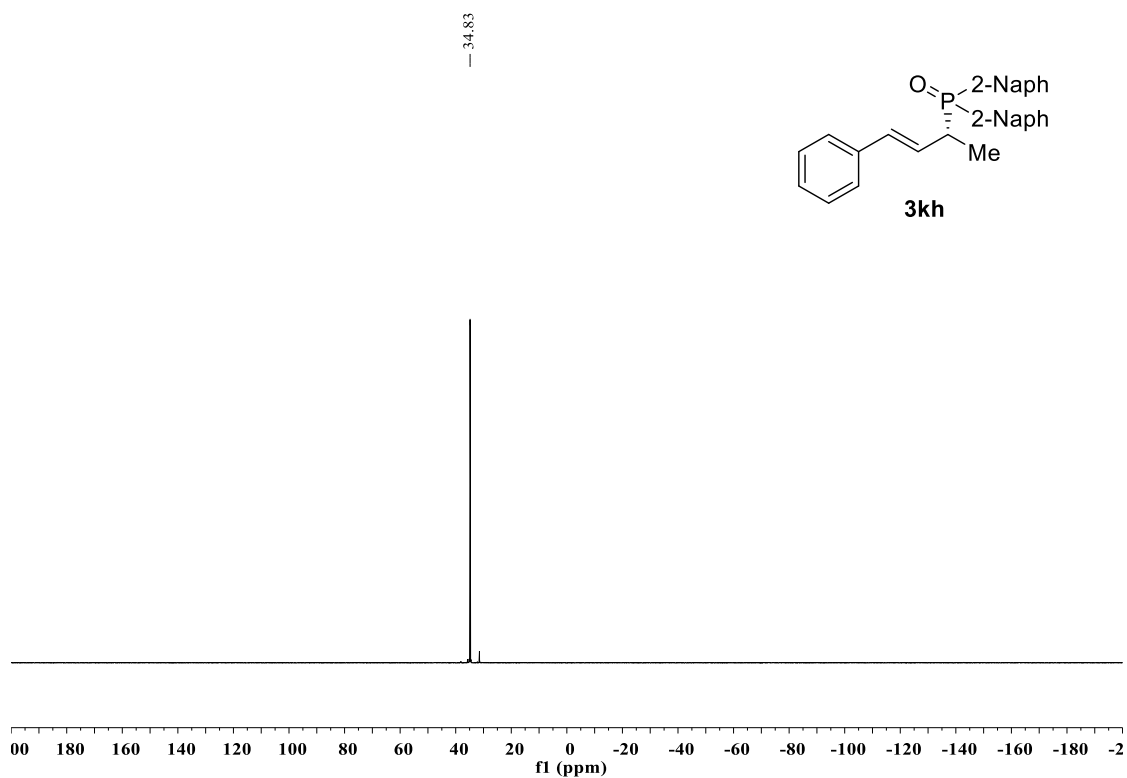

Figure S118. <sup>31</sup>P NMR spectra of **3kh**.



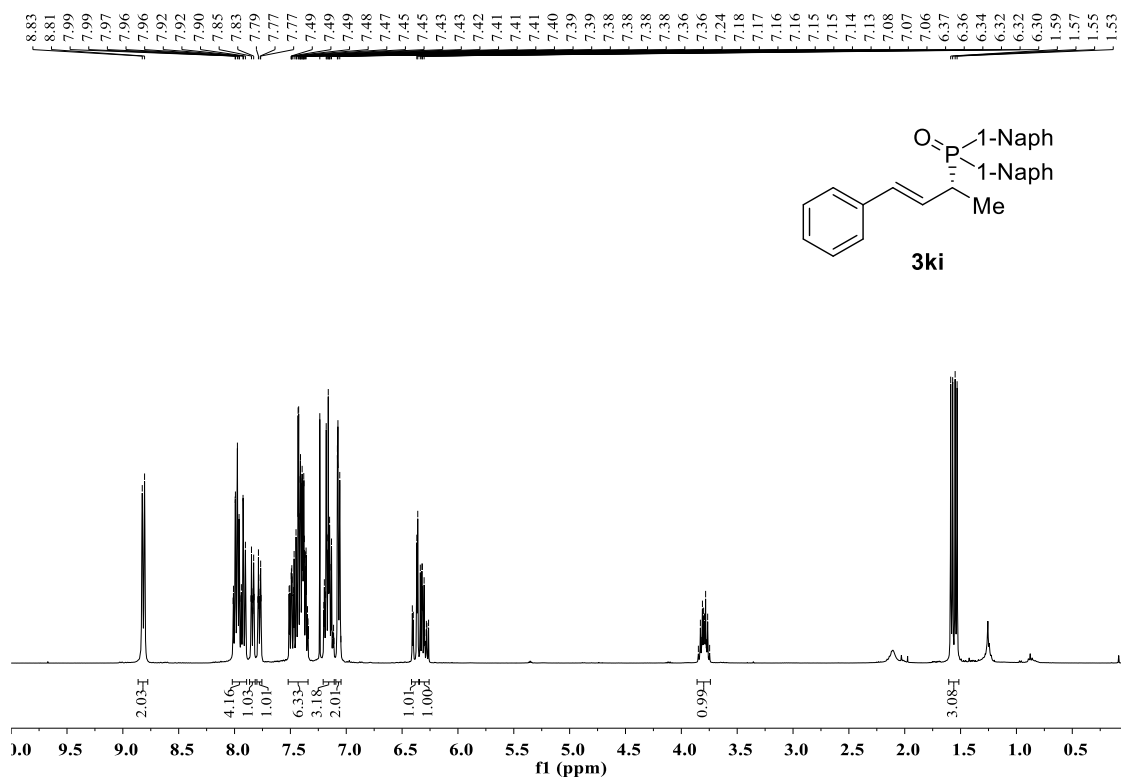

Figure S119. <sup>1</sup>H NMR spectra of **3ki**.

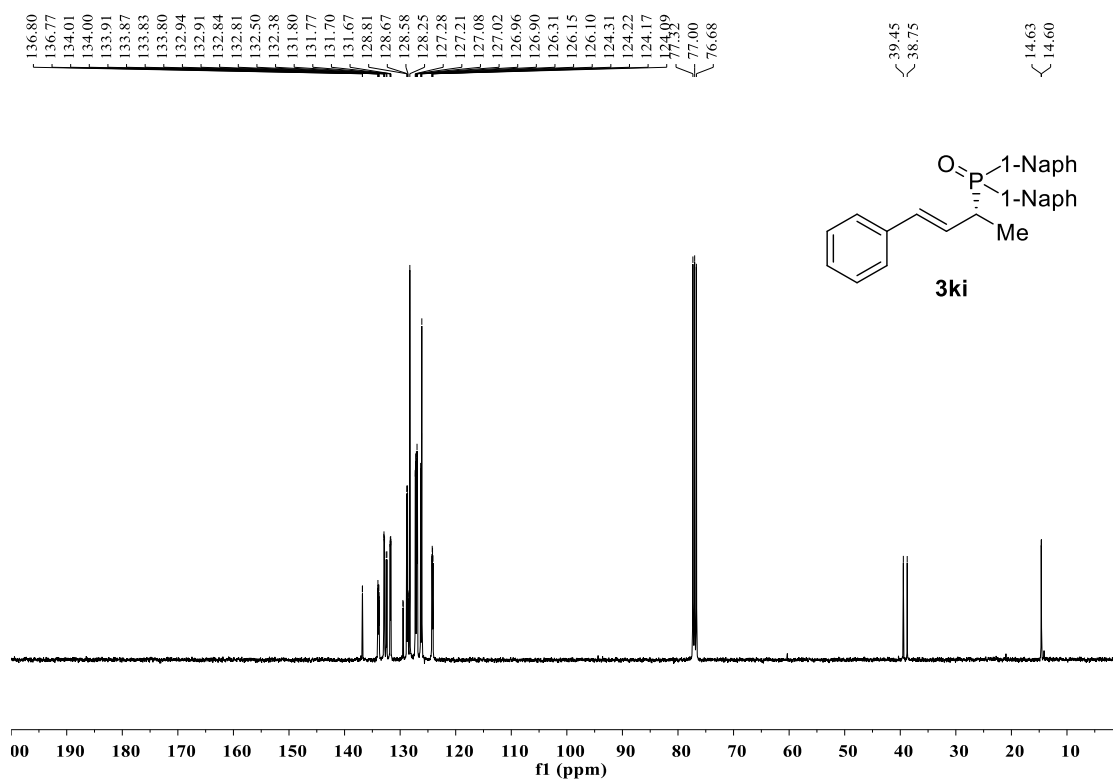

Figure S120. <sup>13</sup>C NMR spectra of **3ki**.

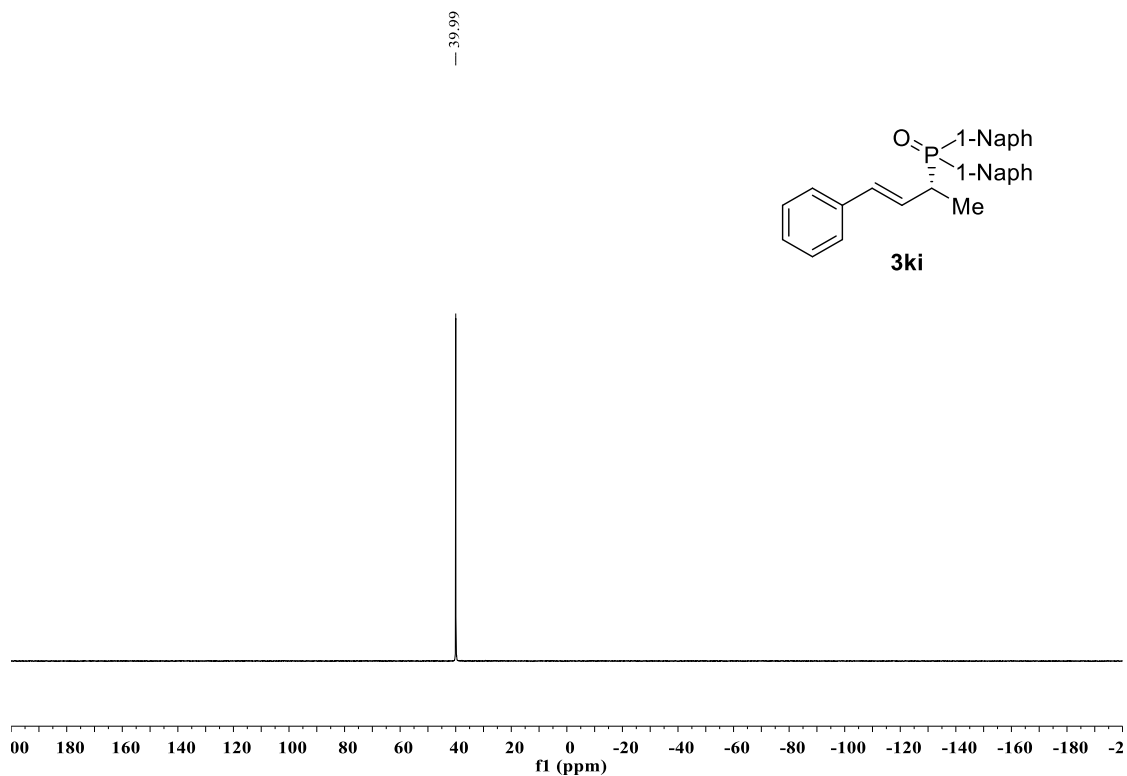

**Figure S121.**  $^{31}\text{P}$  NMR spectra of **3ki**.

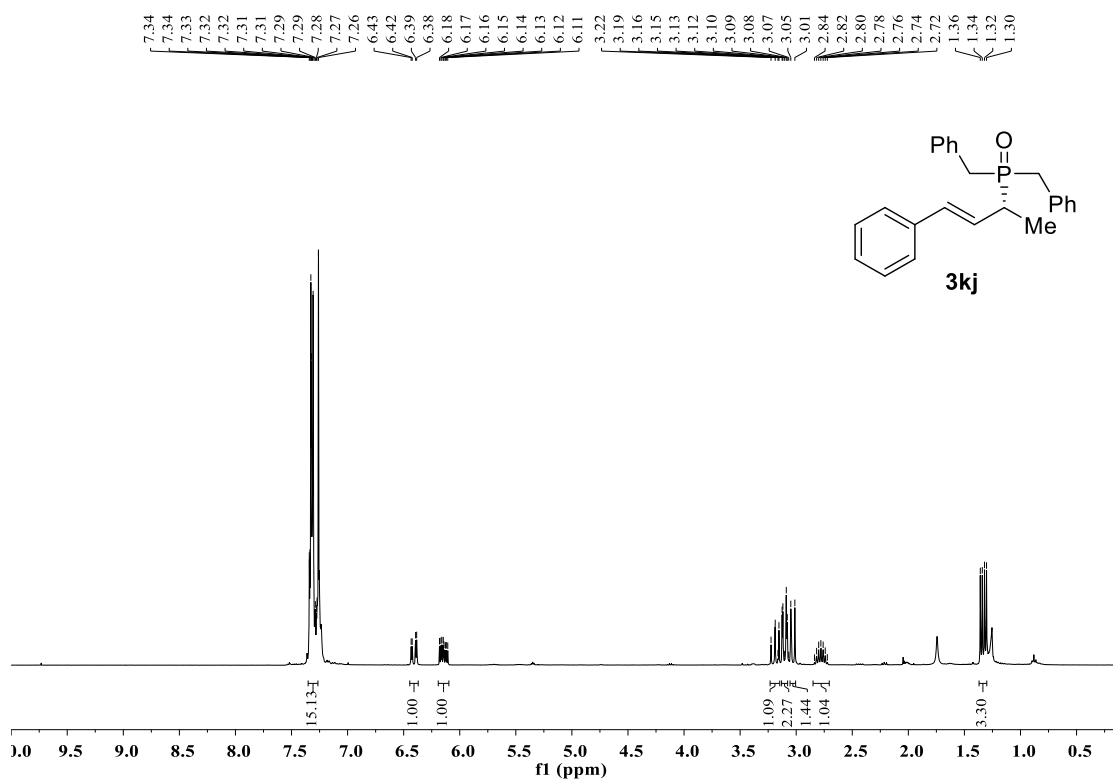

**Figure S122.**  $^1\text{H}$  NMR spectra of **3kj**.

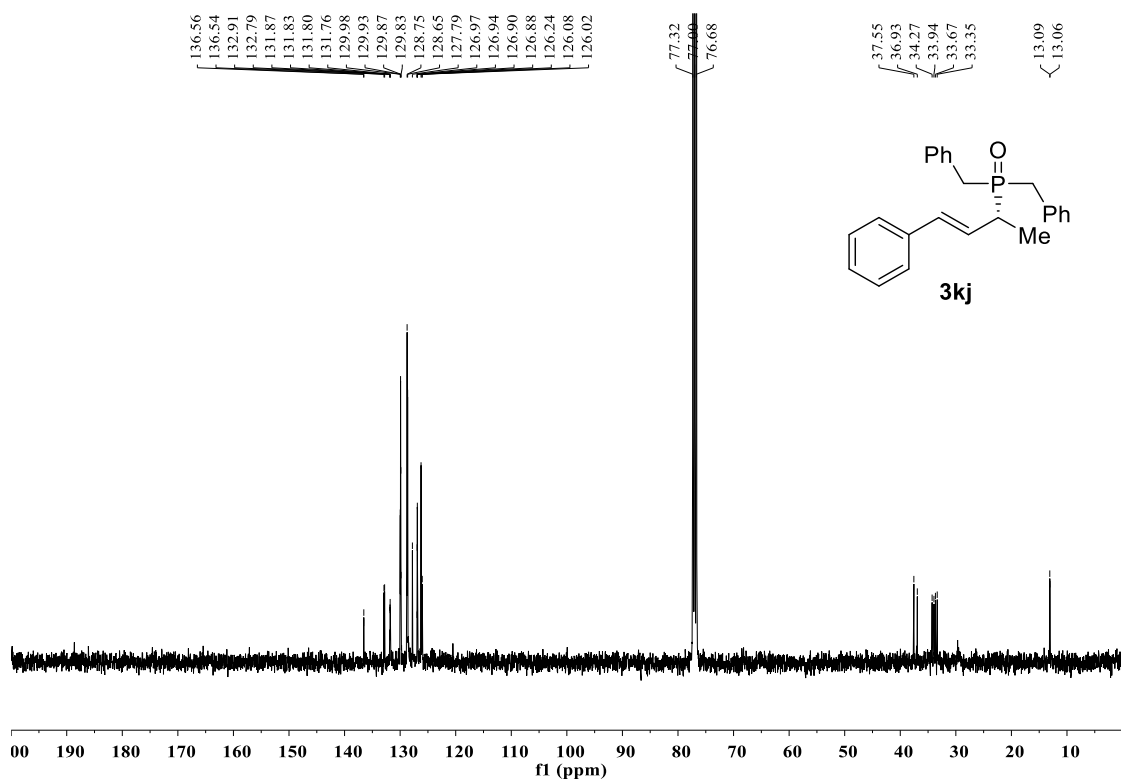

Figure S123.  $^{13}\text{C}$  NMR spectra of **3kj**.

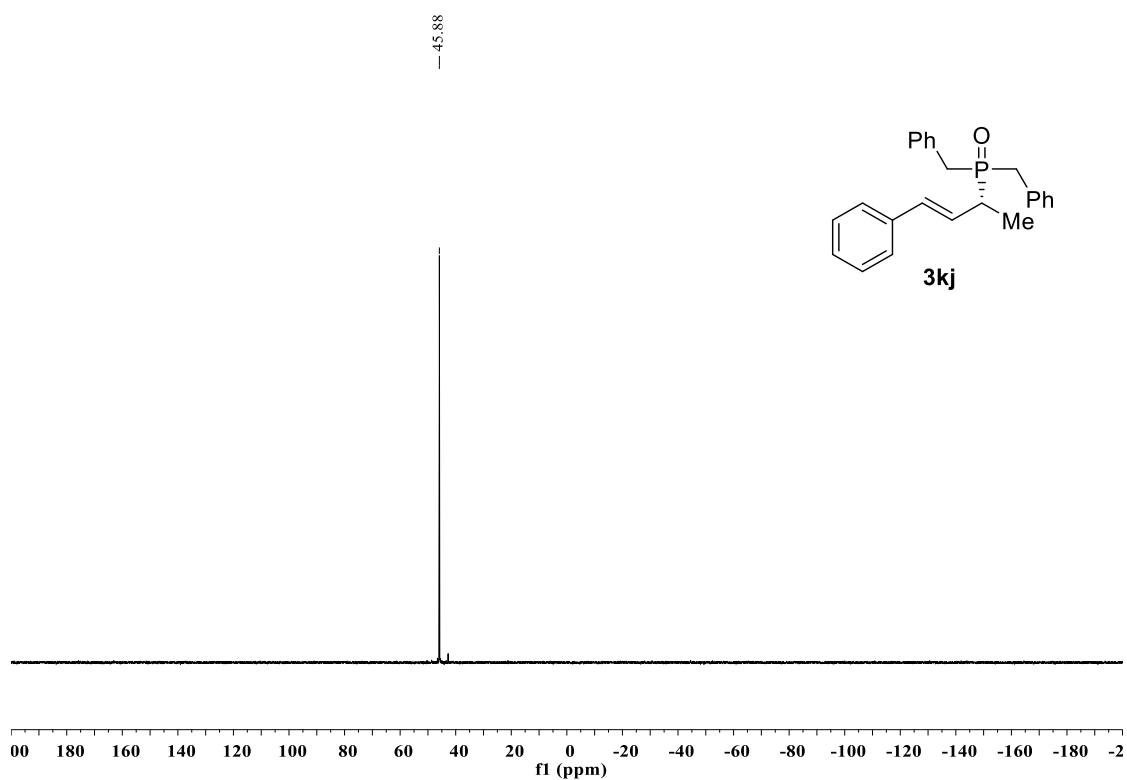

Figure S124.  $^{31}\text{P}$  NMR spectra of **3kj**.

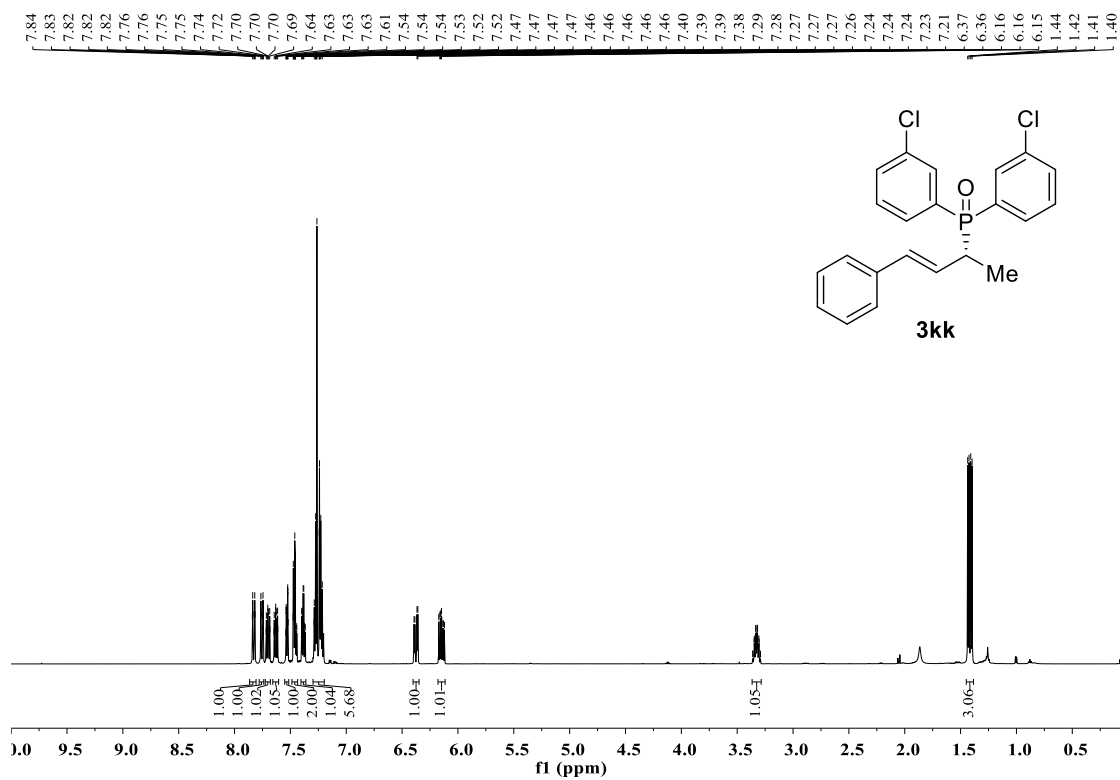

Figure S125.  $^1\text{H}$  NMR spectra of **3kk**.

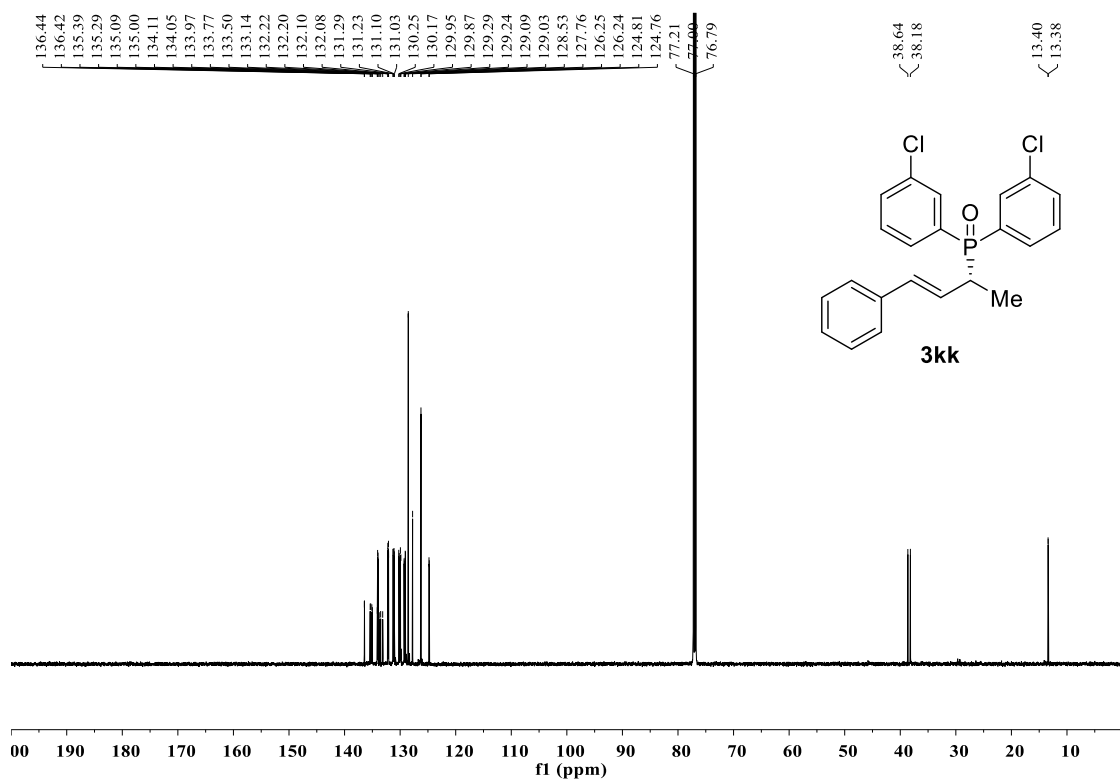

Figure S126.  $^{13}\text{C}$  NMR spectra of **3kk**.

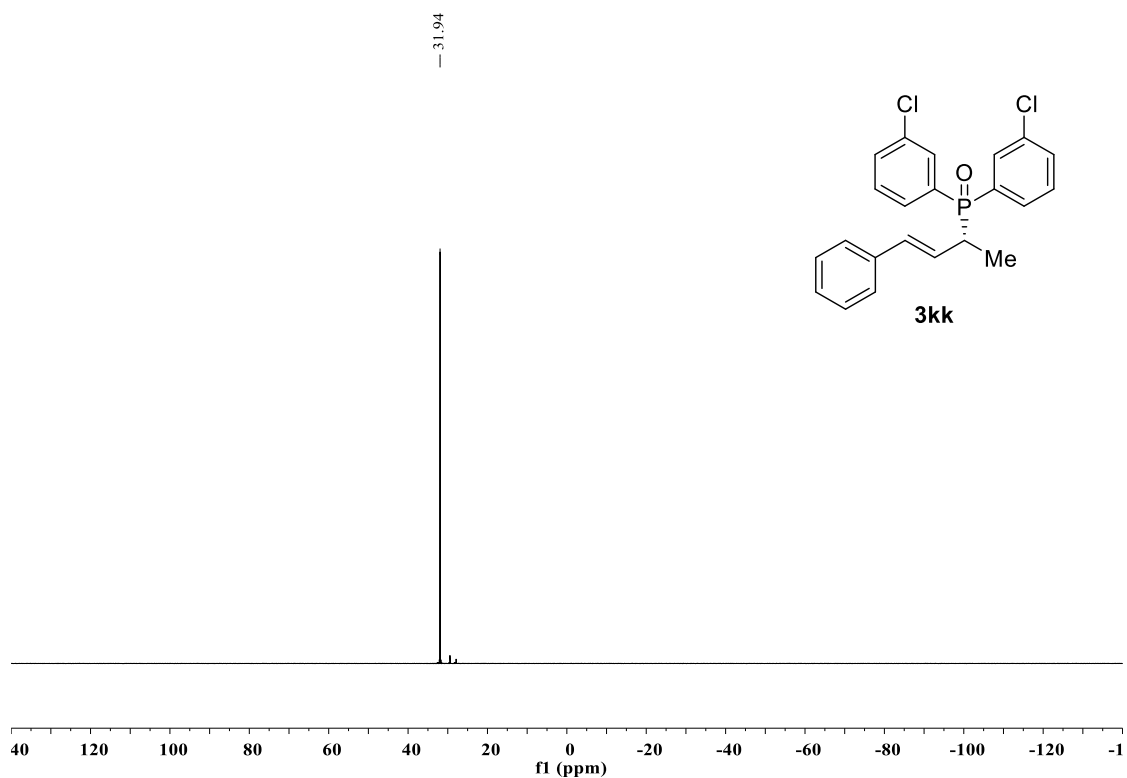

Figure S127.  $^{31}\text{P}$  NMR spectra of **3kk**.

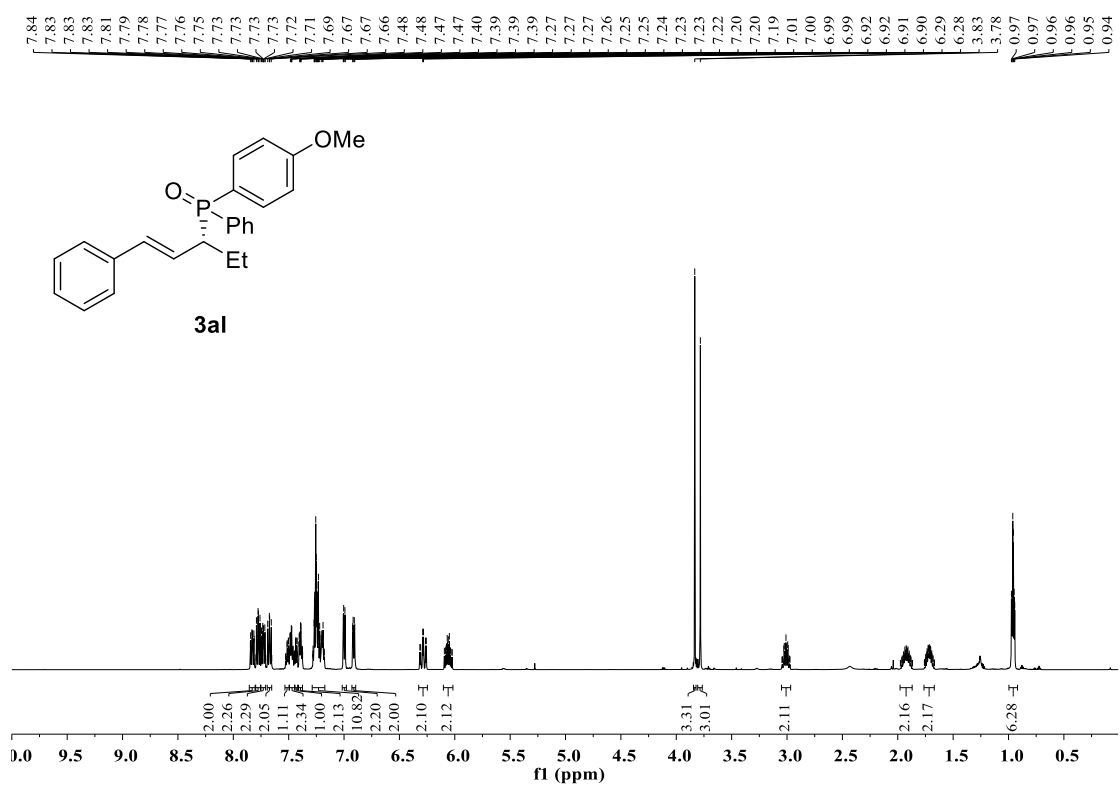

Figure S128.  $^1\text{H}$  NMR spectra of **3al**.

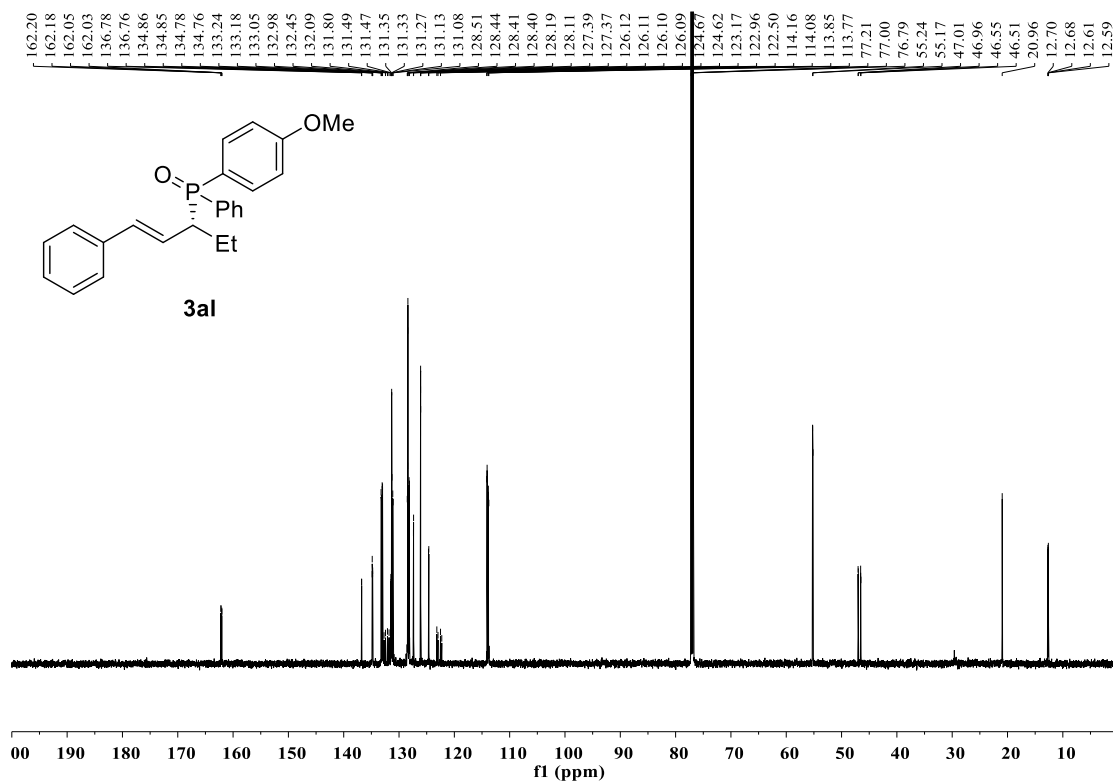

Figure S129. <sup>13</sup>C NMR spectra of **3al**.

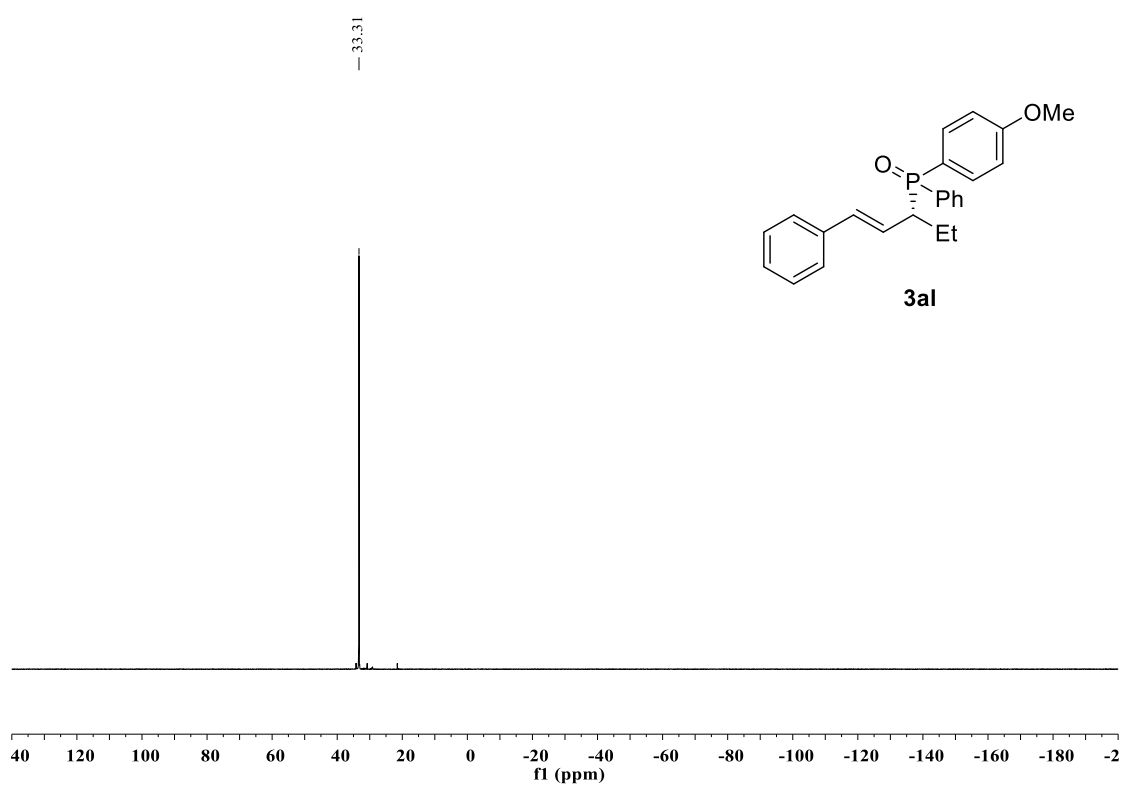

Figure S130. <sup>31</sup>P NMR spectra of **3al**.

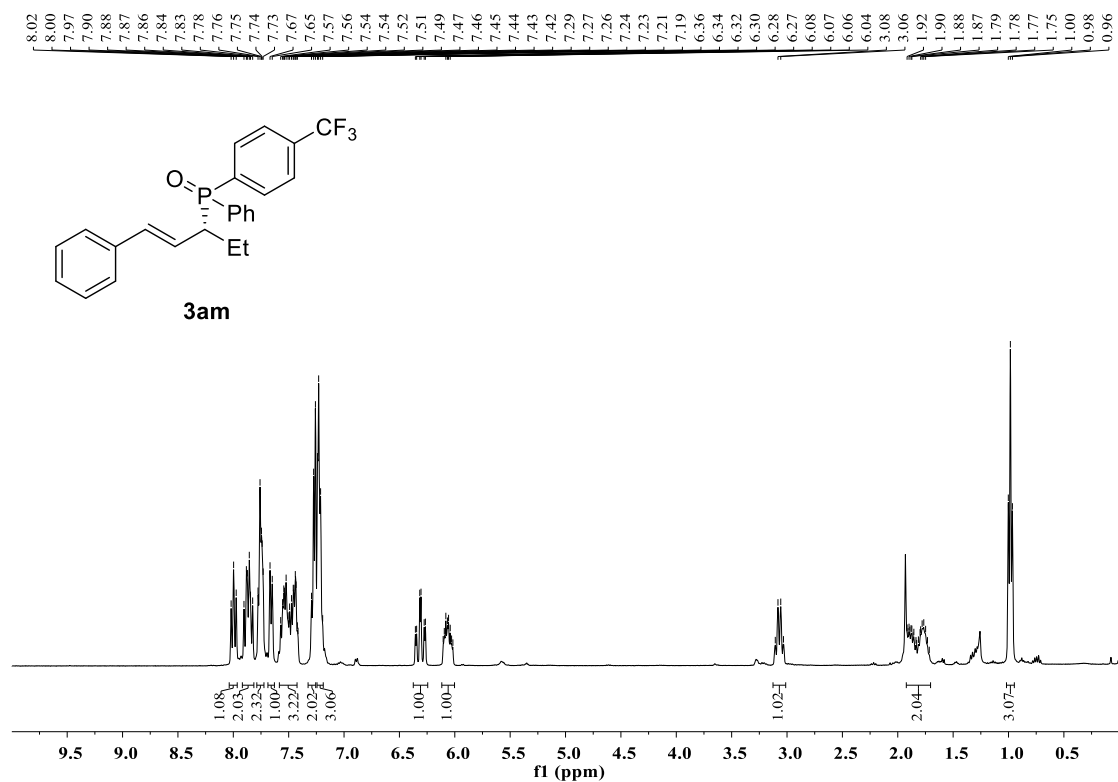

Figure S131.  $^1\text{H}$  NMR spectra of **3am**.

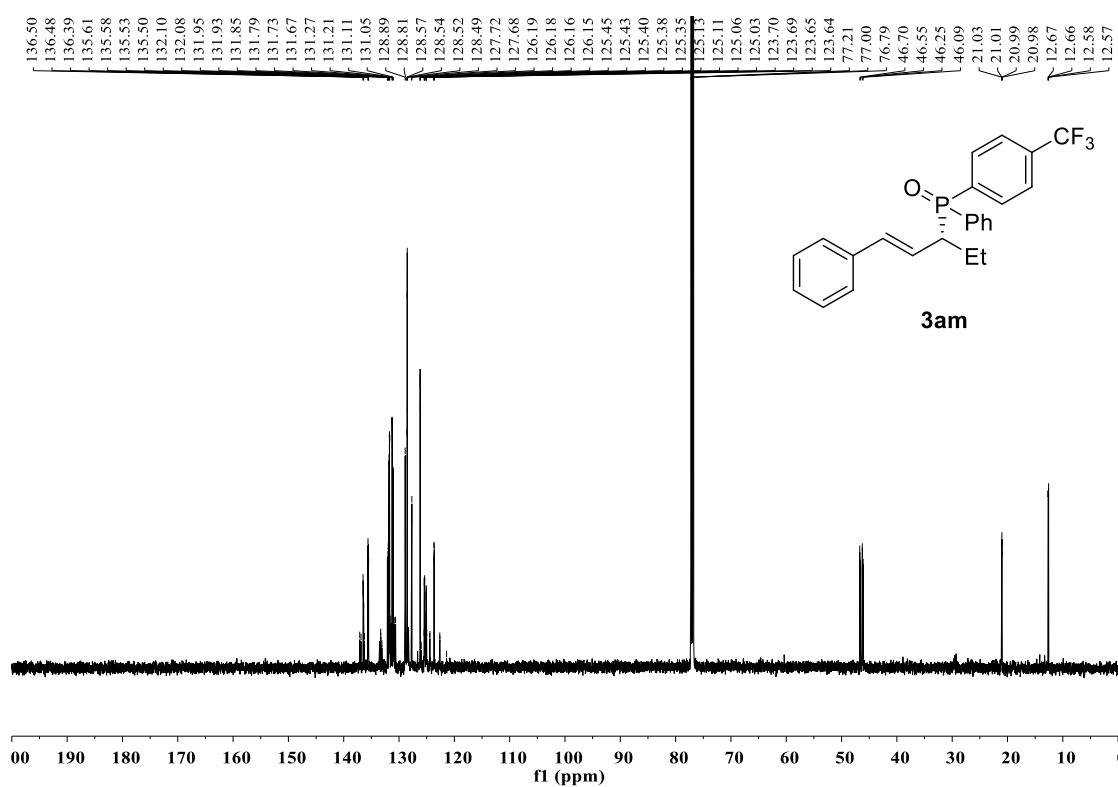

Figure S132.  $^{13}\text{C}$  NMR spectra of **3am**.

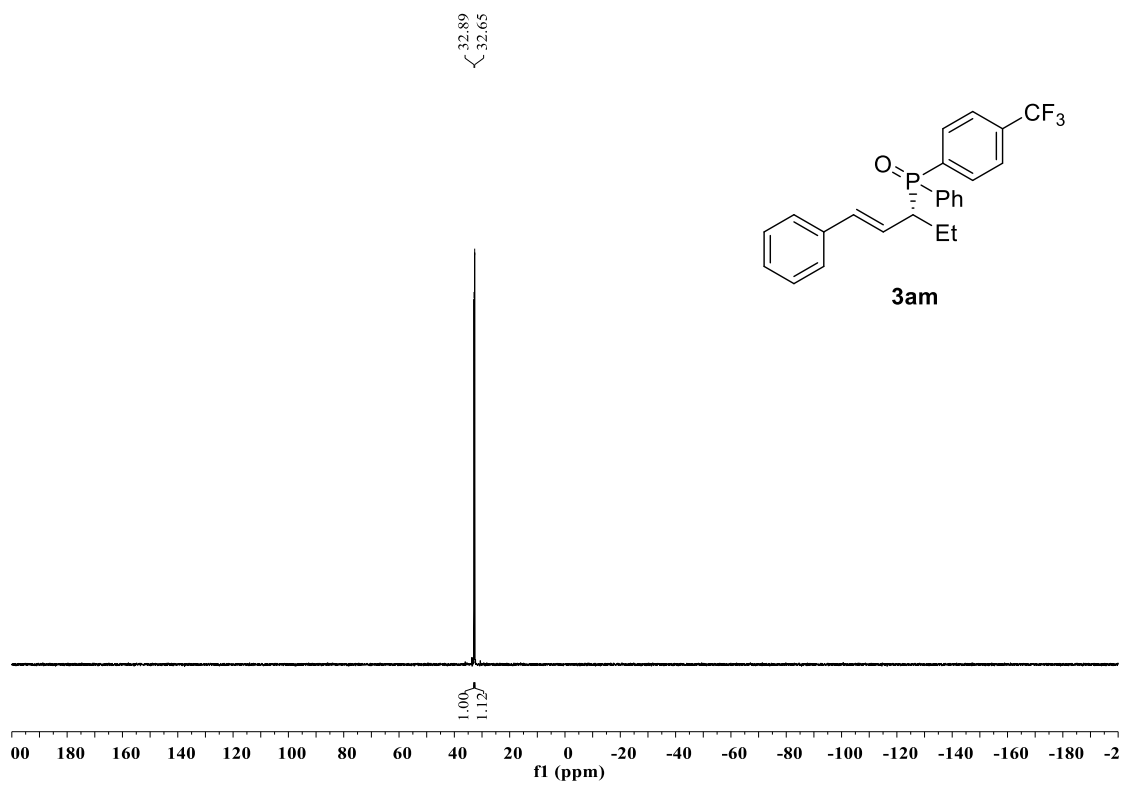

Figure S133.  $^{31}\text{P}$  NMR spectra of **3am**.

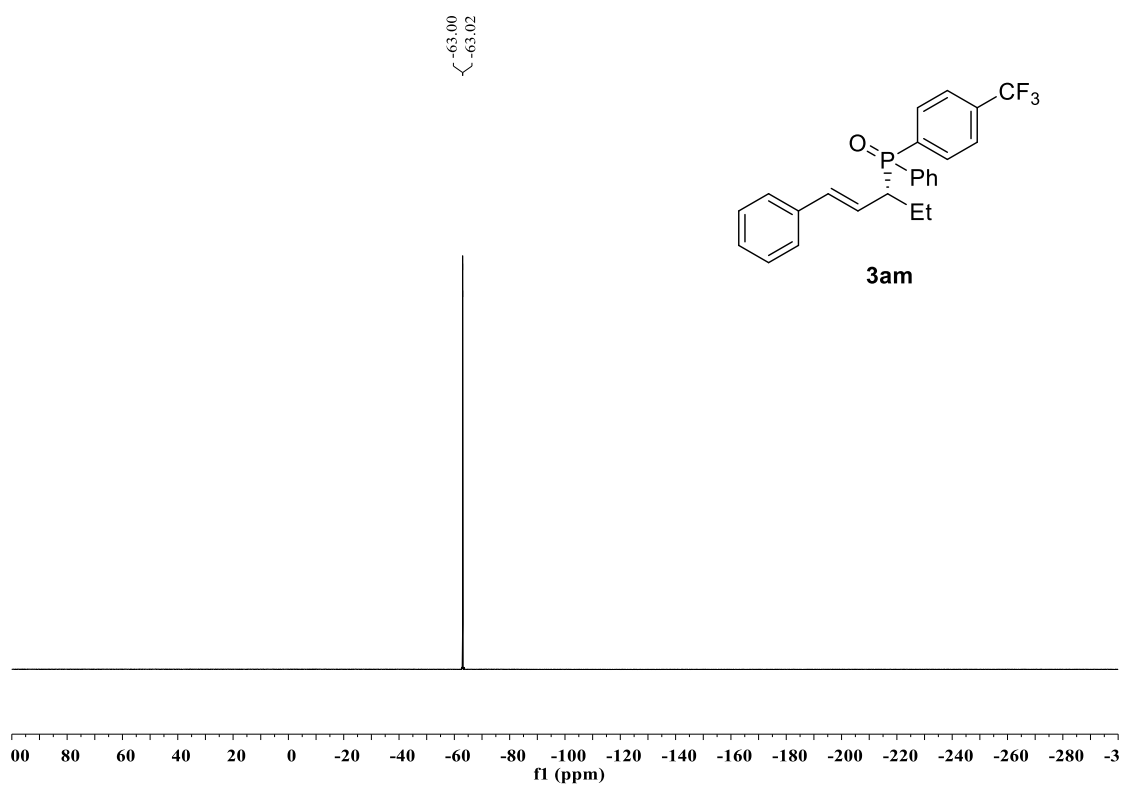

Figure S134.  $^{19}\text{F}$  NMR spectra of **3am**.



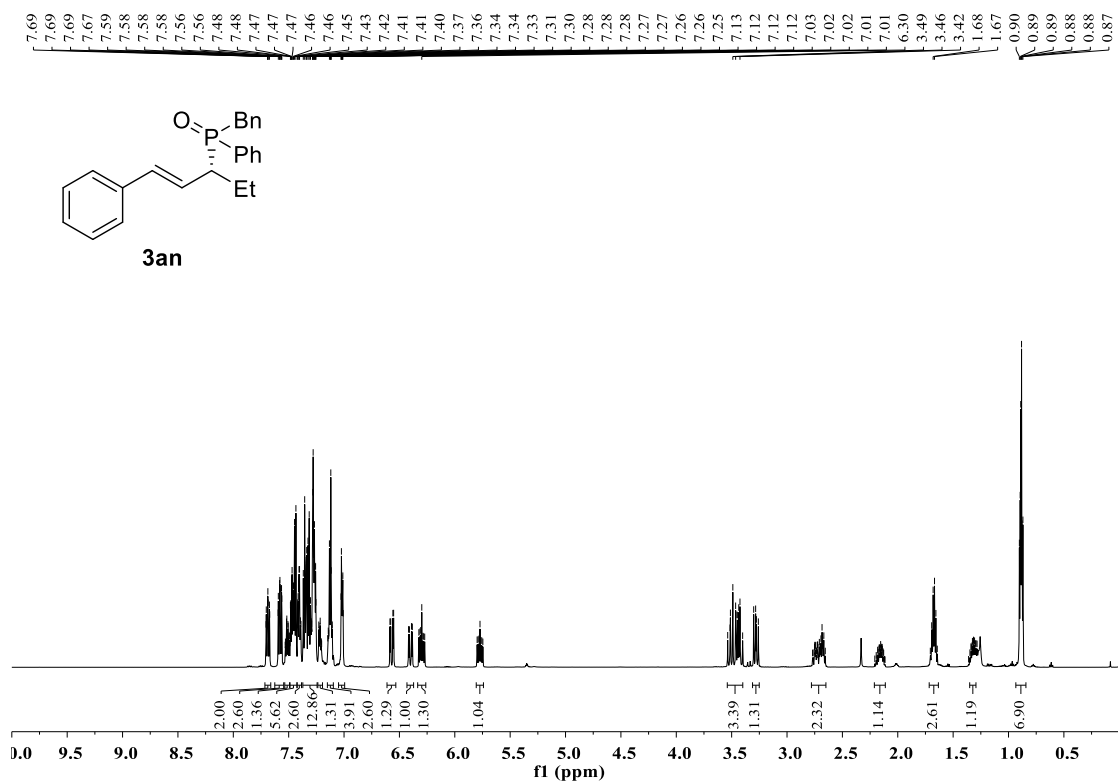

Figure S135. <sup>1</sup>H NMR spectra of **3an**.

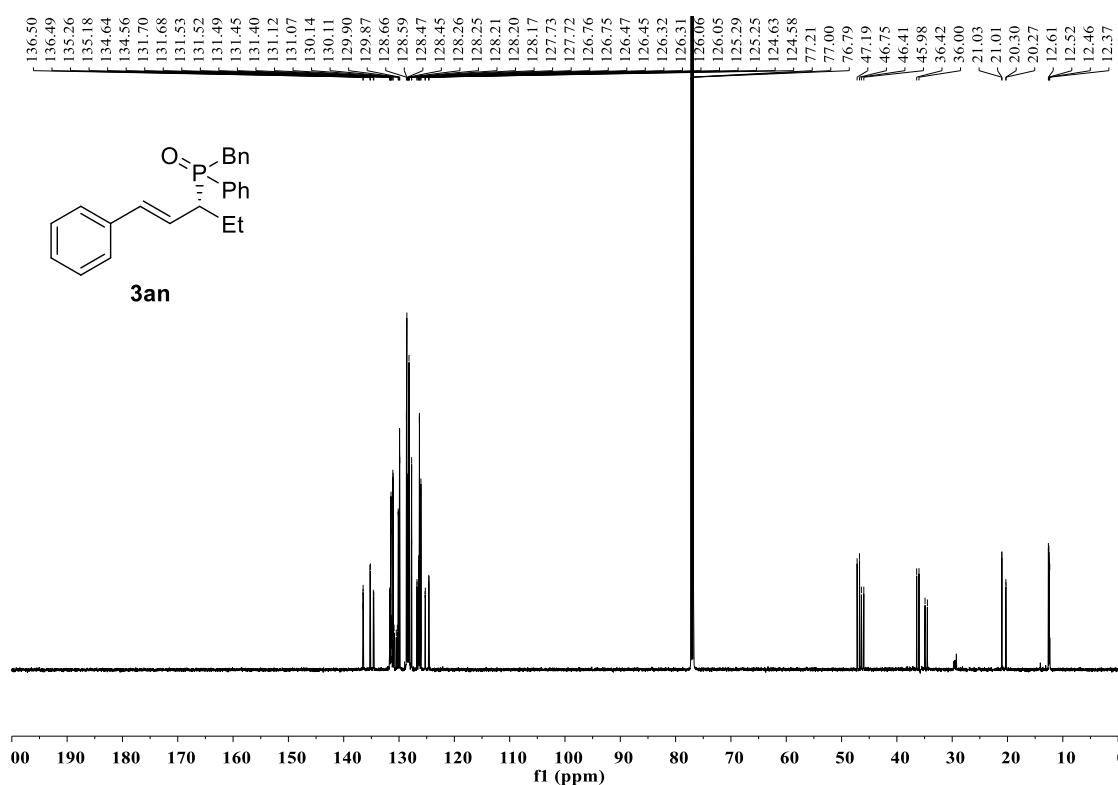

Figure S136. <sup>13</sup>C NMR spectra of **3an**.

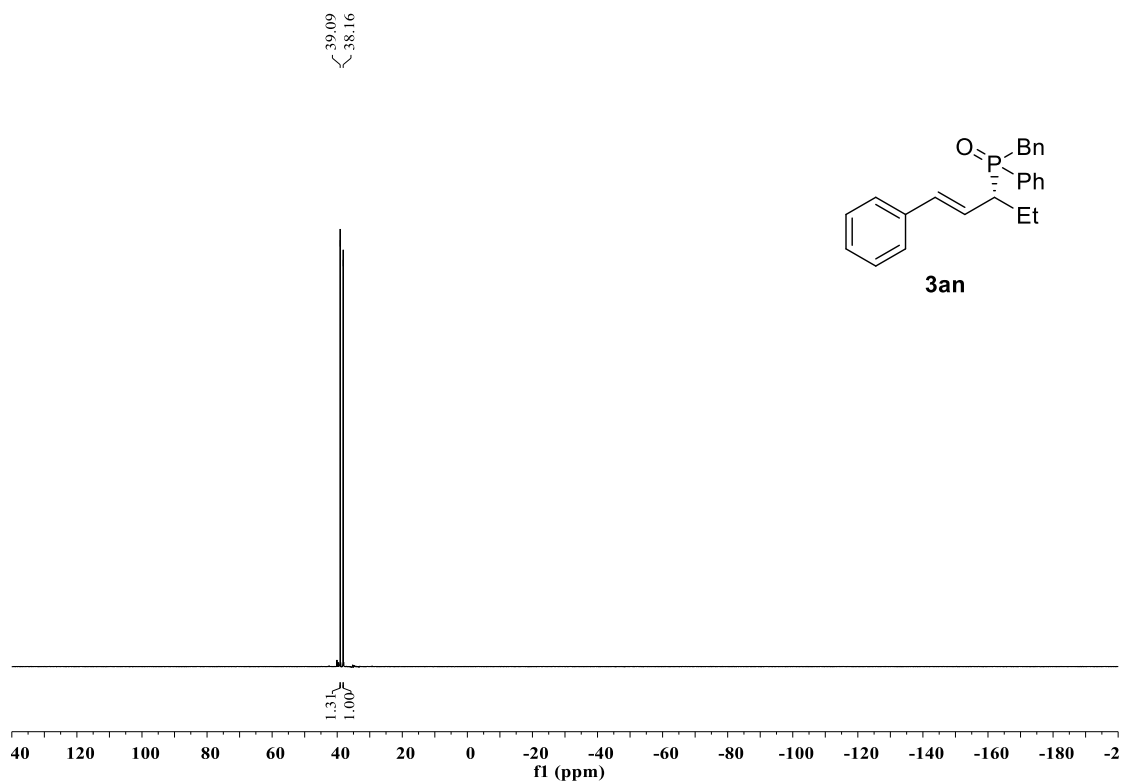

Figure S137. <sup>31</sup>P NMR spectra of **3an**.

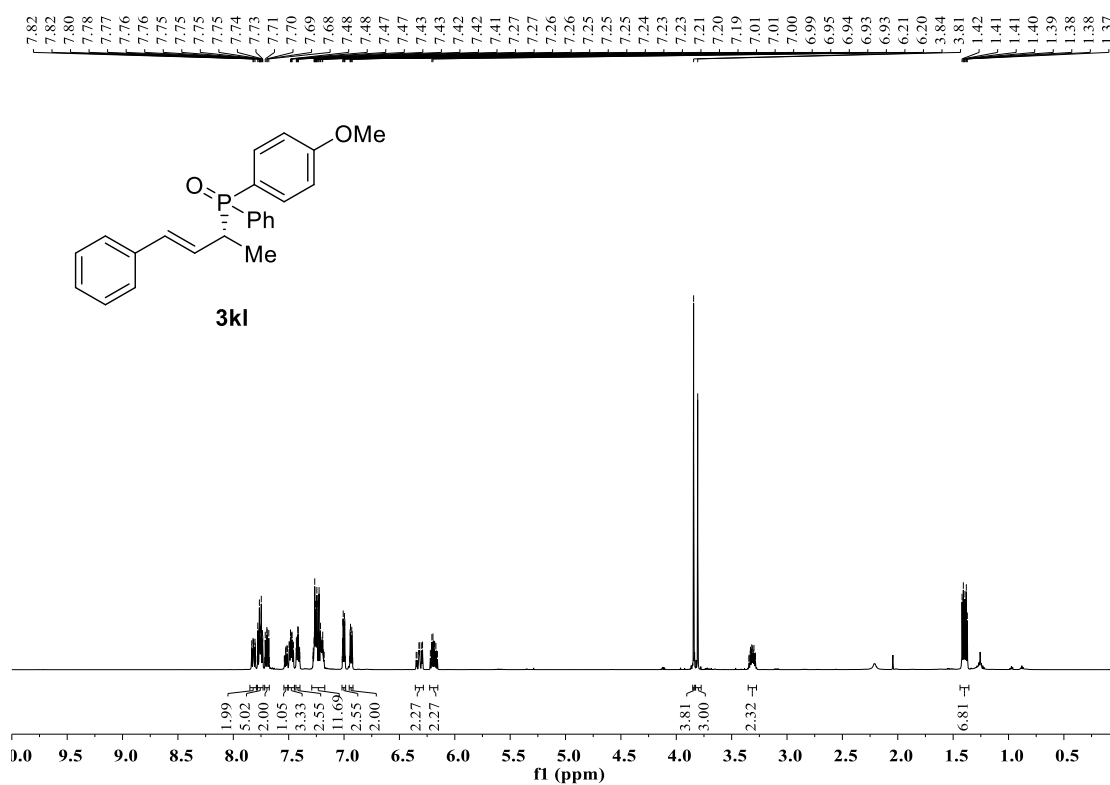

Figure S138. <sup>1</sup>H NMR spectra of **3kl**.

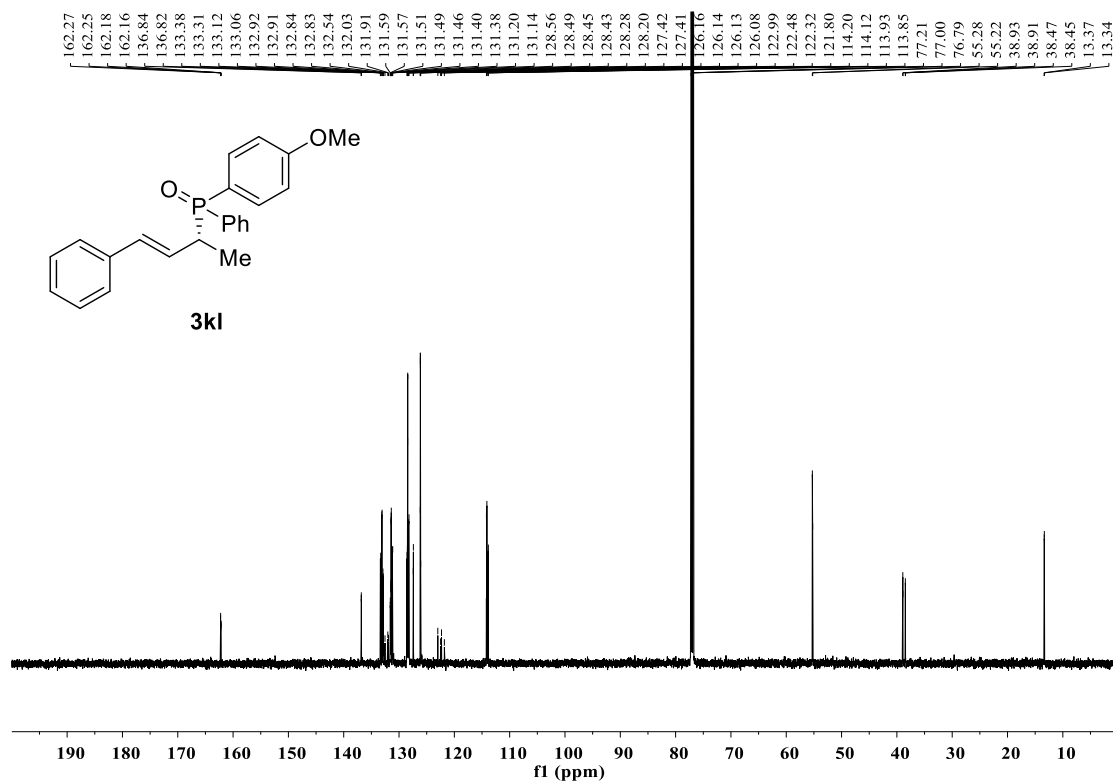

Figure S139. <sup>13</sup>C NMR spectra of **3kl**.

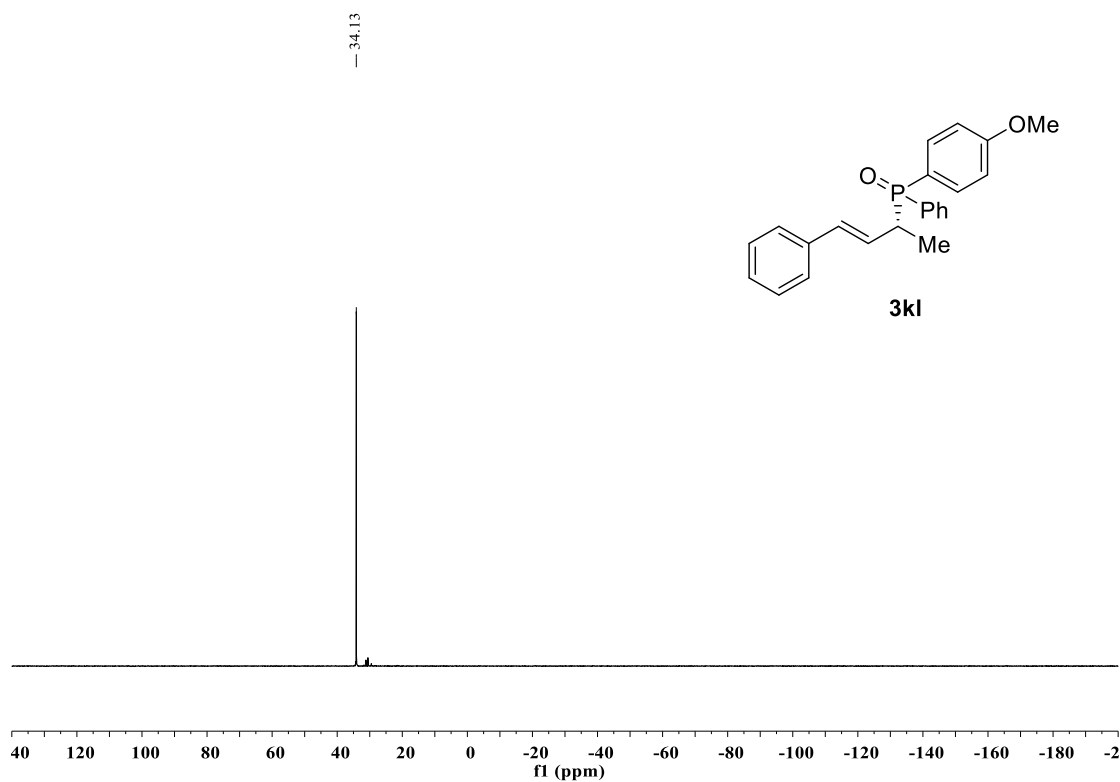

Figure S140. <sup>31</sup>P NMR spectra of **3kl**.

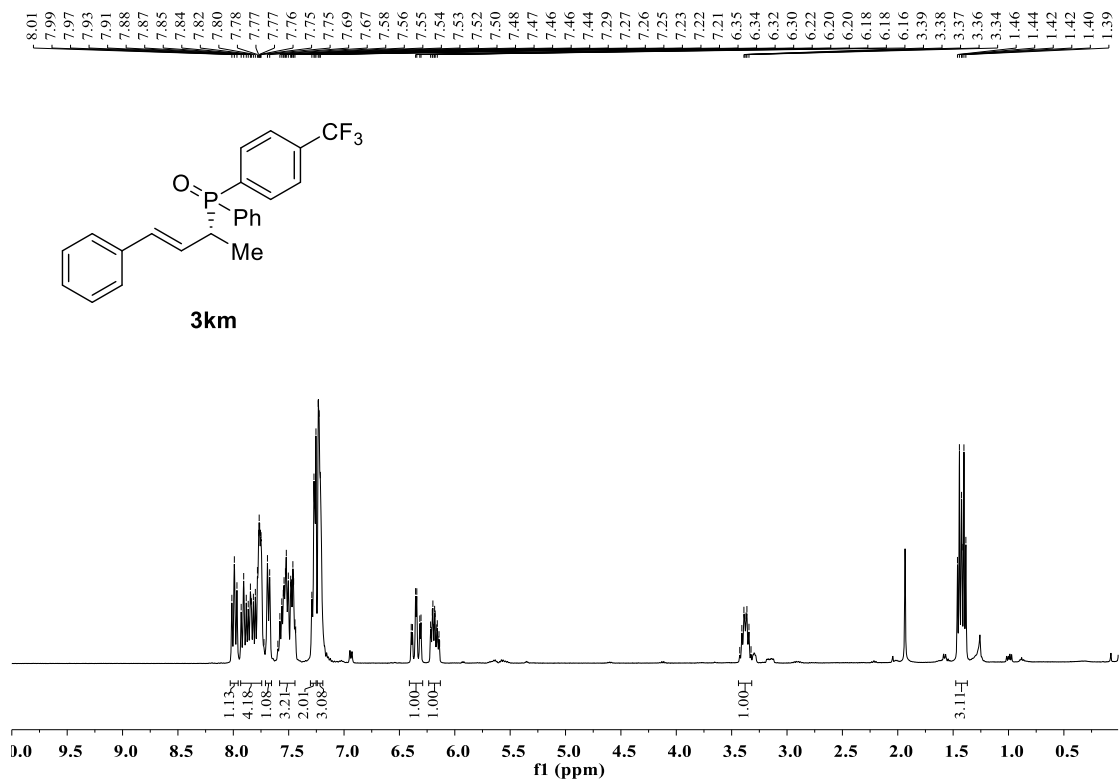

Figure S141. <sup>1</sup>H NMR spectra of 3km.

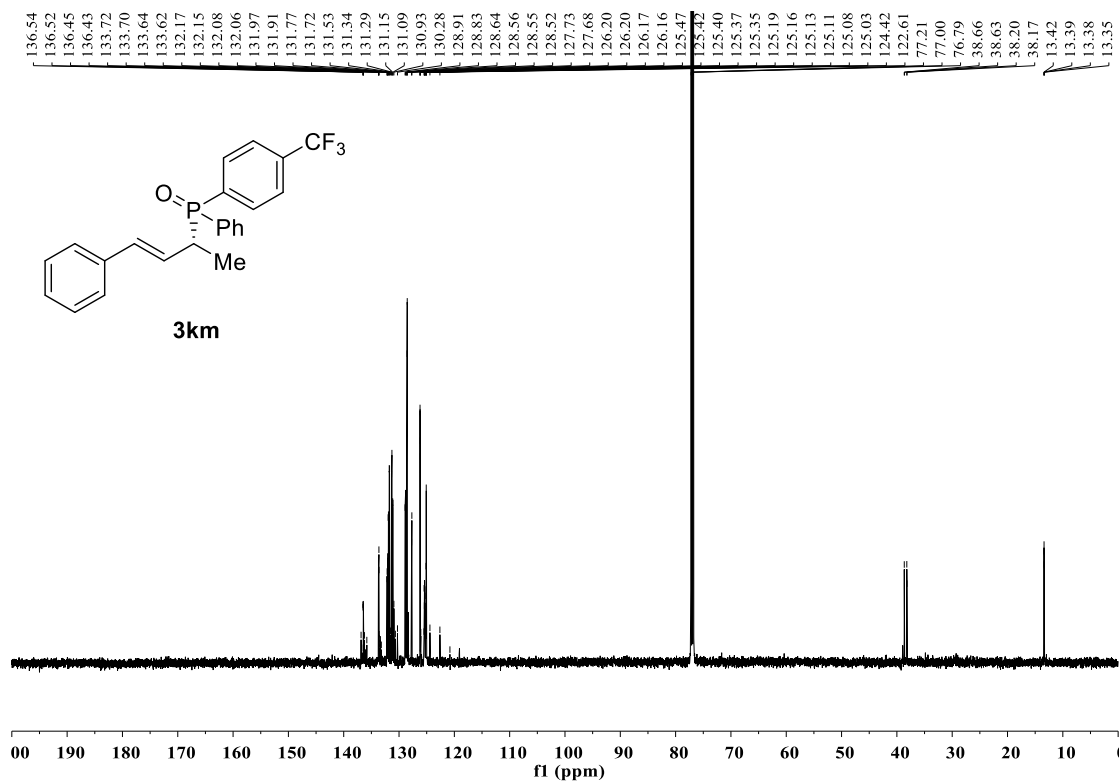

Figure S142. <sup>13</sup>C NMR spectra of 3km.

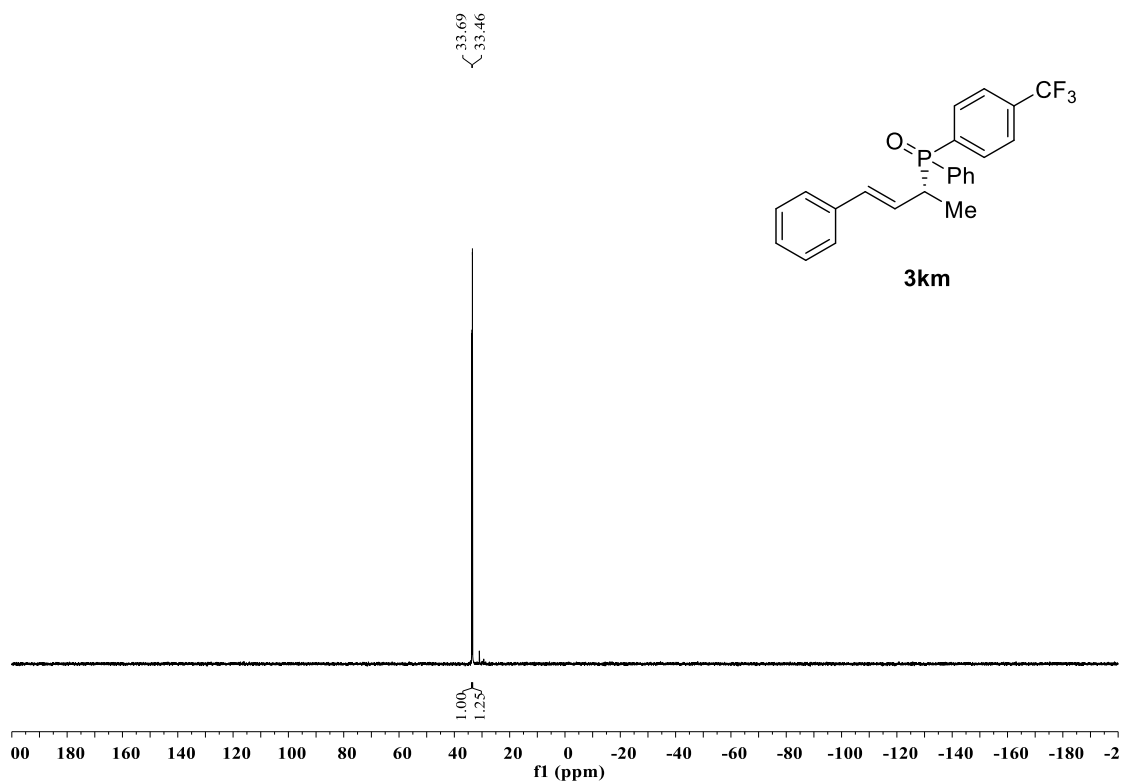

Figure S143.  $^{31}\text{P}$  NMR spectra of **3km**.

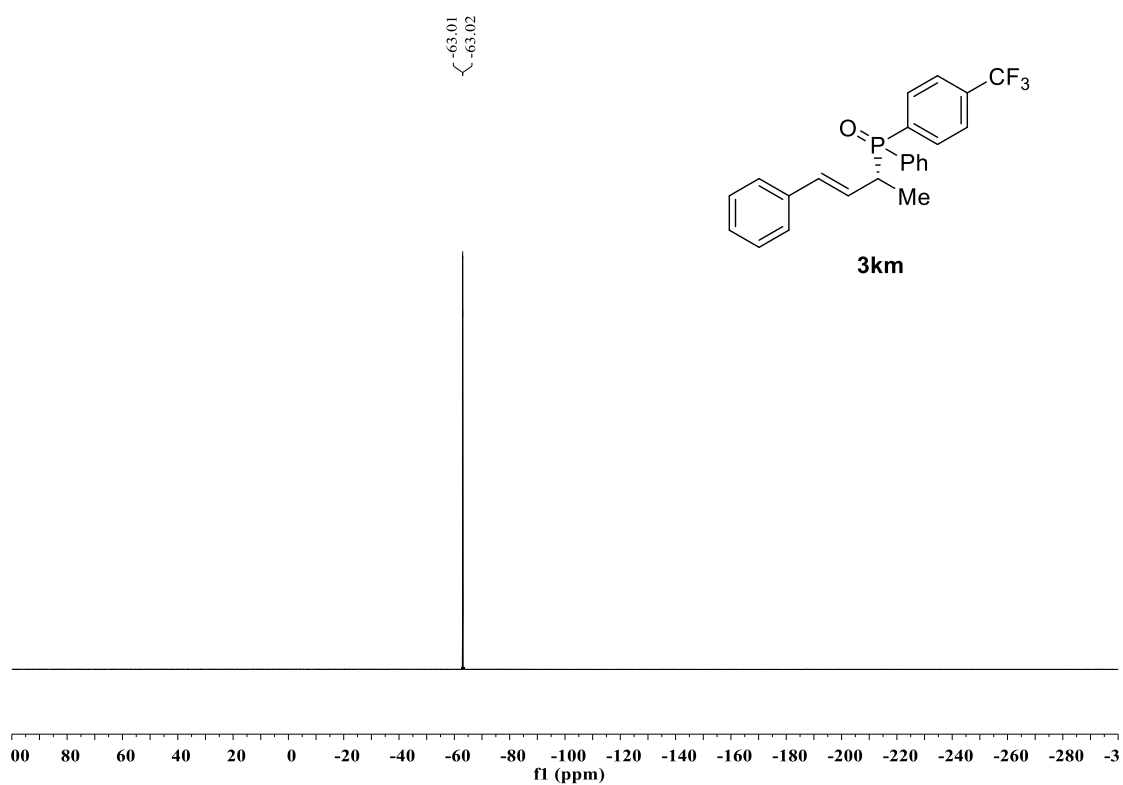

Figure S144.  $^{19}\text{F}$  NMR spectra of **3km**.

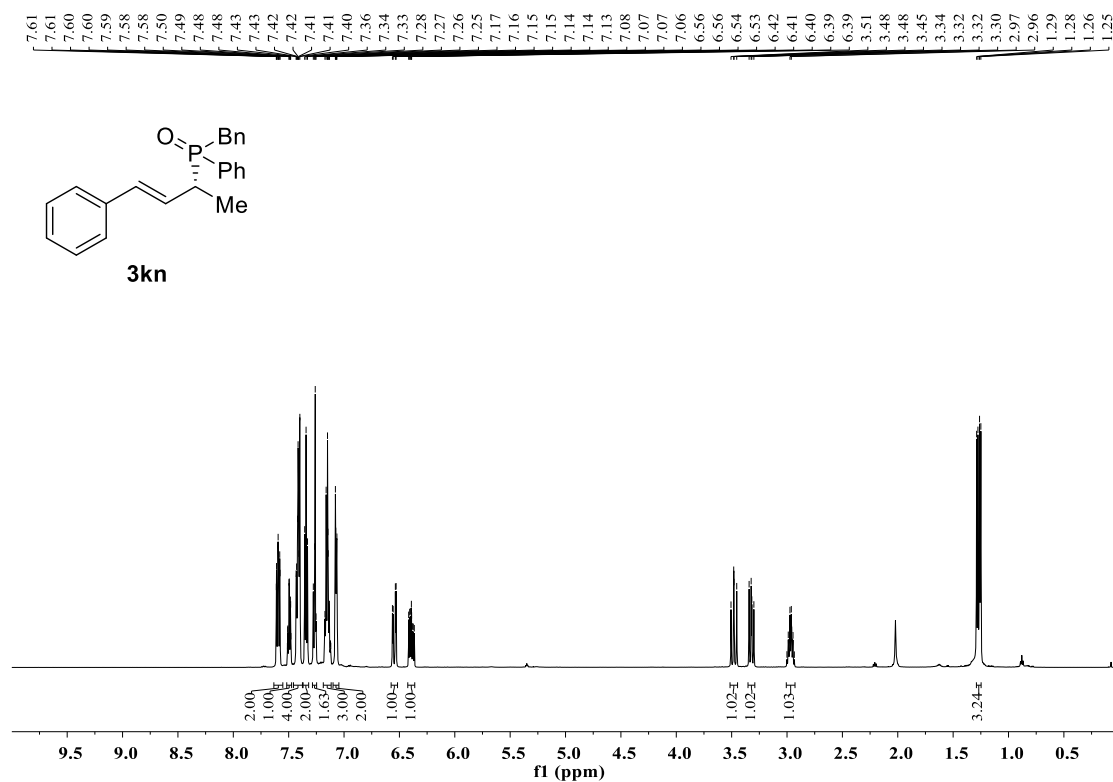

Figure S145.  $^1\text{H}$  NMR spectra of **3kn**.

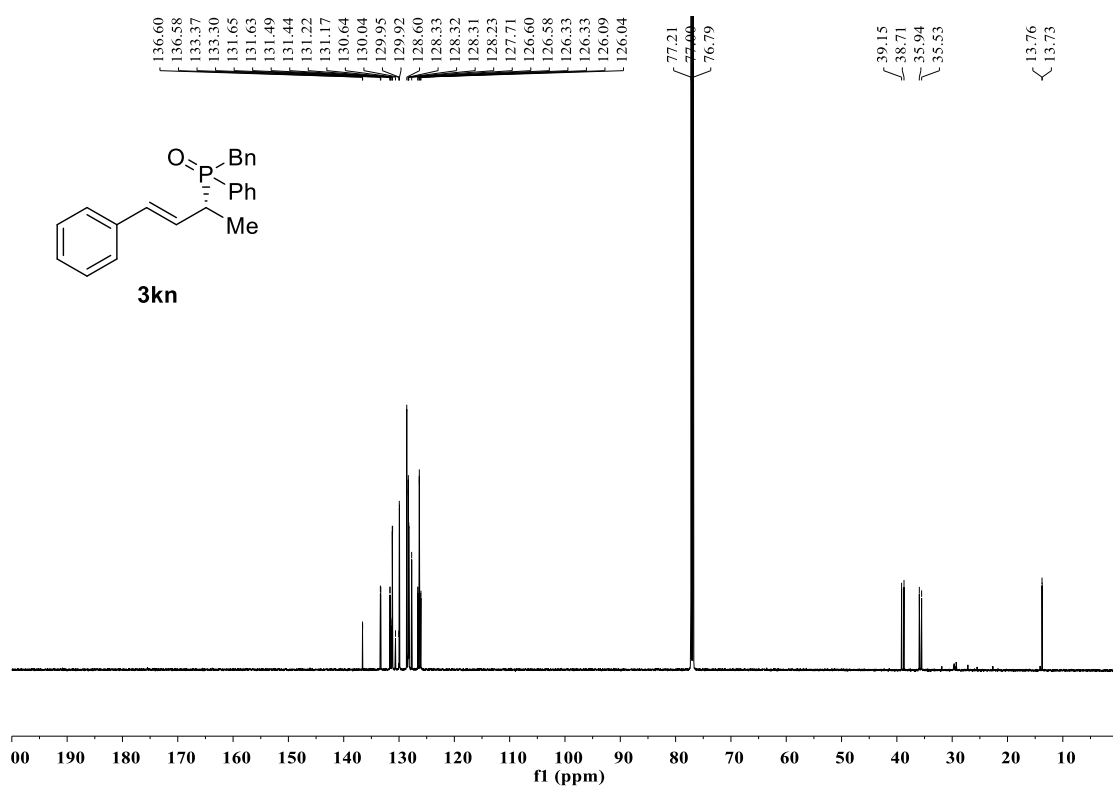

Figure S146.  $^{13}\text{C}$  NMR spectra of **3kn**.

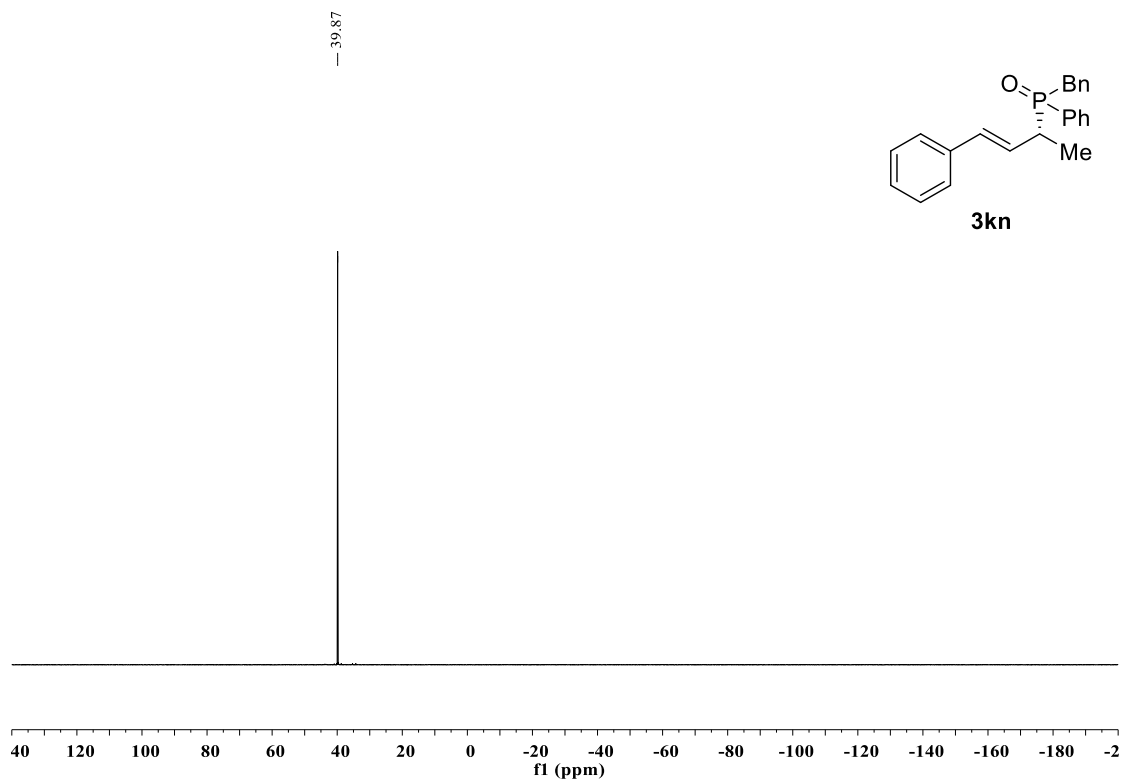

Figure S147.  $^{31}\text{P}$  NMR spectra of **3kn**.

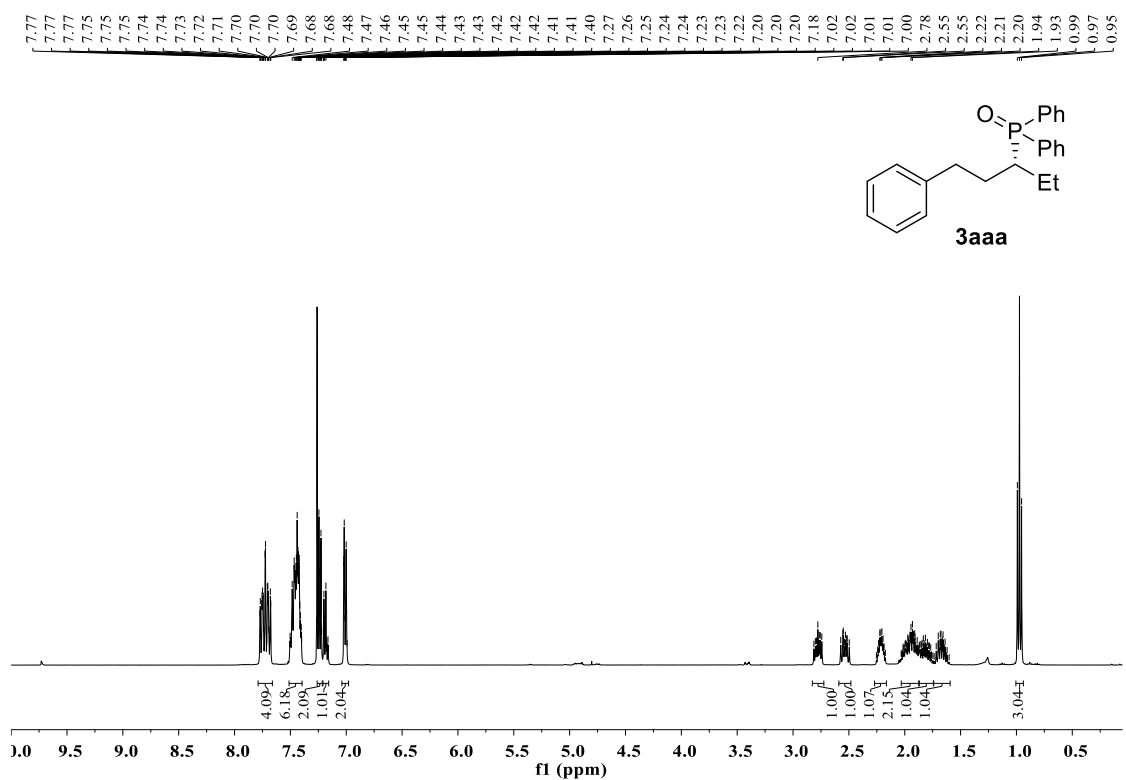

Figure S148.  $^1\text{H}$  NMR spectra of **3aaa**.

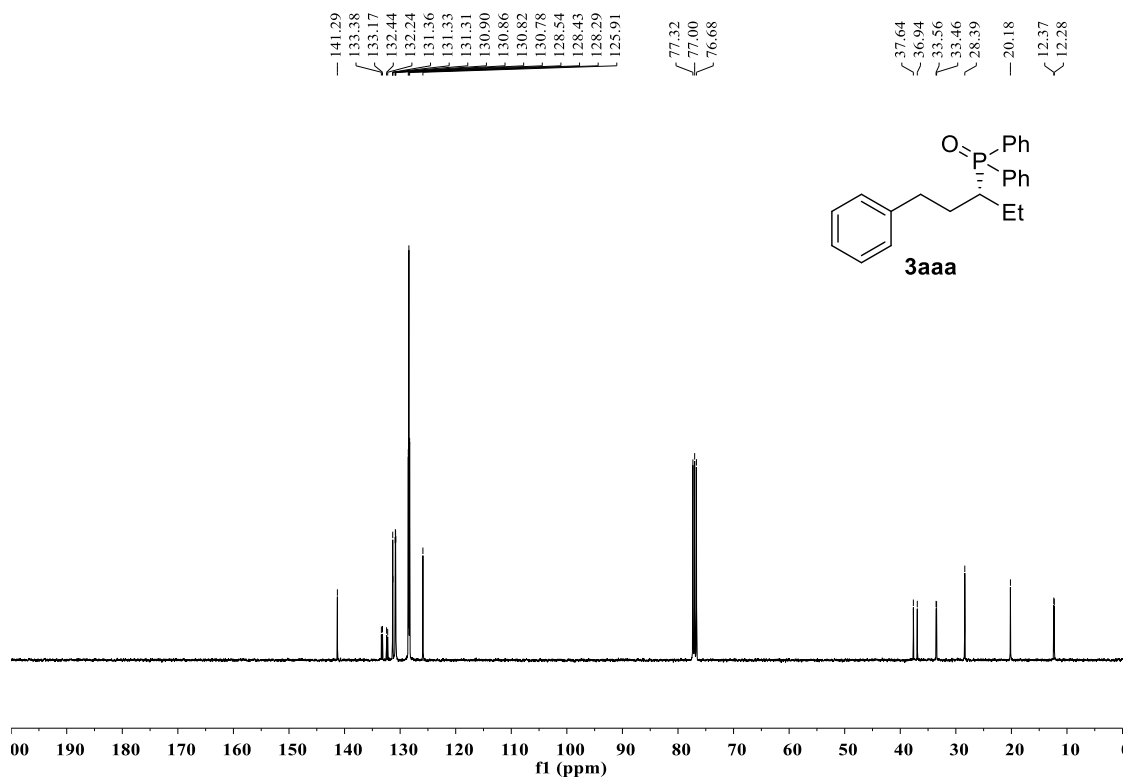

Figure S149. <sup>13</sup>C NMR spectra of **3aaa**.

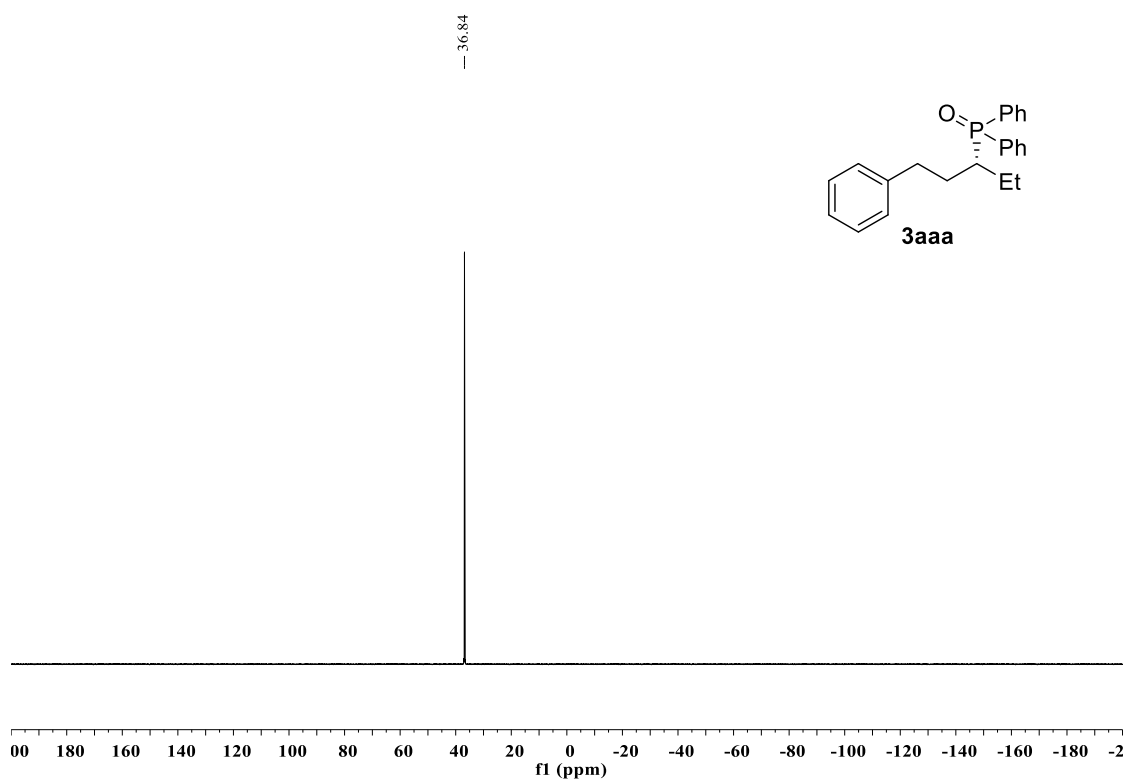

Figure S150. <sup>31</sup>P NMR spectra of **3aaa**.



### 13. HPLC Spectra

Data File D:\DATA\LJ\LJ-3-8\LJ-3-8 2020-10-17 22-06-17\009-72-LJ-2-132-2-RAC.D

Sample Name: LJ-2-132-2-RAC

```

=====
Acq. Operator   : SYSTEM                      Seq. Line :    9
Sample Operator : SYSTEM
Acq. Instrument : L260                      Location  :   72
Injection Date  : 10/18/2020 1:55:34 AM      Inj       :    1
                                           Inj Volume: 5.000 µl
Acq. Method     : D:\Data\LJ\LJ-3-8\LJ-3-8 2020-10-17 22-06-17\PI-95-5-0.5ML-5UL-220NM-254NM-30MIN.M
Last changed    : 10/17/2020 10:04:53 PM by SYSTEM
Analysis Method : D:\Data\LJ\LJ-3-8\LJ-3-8 2020-10-17 22-06-17\PI-95-5-0.5ML-5UL-220NM-254NM-30MIN.M (Sequence Method)
Last changed    : 10/18/2020 3:01:51 AM by SYSTEM
                 (modified after loading)
=====
  
```

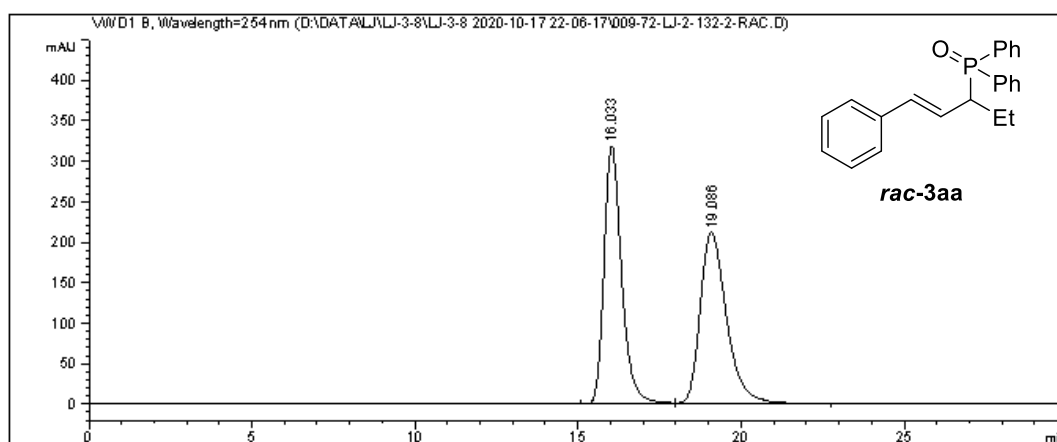

#### Area Percent Report

```

=====
Sorted By      : Signal
Multiplier     : 1.0000
Dilution       : 1.0000
Do not use Multiplier & Dilution Factor with ISTDs
  
```

Signal 1: VWD1 B, Wavelength=254 nm

| Peak # | RetTime [min] | Type | Width [min] | Area [mAU*s] | Height [mAU] | Area %  |
|--------|---------------|------|-------------|--------------|--------------|---------|
| 1      | 16.033        | BV   | 0.5696      | 1.19378e4    | 318.28809    | 50.0390 |
| 2      | 19.086        | VB   | 0.8681      | 1.19192e4    | 211.93512    | 49.9610 |

Totals : 2.38569e4 530.22321

\*\*\* End of Report \*\*\*

Figure S151. HPLC spectra of *rac-3aa*.

Data File D:\Data\LJ\LJ-3-8\LJ-3-8 2020-10-17 22-06-17\008-71-LJ-2-132-2.D  
Sample Name: LJ-2-132-2

```
=====
Acq. Operator   : SYSTEM                      Seq. Line :    8
Sample Operator : SYSTEM
Acq. Instrument : 1260                        Location  :   71
Injection Date  : 10/18/2020 1:24:51 AM      Inj       :    1
                                           Inj Volume: 5.000 µl
Acq. Method     : D:\Data\LJ\LJ-3-8\LJ-3-8 2020-10-17 22-06-17\PI-95-5-0.5ML-5UL-220NM-254NM-30MIN.M
Last changed    : 10/17/2020 10:04:53 PM by SYSTEM
Analysis Method : D:\Data\LJ\LJ-3-8\LJ-3-8 2020-10-17 22-06-17\PI-95-5-0.5ML-5UL-220NM-254NM-30MIN.M (Sequence Method)
Last changed    : 10/18/2020 3:04:16 AM by SYSTEM
                  (modified after loading)
=====
```

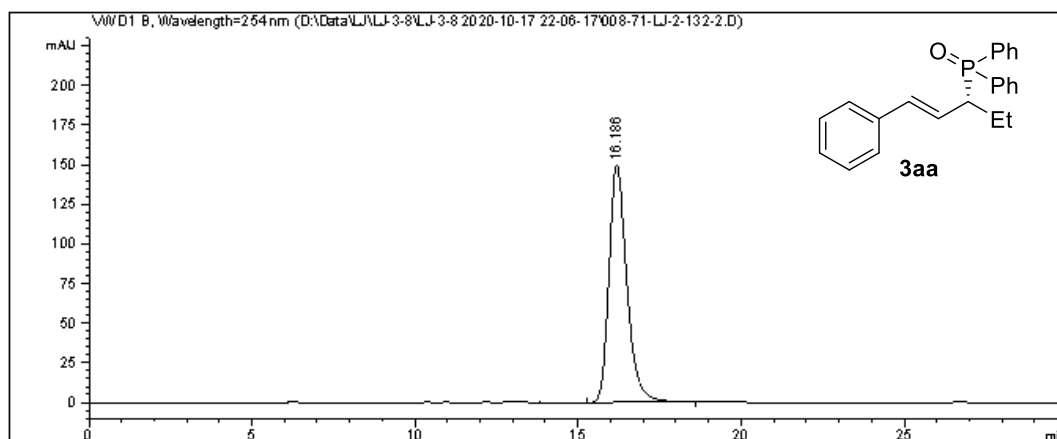

=====  
Area Percent Report  
=====

Sorted By : Signal  
Multiplier : 1.0000  
Dilution : 1.0000  
Do not use Multiplier & Dilution Factor with ISTDs

Signal 1: WWD1 B, Wavelength=254 nm

| Peak # | RetTime [min] | Type | Width [min] | Area [mAU*s] | Height [mAU] | Area %   |
|--------|---------------|------|-------------|--------------|--------------|----------|
| 1      | 16.186        | BB   | 0.5797      | 5700.87891   | 149.88394    | 100.0000 |

Totals : 5700.87891 149.88394

=====  
\*\*\* End of Report \*\*\*

Figure S152. HPLC spectra of 3aa.

Data File D:\Data\LJ\LJ-2-196\LJ-2-196 2020-10-07 08-30-49\006-72-LJ-2-195-RAC.D  
 Sample Name: LJ-2-195-RAC

```

=====
Acq. Operator   : SYSTEM                      Seq. Line :    6
Sample Operator : SYSTEM
Acq. Instrument : 1260                        Location  :   72
Injection Date  : 10/7/2020 10:25:29 AM      Inj       :    1
                                           Inj Volume: 5.000 µl
Acq. Method     : D:\Data\LJ\LJ-2-196\LJ-2-196 2020-10-07 08-30-49\P1-95-5-1.OML-5UL-220NM-
                254NM-30MIN.M
Last changed    : 10/7/2020 10:22:46 AM by SYSTEM
Analysis Method : D:\Data\LJ\LJ-2-196\LJ-2-196 2020-10-07 08-30-49\P1-95-5-1.OML-5UL-220NM-
                254NM-30MIN.M (Sequence Method)
Last changed    : 10/15/2020 8:42:23 AM by SYSTEM
                (modified after loading)
=====
  
```

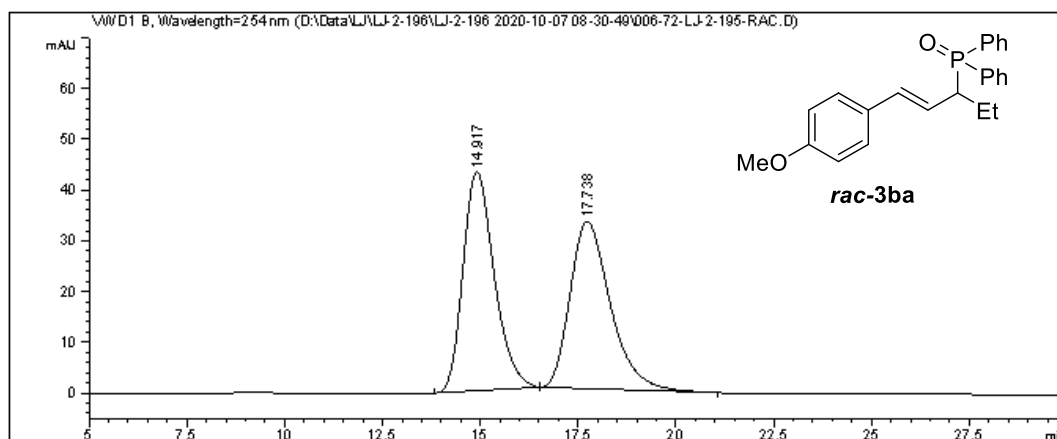

=====  
 Area Percent Report  
 =====

```

Sorted By      :      Signal
Multiplier     :      1.0000
Dilution       :      1.0000
Do not use Multiplier & Dilution Factor with ISTDs
  
```

Signal 1: WWD1 B, Wavelength=254 nm

| Peak # | RetTime [min] | Type | Width [min] | Area [mAU*s] | Height [mAU] | Area %  |
|--------|---------------|------|-------------|--------------|--------------|---------|
| 1      | 14.917        | BB   | 0.8539      | 2394.27393   | 43.11356     | 50.3637 |
| 2      | 17.738        | BB   | 1.1058      | 2359.69214   | 32.85833     | 49.6363 |

Totals :                    4753.96606    75.97188

=====  
 \*\*\* End of Report \*\*\*

**Figure S153.** HPLC spectra of *rac-3ba*.

Data File D:\Data\LJ\LJ-2-196\LJ-2-196 2020-10-07 08-30-49\005-71-LJ-2-195.D  
 Sample Name: LJ-2-195

```

=====
Acq. Operator   : SYSTEM                      Seq. Line :    5
Sample Operator : SYSTEM
Acq. Instrument : 1260                      Location  :   71
Injection Date  : 10/7/2020 9:54:47 AM      Inj       :    1
                                           Inj Volume: 5.000 µl
Acq. Method     : D:\Data\LJ\LJ-2-196\LJ-2-196 2020-10-07 08-30-49\P1-95-5-1.OML-SUL-220NM-
254NM-30MIN.M
Last changed    : 10/7/2020 10:22:46 AM by SYSTEM
                 (modified after loading)
Analysis Method : D:\Data\LJ\LJ-2-196\LJ-2-196 2020-10-07 08-30-49\P1-95-5-1.OML-SUL-220NM-
254NM-30MIN.M (Sequence Method)
Last changed    : 10/15/2020 8:43:53 AM by SYSTEM
                 (modified after loading)
=====
  
```

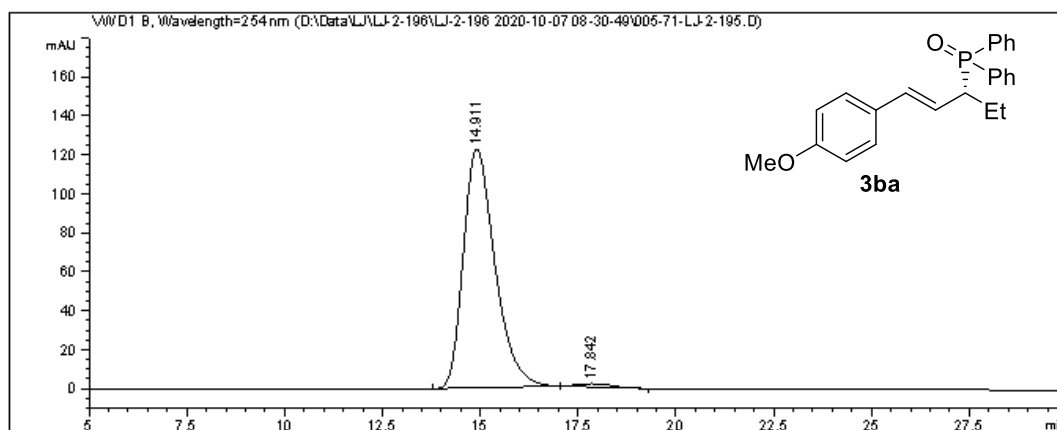

=====  
 Area Percent Report  
 =====

```

Sorted By      :      Signal
Multiplier     :      1.0000
Dilution      :      1.0000
Do not use Multiplier & Dilution Factor with ISTDs
  
```

Signal 1: VWD1 B, Wavelength=254 nm

| Peak # | RetTime [min] | Type | Width [min] | Area [mAU*s] | Height [mAU] | Area %  |
|--------|---------------|------|-------------|--------------|--------------|---------|
| 1      | 14.911        | BB   | 0.8631      | 6900.83252   | 122.52628    | 98.4446 |
| 2      | 17.842        | BB   | 0.9353      | 109.03064    | 1.82416      | 1.5554  |

Totals :                    7009.86316   124.35044

=====  
 \*\*\* End of Report \*\*\*

**Figure S154.** HPLC spectra of **3ba**.

Data File D:\DATA\LJ\LJ-3-16\LJ-3-16 2020-10-28 22-18-03\002-81-LJ-3-16-RAC.D  
 Sample Name: LJ-3-16-RAC

```

=====
Acq. Operator   : SYSTEM                      Seq. Line :    2
Sample Operator : SYSTEM
Acq. Instrument : 1260                      Location  :   81
Injection Date  : 10/28/2020 10:30:07 PM      Inj       :    1
                                           Inj Volume: 5.000 µl
Acq. Method     : D:\Data\LJ\LJ-3-16\LJ-3-16 2020-10-28 22-18-03\P2-85-15-1.OML-5UL-220NM-
                254NM-30MIN.M
Last changed    : 10/28/2020 10:46:29 PM by SYSTEM
                (modified after loading)
Analysis Method : D:\Data\LJ\LJ-3-16\LJ-3-16 2020-10-28 22-18-03\P2-85-15-1.OML-5UL-220NM-
                254NM-30MIN.M (Sequence Method)
Last changed    : 10/28/2020 11:44:57 PM by SYSTEM
                (modified after loading)
=====
  
```

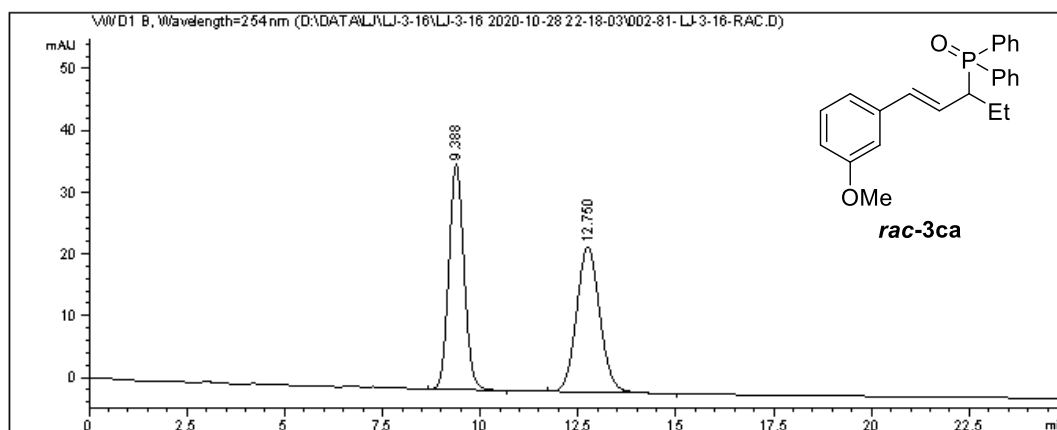

=====  
 Area Percent Report  
 =====

```

Sorted By      :      Signal
Multiplier     :      1.0000
Dilution      :      1.0000
Do not use Multiplier & Dilution Factor with ISTDs
  
```

Signal 1: WWD1 B, Wavelength=254 nm

| Peak # | RetTime [min] | Type | Width [min] | Area [mAU*s] | Height [mAU] | Area %  |
|--------|---------------|------|-------------|--------------|--------------|---------|
| 1      | 9.388         | BB   | 0.4203      | 984.67834    | 36.55403     | 50.2927 |
| 2      | 12.750        | BB   | 0.6473      | 973.21716    | 23.49186     | 49.7073 |

Totals :                    1957.89551    60.04589

=====  
 \*\*\* End of Report \*\*\*

**Figure S155.** HPLC spectra of *rac-3ca*.

Data File D:\Data\LJ\LJ-3-16\LJ-3-16 2020-10-28 22-18-03\003-82-LJ-3-16.D  
 Sample Name: LJ-3-16

```

=====
Acq. Operator   : SYSTEM                      Seq. Line :    3
Sample Operator : SYSTEM
Acq. Instrument : 1260                       Location  :   82
Injection Date  : 10/28/2020 10:55:50 PM     Inj       :    1
                                           Inj Volume: 5.000 µl
Acq. Method     : D:\Data\LJ\LJ-3-16\LJ-3-16 2020-10-28 22-18-03\P2-85-15-1.OML-5UL-220NM-
                254NM-30MIN.M
Last changed    : 10/28/2020 10:46:29 PM by SYSTEM
Analysis Method : D:\Data\LJ\LJ-3-16\LJ-3-16 2020-10-28 22-18-03\P2-85-15-1.OML-5UL-220NM-
                254NM-30MIN.M (Sequence Method)
Last changed    : 10/28/2020 11:47:19 PM by SYSTEM
                (modified after loading)
=====
  
```

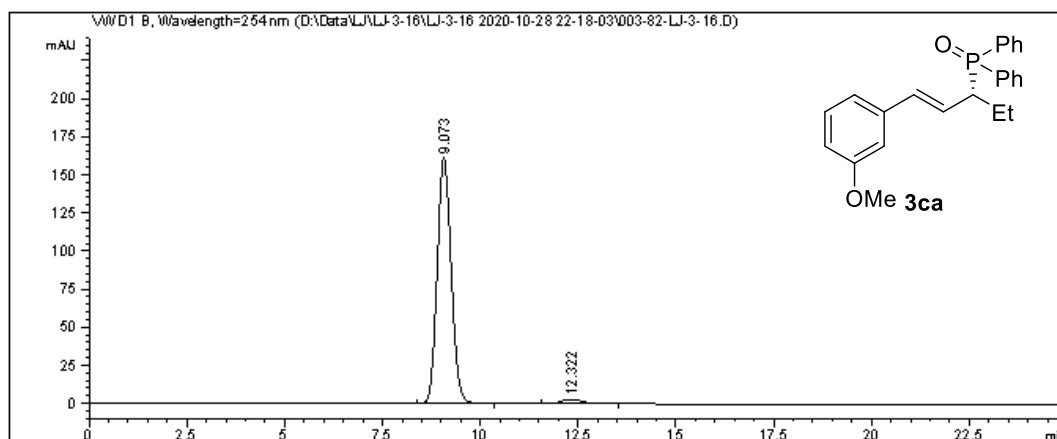

=====  
 Area Percent Report  
 =====

```

Sorted By      :      Signal
Multiplier     :      1.0000
Dilution      :      1.0000
Do not use Multiplier & Dilution Factor with ISTDs
  
```

Signal 1: VWD1 B, Wavelength=254 nm

| Peak # | RetTime [min] | Type | Width [min] | Area [mAU*s] | Height [mAU] | Area %  |
|--------|---------------|------|-------------|--------------|--------------|---------|
| 1      | 9.073         | BB   | 0.3833      | 3971.97510   | 161.29582    | 97.2567 |
| 2      | 12.322        | BB   | 0.5950      | 112.03732    | 2.92413      | 2.7433  |

Totals :                    4084.01242   164.21995

=====  
 \*\*\* End of Report \*\*\*

**Figure S156.** HPLC spectra of **3ca**.

Data File D:\DATA\LJ\LJ-3-2\LJ-3-3 2020-10-15 08-38-47\003-93-LJ-3-2-RAC.D  
 Sample Name: LJ-3-2-RAC

```

=====
Acq. Operator   : SYSTEM                      Seq. Line :    3
Sample Operator : SYSTEM
Acq. Instrument : 1260                       Location  :   93
Injection Date  : 10/15/2020 9:06:11 AM      Inj       :    1
                                           Inj Volume: 5.000 µl
Acq. Method     : D:\Data\LJ\LJ-3-2\LJ-3-3 2020-10-15 08-38-47\PI-85-15-1.OML-SUL-220NM-254NM
                  -30MIN.M
Last changed    : 10/15/2020 8:59:14 AM by SYSTEM
Analysis Method : D:\Data\LJ\LJ-3-2\LJ-3-3 2020-10-15 08-38-47\PI-85-15-1.OML-SUL-220NM-254NM
                  -30MIN.M (Sequence Method)
Last changed    : 10/15/2020 9:31:56 AM by SYSTEM
                  (modified after loading)
Additional Info  : Peak(s) manually integrated
=====
  
```

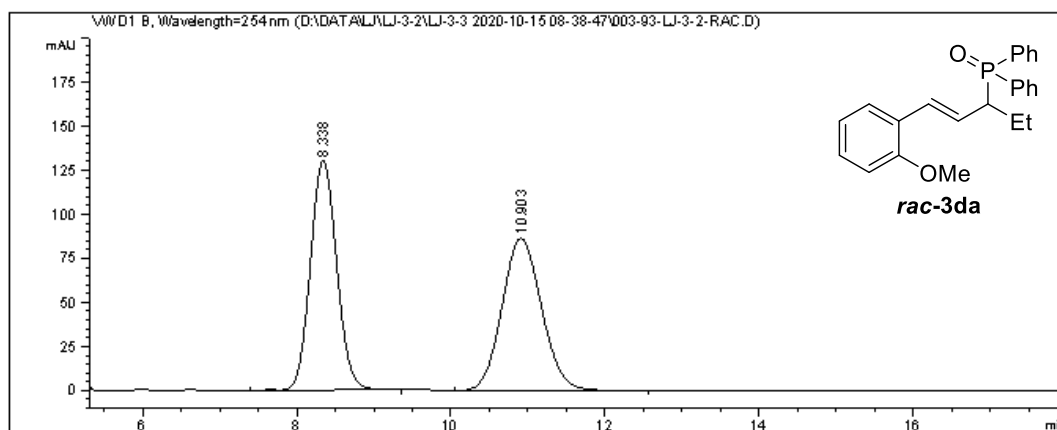

=====  
 Area Percent Report  
 =====

```

Sorted By      :      Signal
Multiplier     :      1.0000
Dilution      :      1.0000
Do not use Multiplier & Dilution Factor with ISTDs
  
```

Signal 1: VWD1 B, Wavelength=254 nm

| Peak # | RetTime [min] | Type | Width [min] | Area [mAU*s] | Height [mAU] | Area %  |
|--------|---------------|------|-------------|--------------|--------------|---------|
| 1      | 8.338         | VB R | 0.3707      | 3081.69141   | 129.95374    | 50.0623 |
| 2      | 10.903        | BB   | 0.5554      | 3074.02612   | 86.34139     | 49.9377 |

Totals :                    6155.71753   216.29513

=====  
 \*\*\* End of Report \*\*\*

**Figure S157.** HPLC spectra of *rac-3da*.

Data File D:\Data\LJ\LJ-3-2\LJ-3-3 2020-10-15 08-38-47\002-92-LJ-3-2.D  
Sample Name: LJ-3-2

```
=====
Acq. Operator   : SYSTEM                      Seq. Line :    2
Sample Operator : SYSTEM
Acq. Instrument : 1260                        Location  :   92
Injection Date  : 10/15/2020 8:45:27 AM      Inj       :    1
                                           Inj Volume: 5.000 µl
Acq. Method     : D:\Data\LJ\LJ-3-2\LJ-3-3 2020-10-15 08-38-47\Pl-85-15-1.OML-5UL-220NM-254NM
                  -30MIN.M
Last changed    : 10/15/2020 8:59:14 AM by SYSTEM
                  (modified after loading)
Analysis Method : D:\Data\LJ\LJ-3-2\LJ-3-3 2020-10-15 08-38-47\Pl-85-15-1.OML-5UL-220NM-254NM
                  -30MIN.M (Sequence Method)
Last changed    : 10/15/2020 9:38:36 AM by SYSTEM
                  (modified after loading)
=====
```

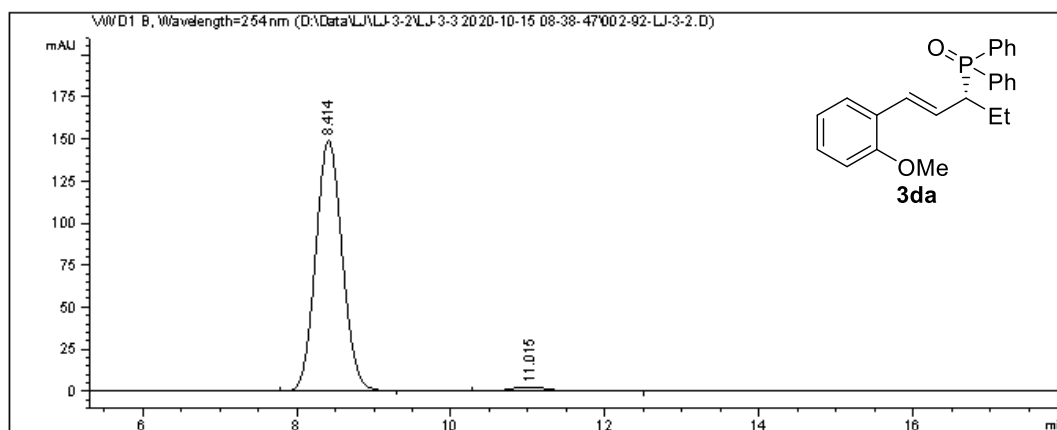

=====  
Area Percent Report  
=====

Sorted By : Signal  
Multiplier : 1.0000  
Dilution : 1.0000  
Do not use Multiplier & Dilution Factor with ISTDs

Signal 1: WWD1 B, Wavelength=254 nm

| Peak # | RetTime [min] | Type | Width [min] | Area [mAU*s] | Height [mAU] | Area %  |
|--------|---------------|------|-------------|--------------|--------------|---------|
| 1      | 8.414         | BB   | 0.3727      | 3553.77881   | 148.78304    | 97.7306 |
| 2      | 11.015        | BB   | 0.5579      | 82.52254     | 2.30399      | 2.2694  |

Totals : 3636.30135 151.08703

=====  
\*\*\* End of Report \*\*\*

Figure S158. HPLC spectra of 3da.



Data File D:\DATA\LJ\LJ-2-196\LJ-2-196 2020-10-07 08-30-49\003-82-LJ-2-196-RAC.D  
 Sample Name: LJ-2-196-RAC

```

=====
Acq. Operator   : SYSTEM                      Seq. Line :    3
Sample Operator : SYSTEM
Acq. Instrument : 1260                      Location  :   82
Injection Date  : 10/7/2020 9:13:11 AM      Inj       :    1
                                           Inj Volume: 5.000 µl
Acq. Method     : D:\Data\LJ\LJ-2-196\LJ-2-196 2020-10-07 08-30-49\P2-80-20-1.OML-5UL-220NM-
                254NM-40MIN.M
Last changed    : 10/7/2020 9:12:02 AM by SYSTEM
Analysis Method : D:\Data\LJ\LJ-2-196\LJ-2-196 2020-10-07 08-30-49\P2-80-20-1.OML-5UL-220NM-
                254NM-40MIN.M (Sequence Method)
Last changed    : 10/7/2020 10:01:24 AM by SYSTEM
                (modified after loading)
=====
  
```

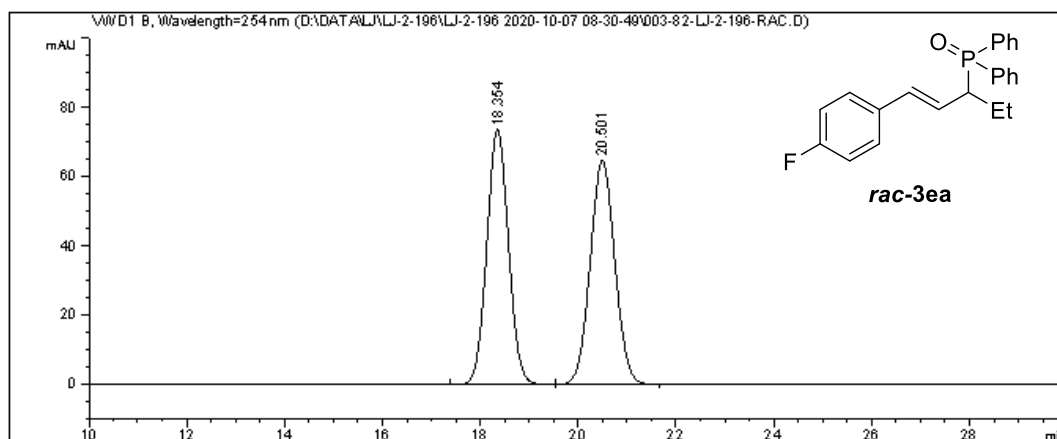

=====  
 Area Percent Report  
 =====

```

Sorted By      :      Signal
Multiplier     :      1.0000
Dilution      :      1.0000
Do not use Multiplier & Dilution Factor with ISTDs
  
```

Signal 1: VWD1 B, Wavelength=254 nm

| Peak # | RetTime [min] | Type | Width [min] | Area [mAU*s] | Height [mAU] | Area %  |
|--------|---------------|------|-------------|--------------|--------------|---------|
| 1      | 18.354        | BB   | 0.4798      | 2258.16870   | 73.62626     | 49.9582 |
| 2      | 20.501        | BB   | 0.5414      | 2261.95190   | 64.77413     | 50.0418 |

Totals :                    4520.12061   138.40039

=====  
 \*\*\* End of Report \*\*\*

Figure S159. HPLC spectra of *rac-3ea*.

Data File D:\Data\LJ\LJ-2-196\LJ-2-196 2020-10-07 08-30-49\002-81-LJ-2-196.D  
 Sample Name: LJ-2-196

```

=====
Acq. Operator   : SYSTEM                      Seq. Line :    2
Sample Operator : SYSTEM
Acq. Instrument : 1260                        Location  :   81
Injection Date  : 10/7/2020 8:42:28 AM        Inj       :    1
                                           Inj Volume: 5.000 µl

Acq. Method     : D:\Data\LJ\LJ-2-196\LJ-2-196 2020-10-07 08-30-49\P2-80-20-1.OML-5UL-220NM-
                254NM-40MIN.M
Last changed    : 10/7/2020 9:12:02 AM by SYSTEM
                (modified after loading)
Analysis Method : D:\Data\LJ\LJ-2-196\LJ-2-196 2020-10-07 08-30-49\P2-80-20-1.OML-5UL-220NM-
                254NM-40MIN.M (Sequence Method)
Last changed    : 10/7/2020 10:03:22 AM by SYSTEM
                (modified after loading)
=====
  
```

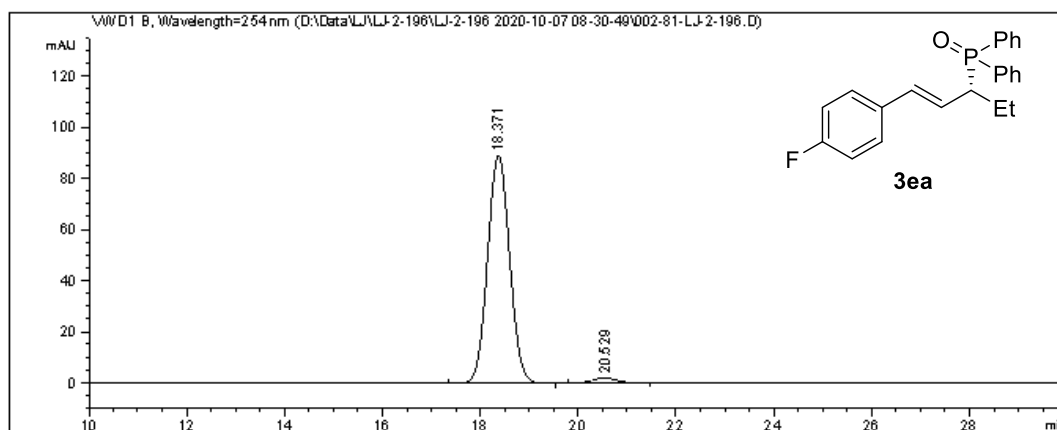

=====  
 Area Percent Report  
 =====

```

Sorted By      :      Signal
Multiplier     :      1.0000
Dilution       :      1.0000
Do not use Multiplier & Dilution Factor with ISTDs
  
```

Signal 1: WWD1 B, Wavelength=254 nm

| Peak # | RetTime [min] | Type | Width [min] | Area [mAU*s] | Height [mAU] | Area %  |
|--------|---------------|------|-------------|--------------|--------------|---------|
| 1      | 18.371        | BB   | 0.4896      | 2777.86963   | 89.13638     | 97.5137 |
| 2      | 20.529        | BB   | 0.5455      | 70.82655     | 2.00804      | 2.4863  |

Totals :                    2848.69618    91.14442

=====  
 \*\*\* End of Report \*\*\*

**Figure S160.** HPLC spectra of **3ea**.

Data File D:\Data\LJ\LJ-3-178-182\LJ-3-178-182 2021-11-30 21-16-46\004-52-LJ-3-178-RAC.D  
 Sample Name: LJ-3-178-RAC

```

=====
Acq. Operator   : SYSTEM                      Seq. Line :    4
Sample Operator : SYSTEM
Acq. Instrument : 1260                      Location  :   52
Injection Date  : 11/30/2021 10:02:15 PM      Inj       :    1
                                           Inj Volume: 5.000 µl
Acq. Method     : D:\Data\LJ\LJ-3-178-182\LJ-3-178-182 2021-11-30 21-16-46\P1-85-15-1.OML-5UL
                  -220NM-254NM-20MIN.M
Last changed    : 11/30/2021 9:15:18 PM by SYSTEM
Analysis Method : D:\Data\LJ\LJ-3-178-182\LJ-3-178-182 2021-11-30 21-16-46\P1-85-15-1.OML-5UL
                  -220NM-254NM-20MIN.M (Sequence Method)
Last changed    : 11/30/2021 10:32:42 PM by SYSTEM
                  (modified after loading)
=====
  
```

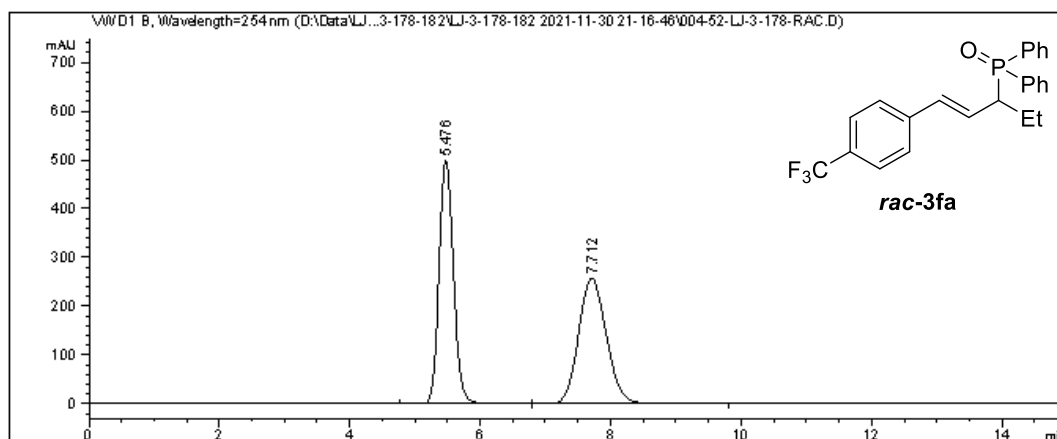

=====  
 Area Percent Report  
 =====

```

Sorted By      :      Signal
Multiplier     :      1.0000
Dilution      :      1.0000
Do not use Multiplier & Dilution Factor with ISTDs
  
```

Signal 1: WWD1 B, Wavelength=254 nm

| Peak # | RetTime [min] | Type | Width [min] | Area [mAU*s] | Height [mAU] | Area %  |
|--------|---------------|------|-------------|--------------|--------------|---------|
| 1      | 5.476         | VB R | 0.2364      | 7623.68555   | 498.66730    | 50.0396 |
| 2      | 7.712         | BB   | 0.4612      | 7611.61133   | 257.26355    | 49.9604 |

Totals :                    1.52353e4    755.93085

=====  
 \*\*\* End of Report \*\*\*

**Figure S161.** HPLC spectra of *rac-3fa*.

Data File D:\Data\LJ\LJ-3-178-182\LJ-3-178-182 2021-11-30 21-16-46\003-51-LJ-3-178.D  
Sample Name: LJ-3-178

```
=====
Acq. Operator   : SYSTEM                      Seq. Line :    3
Sample Operator : SYSTEM
Acq. Instrument : 1260                       Location  :   51
Injection Date  : 11/30/2021 9:41:32 PM      Inj       :    1
                                           Inj Volume: 5.000 µl
Acq. Method     : D:\Data\LJ\LJ-3-178-182\LJ-3-178-182 2021-11-30 21-16-46\P1-85-15-1.OML-5UL
                  -220NM-254NM-20MIN.M
Last changed    : 11/30/2021 9:15:18 PM by SYSTEM
Analysis Method : D:\Data\LJ\LJ-3-178-182\LJ-3-178-182 2021-11-30 21-16-46\P1-85-15-1.OML-5UL
                  -220NM-254NM-20MIN.M (Sequence Method)
Last changed    : 11/30/2021 10:33:53 PM by SYSTEM
                  (modified after loading)
=====
```

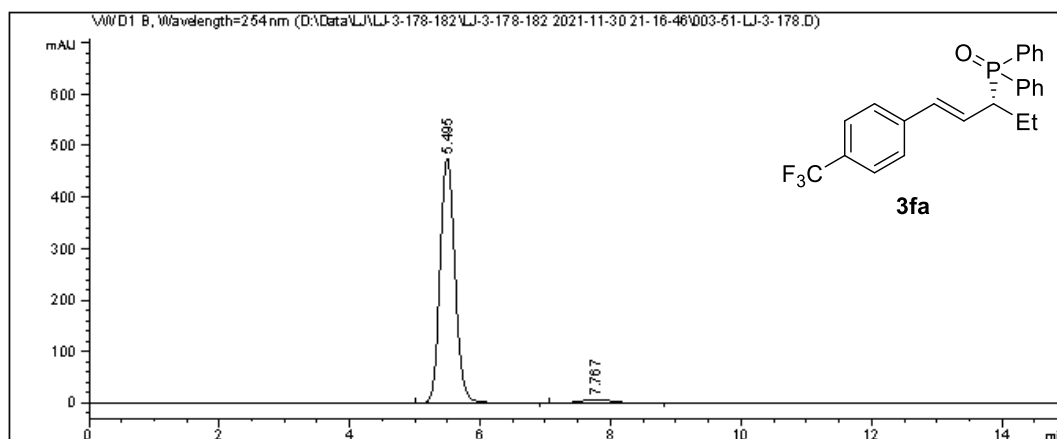

=====  
Area Percent Report  
=====

Sorted By : Signal  
Multiplier : 1.0000  
Dilution : 1.0000  
Do not use Multiplier & Dilution Factor with ISTDs

Signal 1: VWD1 B, Wavelength=254 nm

| Peak # | RetTime [min] | Type | Width [min] | Area [mAU*s] | Height [mAU] | Area %  |
|--------|---------------|------|-------------|--------------|--------------|---------|
| 1      | 5.495         | BB   | 0.2460      | 7504.95313   | 475.97095    | 97.3743 |
| 2      | 7.767         | BB   | 0.5152      | 202.37331    | 6.03594      | 2.6257  |

Totals : 7707.32643 482.00689

=====  
\*\*\* End of Report \*\*\*

Figure S162. HPLC spectra of 3fa.

Data File D:\DATA\LJ\LJ-3-2\LJ-3-3 2020-10-15 08-38-47\006-82-LJ-3-3-RAC.D  
Sample Name: LJ-3-3-RAC

```
=====
Acq. Operator   : SYSTEM                      Seq. Line :    6
Sample Operator : SYSTEM
Acq. Instrument : 1260                        Location  :   82
Injection Date  : 10/15/2020 10:03:30 AM      Inj       :    1
                                           Inj Volume: 5.000 µl
Acq. Method     : D:\Data\LJ\LJ-3-2\LJ-3-3 2020-10-15 08-38-47\PI-80-20-1.OML-5UL-220NM-254NM
                  -30MIN.M
Last changed    : 8/13/2020 11:36:50 PM by SYSTEM
Analysis Method : D:\Data\LJ\LJ-3-2\LJ-3-3 2020-10-15 08-38-47\PI-80-20-1.OML-5UL-220NM-254NM
                  -30MIN.M (Sequence Method)
Last changed    : 10/17/2020 8:58:45 AM by SYSTEM
                  (modified after loading)
Additional Info  : Peak(s) manually integrated
=====
```

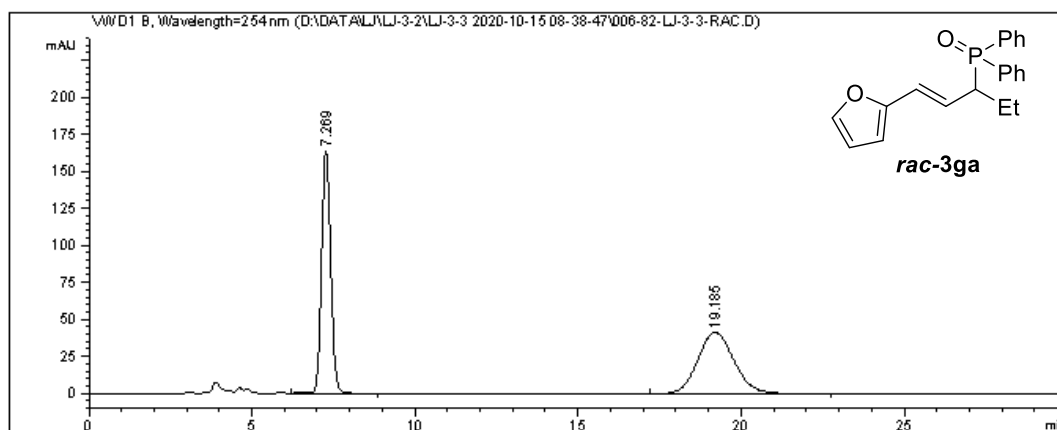

=====  
Area Percent Report  
=====

Sorted By : Signal  
Multiplier : 1.0000  
Dilution : 1.0000  
Do not use Multiplier & Dilution Factor with ISTDs

Signal 1: WWD1 B, Wavelength=254 nm

| Peak # | RetTime [min] | Type | Width [min] | Area [mAU*s] | Height [mAU] | Area %  |
|--------|---------------|------|-------------|--------------|--------------|---------|
| 1      | 7.269         | VB R | 0.3037      | 3194.40552   | 163.67488    | 50.2858 |
| 2      | 19.185        | BB   | 1.1749      | 3158.10034   | 41.07947     | 49.7142 |

Totals : 6352.50586 204.75435

=====  
\*\*\* End of Report \*\*\*

Figure S163. HPLC spectra of *rac-3ga*.

Data File D:\Data\LJ\LJ-3-2\LJ-3-3 2020-10-15 08-38-47\005-81-LJ-3-3.D  
 Sample Name: LJ-3-3

```

=====
Acq. Operator   : SYSTEM                      Seq. Line :    5
Sample Operator : SYSTEM
Acq. Instrument : 1260                        Location  :   81
Injection Date  : 10/15/2020 9:32:46 AM      Inj       :    1
                                           Inj Volume: 5.000 µl
Acq. Method     : D:\Data\LJ\LJ-3-2\LJ-3-3 2020-10-15 08-38-47\PI-80-20-1.OML-5UL-220NM-254NM
                  -30MIN.M
Last changed    : 8/13/2020 11:36:50 PM by SYSTEM
Analysis Method : D:\Data\LJ\LJ-3-2\LJ-3-3 2020-10-15 08-38-47\PI-80-20-1.OML-5UL-220NM-254NM
                  -30MIN.M (Sequence Method)
Last changed    : 10/17/2020 9:00:24 AM by SYSTEM
                  (modified after loading)
=====
  
```

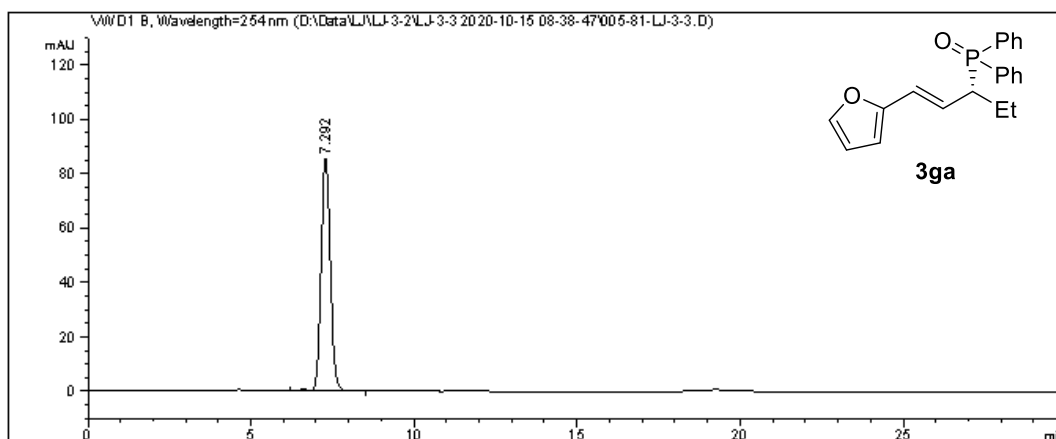

=====  
 Area Percent Report  
 =====

```

Sorted By      :      Signal
Multiplier     :      1.0000
Dilution      :      1.0000
Do not use Multiplier & Dilution Factor with ISTDs
  
```

Signal 1: WWD1 B, Wavelength=254 nm

| Peak # | RetTime [min] | Type | Width [min] | Area [mAU*s] | Height [mAU] | Area %   |
|--------|---------------|------|-------------|--------------|--------------|----------|
| 1      | 7.292         | VB R | 0.3056      | 1691.00940   | 85.92770     | 100.0000 |

Totals :                                    1691.00940    85.92770

=====  
 \*\*\* End of Report \*\*\*

**Figure S164.** HPLC spectra of **3ga**.

Data File D:\Data\LJ\LJ-2-163\LJ-2-163 2020-08-28 07-48-45\005-4-LJ-2-163-2-RAC.D  
 Sample Name: LJ-2-163-2-RAC

```

=====
Acq. Operator   : SYSTEM                      Seq. Line :    5
Sample Operator : SYSTEM
Acq. Instrument : 1260                       Location  :    4
Injection Date  : 8/28/2020 9:22:25 AM      Inj       :    1
                                           Inj Volume: 5.000 µl
Acq. Method     : D:\Data\LJ\LJ-2-163\LJ-2-163 2020-08-28 07-48-45\P2-80-20-1.OML-5UL-220NM-
254NM-40MIN.M
Last changed    : 8/14/2020 1:43:33 AM by SYSTEM
Analysis Method : D:\Data\LJ\LJ-2-163\LJ-2-163 2020-08-28 07-48-45\P2-80-20-1.OML-5UL-220NM-
254NM-40MIN.M (Sequence Method)
Last changed    : 10/15/2020 8:19:44 AM by SYSTEM
                 (modified after loading)
=====
  
```

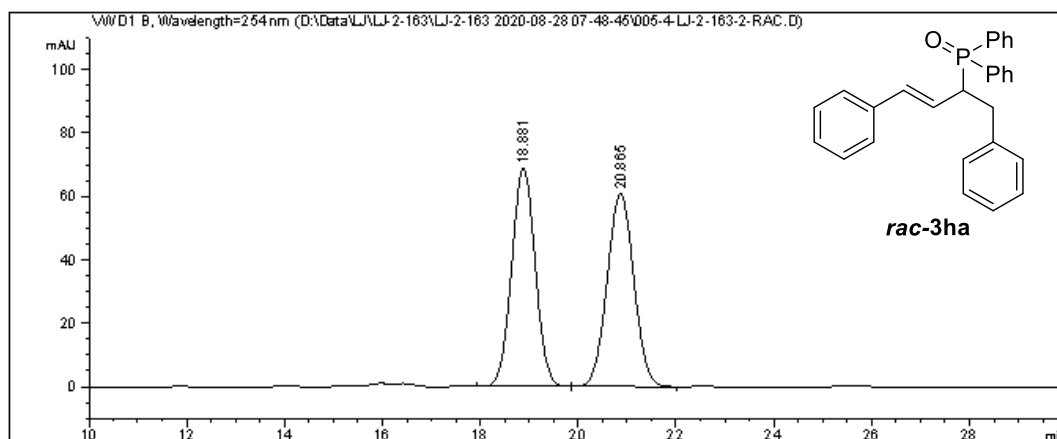

=====  
 Area Percent Report  
 =====

```

Sorted By       :      Signal
Multiplier      :      1.0000
Dilution        :      1.0000
Do not use Multiplier & Dilution Factor with ISTDs
  
```

Signal 1: VWD1 B, Wavelength=254 nm

| Peak # | RetTime [min] | Type | Width [min] | Area [mAU*s] | Height [mAU] | Area %  |
|--------|---------------|------|-------------|--------------|--------------|---------|
| 1      | 18.881        | BB   | 0.5230      | 2308.32568   | 68.87173     | 50.0140 |
| 2      | 20.865        | BB   | 0.5923      | 2307.03101   | 60.85109     | 49.9860 |

Totals :                    4615.35669   129.72282

=====  
 \*\*\* End of Report \*\*\*

**Figure S165.** HPLC spectra of *rac-3ha*.

Data File D:\Data\LJ\LJ-2-163\LJ-2-163 2020-08-28 07-48-45\004-3-LJ-2-163-2.D  
 Sample Name: LJ-2-163-2

```

=====
Acq. Operator   : SYSTEM                      Seq. Line :    4
Sample Operator : SYSTEM
Acq. Instrument : 1260                        Location  :    3
Injection Date  : 8/28/2020 8:41:42 AM       Inj       :    1
                                           Inj Volume: 5.000 µl

Acq. Method     : D:\Data\LJ\LJ-2-163\LJ-2-163 2020-08-28 07-48-45\P2-80-20-1.OML-5UL-220NM-
                254NM-40MIN.M
Last changed    : 8/14/2020 1:43:33 AM by SYSTEM
Analysis Method : D:\Data\LJ\LJ-2-163\LJ-2-163 2020-08-28 07-48-45\P2-80-20-1.OML-5UL-220NM-
                254NM-40MIN.M (Sequence Method)
Last changed    : 10/15/2020 8:22:10 AM by SYSTEM
                (modified after loading)
=====
  
```

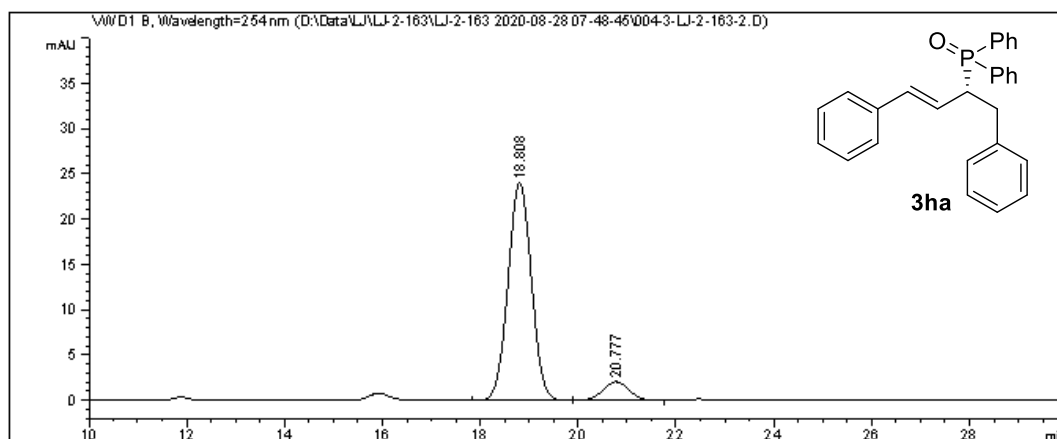

=====  
 Area Percent Report  
 =====

```

Sorted By      :      Signal
Multiplier     :      1.0000
Dilution      :      1.0000
Do not use Multiplier & Dilution Factor with ISTDs
  
```

Signal 1: VWD1 B, Wavelength=254 nm

| Peak # | RetTime [min] | Type | Width [min] | Area [mAU*s] | Height [mAU] | Area %  |
|--------|---------------|------|-------------|--------------|--------------|---------|
| 1      | 18.808        | BB   | 0.5164      | 793.68976    | 23.96498     | 91.3799 |
| 2      | 20.777        | BB   | 0.5755      | 74.87100     | 2.01502      | 8.6201  |

Totals :                                    868.56076    25.98000

=====  
 \*\*\* End of Report \*\*\*

**Figure S166.** HPLC spectra of 3ha.



Data File D:\DATA\LJ\LJ-2-181\LJ-2-181 2020-09-16 23-39-59\002-81-LJ-2-181-RAC.D  
 Sample Name: LJ-2-181-RAC

```

=====
Acq. Operator   : SYSTEM                               Seq. Line :    2
Sample Operator : SYSTEM
Acq. Instrument : 1260                                 Location  :   81
Injection Date  : 9/16/2020 11:53:47 PM              Inj       :    1
                                                    Inj Volume: 5.000 µl

Acq. Method     : D:\Data\LJ\LJ-2-181\LJ-2-181 2020-09-16 23-39-59\P2-80-20-1.OML-5UL-220NM-
                254NM-40MIN.M
Last changed    : 8/14/2020 1:43:33 AM by SYSTEM
Analysis Method : D:\Data\LJ\LJ-2-181\LJ-2-181 2020-09-16 23-39-59\P2-80-20-1.OML-5UL-220NM-
                254NM-40MIN.M (Sequence Method)
Last changed    : 9/17/2020 2:25:37 AM by SYSTEM
                (modified after loading)
=====
  
```

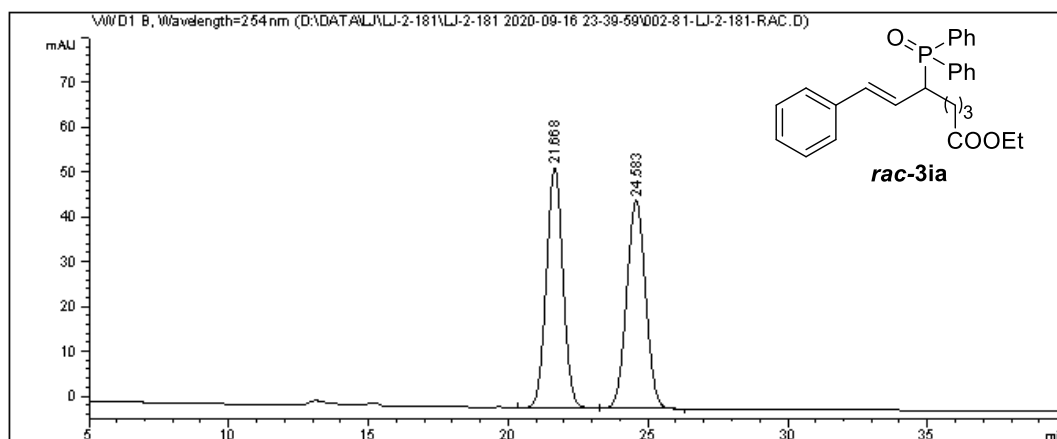

=====  
 Area Percent Report  
 =====

```

Sorted By      :      Signal
Multiplier     :      1.0000
Dilution       :      1.0000
Do not use Multiplier & Dilution Factor with ISTDs
  
```

Signal 1: WWD1 B, Wavelength=254 nm

| Peak # | RetTime [min] | Type | Width [min] | Area [mAU*s] | Height [mAU] | Area %  |
|--------|---------------|------|-------------|--------------|--------------|---------|
| 1      | 21.668        | BB   | 0.6354      | 2206.69604   | 53.47410     | 50.3713 |
| 2      | 24.883        | BB   | 0.7397      | 2174.16772   | 46.48447     | 49.6287 |

Totals :                    4380.86377    99.95857

=====  
 \*\*\* End of Report \*\*\*

**Figure S167.** HPLC spectra of *rac-3ia*.

Data File D:\Data\LJ\LJ-2-181\LJ-2-181 2020-09-16 23-39-59\003-82-LJ-2-181.D  
 Sample Name: LJ-2-181

```

=====
Acq. Operator   : SYSTEM                      Seq. Line :    3
Sample Operator : SYSTEM
Acq. Instrument : 1260                        Location  :   82
Injection Date  : 9/17/2020 12:34:30 AM      Inj       :    1
                                           Inj Volume: 5.000 µl
Acq. Method     : D:\Data\LJ\LJ-2-181\LJ-2-181 2020-09-16 23-39-59\P2-80-20-1.OML-5UL-220NM-
                254NM-40MIN.M
Last changed    : 8/14/2020 1:43:33 AM by SYSTEM
Analysis Method : D:\Data\LJ\LJ-2-181\LJ-2-181 2020-09-16 23-39-59\P2-80-20-1.OML-5UL-220NM-
                254NM-40MIN.M (Sequence Method)
Last changed    : 9/17/2020 2:27:41 AM by SYSTEM
                (modified after loading)
=====
  
```

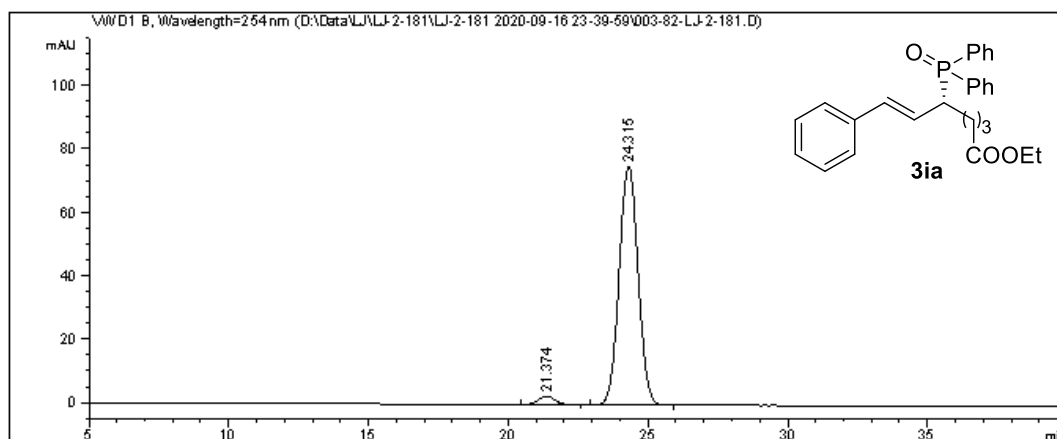

=====  
 Area Percent Report  
 =====

```

Sorted By      :      Signal
Multiplier     :      1.0000
Dilution       :      1.0000
Do not use Multiplier & Dilution Factor with ISTDs
  
```

Signal 1: VWD1 B, Wavelength=254 nm

| Peak # | RetTime [min] | Type | Width [min] | Area [mAU*s] | Height [mAU] | Area %  |
|--------|---------------|------|-------------|--------------|--------------|---------|
| 1      | 21.374        | BB   | 0.6222      | 108.74841    | 2.68690      | 2.9898  |
| 2      | 24.315        | BB   | 0.7281      | 3528.58472   | 75.10789     | 97.0102 |

Totals :                    3637.33313    77.79479

=====  
 \*\*\* End of Report \*\*\*

**Figure S168.** HPLC spectra of **3ia**.

Data File D:\Data\LJ\LJ-2-190\LJ-2-190 2020-09-29 02-34-00\002-81-LJ-2-190-RAC.D  
Sample Name: LJ-2-190-RAC

```

=====
Acq. Operator   : SYSTEM                      Seq. Line :    2
Sample Operator : SYSTEM
Acq. Instrument : 1260                        Location  :   81
Injection Date  : 9/29/2020 2:45:40 AM       Inj       :    1
                                           Inj Volume: 5.000 µl
Acq. Method     : D:\Data\LJ\LJ-2-190\LJ-2-190 2020-09-29 02-34-00\P1-96-4-0.5ML-5UL-220NM-
254NM-40MIN.M
Last changed    : 9/29/2020 2:32:25 AM by SYSTEM
Analysis Method : D:\Data\LJ\LJ-2-190\LJ-2-190 2020-09-29 02-34-00\P1-96-4-0.5ML-5UL-220NM-
254NM-40MIN.M (Sequence Method)
Last changed    : 9/30/2020 12:14:12 AM by SYSTEM
                 (modified after loading)
Additional Info  : Peak(s) manually integrated
=====

```

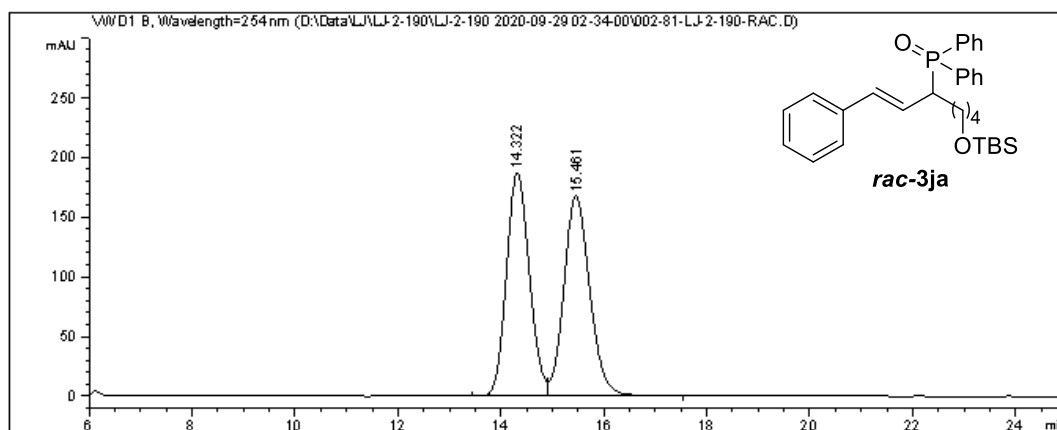

=====  
Area Percent Report  
=====

```

Sorted By      :      Signal
Multiplier     :      1.0000
Dilution       :      1.0000
Do not use Multiplier & Dilution Factor with ISTDs

```

Signal 1: WWD1 B, Wavelength=254 nm

| Peak # | RetTime [min] | Type | Width [min] | Area [mAU*s] | Height [mAU] | Area %  |
|--------|---------------|------|-------------|--------------|--------------|---------|
| 1      | 14.322        | BV   | 0.4858      | 5799.62646   | 186.99374    | 49.6232 |
| 2      | 15.461        | VB   | 0.5417      | 5887.70947   | 167.65469    | 50.3768 |

```
Totals :                      1.16873e4  354.64844
```

=====  
\*\*\* End of Report \*\*\*

**Figure S169.** HPLC spectra of *rac-3ja*.

Data File D:\DATA\LJ\LJ-2-190\LJ-2-190 2020-09-29 02-34-00\003-82-LJ-2-190.D  
Sample Name: LJ-2-190

```
=====
Acq. Operator   : SYSTEM                               Seq. Line :    3
Sample Operator : SYSTEM
Acq. Instrument : 1260                                 Location  :   82
Injection Date  : 9/29/2020 3:26:23 AM                Inj       :    1
                                                    Inj Volume: 5.000 µl
Acq. Method     : D:\Data\LJ\LJ-2-190\LJ-2-190 2020-09-29 02-34-00\P1-96-4-0.5ML-SUL-220NM-
                254NM-40MIN.M
Last changed    : 9/29/2020 3:30:12 AM by SYSTEM
                (modified after loading)
Analysis Method : D:\Data\LJ\LJ-2-190\LJ-2-190 2020-09-29 02-34-00\P1-96-4-0.5ML-SUL-220NM-
                254NM-40MIN.M (Sequence Method)
Last changed    : 9/30/2020 12:12:33 AM by SYSTEM
                (modified after loading)
Additional Info : Peak(s) manually integrated
=====
```

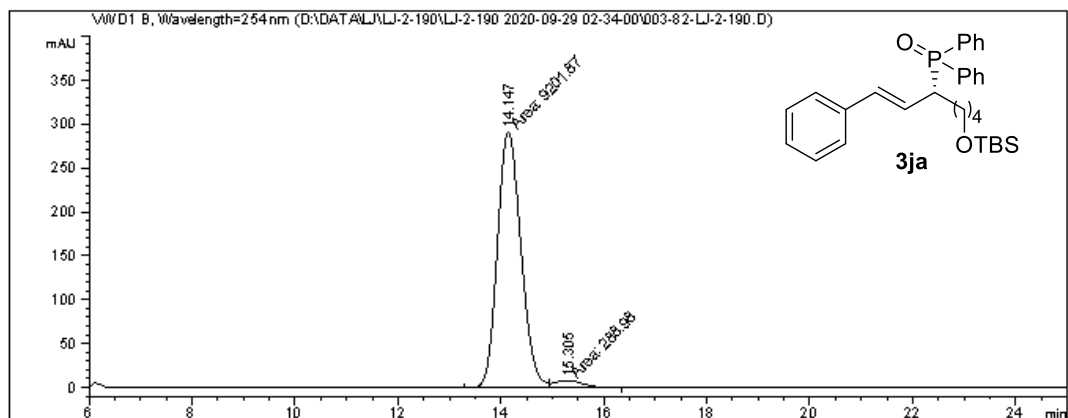

=====  
Area Percent Report  
=====

Sorted By : Signal  
Multiplier : 1.0000  
Dilution : 1.0000  
Do not use Multiplier & Dilution Factor with ISTDs

Signal 1: WVD1 B, Wavelength=254 nm

| Peak # | RetTime [min] | Type | Width [min] | Area [mAU*s] | Height [mAU] | Area %  |
|--------|---------------|------|-------------|--------------|--------------|---------|
| 1      | 14.147        | MF   | 0.5274      | 9201.87402   | 290.79672    | 96.9552 |
| 2      | 15.305        | FM   | 0.5977      | 288.97983    | 8.05860      | 3.0448  |

Totals : 9490.85385 298.85532

=====  
\*\*\* End of Report \*\*\*

1260 9/30/2020 12:12:44 AM SYSTEM

Page 1 of 1

Figure S170. HPLC spectra of 3ja.

Data File D:\DATA\GUAN YUQING\LJ-2-132\LJ-2-132 2020-07-30 12-26-06\084-1001.D  
Sample Name: LJ-2-132-1-RAC

```
=====
Acq. Operator   :                               Seq. Line :   10
Acq. Instrument : Instrument 1                   Location  : Vial 84
Injection Date  : 7/30/2020 4:37:44 PM          Inj       :    1
                                                    Inj Volume: 5.000 µl
Acq. Method     : D:\DATA\GUAN YUQING\LJ-2-132\LJ-2-132 2020-07-30 12-26-06\VWD-0J(1-2)-90-10
                  -1ML-5UL-254NM-20MIN.M
Last changed    : 7/30/2020 12:30:41 PM
Analysis Method : D:\METHOD\GUAN YUQING\LONGJIAO\VWD-0J(1-2)-90-10-1ML-5UL-254NM-10MIN.M
Last changed    : 7/30/2020 9:00:12 PM
                  (modified after loading)
Additional Info  : Peak(s) manually integrated
=====
```

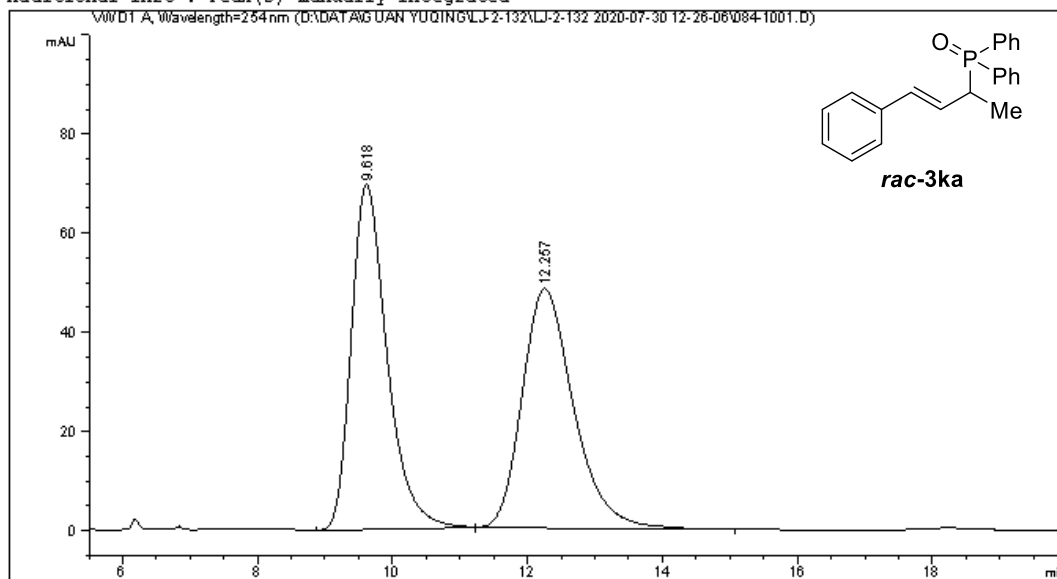

=====  
Area Percent Report  
=====

Sorted By : Signal  
Multiplier : 1.0000  
Dilution : 1.0000  
Use Multiplier & Dilution Factor with ISTDs

Signal 1: VWD1 A, Wavelength=254 nm

| Peak # | RetTime [min] | Type | Width [min] | Area [mAU*s] | Height [mAU] | Area %  |
|--------|---------------|------|-------------|--------------|--------------|---------|
| 1      | 9.618         | BB   | 0.5623      | 2564.64697   | 69.53281     | 50.1132 |
| 2      | 12.257        | BB   | 0.8094      | 2553.05811   | 48.24146     | 49.8868 |

Totals : 5117.70508 117.77426

Instrument 1 7/30/2020 9:00:27 PM

Page 1 of 2

Figure S171. HPLC spectra of *rac-3ka*.

Data File D:\DATA\GUAN YUQING\LJ-2-132\LJ-2-132 2020-07-30 12-26-06\083-0901.D  
 Sample Name: LJ-2-132-1

```

=====
Acq. Operator   :                               Seq. Line :    9
Acq. Instrument : Instrument 1                   Location  : Vial 83
Injection Date  : 7/30/2020 4:16:54 PM          Inj       :    1
                                                Inj Volume: 5.000 µl
Acq. Method     : D:\DATA\GUAN YUQING\LJ-2-132\LJ-2-132 2020-07-30 12-26-06\VWD-0J(1-2)-90-10
                  -1ML-5UL-254NM-20MIN.M
Last changed    : 7/30/2020 12:30:41 PM
Analysis Method : D:\METHOD\GUAN YUQING\LONGJIAO\VWD-0J(1-2)-90-10-1ML-5UL-254NM-10MIN.M
Last changed    : 7/30/2020 9:01:40 PM
                  (modified after loading)
=====
  
```

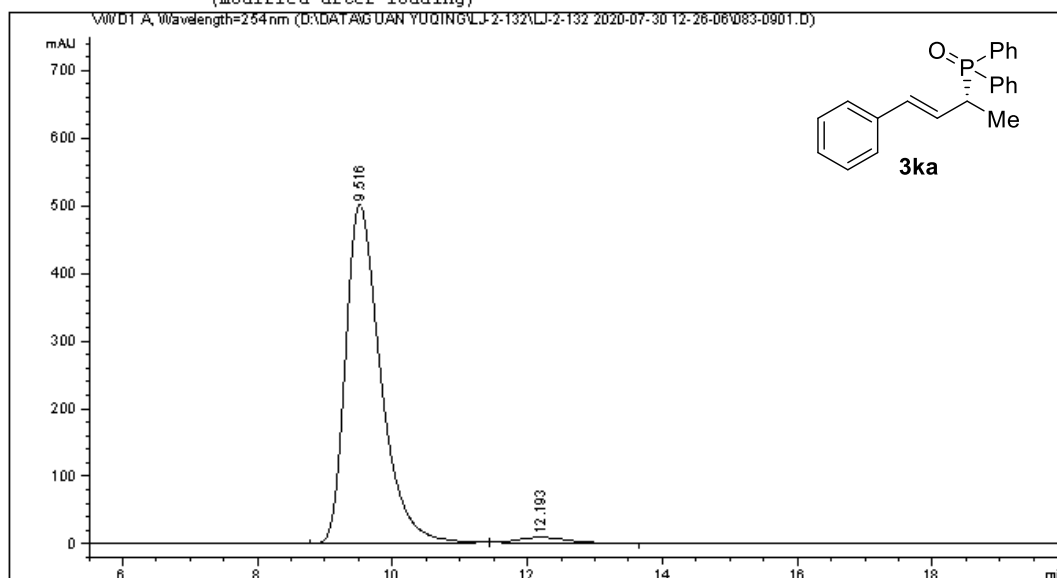

Area Percent Report

```

Sorted By      :      Signal
Multiplier     :      1.0000
Dilution      :      1.0000
Use Multiplier & Dilution Factor with ISTDs
  
```

Signal 1: VWD1 A, Wavelength=254 nm

| Peak # | RetTime [min] | Type | Width [min] | Area [mAU*s] | Height [mAU] | Area %  |
|--------|---------------|------|-------------|--------------|--------------|---------|
| 1      | 9.516         | BB   | 0.5455      | 1.80094e4    | 500.83066    | 97.8336 |
| 2      | 12.193        | BB   | 0.7482      | 398.79898    | 8.16037      | 2.1664  |

Totals : 1.84082e4 508.99102

Instrument 1 7/30/2020 9:02:03 PM

Page 1 of 1

Figure S172. HPLC spectra of 3ka.

Data File D:\DATA\GUAN YUQING\LJ-2-133-4\LJ-2-133-4 2020-07-31 20-17-15\093-0401.D  
 Sample Name: LJ-2-133-4-RAC

```

=====
Acq. Operator   :                               Seq. Line :    4
Acq. Instrument : Instrument 2                   Location  : Vial 93
Injection Date  : 7/31/2020 9:31:29 PM          Inj       :    1
                                                    Inj Volume: 5.000 µl
Acq. Method     : D:\DATA\GUAN YUQING\LJ-2-133-4\LJ-2-133-4 2020-07-31 20-17-15\DAD-0J (1-2)-
                  90-10-1.OML-SUL-ALL-40MIN.M
Last changed    : 7/24/2020 12:08:24 PM
Analysis Method : D:\METHOD\LGY\DAD-0D (1-2)-90-10-1ML-SUL-ALL-20MIN.M
Last changed    : 8/1/2020 5:39:24 PM
                  (modified after loading)
Additional Info  : Peak(s) manually integrated
  
```

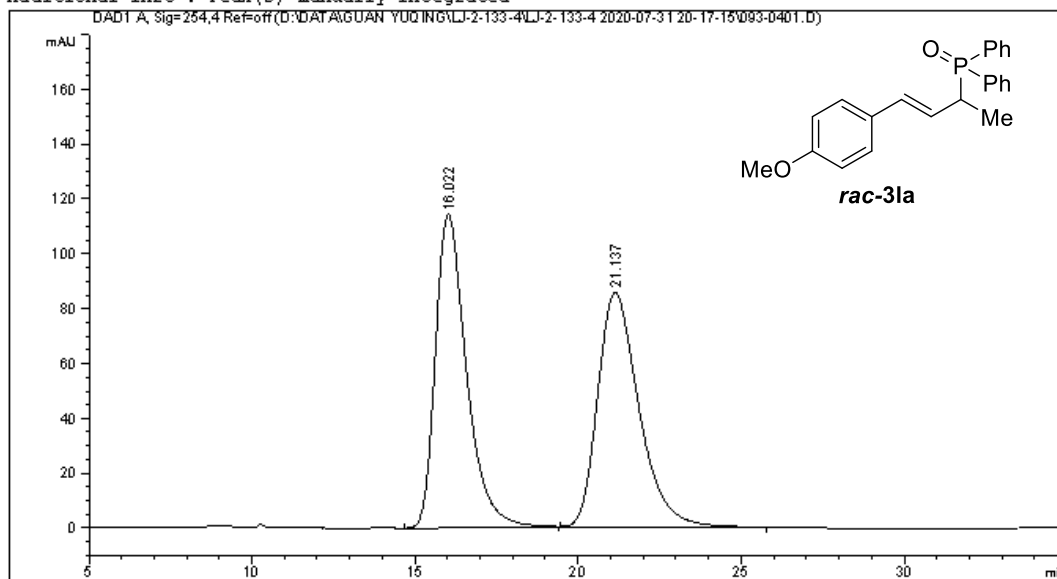

=====  
 Area Percent Report  
 =====

```

Sorted By      :      Signal
Multiplier     :      1.0000
Dilution       :      1.0000
Use Multiplier & Dilution Factor with ISTDs
  
```

Signal 1: DAD1 A, Sig=254,4 Ref=off

| Peak # | RetTime [min] | Type | Width [min] | Area [mAU*s] | Height [mAU] | Area %  |
|--------|---------------|------|-------------|--------------|--------------|---------|
| 1      | 16.022        | BB   | 0.9915      | 7557.32324   | 114.27718    | 50.1070 |
| 2      | 21.137        | BB   | 1.2985      | 7525.04199   | 85.69373     | 49.8930 |

Totals :                                    1.50824e4    199.97092

**Figure S173.** HPLC spectra of *rac-3la*.

Data File D:\DATA\GUAN YUQING\LJ-2-133-4\LJ-2-133-4 2020-07-31 20-17-15\092-0301.D  
Sample Name: LJ-2-133-4

```
=====
Acq. Operator   :                               Seq. Line :    3
Acq. Instrument : Instrument 2                   Location  : Vial 92
Injection Date  : 7/31/2020 8:50:29 PM          Inj       :    1
                                                    Inj Volume: 5.000 µl
Acq. Method     : D:\DATA\GUAN YUQING\LJ-2-133-4\LJ-2-133-4 2020-07-31 20-17-15\DAD-0J (1-2)-
                  90-10-1.OML-SUL-ALL-40MIN.M
Last changed    : 7/24/2020 12:08:24 PM
Analysis Method : D:\METHOD\LG\Y\DAD-0D (1-2)-90-10-1ML-SUL-ALL-20MIN.M
Last changed    : 8/1/2020 5:41:13 PM
                  (modified after loading)
=====
```

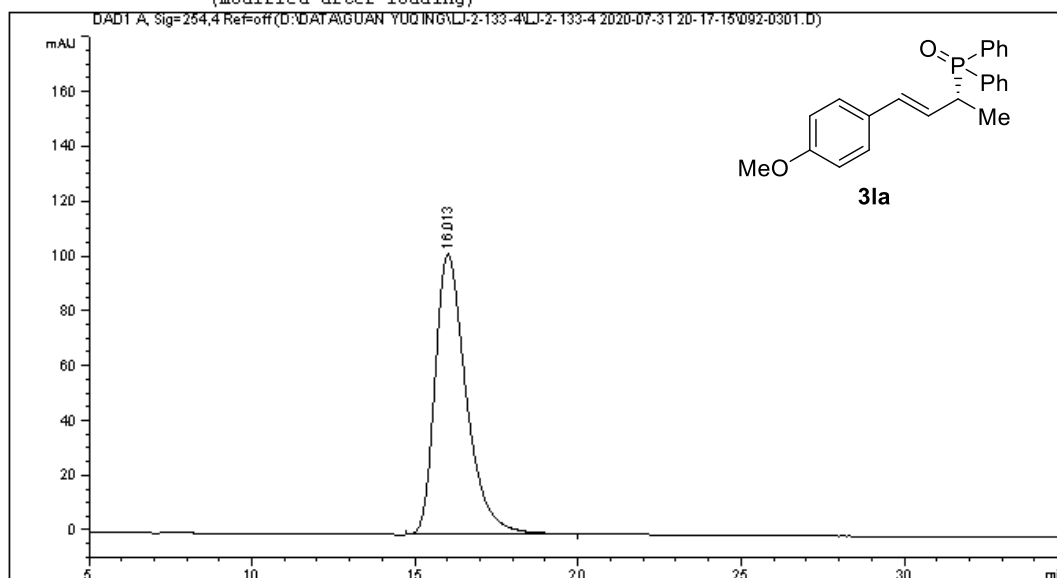

=====  
Area Percent Report  
=====

Sorted By : Signal  
Multiplier : 1.0000  
Dilution : 1.0000  
Use Multiplier & Dilution Factor with ISTDs

Signal 1: DAD1 A, Sig=254,4 Ref=off

| Peak # | RetTime [min] | Type | Width [min] | Area [mAU*s] | Height [mAU] | Area %   |
|--------|---------------|------|-------------|--------------|--------------|----------|
| 1      | 16.013        | BB   | 1.0103      | 6793.58789   | 102.36721    | 100.0000 |

Totals : 6793.58789 102.36721

=====  
\*\*\* End of Report \*\*\*

Instrument 2 8/1/2020 5:41:18 PM

Page 1 of 1

Figure S174. HPLC spectra of 3la.



Data File D:\DATA\GUAN YUQING\LJ-2-129\LJ-2-129 2020-07-24 12-00-59\095-0501.D  
 Sample Name: LJ-2-129-5-RAC

```

=====
Acq. Operator   :                               Seq. Line :    5
Acq. Instrument : Instrument 1                   Location  : Vial 95
Injection Date  : 7/24/2020 2:18:52 PM          Inj       :    1
                                                Inj Volume: 5.000 µl
Acq. Method     : D:\DATA\GUAN YUQING\LJ-2-129\LJ-2-129 2020-07-24 12-00-59\VWD-AS(1-6)-85-15
                  -1ML-5UL-254NM-40MIN.M
Last changed    : 7/24/2020 2:56:42 PM
                  (modified after loading)
Analysis Method : D:\METHOD\LWD\DAD-IC(1-6)-90-10-0.5ML-2UL-ALL-60MIN.M
Last changed    : 7/25/2020 4:14:21 PM
                  (modified after loading)
=====
  
```

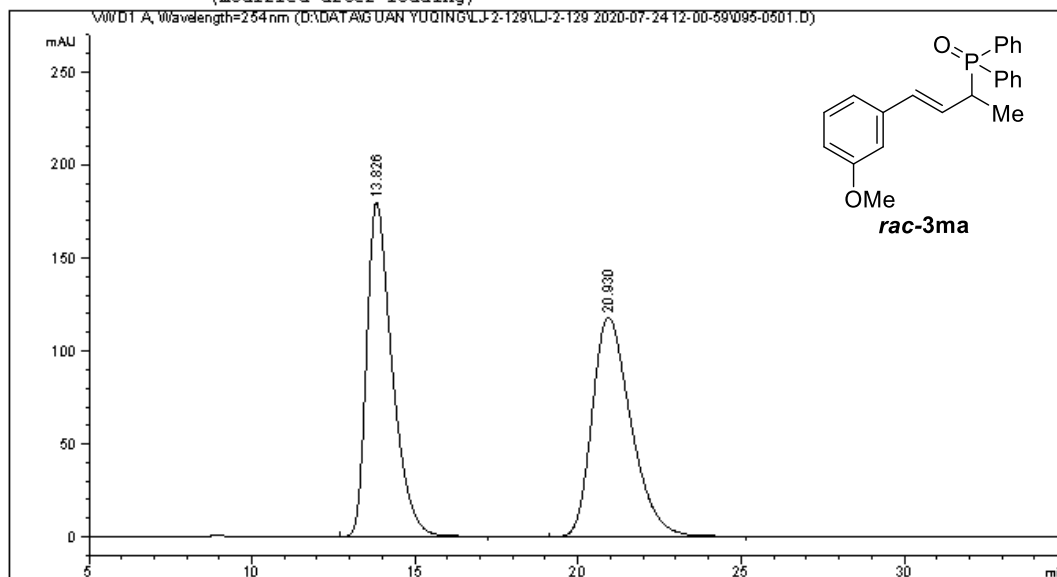

=====  
 Area Percent Report  
 =====

```

Sorted By      :      Signal
Multiplier     :      1.0000
Dilution       :      1.0000
Use Multiplier & Dilution Factor with ISTDs
  
```

Signal 1: VWD1 A, Wavelength=254 nm

| Peak # | RetTime [min] | Type | Width [min] | Area [mAU*s] | Height [mAU] | Area %  |
|--------|---------------|------|-------------|--------------|--------------|---------|
| 1      | 13.826        | BB   | 0.8144      | 9742.17090   | 179.72826    | 50.0212 |
| 2      | 20.930        | BB   | 1.2608      | 9733.93164   | 117.95081    | 49.9788 |

Totals :                                    1.94761e4    297.67906

Instrument 2 7/25/2020 4:14:25 PM

Page 1 of 2

**Figure S175.** HPLC spectra of *rac-3ma*.

Data File D:\DATA\GUAN YUQING\LJ-2-129\LJ-2-129 2020-07-24 12-00-59\094-0401.D  
 Sample Name: LJ-2-129-5

```

=====
Acq. Operator   :                               Seq. Line :    4
Acq. Instrument : Instrument 1                   Location  : Vial 94
Injection Date  : 7/24/2020 1:37:59 PM          Inj       :    1
                                                Inj Volume: 5.000 µl
Acq. Method     : D:\DATA\GUAN YUQING\LJ-2-129\LJ-2-129 2020-07-24 12-00-59\VWD-AS(1-6)-85-15
                  -1ML-5UL-254NM-40MIN.M
Last changed    : 6/27/2019 10:00:11 PM
Analysis Method : D:\METHOD\LWD\DAD-IC(1-6)-90-10-0.5ML-2UL-ALL-60MIN.M
Last changed    : 7/25/2020 4:15:41 PM
                  (modified after loading)
Additional Info : Peak(s) manually integrated
  
```

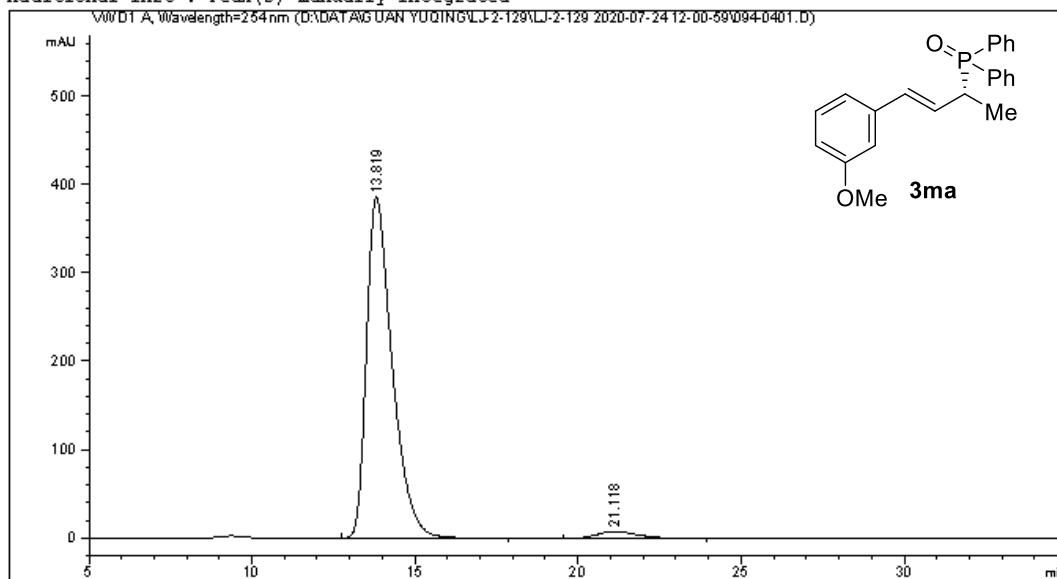

=====  
 Area Percent Report  
 =====

```

Sorted By      :      Signal
Multiplier     :      1.0000
Dilution       :      1.0000
Use Multiplier & Dilution Factor with ISTDs
  
```

Signal 1: VWD1 A, Wavelength=254 nm

| Peak # | RetTime [min] | Type | Width [min] | Area [mAU*s] | Height [mAU] | Area %  |
|--------|---------------|------|-------------|--------------|--------------|---------|
| 1      | 13.819        | BB   | 0.8284      | 2.11235e4    | 386.01627    | 97.0550 |
| 2      | 21.118        | BB   | 1.1325      | 640.96503    | 7.75334      | 2.9450  |

Totals :                                    2.17644e4    393.76960

**Figure S176.** HPLC spectra of 3ma.

Data File D:\DATA\GUAN YUQING\LJ-2-129\LJ-2-129 2020-07-24 12:00-59\093-0301.D  
 Sample Name: LJ-2-129-4-RAC

```

=====
Acq. Operator   :                               Seq. Line :    3
Acq. Instrument : Instrument 1                 Location  : Vial 93
Injection Date  : 7/24/2020 12:57:05 PM      Inj       :    1
                                           Inj Volume: 5.000 µl

Acq. Method    : D:\DATA\GUAN YUQING\LJ-2-129\LJ-2-129 2020-07-24 12:00-59\VWD-AS(1-6)-85-15
                  -1ML-5UL-254NM-40MIN.M
Last changed   : 6/27/2019 10:00:11 PM
Analysis Method : D:\METHOD\LWD\DAD-IC(1-6)-90-10-0.5ML-2UL-ALL-60MIN.M
Last changed   : 7/25/2020 4:11:47 PM
                  (modified after loading)
Additional Info : Peak(s) manually integrated
  
```

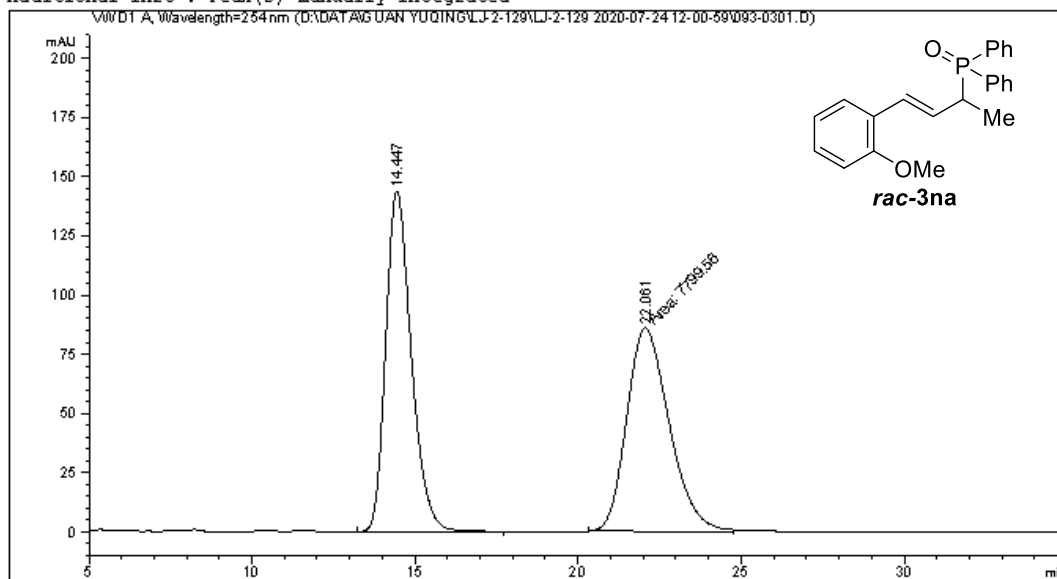

=====  
 Area Percent Report  
 =====

```

Sorted By      :      Signal
Multiplier     :      1.0000
Dilution      :      1.0000
Use Multiplier & Dilution Factor with ISTDs
  
```

Signal 1: VWD1 A, Wavelength=254 nm

| Peak # | RetTime [min] | Type | Width [min] | Area [mAU*s] | Height [mAU] | Area %  |
|--------|---------------|------|-------------|--------------|--------------|---------|
| 1      | 14.447        | BB   | 0.8360      | 7804.19092   | 143.84839    | 50.0148 |
| 2      | 22.061        | MM   | 1.5134      | 7799.55664   | 85.89545     | 49.9852 |

Totals :                                    1.56037e4    229.74384

Instrument 2 7/25/2020 4:11:52 PM

Page 1 of 2

**Figure S177.** HPLC spectra of *rac-3na*.

Data File D:\DATA\GUAN YUQING\LJ-2-129\LJ-2-129 2020-07-24 12-00-59\092-0201.D  
 Sample Name: LJ-2-129-4

```

=====
Acq. Operator   :                               Seq. Line :    2
Acq. Instrument : Instrument 1                   Location  : Vial 92
Injection Date  : 7/24/2020 12:16:14 PM        Inj       :    1
                                                Inj Volume: 5.000 µl

Acq. Method     : D:\DATA\GUAN YUQING\LJ-2-129\LJ-2-129 2020-07-24 12-00-59\VWD-AS(1-6)-85-15
                  -1ML-5UL-254NM-40MIN.M
Last changed    : 6/27/2019 10:00:11 PM
Analysis Method : D:\METHOD\LWD\DAD-IC(1-6)-90-10-0.5ML-2UL-ALL-60MIN.M
Last changed    : 7/25/2020 4:13:03 PM
                  (modified after loading)
  
```

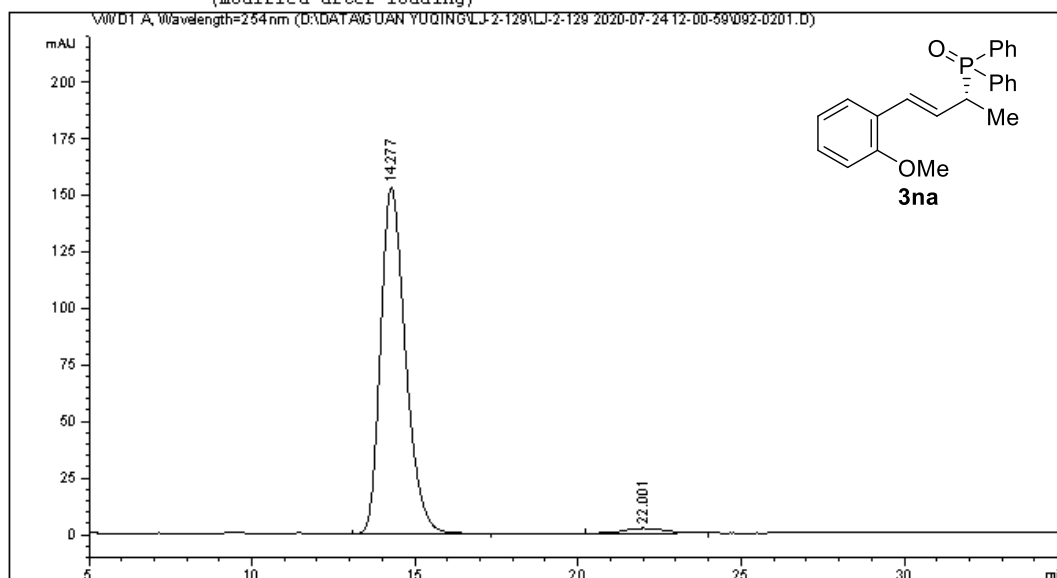

Area Percent Report

```

Sorted By      :      Signal
Multiplier     :      1.0000
Dilution       :      1.0000
Use Multiplier & Dilution Factor with ISTDs
  
```

Signal 1: VWD1 A, Wavelength=254 nm

| Peak # | RetTime [min] | Type | Width [min] | Area [mAU*s] | Height [mAU] | Area %  |
|--------|---------------|------|-------------|--------------|--------------|---------|
| 1      | 14.277        | BB   | 0.8129      | 8097.00342   | 152.87758    | 97.6878 |
| 2      | 22.001        | BB   | 1.0197      | 191.64929    | 2.21440      | 2.3122  |

Totals : 8288.65271 155.09198

Instrument 2 7/25/2020 4:13:10 PM

Page 1 of 1

Figure S178. HPLC spectra of 3na.

Data File D:\DATA\LYH\YXL-1-63-EE-H2O\TK-1-100-3 2020-07-30 12-11-38\082-0601.D  
 Sample Name: LJ-2-132-3-RAC

```

=====
Acq. Operator   :                               Seq. Line :    6
Acq. Instrument : Instrument 2                   Location  : Vial 82
Injection Date  : 7/30/2020 2:27:46 PM          Inj       :    1
                                                Inj Volume: 5.000 µl
Acq. Method     : D:\DATA\LYH\YXL-1-63-EE-H2O\TK-1-100-3 2020-07-30 12-11-38\DAD-AD(1-6)-80-
                  20-1.OML-5UL-ALL-30MIN.M
Last changed    : 7/24/2020 10:44:13 PM
Analysis Method : D:\METHOD\LG\Y\DAD-OD(1-2)-90-10-1ML-5UL-ALL-20MIN.M
Last changed    : 7/30/2020 8:47:21 PM
                  (modified after loading)
Additional Info : Peak(s) manually integrated
  
```

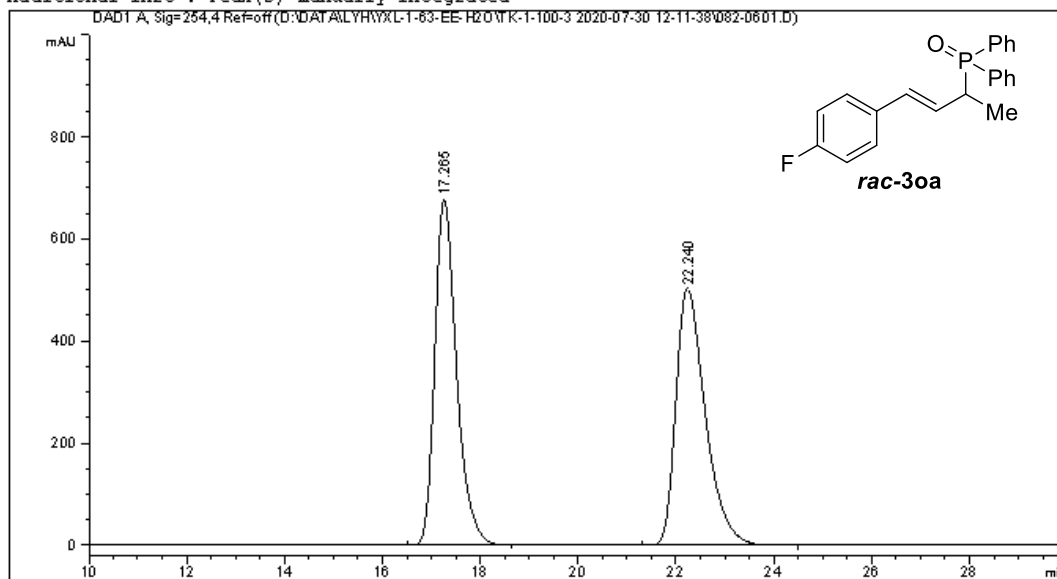

=====  
 Area Percent Report  
 =====

```

Sorted By      :      Signal
Multiplier     :      1.0000
Dilution       :      1.0000
Use Multiplier & Dilution Factor with ISTDs
  
```

Signal 1: DAD1 A, Sig=254,4 Ref=off

| Peak # | RetTime [min] | Type | Width [min] | Area [mAU*s] | Height [mAU] | Area %  |
|--------|---------------|------|-------------|--------------|--------------|---------|
| 1      | 17.265        | BB   | 0.4704      | 2.09296e4    | 677.53448    | 49.8831 |
| 2      | 22.240        | BB   | 0.6373      | 2.10277e4    | 503.44644    | 50.1169 |

Totals :                                    4.19572e4  1180.98093

**Figure S179.** HPLC spectra of *rac-30a*.

Data File D:\DATA\LYH\YXL-1-63-EE-H2O\TK-1-100-3 2020-07-30 12-11-38\081-0501.D  
 Sample Name: LJ-2-132-3

```

=====
Acq. Operator   :                               Seq. Line :    5
Acq. Instrument : Instrument 2                  Location  : Vial 81
Injection Date  : 7/30/2020 1:56:47 PM        Inj       :    1
                                                Inj Volume: 5.000 µl
Acq. Method     : D:\DATA\LYH\YXL-1-63-EE-H2O\TK-1-100-3 2020-07-30 12-11-38\DAD-AD(1-6)-80-
                20-1.OML-5UL-ALL-30MIN.M
Last changed    : 7/24/2020 10:44:13 PM
Analysis Method : D:\METHOD\LG\Y\DAD-OD(1-2)-90-10-1ML-5UL-ALL-20MIN.M
Last changed    : 7/30/2020 8:44:49 PM
                (modified after loading)
  
```

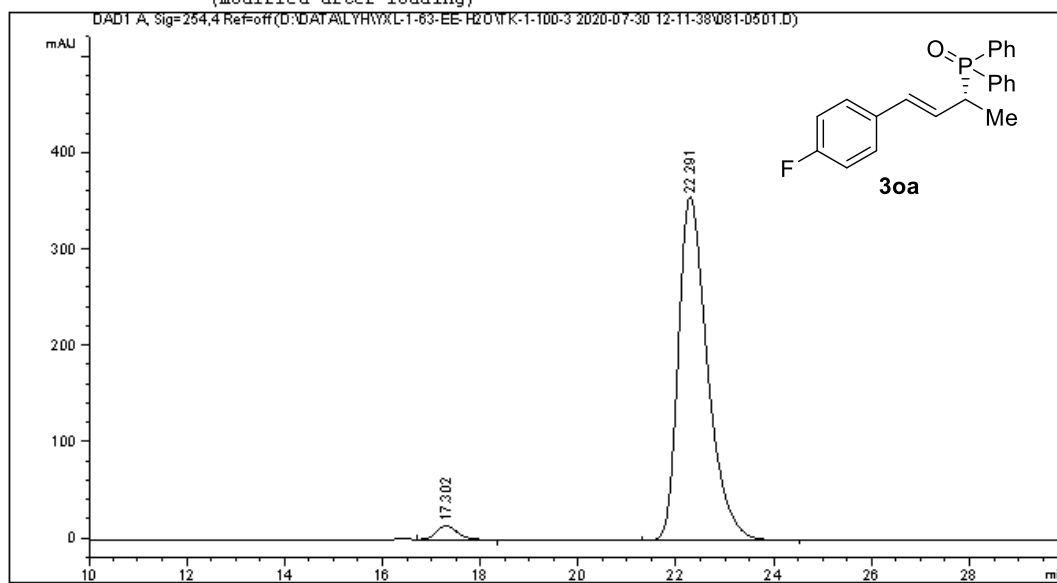

=====  
 Area Percent Report  
 =====

```

Sorted By      :      Signal
Multiplier     :      1.0000
Dilution       :      1.0000
Use Multiplier & Dilution Factor with ISTDs
  
```

Signal 1: DAD1 A, Sig=254,4 Ref=off

| Peak # | RetTime [min] | Type | Width [min] | Area [mAU*s] | Height [mAU] | Area %  |
|--------|---------------|------|-------------|--------------|--------------|---------|
| 1      | 17.302        | BB   | 0.4531      | 434.54437    | 14.43926     | 2.8747  |
| 2      | 22.291        | BB   | 0.6296      | 1.46817e4    | 355.67935    | 97.1253 |

Totals :                    1.51163e4    370.11861

Instrument 2 7/30/2020 8:44:54 PM

Page 1 of 1

**Figure S180.** HPLC spectra of 30a.

Data File D:\Data\ZYF\ZL-XWT-1203\ZL-XWT-1203 2021-12-04 07-59-25\007-51-LJ-3-188-RAC.D  
 Sample Name: LJ-3-188-RAC

```

=====
Acq. Operator   : SYSTEM                      Seq. Line :    7
Sample Operator : SYSTEM
Acq. Instrument : 1260                       Location  :   51
Injection Date  : 12/4/2021 9:50:44 AM      Inj       :    1
                                           Inj Volume: 5.000 µl

Acq. Method     : D:\Data\ZYF\ZL-XWT-1203\ZL-XWT-1203 2021-12-04 07-59-25\P2-85-15-1.0ML-5UL-
                220NM-254NM-20MIN.M
Last changed    : 9/11/2020 5:47:12 AM by SYSTEM
Analysis Method : D:\Data\ZYF\ZL-XWT-1203\ZL-XWT-1203 2021-12-04 07-59-25\P2-85-15-1.0ML-5UL-
                220NM-254NM-20MIN.M (Sequence Method)
Last changed    : 12/4/2021 9:35:23 PM by SYSTEM
                (modified after loading)
Additional Info : Peak(s) manually integrated
=====
  
```

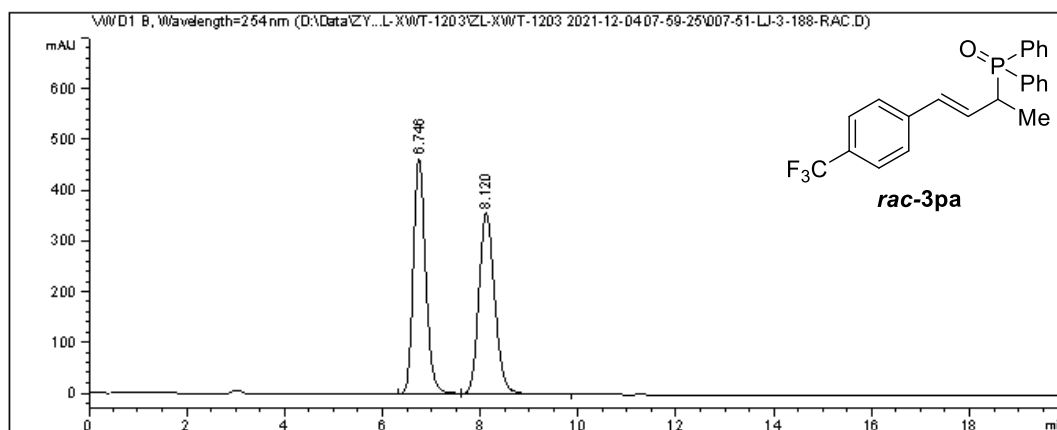

=====  
 Area Percent Report  
 =====

```

Sorted By       :      Signal
Multiplier      :      1.0000
Dilution        :      1.0000
Do not use Multiplier & Dilution Factor with ISTDs
  
```

Signal 1: WWD1 B, Wavelength=254 nm

| Peak # | RetTime [min] | Type | Width [min] | Area [mAU*s] | Height [mAU] | Area %  |
|--------|---------------|------|-------------|--------------|--------------|---------|
| 1      | 6.746         | BV   | 0.2683      | 8046.23926   | 464.07693    | 49.9377 |
| 2      | 8.120         | VB   | 0.3521      | 8066.31104   | 356.29480    | 50.0623 |

Totals :                    1.61126e4    820.37173

=====  
 \*\*\* End of Report \*\*\*

**Figure S181.** HPLC spectra of *rac-3pa*.

Data File D:\Data\ZYF\ZL-XWT-1203\ZL-XWT-1203 2021-12-04 07-59-25\006-52-LJ-3-188.D  
 Sample Name: LJ-3-188

```

=====
Acq. Operator   : SYSTEM                      Seq. Line :    6
Sample Operator : SYSTEM
Acq. Instrument : 1260                       Location  :   52
Injection Date  : 12/4/2021 9:30:03 AM      Inj       :    1
                                           Inj Volume: 5.000 µl

Acq. Method     : D:\Data\ZYF\ZL-XWT-1203\ZL-XWT-1203 2021-12-04 07-59-25\P2-85-15-1.0ML-5UL-
                220NM-254NM-20MIN.M
Last changed    : 9/11/2020 5:47:12 AM by SYSTEM
Analysis Method : D:\Data\ZYF\ZL-XWT-1203\ZL-XWT-1203 2021-12-04 07-59-25\P2-85-15-1.0ML-5UL-
                220NM-254NM-20MIN.M (Sequence Method)
Last changed    : 12/4/2021 9:37:57 PM by SYSTEM
                (modified after loading)
=====
  
```

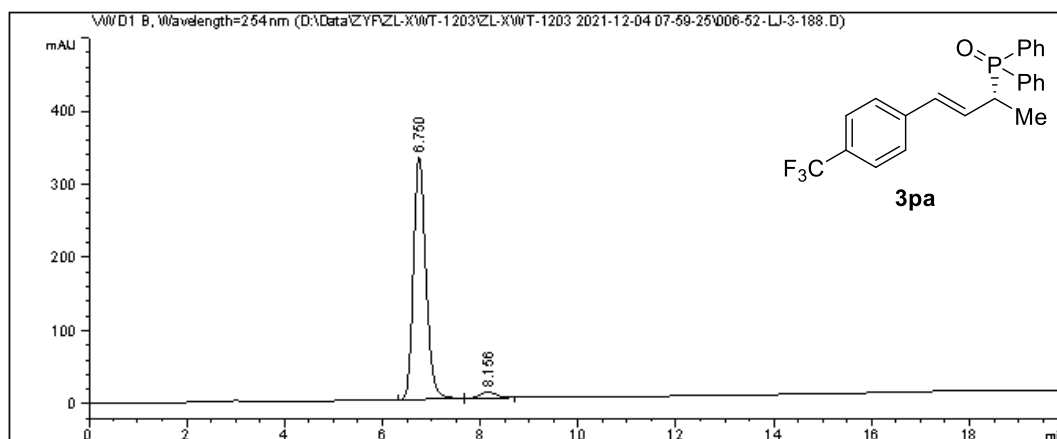

=====  
 Area Percent Report  
 =====

```

Sorted By      :      Signal
Multiplier     :      1.0000
Dilution       :      1.0000
Do not use Multiplier & Dilution Factor with ISTDs
  
```

Signal 1: VWD1 B, Wavelength=254 nm

| Peak # | RetTime [min] | Type | Width [min] | Area [mAU*s] | Height [mAU] | Area %  |
|--------|---------------|------|-------------|--------------|--------------|---------|
| 1      | 6.750         | BV   | 0.2711      | 5823.78467   | 331.26373    | 96.7432 |
| 2      | 8.156         | VB   | 0.3594      | 196.05597    | 8.42705      | 3.2568  |

Totals :                    6019.84064   339.69078

=====  
 \*\*\* End of Report \*\*\*

**Figure S182.** HPLC spectra of 3pa.



Data File D:\DATA\GUAN YUQING\LJ-2-132\LJ-2-132 2020-07-30 12-26-06\093-0301.D  
 Sample Name: LJ-2-132-4-RAC

```

=====
Acq. Operator   :                               Seq. Line :    3
Acq. Instrument : Instrument 1                  Location  : Vial 93
Injection Date  : 7/30/2020 1:31:28 PM        Inj       :    1
                                           Inj Volume: 5.000 µl

Acq. Method     : D:\DATA\GUAN YUQING\LJ-2-132\LJ-2-132 2020-07-30 12-26-06\VWD-AS(1-6)-80-20
                  -1ML-5UL-254NM-40MIN.M
Last changed    : 7/28/2020 6:04:24 PM
Analysis Method : D:\METHOD\GUAN YUQING\LONGJIAO\VWD-0J(1-2)-90-10-1ML-5UL-254NM-10MIN.M
Last changed    : 7/30/2020 9:04:38 PM
                  (modified after loading)
Additional Info : Peak(s) manually integrated
  
```

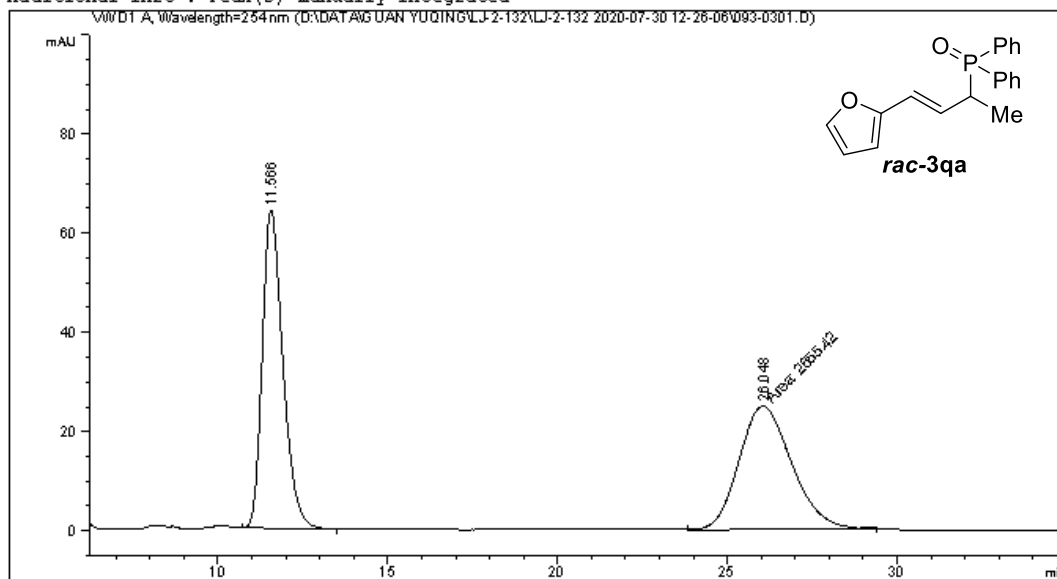

=====  
 Area Percent Report  
 =====

```

Sorted By      :      Signal
Multiplier     :      1.0000
Dilution       :      1.0000
Use Multiplier & Dilution Factor with ISTDs
  
```

Signal 1: VWD1 A, Wavelength=254 nm

| Peak # | RetTime [min] | Type | Width [min] | Area [mAU*s] | Height [mAU] | Area %  |
|--------|---------------|------|-------------|--------------|--------------|---------|
| 1      | 11.566        | BB   | 0.6449      | 2703.24878   | 64.11257     | 50.4462 |
| 2      | 26.048        | MM   | 1.7823      | 2655.42310   | 24.83125     | 49.5538 |

Totals :                                    5358.67188    88.94382

**Figure S183.** HPLC spectra of *rac-3qa*.

Data File D:\DATA\GUAN YUQING\LJ-2-132\LJ-2-132 2020-07-30 12-26-06\092-0201.D  
 Sample Name: LJ-2-132-4

```

=====
Acq. Operator   :                               Seq. Line :    2
Acq. Instrument : Instrument 1                   Location  : Vial 92
Injection Date  : 7/30/2020 12:50:37 PM        Inj       :    1
                                                Inj Volume: 5.000 µl

Acq. Method     : D:\DATA\GUAN YUQING\LJ-2-132\LJ-2-132 2020-07-30 12-26-06\VWD-AS(1-6)-80-20
                  -1ML-5UL-254NM-40MIN.M
Last changed    : 7/28/2020 6:04:24 PM
Analysis Method : D:\METHOD\GUAN YUQING\LONGJIAO\VWD-0J(1-2)-90-10-1ML-5UL-254NM-10MIN.M
Last changed    : 7/30/2020 9:06:19 PM
                  (modified after loading)
Additional Info : Peak(s) manually integrated
  
```

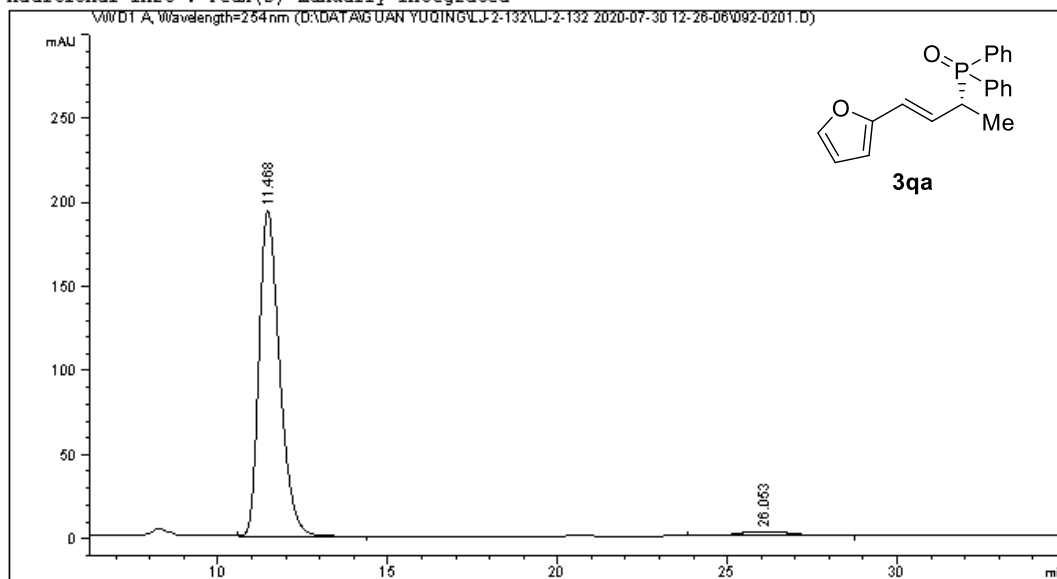

=====  
 Area Percent Report  
 =====

```

Sorted By      :      Signal
Multiplier     :      1.0000
Dilution       :      1.0000
Use Multiplier & Dilution Factor with ISTDs
  
```

Signal 1: VWD1 A, Wavelength=254 nm

| Peak # | RetTime [min] | Type | Width [min] | Area [mAU*s] | Height [mAU] | Area %  |
|--------|---------------|------|-------------|--------------|--------------|---------|
| 1      | 11.468        | BB   | 0.6433      | 8141.77295   | 193.73189    | 96.4885 |
| 2      | 26.053        | BB   | 1.2660      | 296.30133    | 2.75892      | 3.5115  |

Totals :                                    8438.07428   196.49080

Instrument 1 7/30/2020 9:06:44 PM

Page 1 of 2

**Figure S184.** HPLC spectra of 3qa.

Data File D:\DATA\LJ\LJ-2-163\LJ-2-163 2020-08-28 07-48-45\003-2-LJ-2-163-1-RAC.D  
 Sample Name: LJ-2-163-1-RAC

```

=====
Acq. Operator   : SYSTEM                      Seq. Line :    3
Sample Operator : SYSTEM
Acq. Instrument : 1260                        Location  :    2
Injection Date  : 8/28/2020 8:20:55 AM       Inj       :    1
                                           Inj Volume: 5.000 µl
Acq. Method     : D:\Data\LJ\LJ-2-163\LJ-2-163 2020-08-28 07-48-45\P2-80-20-1.OML-5UL-220NM-
                254NM-20MIN.M
Last changed    : 8/23/2020 2:24:42 AM by SYSTEM
Analysis Method : D:\Data\LJ\LJ-2-163\LJ-2-163 2020-08-28 07-48-45\P2-80-20-1.OML-5UL-220NM-
                254NM-20MIN.M (Sequence Method)
Last changed    : 8/28/2020 8:57:04 AM by SYSTEM
                (modified after loading)
=====
  
```

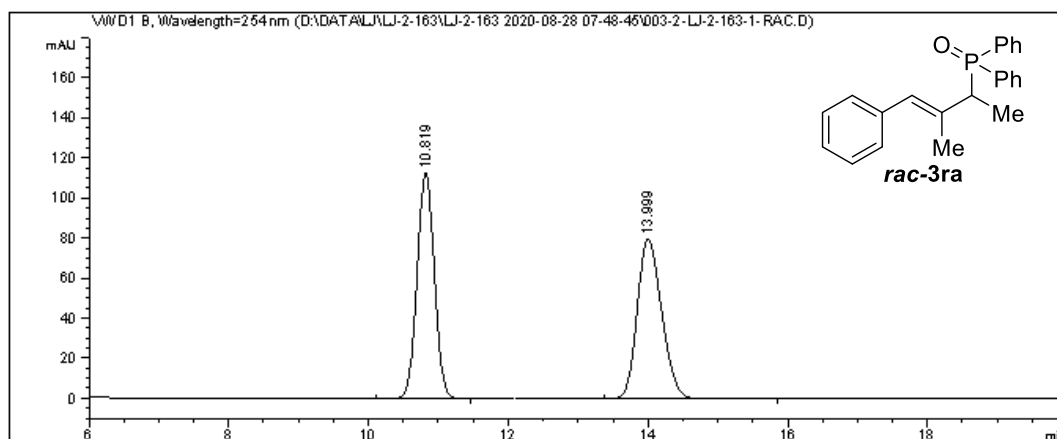

=====  
 Area Percent Report  
 =====

```

Sorted By      :      Signal
Multiplier     :      1.0000
Dilution       :      1.0000
Do not use Multiplier & Dilution Factor with ISTDs
  
```

Signal 1: VWD1 B, Wavelength=254 nm

| Peak # | RetTime [min] | Type | Width [min] | Area [mAU*s] | Height [mAU] | Area %  |
|--------|---------------|------|-------------|--------------|--------------|---------|
| 1      | 10.819        | BB   | 0.2660      | 1935.23633   | 112.87365    | 49.9959 |
| 2      | 13.999        | BB   | 0.3787      | 1935.55420   | 79.86952     | 50.0041 |

Totals :                                    3870.79053   192.74317

=====  
 \*\*\* End of Report \*\*\*

**Figure S185.** HPLC spectra of *rac-3ra*.

Data File D:\Data\LJ\LJ-2-163\LJ-2-163 2020-08-28 07-48-45\002-1-LJ-2-163-1.D  
 Sample Name: LJ-2-163-1

```

=====
Acq. Operator   : SYSTEM                      Seq. Line :    2
Sample Operator : SYSTEM
Acq. Instrument : 1260                      Location  :    1
Injection Date  : 8/28/2020 8:00:11 AM      Inj       :    1
                                           Inj Volume: 5.000 µl
Acq. Method     : D:\Data\LJ\LJ-2-163\LJ-2-163 2020-08-28 07-48-45\P2-80-20-1.OML-5UL-220NM-
                254NM-20MIN.M
Last changed    : 8/23/2020 2:24:42 AM by SYSTEM
Analysis Method : D:\Data\LJ\LJ-2-163\LJ-2-163 2020-08-28 07-48-45\P2-80-20-1.OML-5UL-220NM-
                254NM-20MIN.M (Sequence Method)
Last changed    : 8/28/2020 8:59:42 AM by SYSTEM
                (modified after loading)
=====
  
```

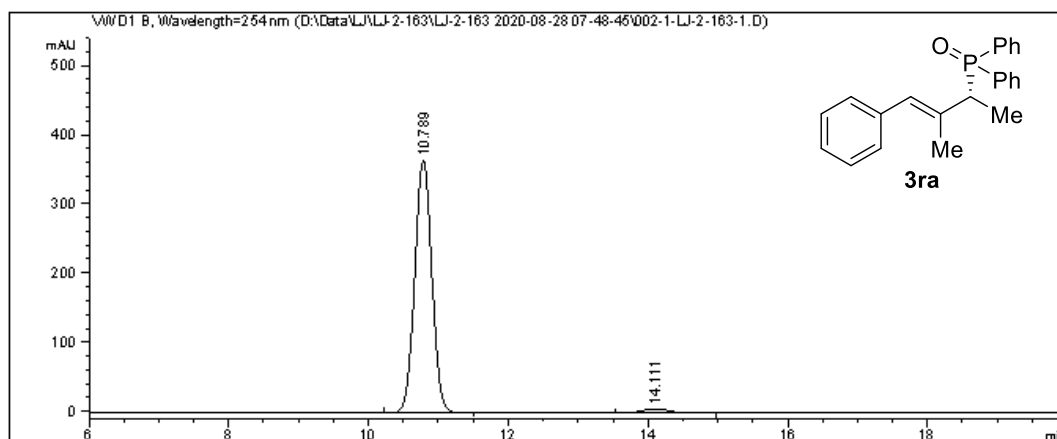

=====  
 Area Percent Report  
 =====

```

Sorted By      :      Signal
Multiplier     :      1.0000
Dilution      :      1.0000
Do not use Multiplier & Dilution Factor with ISTDs
  
```

Signal 1: VWD1 B, Wavelength=254 nm

| Peak # | RetTime [min] | Type | Width [min] | Area [mAU*s] | Height [mAU] | Area %  |
|--------|---------------|------|-------------|--------------|--------------|---------|
| 1      | 10.789        | BB   | 0.2641      | 6184.39893   | 364.23044    | 97.7191 |
| 2      | 14.111        | BB   | 0.3776      | 144.34955    | 5.93810      | 2.2809  |

Totals :                    6328.74847   370.16853

=====  
 \*\*\* End of Report \*\*\*

**Figure S186.** HPLC spectra of **3ra**.

Data File D:\DATA\LJ\LJ-2-160\LJ-2-160 2020-08-24 21-25-26\003-2-LJ-2-160-RAC.D  
 Sample Name: LJ-2-160-RAC

```

=====
Acq. Operator   : SYSTEM                      Seq. Line :    3
Sample Operator : SYSTEM
Acq. Instrument : 1260                       Location  :    2
Injection Date  : 8/24/2020 9:58:46 PM      Inj       :    1
                                           Inj Volume: 5.000 µl
Acq. Method     : D:\Data\LJ\LJ-2-160\LJ-2-160 2020-08-24 21-25-26\P1-95-5-1.OML-SUL-220NM-
                254NM-20MIN.M
Last changed    : 8/13/2020 11:44:53 PM by SYSTEM
Analysis Method : D:\Data\LJ\LJ-2-160\LJ-2-160 2020-08-24 21-25-26\P1-95-5-1.OML-SUL-220NM-
                254NM-20MIN.M (Sequence Method)
Last changed    : 8/24/2020 10:22:58 PM by SYSTEM
                (modified after loading)
Additional Info : Peak(s) manually integrated
=====
  
```

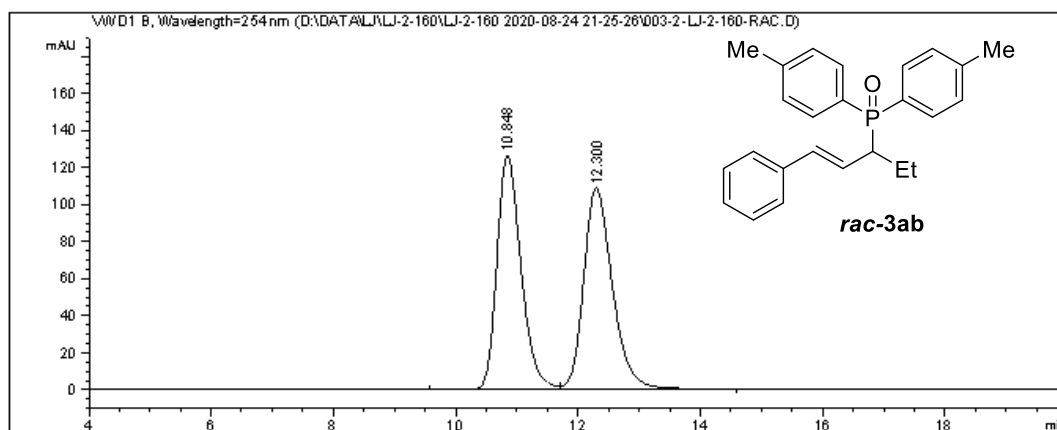

=====  
 Area Percent Report  
 =====

```

Sorted By      :      Signal
Multiplier     :      1.0000
Dilution      :      1.0000
Do not use Multiplier & Dilution Factor with ISTDs
  
```

Signal 1: WVD1 B, Wavelength=254 nm

| Peak # | RetTime [min] | Type | Width [min] | Area [mAU*s] | Height [mAU] | Area %  |
|--------|---------------|------|-------------|--------------|--------------|---------|
| 1      | 10.848        | BV   | 0.4204      | 3454.18530   | 126.55992    | 49.3569 |
| 2      | 12.300        | VB   | 0.4985      | 3544.19946   | 108.66531    | 50.6431 |

Totals :                    6998.38477   235.22523

=====  
 \*\*\* End of Report \*\*\*

**Figure S187.** HPLC spectra of *rac-3ab*.

Data File D:\Data\LJ\LJ-2-160\LJ-2-160 2020-08-24 21-25-26\002-1-LJ-2-160.D  
 Sample Name: LJ-2-160

```

=====
Acq. Operator   : SYSTEM                      Seq. Line :    2
Sample Operator : SYSTEM
Acq. Instrument : 1260                      Location  :    1
Injection Date  : 8/24/2020 9:38:00 PM      Inj       :    1
                                           Inj Volume: 5.000 µl
Acq. Method     : D:\Data\LJ\LJ-2-160\LJ-2-160 2020-08-24 21-25-26\P1-95-5-1.OML-SUL-220NM-
                254NM-20MIN.M
Last changed    : 8/13/2020 11:44:53 PM by SYSTEM
Analysis Method : D:\Data\LJ\LJ-2-160\LJ-2-160 2020-08-24 21-25-26\P1-95-5-1.OML-SUL-220NM-
                254NM-20MIN.M (Sequence Method)
Last changed    : 8/24/2020 10:28:58 PM by SYSTEM
                (modified after loading)
Additional Info  : Peak(s) manually integrated
=====
  
```

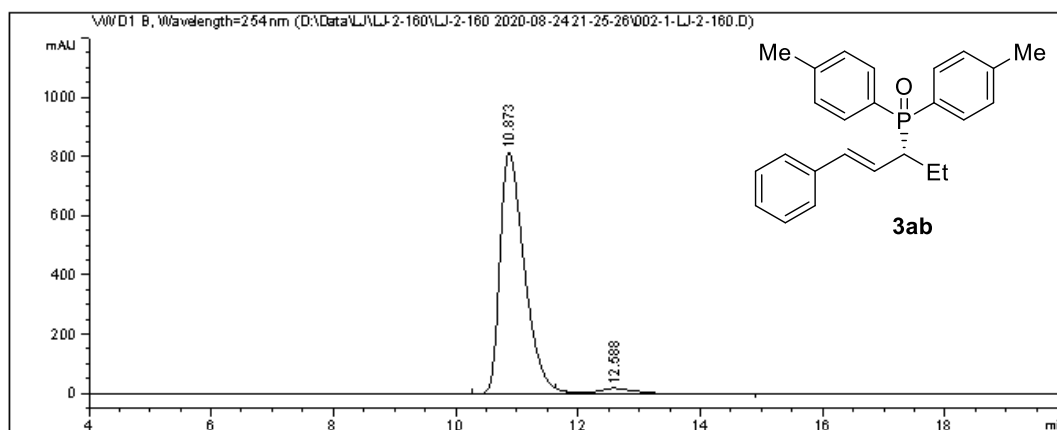

=====  
 Area Percent Report  
 =====

```

Sorted By      :      Signal
Multiplier     :      1.0000
Dilution       :      1.0000
Do not use Multiplier & Dilution Factor with ISTDs
  
```

Signal 1: VWD1 B, Wavelength=254 nm

| Peak # | RetTime [min] | Type | Width [min] | Area [mAU*s] | Height [mAU] | Area %  |
|--------|---------------|------|-------------|--------------|--------------|---------|
| 1      | 10.873        | BV R | 0.4233      | 2.25448e4    | 813.49200    | 96.8350 |
| 2      | 12.588        | VB E | 0.6498      | 736.87665    | 17.26945     | 3.1650  |

Totals :                    2.32817e4   830.76145

=====  
 \*\*\* End of Report \*\*\*

**Figure S188.** HPLC spectra of **3ab**.

Data File D:\Data\LJ\LJ-3-(28-31)\LJ-3-28-31 2020-11-15 05-47-02\005-74-LJ-3-29-RAC.D  
Sample Name: LJ-3-29-RAC

```
=====
Acq. Operator   : SYSTEM                      Seq. Line :    5
Sample Operator : SYSTEM
Acq. Instrument : 1260                       Location  :   74
Injection Date  : 11/15/2020 7:50:50 AM      Inj       :    1
                                           Inj Volume: 5.000 µl
Acq. Method     : D:\Data\LJ\LJ-3-(28-31)\LJ-3-28-31 2020-11-15 05-47-02\P1-90-10-1.OML-SUL-
                220NM-254NM-30MIN.M
Last changed    : 8/23/2020 2:17:04 AM by SYSTEM
Analysis Method : D:\Data\LJ\LJ-3-(28-31)\LJ-3-28-31 2020-11-15 05-47-02\P1-90-10-1.OML-SUL-
                220NM-254NM-30MIN.M (Sequence Method)
Last changed    : 11/15/2020 8:40:52 AM by SYSTEM
                (modified after loading)
Additional Info : Peak(s) manually integrated
=====
```

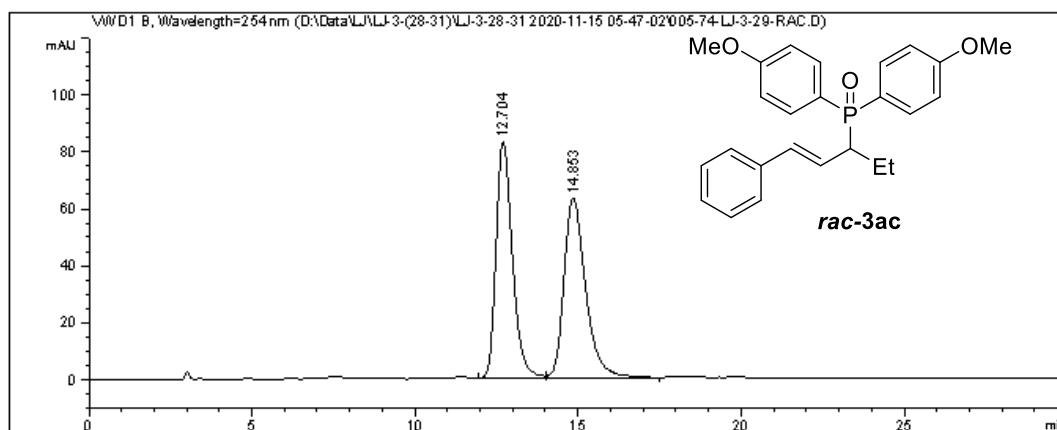

=====  
Area Percent Report  
=====

Sorted By : Signal  
Multiplier : 1.0000  
Dilution : 1.0000  
Do not use Multiplier & Dilution Factor with ISTDs

Signal 1: WWD1 B, Wavelength=254 nm

| Peak # | RetTime [min] | Type | Width [min] | Area [mAU*s] | Height [mAU] | Area %  |
|--------|---------------|------|-------------|--------------|--------------|---------|
| 1      | 12.704        | BV   | 0.5324      | 2874.15918   | 82.91635     | 49.8198 |
| 2      | 14.853        | VB   | 0.6969      | 2894.94653   | 63.14737     | 50.1802 |

Totals : 5769.10571 146.06372

=====  
\*\*\* End of Report \*\*\*

Figure S189. HPLC spectra of *rac-3ac*.

Data File D:\Data\LJ\LJ-3-(28-31)\LJ-3-28-31 2020-11-15 05-47-02\004-73-LJ-3-29.D  
 Sample Name: LJ-3-29

```

=====
Acq. Operator   : SYSTEM                      Seq. Line :    4
Sample Operator : SYSTEM
Acq. Instrument : 1260                        Location  :   73
Injection Date  : 11/15/2020 7:20:08 AM      Inj       :    1
                                           Inj Volume: 5.000 µl
Acq. Method     : D:\Data\LJ\LJ-3-(28-31)\LJ-3-28-31 2020-11-15 05-47-02\P1-90-10-1.OML-SUL-
                220NM-254NM-30MIN.M
Last changed    : 8/23/2020 2:17:04 AM by SYSTEM
Analysis Method : D:\Data\LJ\LJ-3-(28-31)\LJ-3-28-31 2020-11-15 05-47-02\P1-90-10-1.OML-SUL-
                220NM-254NM-30MIN.M (Sequence Method)
Last changed    : 11/15/2020 8:43:03 AM by SYSTEM
                (modified after loading)
Additional Info  : Peak(s) manually integrated
=====
  
```

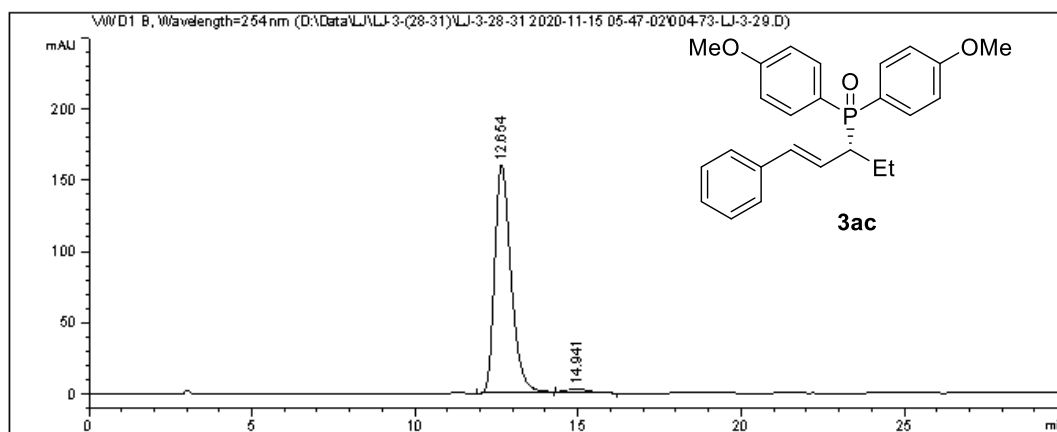

=====  
 Area Percent Report  
 =====

```

Sorted By      :      Signal
Multiplier     :      1.0000
Dilution       :      1.0000
Do not use Multiplier & Dilution Factor with ISTDs
  
```

Signal 1: VWD1 B, Wavelength=254 nm

| Peak # | RetTime [min] | Type | Width [min] | Area [mAU*s] | Height [mAU] | Area %  |
|--------|---------------|------|-------------|--------------|--------------|---------|
| 1      | 12.654        | BB   | 0.5322      | 5561.73242   | 159.75887    | 98.0703 |
| 2      | 14.941        | BB   | 0.6682      | 109.43578    | 2.47338      | 1.9297  |

Totals :                    5671.16820   162.23224

=====  
 \*\*\* End of Report \*\*\*

**Figure S190.** HPLC spectra of **3ac**.



Data File D:\Data\LJ\LJ-3-41-42\LJ-3-42 2020-11-26 20-11-11\015-71-LJ-3-42-RAC.D  
 Sample Name: LJ-3-42-RAC

```

=====
Acq. Operator   : SYSTEM                      Seq. Line :   15
Sample Operator : SYSTEM
Acq. Instrument : 1260                        Location  :   71
Injection Date  : 11/27/2020 1:26:37 AM      Inj       :    1
                                           Inj Volume: 5.000 µl
Acq. Method     : D:\Data\LJ\LJ-3-41-42\LJ-3-42 2020-11-26 20-11-11\P1-95-5-0.5ML-5UL-220NM-
                254NM-60MIN.M
Last changed    : 10/17/2020 10:05:29 PM by SYSTEM
Analysis Method : D:\Data\LJ\LJ-3-41-42\LJ-3-42 2020-11-26 20-11-11\P1-95-5-0.5ML-5UL-220NM-
                254NM-60MIN.M (Sequence Method)
Last changed    : 11/27/2020 3:36:20 AM by SYSTEM
                (modified after loading)
Additional Info  : Peak(s) manually integrated
=====
  
```

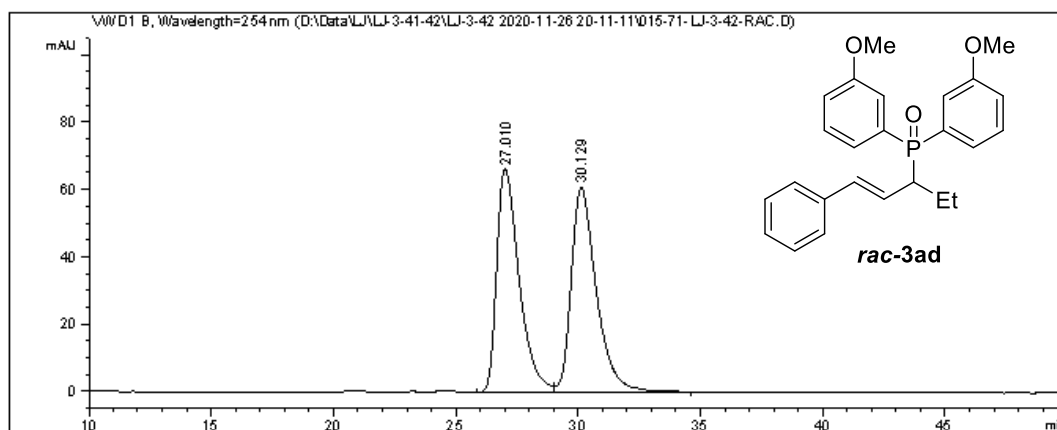

=====  
 Area Percent Report  
 =====

```

Sorted By       :      Signal
Multiplier      :      1.0000
Dilution        :      1.0000
Do not use Multiplier & Dilution Factor with ISTDs
  
```

Signal 1: WVD1 B, Wavelength=254 nm

| Peak # | RetTime [min] | Type | Width [min] | Area [mAU*s] | Height [mAU] | Area %  |
|--------|---------------|------|-------------|--------------|--------------|---------|
| 1      | 27.010        | BV   | 0.9829      | 4225.00928   | 66.16904     | 49.4354 |
| 2      | 30.129        | VB   | 1.0919      | 4321.51172   | 60.75058     | 50.5646 |

Totals :                    8546.52100   126.91962

=====  
 \*\*\* End of Report \*\*\*

**Figure S191.** HPLC spectra of *rac-3ad*.

Data File D:\DATA\LJ\LJ-3-41-42\LJ-3-42 2020-11-26 20-11-11\016-72-LJ-3-42.D  
 Sample Name: LJ-3-42

```

=====
Acq. Operator   : SYSTEM                      Seq. Line :   16
Sample Operator : SYSTEM
Acq. Instrument : 1260                       Location  :   72
Injection Date  : 11/27/2020 2:27:19 AM      Inj       :    1
                                           Inj Volume: 5.000 µl
Acq. Method     : D:\Data\LJ\LJ-3-41-42\LJ-3-42 2020-11-26 20-11-11\P1-95-5-0.5ML-5UL-220NM-
                254NM-60MIN.M
Last changed    : 10/17/2020 10:05:29 PM by SYSTEM
Analysis Method : D:\Data\LJ\LJ-3-41-42\LJ-3-42 2020-11-26 20-11-11\P1-95-5-0.5ML-5UL-220NM-
                254NM-60MIN.M (Sequence Method)
Last changed    : 11/27/2020 3:34:22 AM by SYSTEM
                (modified after loading)
Additional Info  : Peak(s) manually integrated
=====
  
```

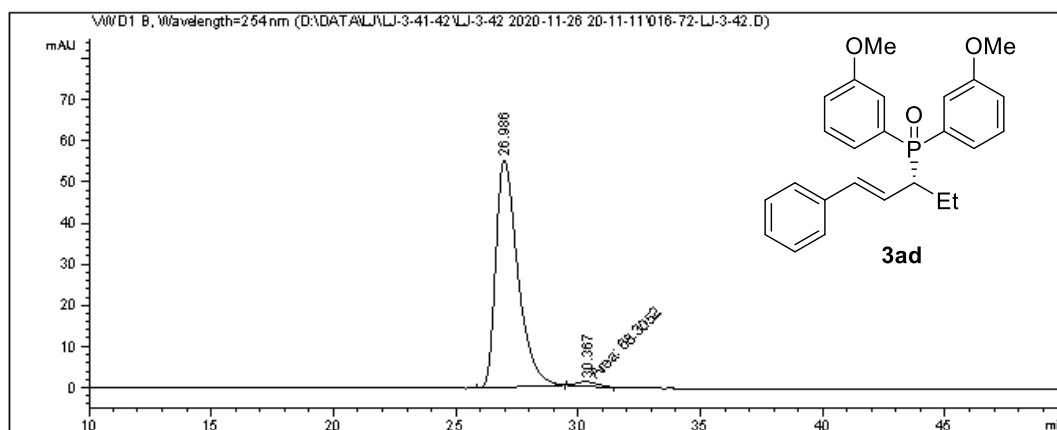

=====  
 Area Percent Report  
 =====

```

Sorted By      :      Signal
Multiplier     :      1.0000
Dilution      :      1.0000
Do not use Multiplier & Dilution Factor with ISTDs
  
```

Signal 1: VWD1 B, Wavelength=254 nm

| Peak # | RetTime [min] | Type | Width [min] | Area [mAU*s] | Height [mAU] | Area %  |
|--------|---------------|------|-------------|--------------|--------------|---------|
| 1      | 26.986        | BB   | 0.9641      | 3457.84937   | 55.25288     | 98.0629 |
| 2      | 30.367        | MM   | 1.0559      | 68.30518     | 1.07817      | 1.9371  |

Totals :                    3526.15454    56.33105

=====  
 \*\*\* End of Report \*\*\*

Figure S192. HPLC spectra of 3ad.

Data File D:\Data\LJ\LJ-3-(28-31)\LJ-3-28-31 2020-11-15 05-47-02\010-84-LJ-3-31-RAC.D  
 Sample Name: LJ-3-31-RAC

```

=====
Acq. Operator   : SYSTEM                      Seq. Line :   10
Sample Operator : SYSTEM
Acq. Instrument : 1260                      Location  :   84
Injection Date  : 11/15/2020 11:34:36 AM    Inj       :    1
                                           Inj Volume: 5.000 µl
Acq. Method     : D:\Data\LJ\LJ-3-(28-31)\LJ-3-28-31 2020-11-15 05-47-02\P2-80-20-1.OML-SUL-
                220NM-254NM-60MIN.M
Last changed    : 8/23/2020 2:25:51 AM by SYSTEM
Analysis Method : D:\Data\LJ\LJ-3-(28-31)\LJ-3-28-31 2020-11-15 05-47-02\P2-80-20-1.OML-SUL-
                220NM-254NM-60MIN.M (Sequence Method)
Last changed    : 11/16/2020 2:07:44 AM by SYSTEM
                (modified after loading)
=====
  
```

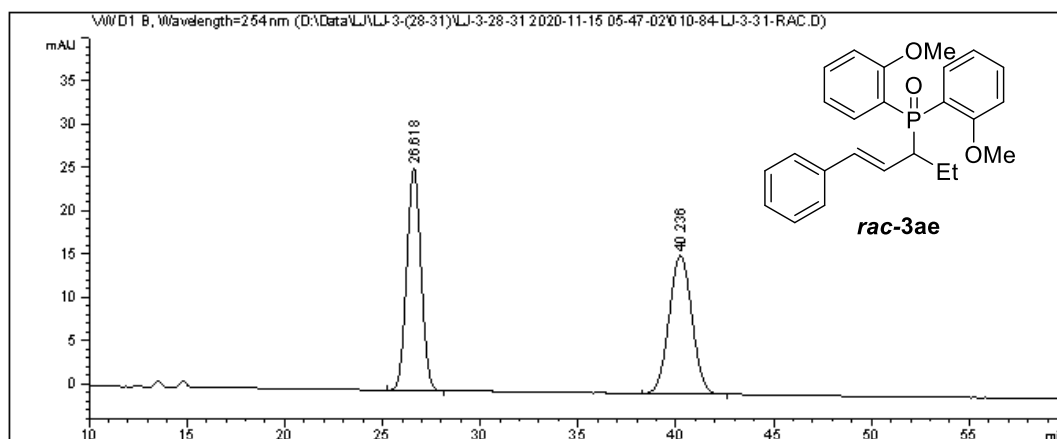

=====  
 Area Percent Report  
 =====

```

Sorted By      :      Signal
Multiplier     :      1.0000
Dilution      :      1.0000
Do not use Multiplier & Dilution Factor with ISTDs
  
```

Signal 1: VWD1 B, Wavelength=254 nm

| Peak # | RetTime [min] | Type | Width [min] | Area [mAU*s] | Height [mAU] | Area %  |
|--------|---------------|------|-------------|--------------|--------------|---------|
| 1      | 26.618        | BB   | 0.8026      | 1299.05530   | 25.66140     | 50.0266 |
| 2      | 40.236        | BB   | 1.2548      | 1297.67444   | 15.99031     | 49.9734 |

Totals :                    2596.72974    41.65171

=====  
 \*\*\* End of Report \*\*\*

**Figure S193.** HPLC spectra of *rac-3ae*.

Data File D:\Data\LJ\LJ-3-(28-31)\LJ-3-28-31 2020-11-15 05-47-02\009-83-LJ-3-31.D  
 Sample Name: LJ-3-31

```

=====
Acq. Operator   : SYSTEM                      Seq. Line :    9
Sample Operator : SYSTEM
Acq. Instrument : 1260                        Location  :   83
Injection Date  : 11/15/2020 10:33:52 AM      Inj       :    1
                                           Inj Volume: 5.000 µl
Acq. Method     : D:\Data\LJ\LJ-3-(28-31)\LJ-3-28-31 2020-11-15 05-47-02\P2-80-20-1.OML-SUL-
                220NM-254NM-60MIN.M
Last changed    : 8/23/2020 2:25:51 AM by SYSTEM
Analysis Method : D:\Data\LJ\LJ-3-(28-31)\LJ-3-28-31 2020-11-15 05-47-02\P2-80-20-1.OML-SUL-
                220NM-254NM-60MIN.M (Sequence Method)
Last changed    : 11/16/2020 2:09:18 AM by SYSTEM
                (modified after loading)
Additional Info  : Peak(s) manually integrated
=====
  
```

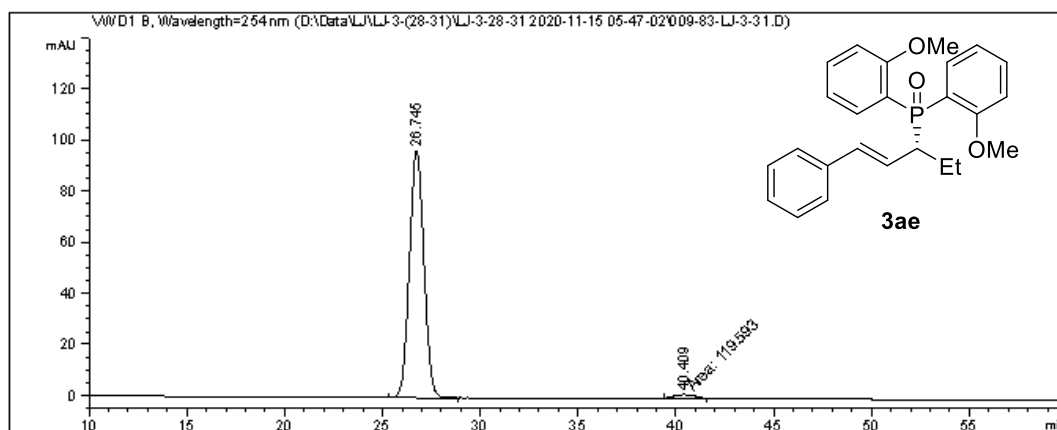

=====  
 Area Percent Report  
 =====

```

Sorted By      :      Signal
Multiplier     :      1.0000
Dilution       :      1.0000
Do not use Multiplier & Dilution Factor with ISTDs
  
```

Signal 1: WWD1 B, Wavelength=254 nm

| Peak # | RetTime [min] | Type | Width [min] | Area [mAU*s] | Height [mAU] | Area %  |
|--------|---------------|------|-------------|--------------|--------------|---------|
| 1      | 26.745        | BB   | 0.8142      | 4927.49365   | 96.75091     | 97.6304 |
| 2      | 40.409        | MM   | 1.2519      | 119.59342    | 1.59221      | 2.3696  |

Totals :                    5047.08707    98.34312

=====  
 \*\*\* End of Report \*\*\*

**Figure S194.** HPLC spectra of **3ae**.

Data File D:\DATA\LJ\LJ-3-26\LJ-3-26 2021-11-23 06-45-28\004-52-LJ-3-26-RAC.D  
 Sample Name: LJ-3-26-RAC

```

=====
Acq. Operator   : SYSTEM                      Seq. Line :    4
Sample Operator : SYSTEM
Acq. Instrument : 1260                        Location  :   52
Injection Date  : 11/23/2021 7:28:19 AM      Inj       :    1
                                           Inj Volume: 5.000 µl
Acq. Method     : D:\Data\LJ\LJ-3-26\LJ-3-26 2021-11-23 06-45-28\P2-90-10-1.OML-5UL-220NM-
                254NM-20MIN.M
Last changed    : 8/23/2020 2:28:48 AM by SYSTEM
Analysis Method : D:\Data\LJ\LJ-3-26\LJ-3-26 2021-11-23 06-45-28\P2-90-10-1.OML-5UL-220NM-
                254NM-20MIN.M (Sequence Method)
Last changed    : 11/30/2021 9:44:41 PM by SYSTEM
                (modified after loading)
Additional Info : Peak(s) manually integrated
=====
  
```

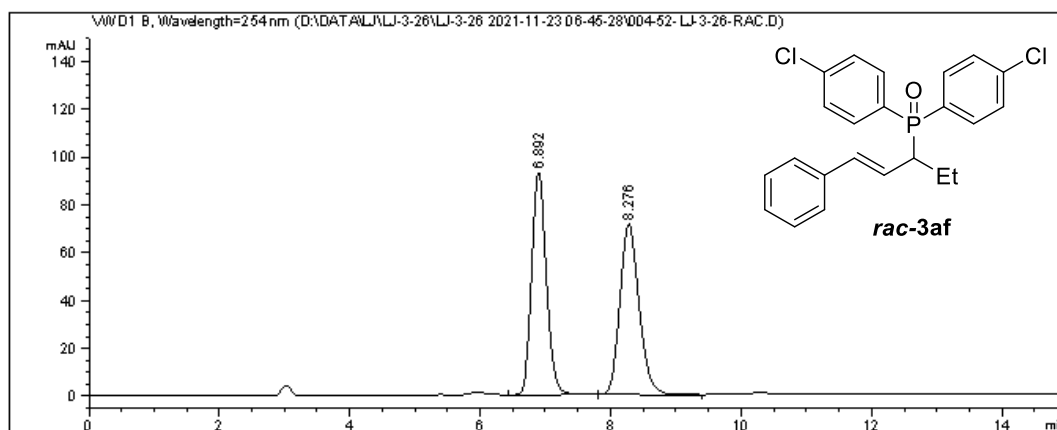

=====  
 Area Percent Report  
 =====

```

Sorted By      :      Signal
Multiplier     :      1.0000
Dilution      :      1.0000
Do not use Multiplier & Dilution Factor with ISTDs
  
```

Signal 1: VWD1 B, Wavelength=254 nm

| Peak # | RetTime [min] | Type | Width [min] | Area [mAU*s] | Height [mAU] | Area %  |
|--------|---------------|------|-------------|--------------|--------------|---------|
| 1      | 6.892         | BB   | 0.2437      | 1465.94177   | 93.12042     | 50.1376 |
| 2      | 8.276         | BB   | 0.3143      | 1457.89392   | 71.36427     | 49.8624 |

Totals :                    2923.83569   164.48470

=====  
 \*\*\* End of Report \*\*\*

**Figure S195.** HPLC spectra of *rac-3af*.

Data File D:\Data\LJ\LJ-3-26\LJ-3-26 2021-11-23 06-45-28\003-51-LJ-3-26.D  
Sample Name: LJ-3-26

```
=====
Acq. Operator   : SYSTEM                      Seq. Line :    3
Sample Operator : SYSTEM
Acq. Instrument : 1260                       Location  :   51
Injection Date  : 11/23/2021 7:07:37 AM      Inj       :    1
                                           Inj Volume: 5.000 µl
Acq. Method     : D:\Data\LJ\LJ-3-26\LJ-3-26 2021-11-23 06-45-28\P2-90-10-1.OML-5UL-220NM-
                254NM-20MIN.M
Last changed    : 8/23/2020 2:28:48 AM by SYSTEM
Analysis Method : D:\Data\LJ\LJ-3-26\LJ-3-26 2021-11-23 06-45-28\P2-90-10-1.OML-5UL-220NM-
                254NM-20MIN.M (Sequence Method)
Last changed    : 11/30/2021 9:48:11 PM by SYSTEM
                (modified after loading)
Additional Info : Peak(s) manually integrated
=====
```

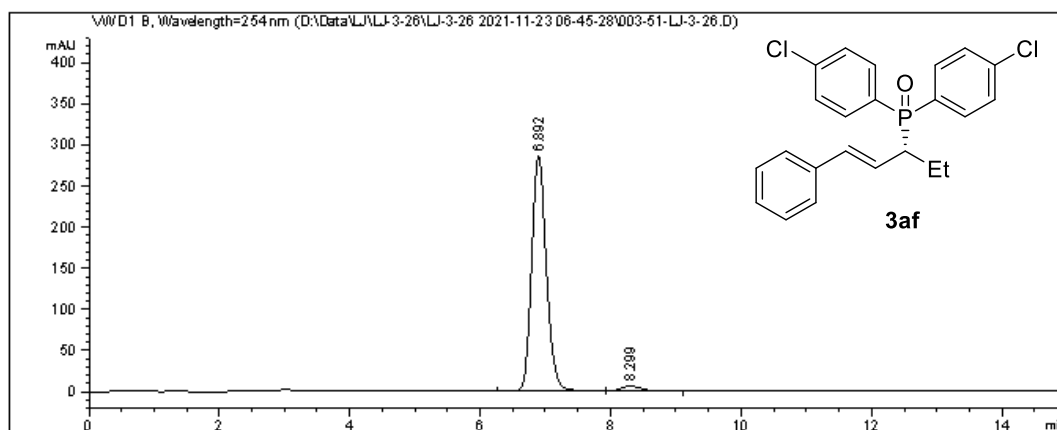

=====  
Area Percent Report  
=====

Sorted By : Signal  
Multiplier : 1.0000  
Dilution : 1.0000  
Do not use Multiplier & Dilution Factor with ISTDs

Signal 1: WVD1 B, Wavelength=254 nm

| Peak # | RetTime [min] | Type | Width [min] | Area [mAU*s] | Height [mAU] | Area %  |
|--------|---------------|------|-------------|--------------|--------------|---------|
| 1      | 6.892         | BV   | 0.2415      | 4498.04150   | 285.97031    | 97.0984 |
| 2      | 8.299         | VB   | 0.3346      | 134.41620    | 6.11198      | 2.9016  |

Totals : 4632.45770 292.08229

=====  
\*\*\* End of Report \*\*\*

Figure S196. HPLC spectra of 3af.

Data File D:\DATA\LJ\LJ-3-172-175\LJ-3-175 2021-11-23 03-53-24\002-60-LJ-3-175-RAC.D  
 Sample Name: LJ-3-175-RAC

```

=====
Acq. Operator   : SYSTEM                      Seq. Line :    2
Sample Operator : SYSTEM
Acq. Instrument : 1260                        Location  :   60
Injection Date  : 11/23/2021 4:04:59 AM      Inj       :    1
                                           Inj Volume: 5.000 µl
Acq. Method     : D:\Data\LJ\LJ-3-172-175\LJ-3-175 2021-11-23 03-53-24\P1-85-15-1.OML-5UL-
                220NM-254NM-30MIN.M
Last changed    : 10/15/2020 8:06:11 AM by SYSTEM
Analysis Method : D:\Data\LJ\LJ-3-172-175\LJ-3-175 2021-11-23 03-53-24\P1-85-15-1.OML-5UL-
                220NM-254NM-30MIN.M (Sequence Method)
Last changed    : 11/30/2021 10:26:39 PM by SYSTEM
                (modified after loading)
=====
  
```

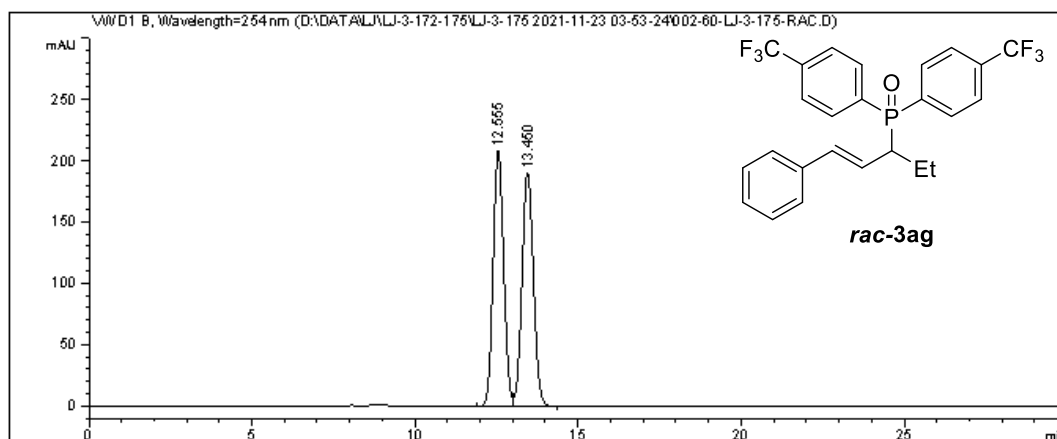

=====  
 Area Percent Report  
 =====

```

Sorted By      :      Signal
Multiplier     :      1.0000
Dilution       :      1.0000
Do not use Multiplier & Dilution Factor with ISTDs
  
```

Signal 1: WVD1 B, Wavelength=254 nm

| Peak # | RetTime [min] | Type | Width [min] | Area [mAU*s] | Height [mAU] | Area %  |
|--------|---------------|------|-------------|--------------|--------------|---------|
| 1      | 12.555        | BV   | 0.3494      | 4659.98291   | 207.95580    | 50.3178 |
| 2      | 13.450        | VB   | 0.3763      | 4601.12646   | 190.17068    | 49.6822 |

Totals :                    9261.10938   398.12648

=====  
 \*\*\* End of Report \*\*\*

**Figure S197.** HPLC spectra of *rac-3ag*.

Data File D:\Data\LJ\LJ-3-172-175\LJ-3-175 2021-11-23 03-53-24\003-59-LJ-3-175.D  
 Sample Name: LJ-3-175

```

=====
Acq. Operator   : SYSTEM                      Seq. Line :    3
Sample Operator : SYSTEM
Acq. Instrument : 1260                       Location  :   59
Injection Date  : 11/23/2021 4:35:42 AM      Inj       :    1
                                           Inj Volume: 5.000 µl
Acq. Method     : D:\Data\LJ\LJ-3-172-175\LJ-3-175 2021-11-23 03-53-24\P1-85-15-1.OML-5UL-
                220NM-254NM-30MIN.M
Last changed    : 10/15/2020 8:06:11 AM by SYSTEM
Analysis Method : D:\Data\LJ\LJ-3-172-175\LJ-3-175 2021-11-23 03-53-24\P1-85-15-1.OML-5UL-
                220NM-254NM-30MIN.M (Sequence Method)
Last changed    : 11/30/2021 10:28:33 PM by SYSTEM
                (modified after loading)
Additional Info  : Peak(s) manually integrated
=====
  
```

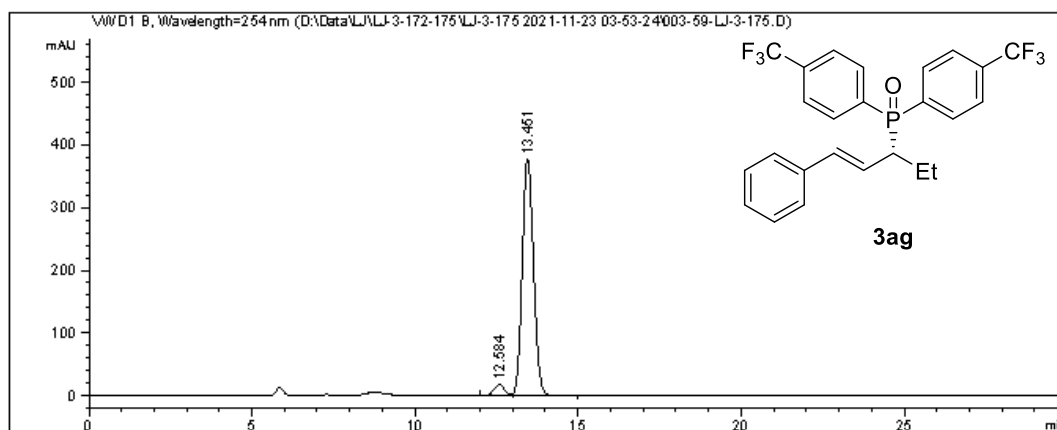

=====  
 Area Percent Report  
 =====

```

Sorted By      :      Signal
Multiplier     :      1.0000
Dilution       :      1.0000
Do not use Multiplier & Dilution Factor with ISTDs
  
```

Signal 1: WWD1 B, Wavelength=254 nm

| Peak # | RetTime [min] | Type | Width [min] | Area [mAU*s] | Height [mAU] | Area %  |
|--------|---------------|------|-------------|--------------|--------------|---------|
| 1      | 12.584        | BV E | 0.3404      | 388.81024    | 17.83380     | 4.1124  |
| 2      | 13.451        | VB R | 0.3718      | 9065.77051   | 378.01227    | 95.8876 |

Totals :                    9454.58075   395.84606

=====  
 \*\*\* End of Report \*\*\*

**Figure S198.** HPLC spectra of **3ag**.



Data File D:\DATA\LJ\LJ-3-17\LJ-3-17-2 2020-11-01 03-13-28\008-73-LJ-3-18-RAC.D  
 Sample Name: LJ-3-18-RAC

```

=====
Acq. Operator   : SYSTEM                      Seq. Line :    8
Sample Operator : SYSTEM
Acq. Instrument : 1260                       Location  :   73
Injection Date  : 11/1/2020 6:11:44 AM      Inj       :    1
                                           Inj Volume: 5.000 µl
Acq. Method     : D:\Data\LJ\LJ-3-17\LJ-3-17-2 2020-11-01 03-13-28\P1-90-10-1.OML-5UL-220NM-
                254NM-20MIN.M
Last changed    : 8/23/2020 2:15:51 AM by SYSTEM
Analysis Method : D:\Data\LJ\LJ-3-17\LJ-3-17-2 2020-11-01 03-13-28\P1-90-10-1.OML-5UL-220NM-
                254NM-20MIN.M (Sequence Method)
Last changed    : 11/3/2020 4:10:35 AM by SYSTEM
                (modified after loading)
Additional Info  : Peak(s) manually integrated
=====
  
```

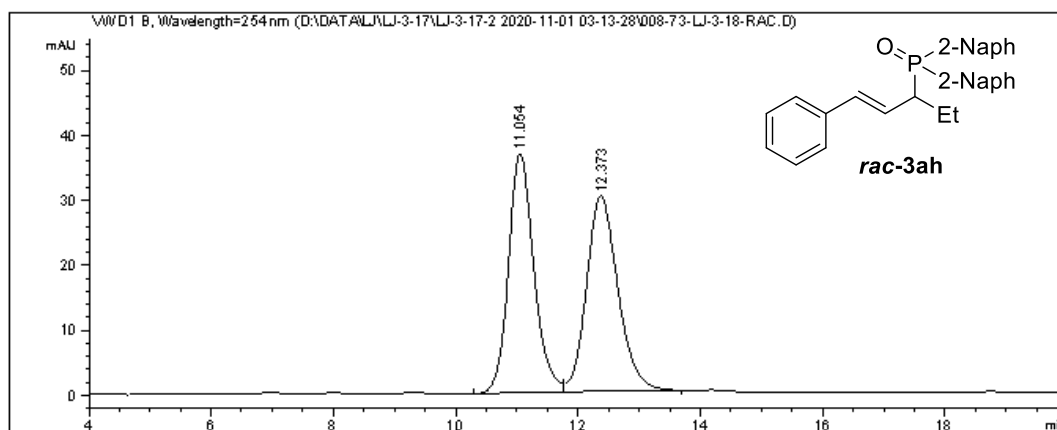

=====  
 Area Percent Report  
 =====

```

Sorted By      :      Signal
Multiplier     :      1.0000
Dilution       :      1.0000
Do not use Multiplier & Dilution Factor with ISTDs
  
```

Signal 1: WWD1 B, Wavelength=254 nm

| Peak # | RetTime [min] | Type | Width [min] | Area [mAU*s] | Height [mAU] | Area %  |
|--------|---------------|------|-------------|--------------|--------------|---------|
| 1      | 11.054        | BV   | 0.4444      | 1061.16504   | 36.80175     | 49.7449 |
| 2      | 12.373        | VB   | 0.5453      | 1072.04785   | 30.11871     | 50.2551 |

Totals :                    2133.21289    66.92046

=====  
 \*\*\* End of Report \*\*\*

**Figure S199.** HPLC spectra of *rac-3ah*.

Data File D:\Data\LJ\LJ-3-17\LJ-3-17-2 2020-11-01 03-13-28\006-71-LJ-3-18-2.D  
 Sample Name: LJ-3-18-2

```

=====
Acq. Operator   : SYSTEM                      Seq. Line :    6
Sample Operator : SYSTEM
Acq. Instrument : 1260                       Location  :   71
Injection Date  : 11/1/2020 5:30:19 AM       Inj       :    1
                                           Inj Volume: 5.000 µl

Acq. Method     : D:\Data\LJ\LJ-3-17\LJ-3-17-2 2020-11-01 03-13-28\P1-90-10-1.OML-5UL-220NM-
                254NM-20MIN.M
Last changed    : 8/23/2020 2:15:51 AM by SYSTEM
Analysis Method : D:\Data\LJ\LJ-3-17\LJ-3-17-2 2020-11-01 03-13-28\P1-90-10-1.OML-5UL-220NM-
                254NM-20MIN.M (Sequence Method)
Last changed    : 11/3/2020 4:12:44 AM by SYSTEM
                (modified after loading)
Additional Info  : Peak(s) manually integrated
=====
  
```

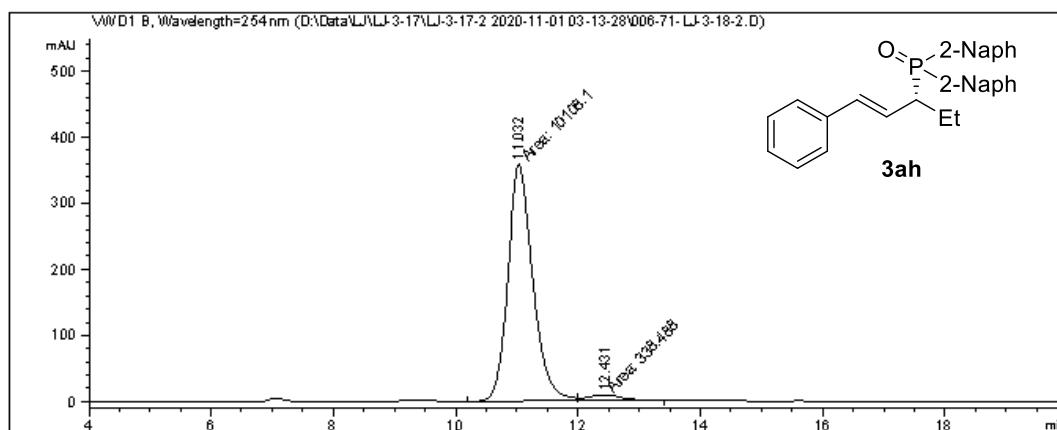

=====  
 Area Percent Report  
 =====

```

Sorted By      :      Signal
Multiplier     :      1.0000
Dilution       :      1.0000
Do not use Multiplier & Dilution Factor with ISTDs
  
```

Signal 1: VWD1 B, Wavelength=254 nm

| Peak # | RetTime [min] | Type | Width [min] | Area [mAU*s] | Height [mAU] | Area %  |
|--------|---------------|------|-------------|--------------|--------------|---------|
| 1      | 11.032        | MF   | 0.4704      | 1.01081e4    | 358.12711    | 96.7598 |
| 2      | 12.431        | FM   | 0.6509      | 338.48846    | 8.66681      | 3.2402  |

Totals :                    1.04466e4    366.79392

=====  
 \*\*\* End of Report \*\*\*

**Figure S200.** HPLC spectra of **3ah**.

Data File D:\Data\LJ\LJ-3-37-38\LJ-3-37-38 2020-11-21 20-43-46\005-84-LJ-3-38-RAC.D  
 Sample Name: LJ-3-38-RAC

```

=====
Acq. Operator   : SYSTEM                      Seq. Line :    5
Sample Operator : SYSTEM
Acq. Instrument : 1260                      Location  :   84
Injection Date  : 11/21/2020 11:00:33 PM      Inj       :    1
                                           Inj Volume: 5.000 µl
Acq. Method     : D:\Data\LJ\LJ-3-37-38\LJ-3-37-38 2020-11-21 20-43-46\P1-85-15-1.OML-5UL-
                220NM-254NM-40MIN.M
Last changed    : 11/21/2020 8:41:36 PM by SYSTEM
Analysis Method : D:\Data\LJ\LJ-3-37-38\LJ-3-37-38 2020-11-21 20-43-46\P1-85-15-1.OML-5UL-
                220NM-254NM-40MIN.M (Sequence Method)
Last changed    : 11/24/2020 2:33:33 AM by SYSTEM
                (modified after loading)
=====
  
```

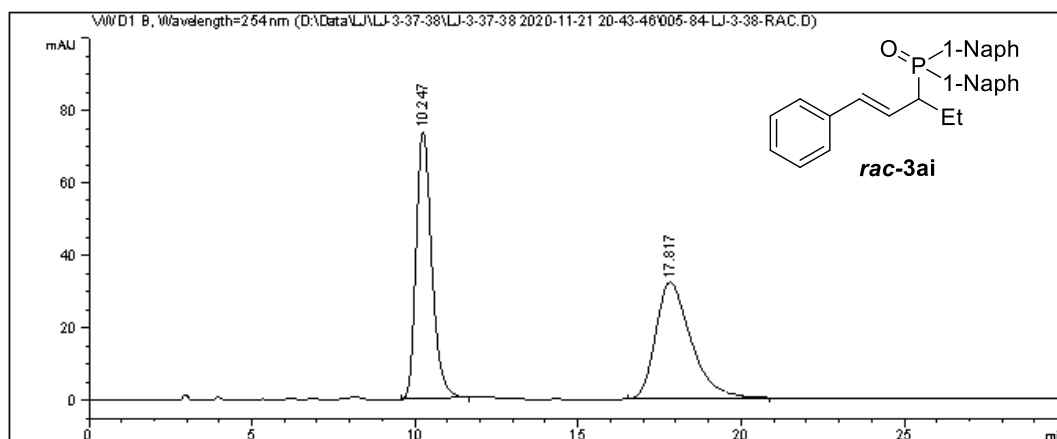

=====  
 Area Percent Report  
 =====

```

Sorted By      :      Signal
Multiplier     :      1.0000
Dilution       :      1.0000
Do not use Multiplier & Dilution Factor with ISTDs
  
```

Signal 1: VWD1 B, Wavelength=254 nm

| Peak # | RetTime [min] | Type | Width [min] | Area [mAU*s] | Height [mAU] | Area %  |
|--------|---------------|------|-------------|--------------|--------------|---------|
| 1      | 10.247        | BB   | 0.5134      | 2454.84033   | 73.55507     | 50.4260 |
| 2      | 17.817        | BB   | 1.1408      | 2413.35889   | 32.03956     | 49.5740 |

Totals :                    4868.19922   105.59463

=====  
 \*\*\* End of Report \*\*\*

**Figure S201.** HPLC spectra of *rac-3ai*.

Data File D:\Data\LJ\LJ-3-37-38\LJ-3-37-38 2020-11-21 20-43-46\004-83-LJ-3-38.D  
 Sample Name: LJ-3-38

```

=====
Acq. Operator   : SYSTEM                      Seq. Line :    4
Sample Operator : SYSTEM
Acq. Instrument : 1260                        Location  :   83
Injection Date  : 11/21/2020 10:19:51 PM      Inj       :    1
                                           Inj Volume: 5.000 µl
Acq. Method     : D:\Data\LJ\LJ-3-37-38\LJ-3-37-38 2020-11-21 20-43-46\P1-85-15-1.OML-5UL-
                220NM-254NM-40MIN.M
Last changed    : 11/21/2020 8:41:36 PM by SYSTEM
Analysis Method : D:\Data\LJ\LJ-3-37-38\LJ-3-37-38 2020-11-21 20-43-46\P1-85-15-1.OML-5UL-
                220NM-254NM-40MIN.M (Sequence Method)
Last changed    : 11/24/2020 2:34:57 AM by SYSTEM
                (modified after loading)
Additional Info  : Peak(s) manually integrated
=====
  
```

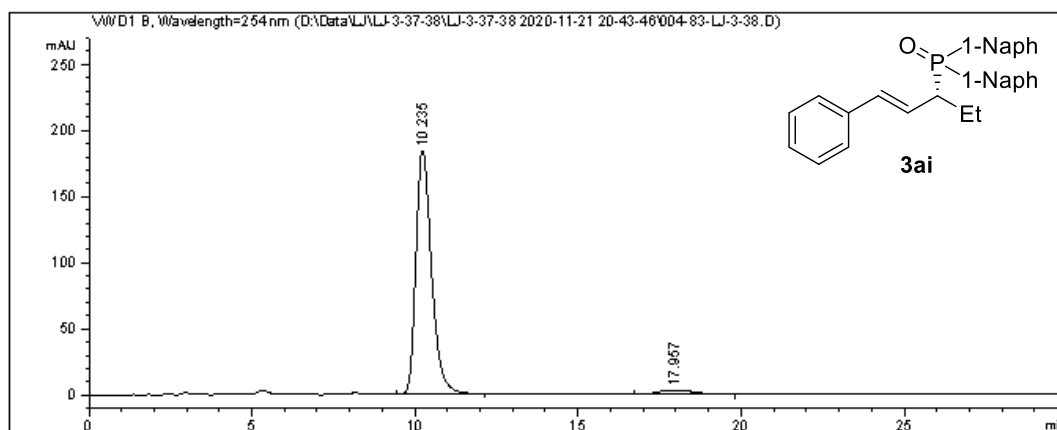

=====  
 Area Percent Report  
 =====

```

Sorted By      :      Signal
Multiplier     :      1.0000
Dilution       :      1.0000
Do not use Multiplier & Dilution Factor with ISTDs
  
```

Signal 1: VWD1 B, Wavelength=254 nm

| Peak # | RetTime [min] | Type | Width [min] | Area [mAU*s] | Height [mAU] | Area %  |
|--------|---------------|------|-------------|--------------|--------------|---------|
| 1      | 10.235        | BB   | 0.5097      | 6136.83301   | 184.66354    | 96.2812 |
| 2      | 17.957        | BB   | 1.1030      | 237.03291    | 3.12476      | 3.7188  |

Totals :                    6373.86592   187.78830

=====  
 \*\*\* End of Report \*\*\*

**Figure S202.** HPLC spectra of **3ai**.

Data File D:\DATA\LJ\LJ-3-46-47\LJ-3-46-47 2020-12-14 20-06-10\007-81-LJ-3-46-RAC.D  
 Sample Name: LJ-3-46-RAC

```

=====
Acq. Operator   : SYSTEM                      Seq. Line :    7
Sample Operator : SYSTEM
Acq. Instrument : 1260                        Location  :   81
Injection Date  : 12/14/2020 10:09:17 PM      Inj       :    1
                                           Inj Volume: 5.000 µl
Acq. Method     : D:\Data\LJ\LJ-3-46-47\LJ-3-46-47 2020-12-14 20-06-10\P2-85-15-1.OML-5UL-
                220NM-254NM-30MIN.M
Last changed    : 9/11/2020 5:47:45 AM by SYSTEM
Analysis Method : D:\Data\LJ\LJ-3-46-47\LJ-3-46-47 2020-12-14 20-06-10\P2-85-15-1.OML-5UL-
                220NM-254NM-30MIN.M (Sequence Method)
Last changed    : 12/15/2020 1:19:37 AM by SYSTEM
                (modified after loading)
=====
  
```

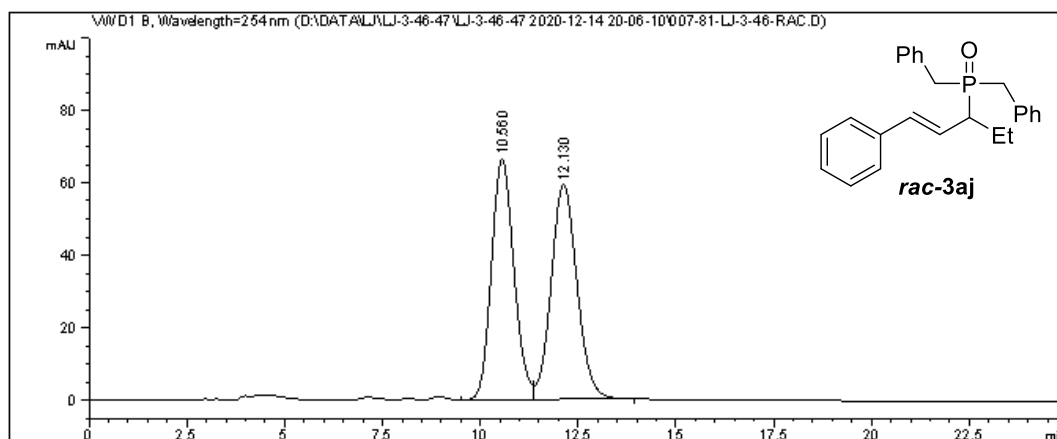

=====  
 Area Percent Report  
 =====

```

Sorted By      :      Signal
Multiplier     :      1.0000
Dilution       :      1.0000
Do not use Multiplier & Dilution Factor with ISTDs
  
```

Signal 1: WVD1 B, Wavelength=254 nm

| Peak # | RetTime [min] | Type | Width [min] | Area [mAU*s] | Height [mAU] | Area %  |
|--------|---------------|------|-------------|--------------|--------------|---------|
| 1      | 10.560        | BV   | 0.6171      | 2645.31274   | 66.35674     | 49.3712 |
| 2      | 12.130        | VB   | 0.7077      | 2712.69653   | 59.30025     | 50.6288 |

Totals :                    5358.00928   125.65700

=====  
 \*\*\* End of Report \*\*\*

**Figure S203.** HPLC spectra of *rac-3aj*.

Data File D:\Data\LJ\LJ-3-46-47\LJ-3-46-47 2020-12-14 20-06-10\008-71-LJ-3-46.D  
 Sample Name: LJ-3-46

```

=====
Acq. Operator   : SYSTEM                      Seq. Line :    8
Sample Operator : SYSTEM
Acq. Instrument : 1260                      Location  :   71
Injection Date  : 12/14/2020 10:40:01 PM    Inj       :    1
                                           Inj Volume: 5.000 µl
Acq. Method     : D:\Data\LJ\LJ-3-46-47\LJ-3-46-47 2020-12-14 20-06-10\P2-85-15-1.OML-5UL-
                220NM-254NM-30MIN.M
Last changed    : 12/14/2020 10:43:23 PM by SYSTEM
                (modified after loading)
Analysis Method : D:\Data\LJ\LJ-3-46-47\LJ-3-46-47 2020-12-14 20-06-10\P2-85-15-1.OML-5UL-
                220NM-254NM-30MIN.M (Sequence Method)
Last changed    : 12/15/2020 1:20:58 AM by SYSTEM
                (modified after loading)
Additional Info  : Peak(s) manually integrated
=====
  
```

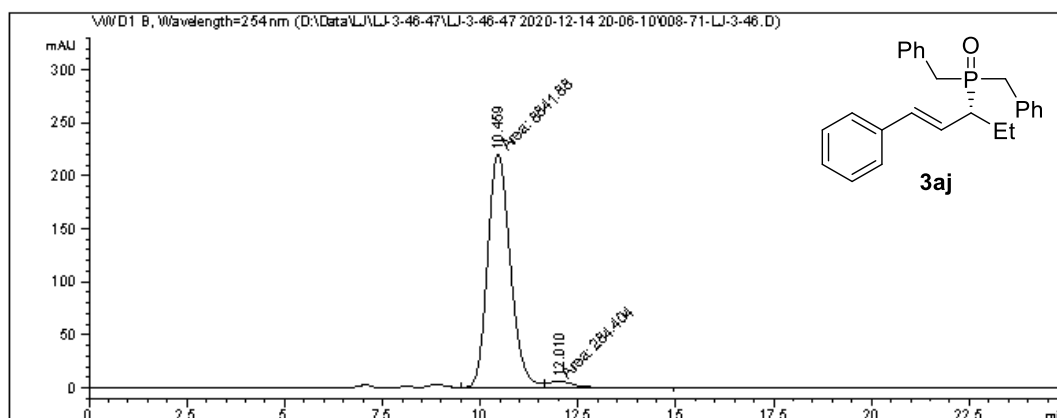

=====  
 Area Percent Report  
 =====

```

Sorted By      :      Signal
Multiplier     :      1.0000
Dilution      :      1.0000
Do not use Multiplier & Dilution Factor with ISTDs
  
```

Signal 1: WVD1 B, Wavelength=254 nm

| Peak # | RetTime [min] | Type | Width [min] | Area [mAU*s] | Height [mAU] | Area %  |
|--------|---------------|------|-------------|--------------|--------------|---------|
| 1      | 10.459        | MF   | 0.6676      | 8841.87695   | 220.74631    | 96.8837 |
| 2      | 12.010        | FM   | 0.7659      | 284.40363    | 6.18870      | 3.1163  |

Totals :                    9126.28058   226.93501

=====  
 \*\*\* End of Report \*\*\*

**Figure S204.** HPLC spectra of **3aj**.

Data File D:\DATA\LJ\LJ-2-137\LJ-2-137 2020-08-14 01-46-37\003-2-LJ-2-137-RAC.D  
 Sample Name: LJ-2-137-RAC

```

=====
Acq. Operator   : SYSTEM                      Seq. Line :    3
Sample Operator : SYSTEM
Acq. Instrument : 1260                        Location  :    2
Injection Date  : 8/14/2020 2:38:49 AM        Inj       :    1
                                           Inj Volume: 5.000 µl
Acq. Method     : D:\Data\LJ\LJ-2-137\LJ-2-137 2020-08-14 01-46-37\P2-80-20-1.OML-5UL-220NM-
                254NM-40MIN.M
Last changed    : 8/14/2020 1:43:33 AM by SYSTEM
Analysis Method : D:\Data\LJ\LJ-2-137\LJ-2-137 2020-08-14 01-46-37\P2-80-20-1.OML-5UL-220NM-
                254NM-40MIN.M (Sequence Method)
Last changed    : 8/24/2020 10:34:29 PM by SYSTEM
                (modified after loading)
Additional Info  : Peak(s) manually integrated
=====
  
```

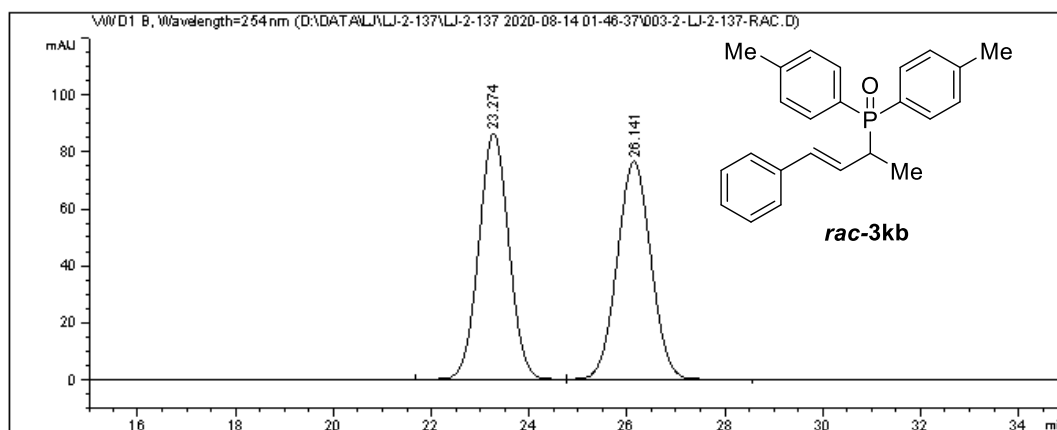

=====  
 Area Percent Report  
 =====

```

Sorted By      :      Signal
Multiplier     :      1.0000
Dilution      :      1.0000
Do not use Multiplier & Dilution Factor with ISTDs
  
```

Signal 1: VWD1 B, Wavelength=254 nm

| Peak # | RetTime [min] | Type | Width [min] | Area [mAU*s] | Height [mAU] | Area %  |
|--------|---------------|------|-------------|--------------|--------------|---------|
| 1      | 23.274        | BB   | 0.6647      | 3671.11426   | 86.23427     | 50.0542 |
| 2      | 26.141        | BB   | 0.7466      | 3663.16650   | 76.50616     | 49.9458 |

Totals :                    7334.28076   162.74043

=====  
 \*\*\* End of Report \*\*\*

**Figure S205.** HPLC spectra of *rac-3kb*.

Data File D:\Data\LJ\LJ-2-137\LJ-2-137 2020-08-14 01-46-37\002-1-LJ-2-137.D  
 Sample Name: LJ-2-137

```

=====
Acq. Operator   : SYSTEM                      Seq. Line :    2
Sample Operator : SYSTEM
Acq. Instrument : 1260                       Location  :    1
Injection Date  : 8/14/2020 1:58:03 AM       Inj       :    1
                                           Inj Volume: 5.000 µl
Acq. Method     : D:\Data\LJ\LJ-2-137\LJ-2-137 2020-08-14 01-46-37\P2-80-20-1.OML-5UL-220NM-
                254NM-40MIN.M
Last changed    : 8/14/2020 1:43:33 AM by SYSTEM
Analysis Method : D:\Data\LJ\LJ-2-137\LJ-2-137 2020-08-14 01-46-37\P2-80-20-1.OML-5UL-220NM-
                254NM-40MIN.M (Sequence Method)
Last changed    : 8/24/2020 10:37:03 PM by SYSTEM
                (modified after loading)
=====
  
```

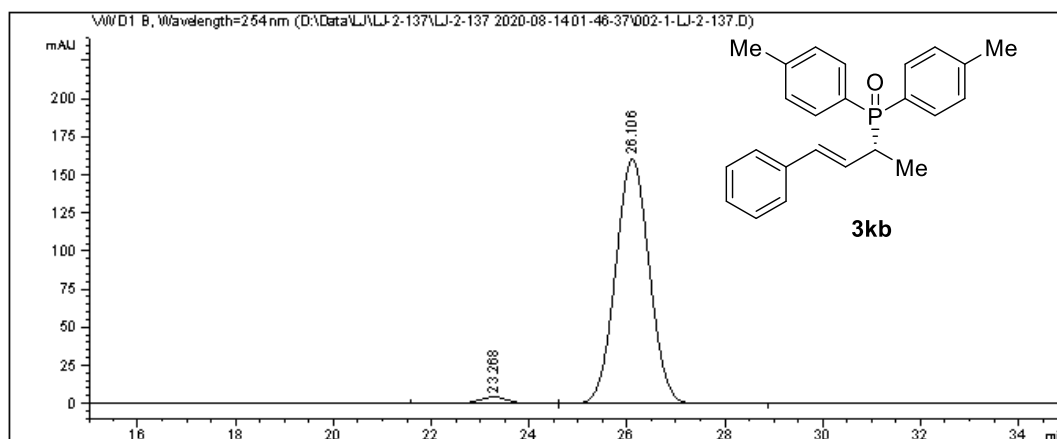

=====  
 Area Percent Report  
 =====

```

Sorted By      :      Signal
Multiplier     :      1.0000
Dilution       :      1.0000
Do not use Multiplier & Dilution Factor with ISTDs
  
```

Signal 1: VWD1 B, Wavelength=254 nm

| Peak # | RetTime [min] | Type | Width [min] | Area [mAU*s] | Height [mAU] | Area %  |
|--------|---------------|------|-------------|--------------|--------------|---------|
| 1      | 23.268        | BB   | 0.6702      | 188.35468    | 4.34128      | 2.3880  |
| 2      | 26.106        | BB   | 0.7482      | 7699.27930   | 160.91919    | 97.6120 |

Totals :                                7887.63397    165.26047

=====  
 \*\*\* End of Report \*\*\*

Figure S206. HPLC spectra of 3kb.



Data File D:\Data\LJ\LJ-3-(28-31)\LJ-3-28-31 2020-11-15 05-47-02\003-72-LJ-3-28-RAC.D  
 Sample Name: LJ-3-28-RAC

```

=====
Acq. Operator   : SYSTEM                      Seq. Line :    3
Sample Operator : SYSTEM
Acq. Instrument : 1260                      Location  :   72
Injection Date  : 11/15/2020 6:39:23 AM      Inj       :    1
                                           Inj Volume: 5.000 µl
Acq. Method     : D:\Data\LJ\LJ-3-(28-31)\LJ-3-28-31 2020-11-15 05-47-02\P1-90-10-1.OML-SUL-
                220NM-254NM-40MIN.M
Last changed    : 8/23/2020 2:17:41 AM by SYSTEM
Analysis Method : D:\Data\LJ\LJ-3-(28-31)\LJ-3-28-31 2020-11-15 05-47-02\P1-90-10-1.OML-SUL-
                220NM-254NM-40MIN.M (Sequence Method)
Last changed    : 11/15/2020 8:46:10 AM by SYSTEM
                (modified after loading)
Additional Info  : Peak(s) manually integrated
=====
  
```

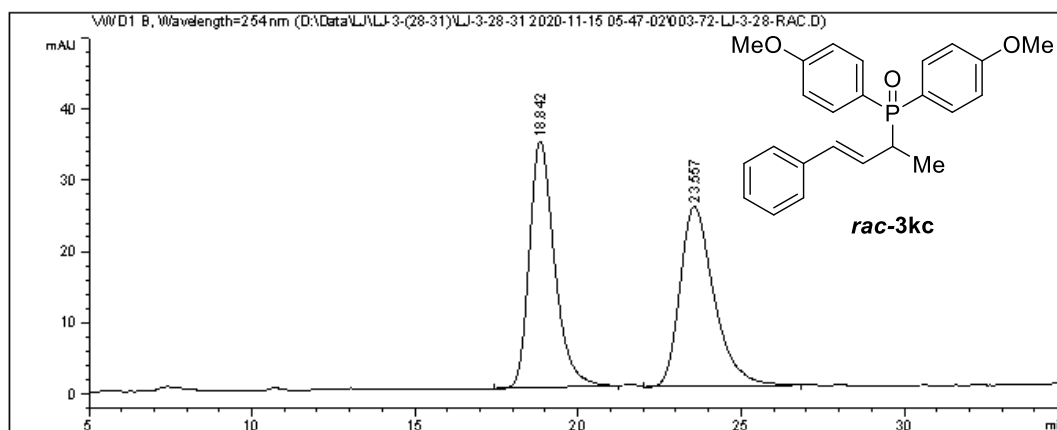

=====  
 Area Percent Report  
 =====

```

Sorted By      :      Signal
Multiplier     :      1.0000
Dilution      :      1.0000
Do not use Multiplier & Dilution Factor with ISTDs
  
```

Signal 1: WWD1 B, Wavelength=254 nm

| Peak # | RetTime [min] | Type | Width [min] | Area [mAU*s] | Height [mAU] | Area %  |
|--------|---------------|------|-------------|--------------|--------------|---------|
| 1      | 18.842        | BB   | 0.8074      | 1857.59900   | 34.54003     | 50.3459 |
| 2      | 23.557        | BB   | 1.0851      | 1832.07605   | 25.23262     | 49.6541 |

Totals :                    3689.67505    59.77265

=====  
 \*\*\* End of Report \*\*\*

**Figure S207.** HPLC spectra of *rac-3kc*.

Data File D:\Data\LJ\LJ-3-(28-31)\LJ-3-28-31 2020-11-15 05-47-02\002-71-LJ-3-28.D  
Sample Name: LJ-3-28

```
=====
Acq. Operator   : SYSTEM                      Seq. Line :    2
Sample Operator : SYSTEM
Acq. Instrument : 1260                        Location  :   71
Injection Date  : 11/15/2020 5:58:41 AM      Inj       :    1
                                           Inj Volume: 5.000 µl
Acq. Method     : D:\Data\LJ\LJ-3-(28-31)\LJ-3-28-31 2020-11-15 05-47-02\P1-90-10-1.OML-SUL-
                220NM-254NM-40MIN.M
Last changed    : 8/23/2020 2:17:41 AM by SYSTEM
Analysis Method : D:\Data\LJ\LJ-3-(28-31)\LJ-3-28-31 2020-11-15 05-47-02\P1-90-10-1.OML-SUL-
                220NM-254NM-40MIN.M (Sequence Method)
Last changed    : 11/15/2020 8:47:50 AM by SYSTEM
                (modified after loading)
Additional Info  : Peak(s) manually integrated
=====
```

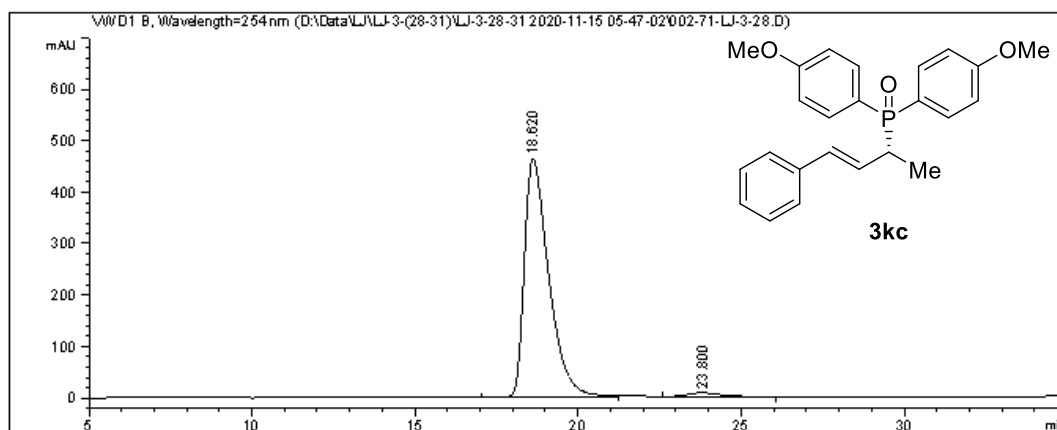

=====  
Area Percent Report  
=====

```
Sorted By      : Signal
Multiplier     : 1.0000
Dilution       : 1.0000
Do not use Multiplier & Dilution Factor with ISTDs
```

Signal 1: VWD1 B, Wavelength=254 nm

| Peak # | RetTime [min] | Type | Width [min] | Area [mAU*s] | Height [mAU] | Area %  |
|--------|---------------|------|-------------|--------------|--------------|---------|
| 1      | 18.620        | BB   | 0.7920      | 2.39771e4    | 463.17120    | 97.5451 |
| 2      | 23.800        | BB   | 1.0673      | 603.44043    | 8.36791      | 2.4549  |

Totals : 2.45806e4 471.53912

=====  
\*\*\* End of Report \*\*\*

Figure S208. HPLC spectra of 3kc.

Data File D:\Data\LJ\LJ-3-41-42\LJ-3-42 2020-11-26 20-11-11\005-81-LJ-3-41-RAC.D  
 Sample Name: LJ-3-41-RAC

```

=====
Acq. Operator   : SYSTEM                      Seq. Line :    5
Sample Operator : SYSTEM
Acq. Instrument : 1260                       Location  :   81
Injection Date  : 11/26/2020 9:59:12 PM      Inj       :    1
                                           Inj Volume: 5.000 µl
Acq. Method     : D:\Data\LJ\LJ-3-41-42\LJ-3-42 2020-11-26 20-11-11\P1-90-10-1.OML-5UL-220NM-
                254NM-30MIN.M
Last changed    : 8/23/2020 2:17:04 AM by SYSTEM
Analysis Method : D:\Data\LJ\LJ-3-41-42\LJ-3-42 2020-11-26 20-11-11\P1-90-10-1.OML-5UL-220NM-
                254NM-30MIN.M (Sequence Method)
Last changed    : 11/27/2020 3:40:24 AM by SYSTEM
                (modified after loading)
Additional Info  : Peak(s) manually integrated
=====
  
```

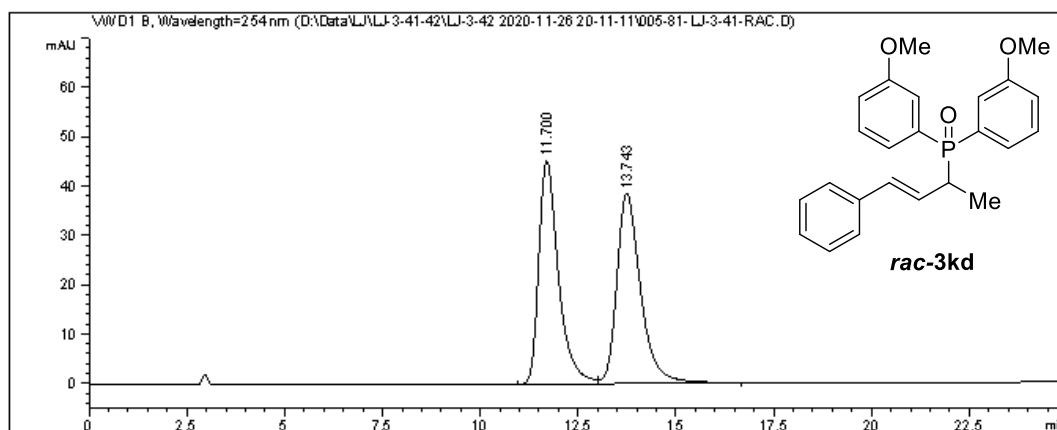

=====  
 Area Percent Report  
 =====

```

Sorted By      :      Signal
Multiplier     :      1.0000
Dilution       :      1.0000
Do not use Multiplier & Dilution Factor with ISTDs
  
```

Signal 1: VWD1 B, Wavelength=254 nm

| Peak # | RetTime [min] | Type | Width [min] | Area [mAU*s] | Height [mAU] | Area %  |
|--------|---------------|------|-------------|--------------|--------------|---------|
| 1      | 11.700        | BV   | 0.5288      | 1585.78796   | 45.25752     | 49.3502 |
| 2      | 13.743        | VB   | 0.6394      | 1627.55164   | 38.48030     | 50.6498 |

Totals :                    3213.33960    83.73782

=====  
 \*\*\* End of Report \*\*\*

**Figure S209.** HPLC spectra of *rac-3kd*.

Data File D:\Data\LJ\LJ-3-41-42\LJ-3-42 2020-11-26 20-11-11\006-82-LJ-3-41.D  
Sample Name: LJ-3-41

```
=====
Acq. Operator   : SYSTEM                      Seq. Line :    6
Sample Operator : SYSTEM
Acq. Instrument : 1260                       Location  :   82
Injection Date  : 11/26/2020 10:29:55 PM     Inj       :    1
                                           Inj Volume: 5.000 µl
Acq. Method     : D:\Data\LJ\LJ-3-41-42\LJ-3-42 2020-11-26 20-11-11\P1-90-10-1.OML-5UL-220NM-
                254NM-30MIN.M
Last changed    : 8/23/2020 2:17:04 AM by SYSTEM
Analysis Method : D:\Data\LJ\LJ-3-41-42\LJ-3-42 2020-11-26 20-11-11\P1-90-10-1.OML-5UL-220NM-
                254NM-30MIN.M (Sequence Method)
Last changed    : 11/27/2020 3:41:52 AM by SYSTEM
                (modified after loading)
=====
```

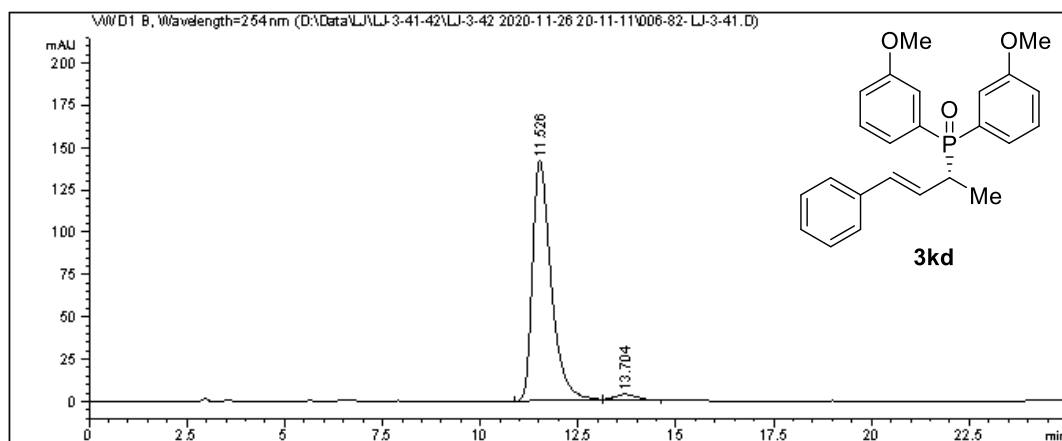

=====  
Area Percent Report  
=====

Sorted By : Signal  
Multiplier : 1.0000  
Dilution : 1.0000  
Do not use Multiplier & Dilution Factor with ISTDs

Signal 1: VWD1 B, Wavelength=254 nm

| Peak # | RetTime [min] | Type | Width [min] | Area [mAU*s] | Height [mAU] | Area %  |
|--------|---------------|------|-------------|--------------|--------------|---------|
| 1      | 11.526        | BB   | 0.5040      | 4712.57764   | 141.68825    | 97.5494 |
| 2      | 13.704        | BB   | 0.5836      | 118.38741    | 3.15595      | 2.4506  |

Totals : 4830.96505 144.84420

=====  
\*\*\* End of Report \*\*\*

Figure S210. HPLC spectra of 3kd.

Data File D:\Data\LJ\LJ-3-(28-31)\LJ-3-28-31 2020-11-15 05-47-02\008-82-LJ-3-30-RAC.D  
 Sample Name: LJ-3-30-RAC

```

=====
Acq. Operator   : SYSTEM                      Seq. Line :    8
Sample Operator : SYSTEM
Acq. Instrument : 1260                        Location  :   82
Injection Date  : 11/15/2020 9:33:10 AM      Inj       :    1
                                           Inj Volume: 5.000 µl
Acq. Method     : D:\Data\LJ\LJ-3-(28-31)\LJ-3-28-31 2020-11-15 05-47-02\P2-80-20-1.OML-SUL-
                220NM-254NM-60MIN.M
Last changed    : 8/23/2020 2:25:51 AM by SYSTEM
Analysis Method : D:\Data\LJ\LJ-3-(28-31)\LJ-3-28-31 2020-11-15 05-47-02\P2-80-20-1.OML-SUL-
                220NM-254NM-60MIN.M (Sequence Method)
Last changed    : 11/16/2020 2:03:20 AM by SYSTEM
                (modified after loading)
=====
  
```

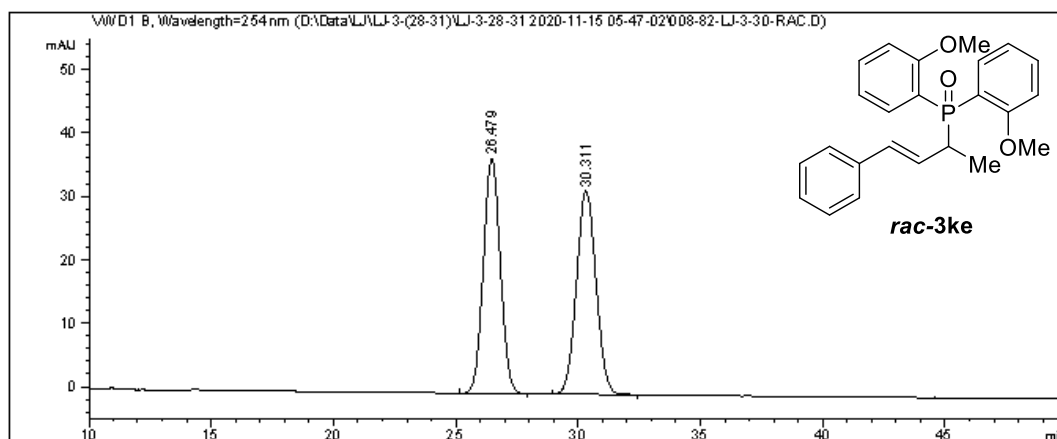

=====  
 Area Percent Report  
 =====

```

Sorted By      :      Signal
Multiplier     :      1.0000
Dilution      :      1.0000
Do not use Multiplier & Dilution Factor with ISTDs
  
```

Signal 1: WWD1 B, Wavelength=254 nm

| Peak # | RetTime [min] | Type | Width [min] | Area [mAU*s] | Height [mAU] | Area %  |
|--------|---------------|------|-------------|--------------|--------------|---------|
| 1      | 26.479        | BB   | 0.7273      | 1782.61914   | 36.91867     | 50.0178 |
| 2      | 30.311        | BB   | 0.8797      | 1781.34717   | 31.98925     | 49.9822 |

Totals :                    3563.96631    68.90792

=====  
 \*\*\* End of Report \*\*\*

Figure S211. HPLC spectra of *rac-3ke*.

Data File D:\Data\LJ\LJ-3-(28-31)\LJ-3-28-31 2020-11-15 05-47-02\007-81-LJ-3-30.D  
 Sample Name: LJ-3-30

```

=====
Acq. Operator   : SYSTEM                      Seq. Line :    7
Sample Operator : SYSTEM
Acq. Instrument : 1260                        Location  :   81
Injection Date  : 11/15/2020 8:32:26 AM      Inj       :    1
                                           Inj Volume: 5.000 µl
Acq. Method     : D:\Data\LJ\LJ-3-(28-31)\LJ-3-28-31 2020-11-15 05-47-02\P2-80-20-1.OML-SUL-
                220NM-254NM-60MIN.M
Last changed    : 8/23/2020 2:25:51 AM by SYSTEM
Analysis Method : D:\Data\LJ\LJ-3-(28-31)\LJ-3-28-31 2020-11-15 05-47-02\P2-80-20-1.OML-SUL-
                220NM-254NM-60MIN.M (Sequence Method)
Last changed    : 11/16/2020 2:04:57 AM by SYSTEM
                (modified after loading)
=====
  
```

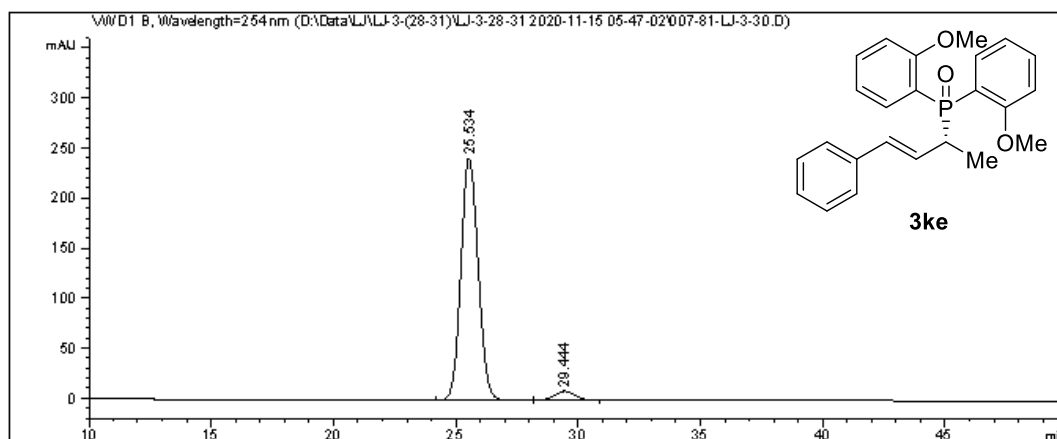

=====  
 Area Percent Report  
 =====

```

Sorted By      :      Signal
Multiplier     :      1.0000
Dilution      :      1.0000
Do not use Multiplier & Dilution Factor with ISTDs
  
```

Signal 1: VWD1 B, Wavelength=254 nm

| Peak # | RetTime [min] | Type | Width [min] | Area [mAU*s] | Height [mAU] | Area %  |
|--------|---------------|------|-------------|--------------|--------------|---------|
| 1      | 25.534        | BB   | 0.7543      | 1.17393e4    | 240.99101    | 95.9858 |
| 2      | 29.444        | BB   | 0.8453      | 490.94220    | 8.71404      | 4.0142  |

Totals :                    1.22303e4   249.70505

=====  
 \*\*\* End of Report \*\*\*

Figure S212. HPLC spectra of 3ke.

Data File D:\Data\LJ\LJ-3-20\LJ-3-20 2020-11-04 23-30-42\003-72-LJ-3-20-RAC.D  
 Sample Name: LJ-3-20-RAC

```

=====
Acq. Operator   : SYSTEM                      Seq. Line :    3
Sample Operator : SYSTEM
Acq. Instrument : 1260                       Location  :   72
Injection Date  : 11/5/2020 12:15:38 AM      Inj       :    1
                                           Inj Volume: 5.000 µl

Acq. Method     : D:\Data\LJ\LJ-3-20\LJ-3-20 2020-11-04 23-30-42\P1-90-10-1.OML-5UL-220NM-
                254NM-30MIN.M
Last changed    : 8/23/2020 2:17:04 AM by SYSTEM
Analysis Method : D:\Data\LJ\LJ-3-20\LJ-3-20 2020-11-04 23-30-42\P1-90-10-1.OML-5UL-220NM-
                254NM-30MIN.M (Sequence Method)
Last changed    : 11/5/2020 1:39:03 AM by SYSTEM
                (modified after loading)
Additional Info  : Peak(s) manually integrated
=====
  
```

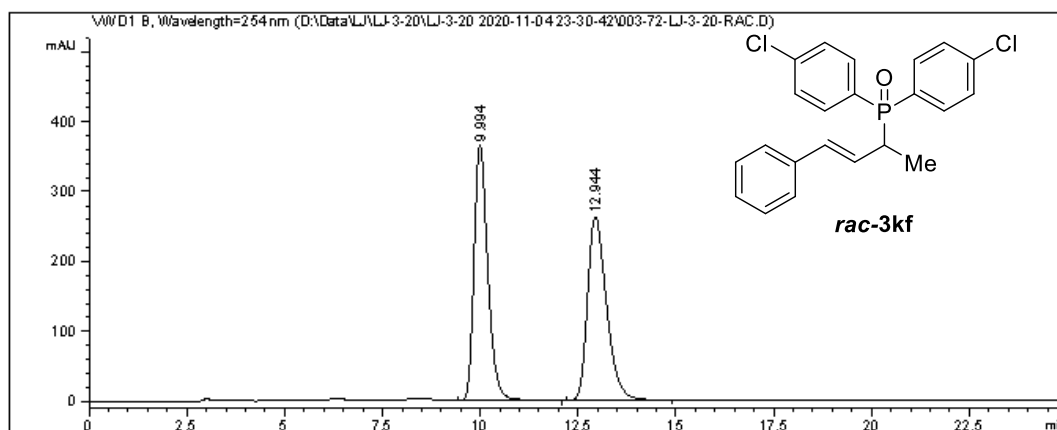

=====  
 Area Percent Report  
 =====

```

Sorted By      :      Signal
Multiplier     :      1.0000
Dilution       :      1.0000
Do not use Multiplier & Dilution Factor with ISTDs
  
```

Signal 1: WVD1 B, Wavelength=254 nm

| Peak # | RetTime [min] | Type | Width [min] | Area [mAU*s] | Height [mAU] | Area %  |
|--------|---------------|------|-------------|--------------|--------------|---------|
| 1      | 9.994         | BB   | 0.3790      | 8991.90918   | 365.49130    | 50.0701 |
| 2      | 12.944        | BB   | 0.5194      | 8966.74414   | 263.22888    | 49.9299 |

Totals :                    1.79587e4    628.72018

=====  
 \*\*\* End of Report \*\*\*

**Figure S213.** HPLC spectra of *rac-3kf*.

Data File D:\Data\LJ\LJ-3-20\LJ-3-20 2020-11-04 23-30-42\002-71-LJ-3-20.D  
 Sample Name: LJ-3-20

```

=====
Acq. Operator   : SYSTEM                      Seq. Line :    2
Sample Operator : SYSTEM
Acq. Instrument : 1260                      Location  :   71
Injection Date  : 11/4/2020 11:44:56 PM      Inj       :    1
                                           Inj Volume: 5.000 µl
Acq. Method     : D:\Data\LJ\LJ-3-20\LJ-3-20 2020-11-04 23-30-42\P1-90-10-1.OML-5UL-220NM-
                254NM-30MIN.M
Last changed    : 8/23/2020 2:17:04 AM by SYSTEM
Analysis Method : D:\Data\LJ\LJ-3-20\LJ-3-20 2020-11-04 23-30-42\P1-90-10-1.OML-5UL-220NM-
                254NM-30MIN.M (Sequence Method)
Last changed    : 11/5/2020 1:41:48 AM by SYSTEM
                (modified after loading)
Additional Info : Peak(s) manually integrated
=====
  
```

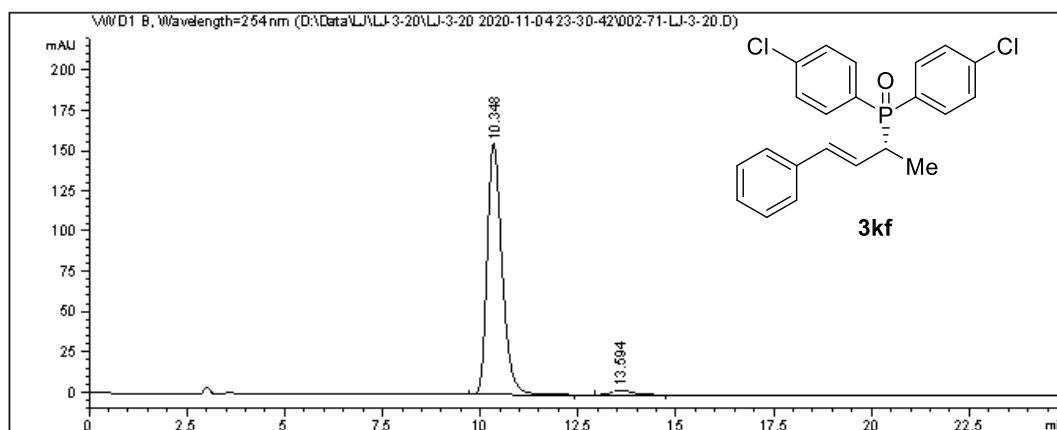

=====  
 Area Percent Report  
 =====

```

Sorted By      :      Signal
Multiplier     :      1.0000
Dilution       :      1.0000
Do not use Multiplier & Dilution Factor with ISTDs
  
```

Signal 1: VWD1 B, Wavelength=254 nm

| Peak # | RetTime [min] | Type | Width [min] | Area [mAU*s] | Height [mAU] | Area %  |
|--------|---------------|------|-------------|--------------|--------------|---------|
| 1      | 10.348        | BB   | 0.4063      | 4116.49121   | 155.77254    | 97.3663 |
| 2      | 13.594        | BB   | 0.5849      | 111.35025    | 2.89402      | 2.6337  |

Totals :                    4227.84146   158.66656

=====  
 \*\*\* End of Report \*\*\*

**Figure S214.** HPLC spectra of **3kf**.



Data File D:\Data\LJ\LJ-3-172-175\LJ-3-172-175 2021-11-22 21-42-48\010-58-LJ-3-174-RAC.D  
 Sample Name: LJ-3-174-RAC

```

=====
Acq. Operator   : SYSTEM                      Seq. Line :   10
Sample Operator : SYSTEM
Acq. Instrument : 1260                       Location  :   58
Injection Date  : 11/23/2021 2:30:17 AM      Inj       :    1
                                           Inj Volume: 5.000 µl
Acq. Method     : D:\Data\LJ\LJ-3-172-175\LJ-3-172-175 2021-11-22 21-42-48\P1-85-15-1.OML-5UL
                  -220NM-254NM-30MIN.M
Last changed    : 10/15/2020 8:06:11 AM by SYSTEM
Analysis Method : D:\Data\LJ\LJ-3-172-175\LJ-3-172-175 2021-11-22 21-42-48\P1-85-15-1.OML-5UL
                  -220NM-254NM-30MIN.M (Sequence Method)
Last changed    : 11/30/2021 10:22:39 PM by SYSTEM
                  (modified after loading)
Additional Info  : Peak(s) manually integrated
=====
  
```

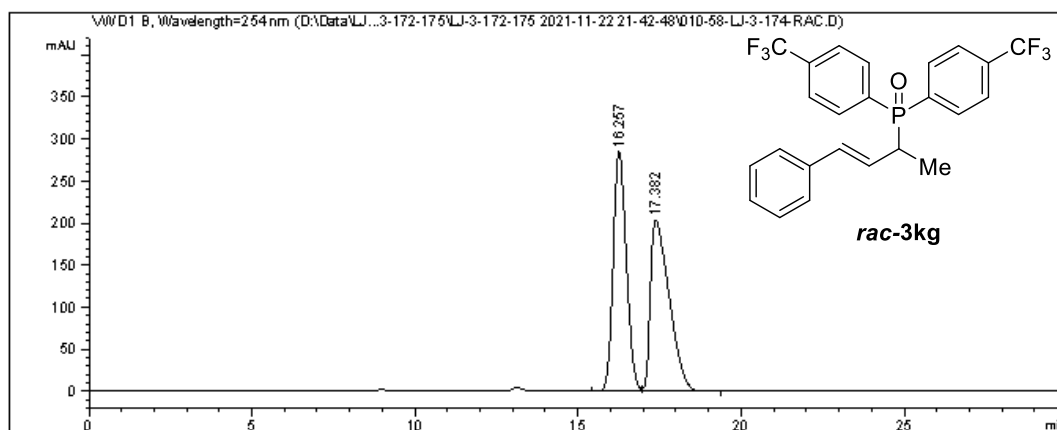

=====  
 Area Percent Report  
 =====

```

Sorted By      :      Signal
Multiplier     :      1.0000
Dilution      :      1.0000
Do not use Multiplier & Dilution Factor with ISTDs
  
```

Signal 1: WWD1 B, Wavelength=254 nm

| Peak # | RetTime [min] | Type | Width [min] | Area [mAU*s] | Height [mAU] | Area %  |
|--------|---------------|------|-------------|--------------|--------------|---------|
| 1      | 16.257        | BV   | 0.4399      | 8012.74365   | 285.11063    | 49.6146 |
| 2      | 17.382        | VB   | 0.6224      | 8137.24121   | 203.56592    | 50.3854 |

Totals :                    1.61500e4    488.67654

=====  
 \*\*\* End of Report \*\*\*

**Figure S215.** HPLC spectra of *rac-3kg*.

Data File D:\Data\LJ\LJ-3-172-175\LJ-3-172-175 2021-11-22 21-42-48\009-57-LJ-3-174.D  
 Sample Name: LJ-3-174

```

=====
Acq. Operator   : SYSTEM                      Seq. Line :    9
Sample Operator : SYSTEM
Acq. Instrument : 1260                       Location  :   57
Injection Date  : 11/23/2021 1:59:35 AM      Inj       :    1
                                           Inj Volume: 5.000 µl
Acq. Method     : D:\Data\LJ\LJ-3-172-175\LJ-3-172-175 2021-11-22 21-42-48\P1-85-15-1.OML-5UL
                  -220NM-254NM-30MIN.M
Last changed    : 10/15/2020 8:06:11 AM by SYSTEM
Analysis Method : D:\Data\LJ\LJ-3-172-175\LJ-3-172-175 2021-11-22 21-42-48\P1-85-15-1.OML-5UL
                  -220NM-254NM-30MIN.M (Sequence Method)
Last changed    : 11/30/2021 10:24:40 PM by SYSTEM
                  (modified after loading)
Additional Info : Peak(s) manually integrated
=====
  
```

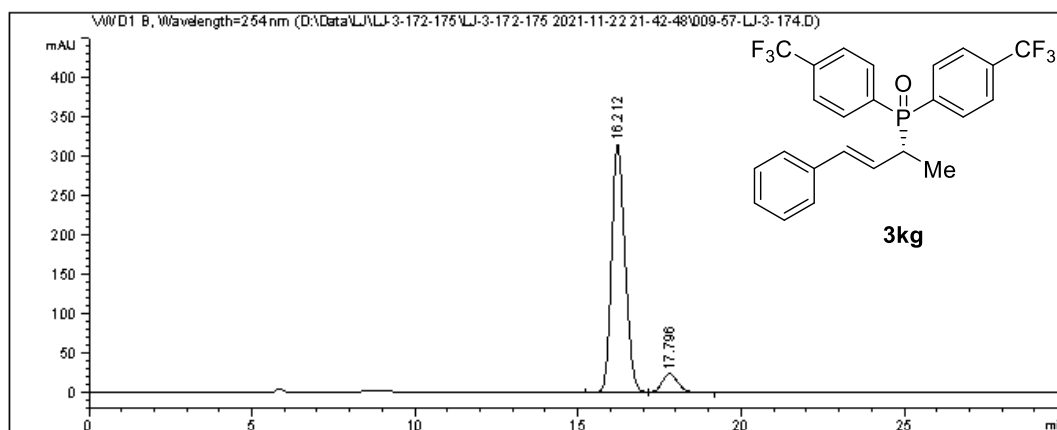

Area Percent Report

```

Sorted By      : Signal
Multiplier     : 1.0000
Dilution       : 1.0000
Do not use Multiplier & Dilution Factor with ISTDs
  
```

Signal 1: VWD1 B, Wavelength=254 nm

| Peak # | RetTime [min] | Type | Width [min] | Area [mAU*s] | Height [mAU] | Area %  |
|--------|---------------|------|-------------|--------------|--------------|---------|
| 1      | 16.212        | BV   | 0.4476      | 9031.64258   | 313.98929    | 92.0705 |
| 2      | 17.796        | VB   | 0.5130      | 777.84515    | 23.56837     | 7.9295  |

Totals : 9809.48773 337.55766

\*\*\* End of Report \*\*\*

Figure S216. HPLC spectra of 3kg.

Data File D:\DATA\LJ\LJ-3-17\LJ-3-17 2020-10-31 05-44-19\002-92-LJ-3-17-RAC.D  
 Sample Name: LJ-3-17-RAC

```

=====
Acq. Operator   : SYSTEM                      Seq. Line :    2
Sample Operator : SYSTEM
Acq. Instrument : 1260                       Location  :   92
Injection Date  : 10/31/2020 5:55:58 AM      Inj       :    1
                                           Inj Volume: 5.000 µl
Acq. Method     : D:\Data\LJ\LJ-3-17\LJ-3-17 2020-10-31 05-44-19\P1-90-10-1.OML-5UL-220NM-
                254NM-40MIN.M
Last changed    : 8/23/2020 2:17:41 AM by SYSTEM
Analysis Method : D:\Data\LJ\LJ-3-17\LJ-3-17 2020-10-31 05-44-19\P1-90-10-1.OML-5UL-220NM-
                254NM-40MIN.M (Sequence Method)
Last changed    : 11/3/2020 4:05:38 AM by SYSTEM
                (modified after loading)
Additional Info  : Peak(s) manually integrated
=====
  
```

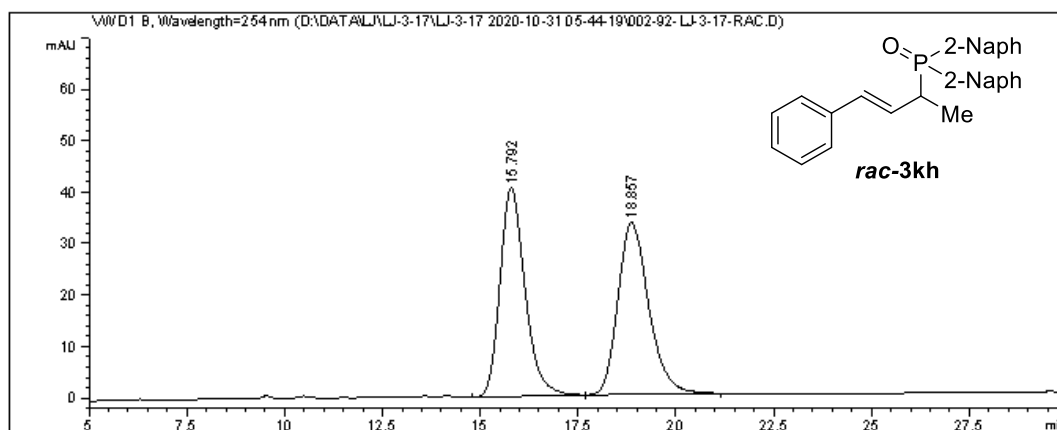

=====  
 Area Percent Report  
 =====

```

Sorted By      :      Signal
Multiplier     :      1.0000
Dilution      :      1.0000
Do not use Multiplier & Dilution Factor with ISTDs
  
```

Signal 1: WVD1 B, Wavelength=254 nm

| Peak # | RetTime [min] | Type | Width [min] | Area [mAU*s] | Height [mAU] | Area %  |
|--------|---------------|------|-------------|--------------|--------------|---------|
| 1      | 15.792        | BB   | 0.6843      | 1801.55627   | 40.54876     | 49.5166 |
| 2      | 18.857        | BB   | 0.8497      | 1836.73120   | 33.49660     | 50.4834 |

Totals :                    3638.28748    74.04536

=====  
 \*\*\* End of Report \*\*\*

**Figure S217.** HPLC spectra of *rac-3kh*.

Data File D:\DATA\LJ\LJ-3-17\LJ-3-17-2 2020-11-01 03-13-28\004-83-LJ-3-17-4.D  
 Sample Name: LJ-3-17-4

```

=====
Acq. Operator   : SYSTEM                      Seq. Line :    4
Sample Operator : SYSTEM
Acq. Instrument : 1260                       Location  :   83
Injection Date  : 11/1/2020 4:28:48 AM       Inj       :    1
                                           Inj Volume: 5.000 µl
Acq. Method     : D:\Data\LJ\LJ-3-17\LJ-3-17-2 2020-11-01 03-13-28\P1-90-10-1.OML-5UL-220NM-
                254NM-30MIN.M
Last changed    : 8/23/2020 2:17:04 AM by SYSTEM
Analysis Method : D:\Data\LJ\LJ-3-17\LJ-3-17-2 2020-11-01 03-13-28\P1-90-10-1.OML-5UL-220NM-
                254NM-30MIN.M (Sequence Method)
Last changed    : 11/3/2020 4:07:54 AM by SYSTEM
                (modified after loading)
Additional Info  : Peak(s) manually integrated
=====
  
```

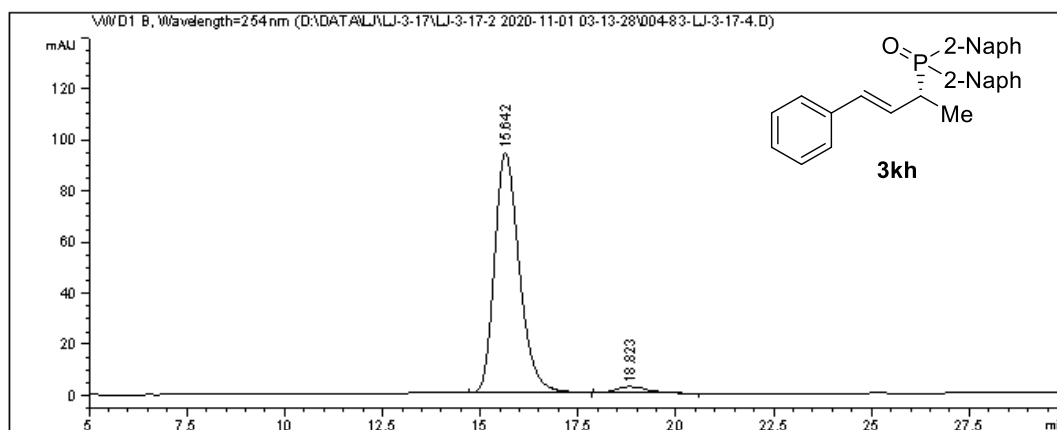

=====  
 Area Percent Report  
 =====

```

Sorted By      :      Signal
Multiplier     :      1.0000
Dilution       :      1.0000
Do not use Multiplier & Dilution Factor with ISTDs
  
```

Signal 1: VWD1 B, Wavelength=254 nm

| Peak # | RetTime [min] | Type | Width [min] | Area [mAU*s] | Height [mAU] | Area %  |
|--------|---------------|------|-------------|--------------|--------------|---------|
| 1      | 15.642        | BB   | 0.6761      | 4126.66162   | 94.01119     | 96.6910 |
| 2      | 18.823        | BB   | 0.8704      | 141.22437    | 2.48738      | 3.3090  |

Totals :                    4267.88599    96.49857

=====  
 \*\*\* End of Report \*\*\*

**Figure S218.** HPLC spectra of 3kh.

Data File D:\DATA\LJ\LJ-3-37-38\LJ-3-37-38 2020-11-21 20-43-46\003-82-LJ-3-37-RAC.D  
 Sample Name: LJ-3-37-RAC

```

=====
Acq. Operator   : SYSTEM                               Seq. Line :    3
Sample Operator : SYSTEM
Acq. Instrument : 1260                                 Location  :   82
Injection Date  : 11/21/2020 9:39:08 PM              Inj       :    1
                                                    Inj Volume: 5.000 µl
Acq. Method     : D:\Data\LJ\LJ-3-37-38\LJ-3-37-38 2020-11-21 20-43-46\P1-85-15-1.OML-5UL-
                220NM-254NM-40MIN.M
Last changed    : 11/21/2020 8:41:36 PM by SYSTEM
Analysis Method : D:\Data\LJ\LJ-3-37-38\LJ-3-37-38 2020-11-21 20-43-46\P1-85-15-1.OML-5UL-
                220NM-254NM-40MIN.M (Sequence Method)
Last changed    : 11/24/2020 2:29:34 AM by SYSTEM
                (modified after loading)
Additional Info  : Peak(s) manually integrated
=====
  
```

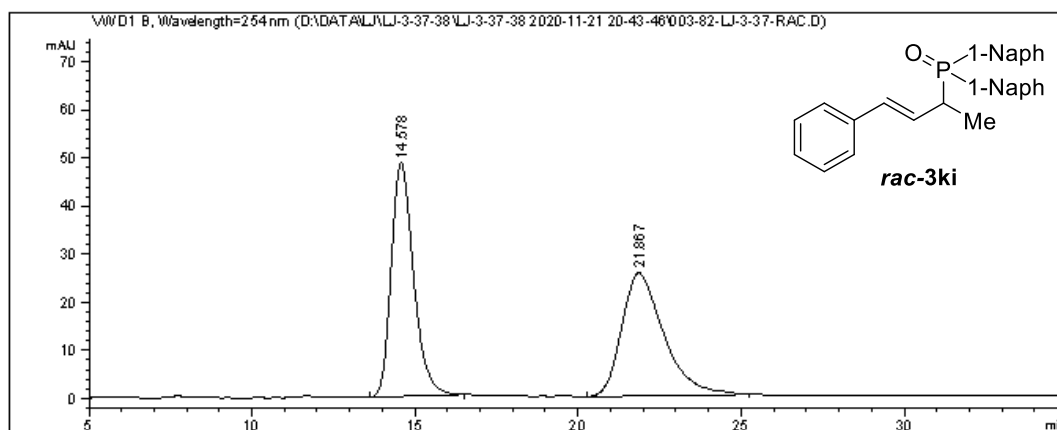

=====  
 Area Percent Report  
 =====

```

Sorted By      :      Signal
Multiplier     :      1.0000
Dilution       :      1.0000
Do not use Multiplier & Dilution Factor with ISTDs
  
```

Signal 1: WVD1 B, Wavelength=254 nm

| Peak # | RetTime [min] | Type | Width [min] | Area [mAU*s] | Height [mAU] | Area %  |
|--------|---------------|------|-------------|--------------|--------------|---------|
| 1      | 14.578        | BB   | 0.7375      | 2310.86719   | 48.53537     | 50.2512 |
| 2      | 21.867        | BB   | 1.3524      | 2287.76343   | 25.65475     | 49.7488 |

Totals :                    4598.63062    74.19011

=====  
 \*\*\* End of Report \*\*\*

**Figure S219.** HPLC spectra of *rac-3ki*.

Data File D:\Data\LJ\LJ-3-37-38\LJ-3-37-38 2020-11-21 20-43-46\002-81-LJ-3-37.D  
 Sample Name: LJ-3-37

```

=====
Acq. Operator   : SYSTEM                      Seq. Line :    2
Sample Operator : SYSTEM
Acq. Instrument : 1260                        Location  :   81
Injection Date  : 11/21/2020 8:58:25 PM      Inj       :    1
                                           Inj Volume: 5.000 µl
Acq. Method     : D:\Data\LJ\LJ-3-37-38\LJ-3-37-38 2020-11-21 20-43-46\P1-85-15-1.OML-5UL-
                220NM-254NM-40MIN.M
Last changed    : 11/21/2020 8:41:36 PM by SYSTEM
Analysis Method : D:\Data\LJ\LJ-3-37-38\LJ-3-37-38 2020-11-21 20-43-46\P1-85-15-1.OML-5UL-
                220NM-254NM-40MIN.M (Sequence Method)
Last changed    : 11/24/2020 2:31:35 AM by SYSTEM
                (modified after loading)
Additional Info  : Peak(s) manually integrated
=====
  
```

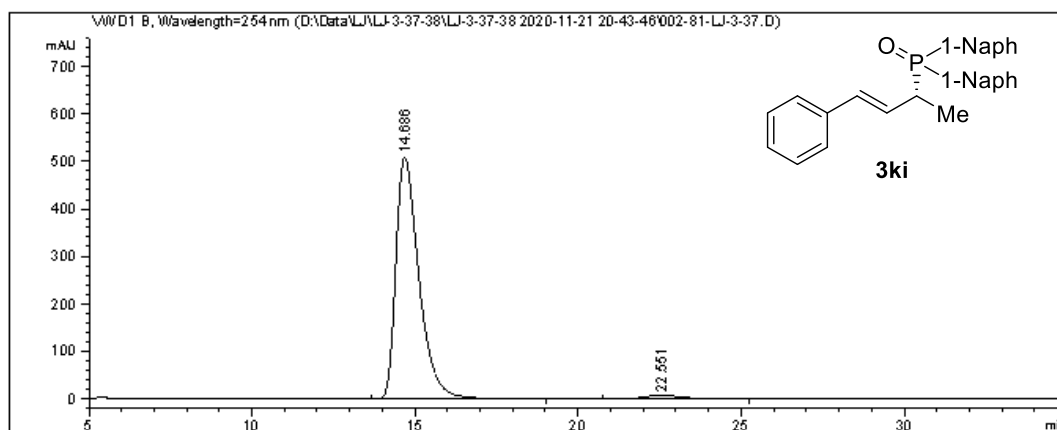

=====  
 Area Percent Report  
 =====

```

Sorted By       :      Signal
Multiplier      :      1.0000
Dilution        :      1.0000
Do not use Multiplier & Dilution Factor with ISTDs
  
```

Signal 1: WWD1 B, Wavelength=254 nm

| Peak # | RetTime [min] | Type | Width [min] | Area [mAU*s] | Height [mAU] | Area %  |
|--------|---------------|------|-------------|--------------|--------------|---------|
| 1      | 14.686        | BB   | 0.7652      | 2.51427e4    | 509.98615    | 97.4042 |
| 2      | 22.551        | BB   | 1.3913      | 670.06018    | 7.21651      | 2.5958  |

Totals :                    2.58128e4    517.20266

=====  
 \*\*\* End of Report \*\*\*

**Figure S20.** HPLC spectra of 3ki.

Data File D:\DATA\LJ\LJ-3-46-47\LJ-3-46-47 2020-12-14 20-06-10\010-82-LJ-3-47-RAC.D  
Sample Name: LJ-3-47-RAC

```
=====
Acq. Operator   : SYSTEM                      Seq. Line :   10
Sample Operator : SYSTEM
Acq. Instrument : 1260                        Location  :   82
Injection Date  : 12/14/2020 11:16:35 PM      Inj       :    1
                                           Inj Volume: 5.000 µl
Acq. Method     : D:\Data\LJ\LJ-3-46-47\LJ-3-46-47 2020-12-14 20-06-10\P1-90-10-1.OML-5UL-
                220NM-254NM-60MIN.M
Last changed    : 8/22/2020 11:49:17 PM by SYSTEM
Analysis Method : D:\Data\LJ\LJ-3-46-47\LJ-3-46-47 2020-12-14 20-06-10\P1-90-10-1.OML-5UL-
                220NM-254NM-60MIN.M (Sequence Method)
Last changed    : 12/15/2020 1:23:51 AM by SYSTEM
                (modified after loading)
=====
```

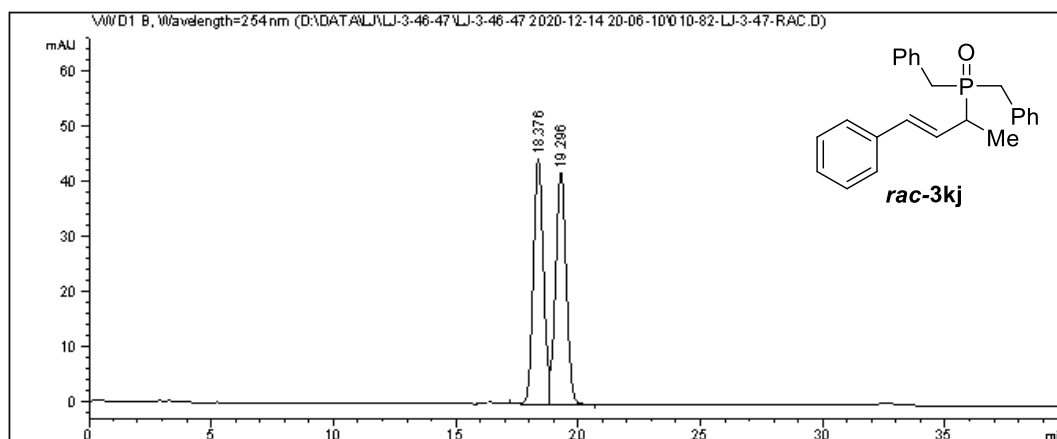

=====  
Area Percent Report  
=====

Sorted By : Signal  
Multiplier : 1.0000  
Dilution : 1.0000  
Do not use Multiplier & Dilution Factor with ISTDs

Signal 1: WVD1 B, Wavelength=254 nm

| Peak # | RetTime [min] | Type | Width [min] | Area [mAU*s] | Height [mAU] | Area %  |
|--------|---------------|------|-------------|--------------|--------------|---------|
| 1      | 18.376        | BV   | 0.4521      | 1288.17224   | 44.45259     | 50.0087 |
| 2      | 19.296        | VB   | 0.4770      | 1287.72363   | 42.08435     | 49.9913 |

Totals : 2575.89587 86.53694

=====  
\*\*\* End of Report \*\*\*

Figure S221. HPLC spectra of *rac-3kj*.

Data File D:\Data\LJ\LJ-3-46-47\LJ-3-46-47 2020-12-14 20-06-10\011-72-LJ-3-47.D  
 Sample Name: LJ-3-47

```

=====
Acq. Operator   : SYSTEM                      Seq. Line :   11
Sample Operator : SYSTEM
Acq. Instrument : 1260                      Location  :   72
Injection Date  : 12/15/2020 12:17:17 AM    Inj       :    1
                                           Inj Volume: 5.000 µl
Acq. Method     : D:\Data\LJ\LJ-3-46-47\LJ-3-46-47 2020-12-14 20-06-10\P1-90-10-1.OML-5UL-
                220NM-254NM-60MIN.M
Last changed    : 12/15/2020 1:11:34 AM by SYSTEM
                (modified after loading)
Analysis Method : D:\Data\LJ\LJ-3-46-47\LJ-3-46-47 2020-12-14 20-06-10\P1-90-10-1.OML-5UL-
                220NM-254NM-60MIN.M (Sequence Method)
Last changed    : 12/15/2020 1:25:46 AM by SYSTEM
                (modified after loading)
Additional Info  : Peak(s) manually integrated
=====
  
```

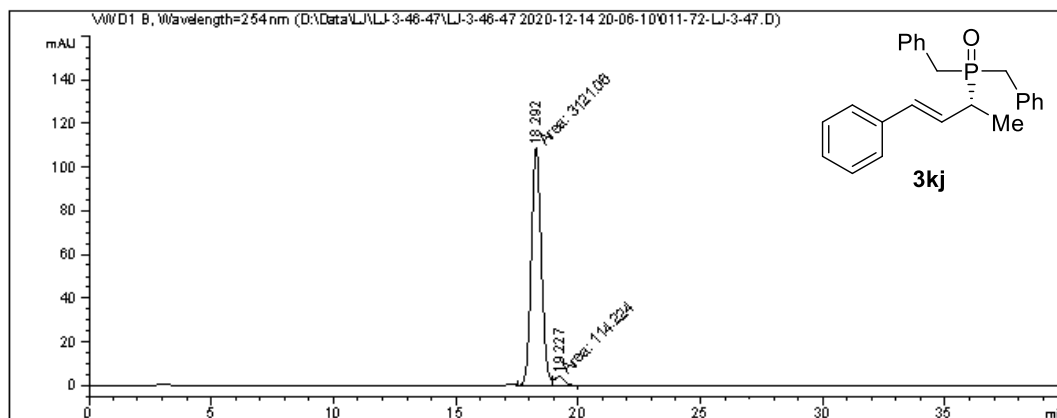

=====  
 Area Percent Report  
 =====

```

Sorted By      :      Signal
Multiplier     :      1.0000
Dilution      :      1.0000
Do not use Multiplier & Dilution Factor with ISTDs
  
```

Signal 1: WVD1 B, Wavelength=254 nm

| Peak # | RetTime [min] | Type | Width [min] | Area [mAU*s] | Height [mAU] | Area %  |
|--------|---------------|------|-------------|--------------|--------------|---------|
| 1      | 18.292        | MF   | 0.4791      | 3121.05933   | 108.56474    | 96.4694 |
| 2      | 19.227        | FM   | 0.4691      | 114.22372    | 4.05869      | 3.5306  |

Totals :                    3235.28305    112.62343

=====  
 \*\*\* End of Report \*\*\*

**Figure S222.** HPLC spectra of **3kj**.



Data File D:\DATA\LJ\LJ-3-43\LJ-3-43 2020-11-27 06-20-30\014-82-LJ-3-43-RAC.D  
 Sample Name: LJ-3-43-RAC

```

=====
Acq. Operator   : SYSTEM                      Seq. Line :   14
Sample Operator : SYSTEM
Acq. Instrument : 1260                      Location  :   82
Injection Date  : 11/27/2020 11:51:29 AM    Inj       :    1
                                           Inj Volume: 5.000 µl
Acq. Method     : D:\Data\LJ\LJ-3-43\LJ-3-43 2020-11-27 06-20-30\P1-90-10-1.OML-5UL-22ONM-
                254NM-20MIN.M
Last changed    : 8/23/2020 2:15:51 AM by SYSTEM
Analysis Method : D:\Data\LJ\LJ-3-43\LJ-3-43 2020-11-27 06-20-30\P1-90-10-1.OML-5UL-22ONM-
                254NM-20MIN.M (Sequence Method)
Last changed    : 11/27/2020 8:11:36 PM by SYSTEM
                (modified after loading)
=====
  
```

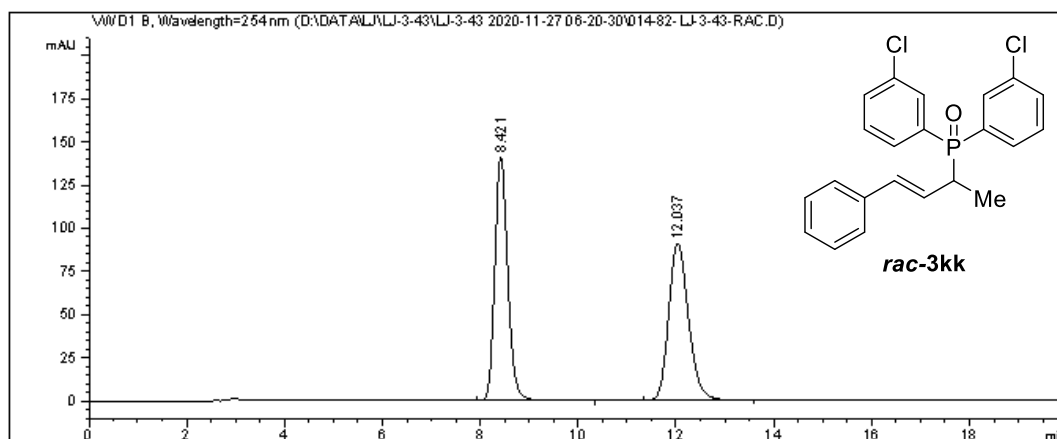

=====  
 Area Percent Report  
 =====

```

Sorted By      :      Signal
Multiplier     :      1.0000
Dilution      :      1.0000
Do not use Multiplier & Dilution Factor with ISTDs
  
```

Signal 1: WWD1 B, Wavelength=254 nm

| Peak # | RetTime [min] | Type | Width [min] | Area [mAU*s] | Height [mAU] | Area %  |
|--------|---------------|------|-------------|--------------|--------------|---------|
| 1      | 8.421         | BB   | 0.2832      | 2566.82593   | 140.47169    | 50.2088 |
| 2      | 12.037        | BB   | 0.4341      | 2545.47729   | 90.52120     | 49.7912 |

Totals :                    5112.30322   230.99290

=====  
 \*\*\* End of Report \*\*\*

**Figure S223.** HPLC spectra of *rac-3kk*.

Data File D:\Data\LJ\LJ-3-43\LJ-3-43 2020-11-27 06-20-30\013-81-LJ-3-43.D  
 Sample Name: LJ-3-43

```

=====
Acq. Operator   : SYSTEM                      Seq. Line :   13
Sample Operator : SYSTEM
Acq. Instrument : 1260                       Location  :   81
Injection Date  : 11/27/2020 11:30:45 AM     Inj       :    1
                                           Inj Volume: 5.000 µl
Acq. Method     : D:\Data\LJ\LJ-3-43\LJ-3-43 2020-11-27 06-20-30\P1-90-10-1.OML-5UL-220NM-
                254NM-20MIN.M
Last changed    : 8/23/2020 2:15:51 AM by SYSTEM
Analysis Method : D:\Data\LJ\LJ-3-43\LJ-3-43 2020-11-27 06-20-30\P1-90-10-1.OML-5UL-220NM-
                254NM-20MIN.M (Sequence Method)
Last changed    : 11/27/2020 8:13:12 PM by SYSTEM
                (modified after loading)
Additional Info  : Peak(s) manually integrated
=====
  
```

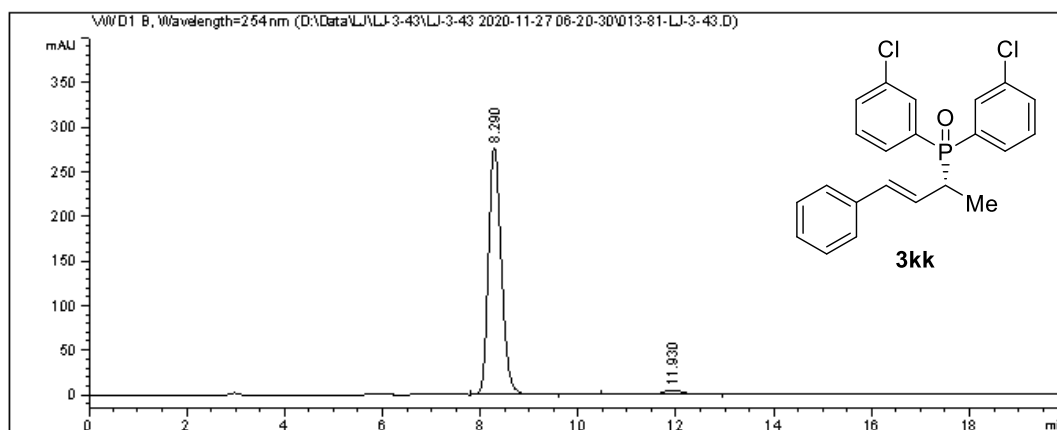

=====  
 Area Percent Report  
 =====

```

Sorted By      :      Signal
Multiplier     :      1.0000
Dilution       :      1.0000
Do not use Multiplier & Dilution Factor with ISTDs
  
```

Signal 1: VWD1 B, Wavelength=254 nm

| Peak # | RetTime [min] | Type | Width [min] | Area [mAU*s] | Height [mAU] | Area %  |
|--------|---------------|------|-------------|--------------|--------------|---------|
| 1      | 8.290         | BB   | 0.2808      | 5053.92236   | 277.09402    | 96.7203 |
| 2      | 11.930        | VB R | 0.4950      | 171.37312    | 5.11349      | 3.2797  |

Totals :                    5225.29549   282.20752

=====  
 \*\*\* End of Report \*\*\*

**Figure S224.** HPLC spectra of **3kk**.

Data File D:\Data\Le...ZL-WJX-1202\ZL-WJX-1202 2021-12-03 08-02-42\011-51-LJ-3-184-1-RAC.D  
 Sample Name: LJ-3-184-1-RAC

```

=====
Acq. Operator   : SYSTEM                      Seq. Line :   11
Sample Operator : SYSTEM
Acq. Instrument : 1260                       Location  :   51
Injection Date  : 12/3/2021 2:51:10 PM      Inj       :    1
                                           Inj Volume: 5.000 µl
Acq. Method     : D:\Data\Le...ZL-WJX-1202\ZL-WJX-1202 2021-12-03 08-02-42\P2-85-15-0.4ML-
                    SUL-220NM-254NM-180MIN.M
Last changed    : 12/2/2021 10:17:06 PM by SYSTEM
Analysis Method : D:\Data\Le...ZL-WJX-1202\ZL-WJX-1202 2021-12-03 08-02-42\P2-85-15-0.4ML-
                    SUL-220NM-254NM-180MIN.M (Sequence Method)
Last changed    : 12/4/2021 9:11:47 AM by SYSTEM
                    (modified after loading)
Additional Info  : Peak(s) manually integrated
=====
  
```

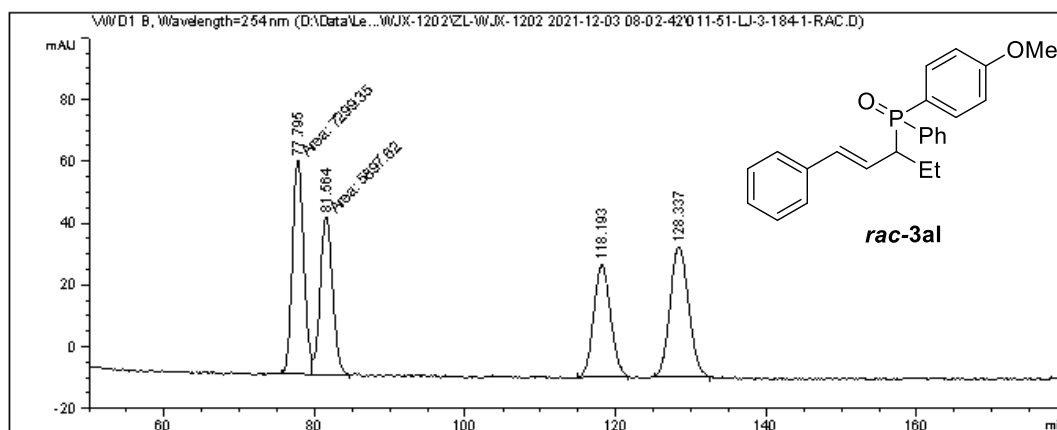

=====  
 Area Percent Report  
 =====

```

Sorted By      :      Signal
Multiplier     :      1.0000
Dilution       :      1.0000
Do not use Multiplier & Dilution Factor with ISTDs
  
```

Signal 1: WWD1 B, Wavelength=254 nm

| Peak # | RetTime [min] | Type | Width [min] | Area [mAU*s] | Height [mAU] | Area %  |
|--------|---------------|------|-------------|--------------|--------------|---------|
| 1      | 77.795        | MF   | 1.7497      | 7299.35010   | 69.53131     | 27.9604 |
| 2      | 81.564        | FM   | 1.9208      | 5897.62158   | 51.17248     | 22.5910 |
| 3      | 118.193       | BB   | 2.0967      | 5670.98242   | 36.45900     | 21.7229 |
| 4      | 128.337       | BB   | 2.1230      | 7238.05859   | 42.11659     | 27.7256 |

Totals :                                    2.61060e4    199.27939

**Figure S225.** HPLC spectra of *rac-3al* (reported as a mixture of diastereomers).

Data File D:\Data\Lei-ZL\ZL-WJX-1202\ZL-WJX-1202 2021-12-03 08-02-42\012-52-LJ-3-184-1.D  
 Sample Name: LJ-3-184-1

```

=====
Acq. Operator   : SYSTEM                      Seq. Line :   12
Sample Operator : SYSTEM
Acq. Instrument : 1260                      Location  :   52
Injection Date  : 12/3/2021 5:51:53 PM      Inj       :    1
                                           Inj Volume: 5.000 µl
Acq. Method     : D:\Data\Lei-ZL\ZL-WJX-1202\ZL-WJX-1202 2021-12-03 08-02-42\P2-85-15-0.4ML-
                    SUL-220NM-254NM-180MIN.M
Last changed    : 12/2/2021 10:17:06 PM by SYSTEM
Analysis Method : D:\Data\Lei-ZL\ZL-WJX-1202\ZL-WJX-1202 2021-12-03 08-02-42\P2-85-15-0.4ML-
                    SUL-220NM-254NM-180MIN.M (Sequence Method)
Last changed    : 12/4/2021 9:21:32 AM by SYSTEM
Additional Info  : Peak(s) manually integrated
=====
  
```

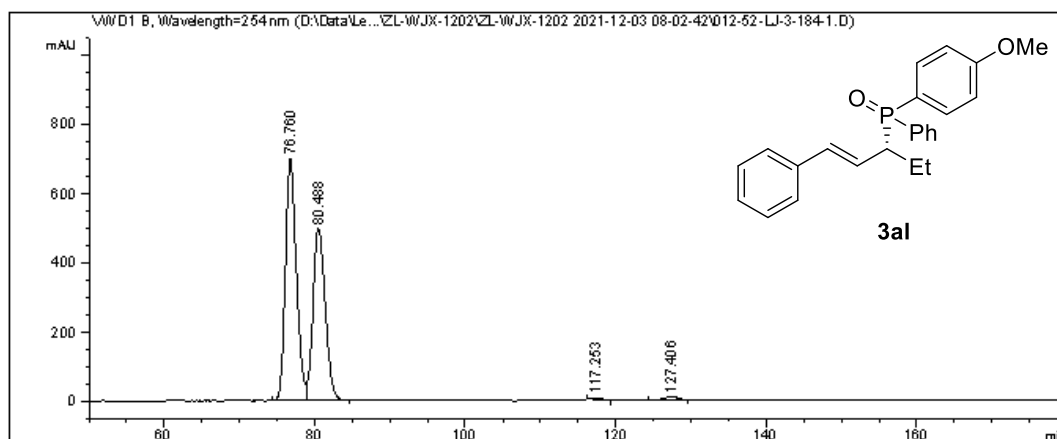

=====  
 Area Percent Report  
 =====

```

Sorted By      :      Signal
Multiplier     :      1.0000
Dilution      :      1.0000
Do not use Multiplier & Dilution Factor with ISTDs
  
```

Signal 1: WWD1 B, Wavelength=254 nm

| Peak # | RetTime [min] | Type | Width [min] | Area [mAU*s] | Height [mAU] | Area %  |
|--------|---------------|------|-------------|--------------|--------------|---------|
| 1      | 76.760        | BV   | 1.5672      | 7.07890e4    | 699.16571    | 54.6711 |
| 2      | 80.488        | VB   | 1.7111      | 5.70595e4    | 496.38150    | 44.0676 |
| 3      | 117.253       | BB   | 1.2645      | 429.20178    | 4.38280      | 0.3315  |
| 4      | 127.406       | BB   | 1.7488      | 1203.95593   | 8.19103      | 0.9298  |

Totals :                                    1.29482e5   1208.12105

**Figure S226.** HPLC spectra of **3al** (reported as a mixture of diastereomers).

Data File D:\DATA\LJ\LJ-3-178-182\LJ-3-178-182 2021-11-30 21-16-46\011-56-LJ-3-181-RAC.D  
 Sample Name: LJ-3-181-RAC

```

=====
Acq. Operator   : SYSTEM                      Seq. Line :   11
Sample Operator : SYSTEM
Acq. Instrument : 1260                        Location  :   56
Injection Date  : 12/1/2021 1:37:46 AM       Inj       :    1
                                           Inj Volume: 5.000 µl
Acq. Method     : D:\Data\LJ\LJ-3-178-182\LJ-3-178-182 2021-11-30 21-16-46\P2-94-6-0.3ML-5UL-
                220NM-254NM-70MIN.M
Last changed    : 11/30/2021 9:34:00 PM by SYSTEM
Analysis Method : D:\Data\LJ\LJ-3-178-182\LJ-3-178-182 2021-11-30 21-16-46\P2-94-6-0.3ML-5UL-
                220NM-254NM-70MIN.M (Sequence Method)
Last changed    : 12/1/2021 4:52:05 AM by SYSTEM
                (modified after loading)
Additional Info  : Peak(s) manually integrated
=====
  
```

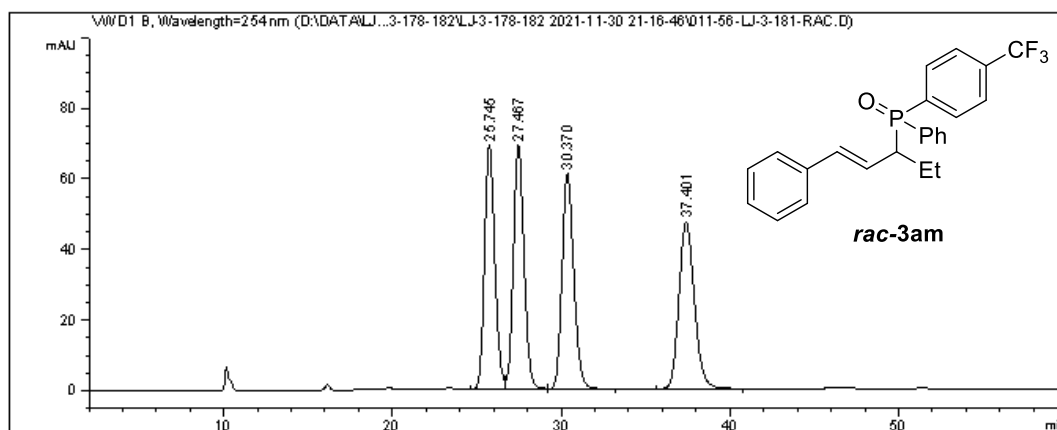

=====  
 Area Percent Report  
 =====

```

Sorted By      :      Signal
Multiplier     :      1.0000
Dilution      :      1.0000
Do not use Multiplier & Dilution Factor with ISTDs
  
```

Signal 1: WVD1 B, Wavelength=254 nm

| Peak # | RetTime [min] | Type | Width [min] | Area [mAU*s] | Height [mAU] | Area %  |
|--------|---------------|------|-------------|--------------|--------------|---------|
| 1      | 25.745        | BV   | 0.6574      | 2927.42236   | 69.21364     | 24.4981 |
| 2      | 27.467        | VB   | 0.6830      | 3030.03589   | 69.18124     | 25.3568 |
| 3      | 30.370        | BB   | 0.7534      | 2978.47266   | 61.02335     | 24.9253 |
| 4      | 37.401        | BB   | 0.9739      | 3013.66919   | 47.38910     | 25.2198 |

Totals :                                    1.19496e4    246.80732

**Figure S227.** HPLC spectra of *rac*-3am (reported as a mixture of diastereomers).

Data File D:\Data\LJ\LJ-3-178-182\LJ-3-178-182 2021-11-30 21-16-46\010-55-LJ-3-181.D  
 Sample Name: LJ-3-181

```

=====
Acq. Operator   : SYSTEM                      Seq. Line :   10
Sample Operator : SYSTEM
Acq. Instrument : 1260                        Location  :   55
Injection Date  : 12/1/2021 12:27:02 AM      Inj       :    1
                                           Inj Volume: 5.000 µl
Acq. Method     : D:\Data\LJ\LJ-3-178-182\LJ-3-178-182 2021-11-30 21-16-46\P2-94-6-0.3ML-5UL-
                220NM-254NM-70MIN.M
Last changed    : 11/30/2021 9:34:00 PM by SYSTEM
Analysis Method : D:\Data\LJ\LJ-3-178-182\LJ-3-178-182 2021-11-30 21-16-46\P2-94-6-0.3ML-5UL-
                220NM-254NM-70MIN.M (Sequence Method)
Last changed    : 12/1/2021 4:59:37 AM by SYSTEM
Additional Info  : Peak(s) manually integrated
=====
  
```

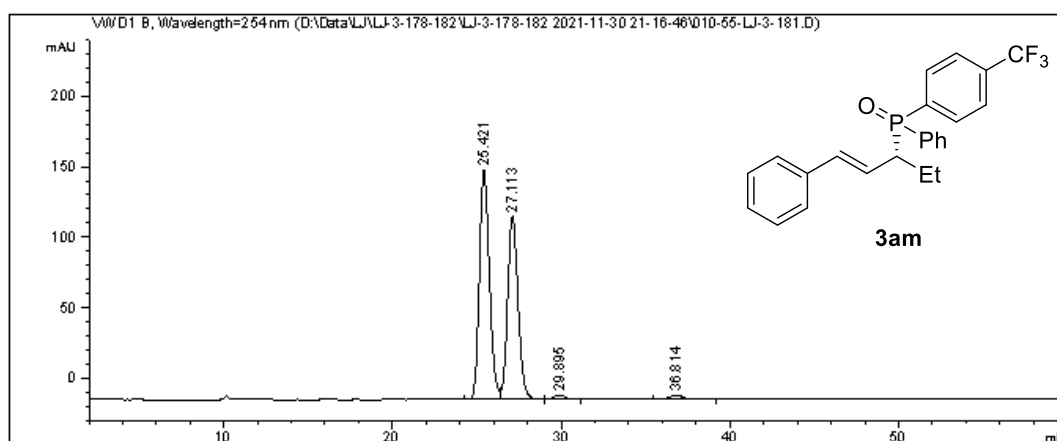

=====  
 Area Percent Report  
 =====

```

Sorted By      :      Signal
Multiplier     :      1.0000
Dilution      :      1.0000
Do not use Multiplier & Dilution Factor with ISTDs
  
```

Signal 1: VWD1 B, Wavelength=254 nm

| Peak # | RetTime [min] | Type | Width [min] | Area [mAU*s] | Height [mAU] | Area %  |
|--------|---------------|------|-------------|--------------|--------------|---------|
| 1      | 25.421        | BV   | 0.6450      | 6762.35156   | 162.68384    | 53.1273 |
| 2      | 27.113        | VB   | 0.6829      | 5642.90283   | 129.86325    | 44.3325 |
| 3      | 29.895        | BB   | 0.7082      | 139.01546    | 2.99115      | 1.0922  |
| 4      | 36.814        | BB   | 0.9868      | 184.31906    | 2.81894      | 1.4481  |

Totals :                                    1.27286e4    298.35718

**Figure S228.** HPLC spectra of **3am** (reported as a mixture of diastereomers).

Data File D:\Data\LJ\LJ-3-172-175\LJ-3-172-175 2021-11-22 21-42-48\008-56-LJ-3-173-RAC.D  
 Sample Name: LJ-3-173-RAC

```

=====
Acq. Operator   : SYSTEM                      Seq. Line :    8
Sample Operator : SYSTEM
Acq. Instrument : 1260                        Location  :   56
Injection Date  : 11/23/2021 1:18:50 AM      Inj       :    1
                                           Inj Volume: 5.000 µl

Acq. Method     : D:\Data\LJ\LJ-3-172-175\LJ-3-172-175 2021-11-22 21-42-48\P1-85-15-1.OML-5UL
                  -220NM-254NM-40MIN.M
Last changed    : 11/21/2020 8:41:36 PM by SYSTEM
Analysis Method : D:\Data\LJ\LJ-3-172-175\LJ-3-172-175 2021-11-22 21-42-48\P1-85-15-1.OML-5UL
                  -220NM-254NM-40MIN.M (Sequence Method)
Last changed    : 11/30/2021 10:12:27 PM by SYSTEM
                  (modified after loading)
Additional Info  : Peak(s) manually integrated
=====
  
```

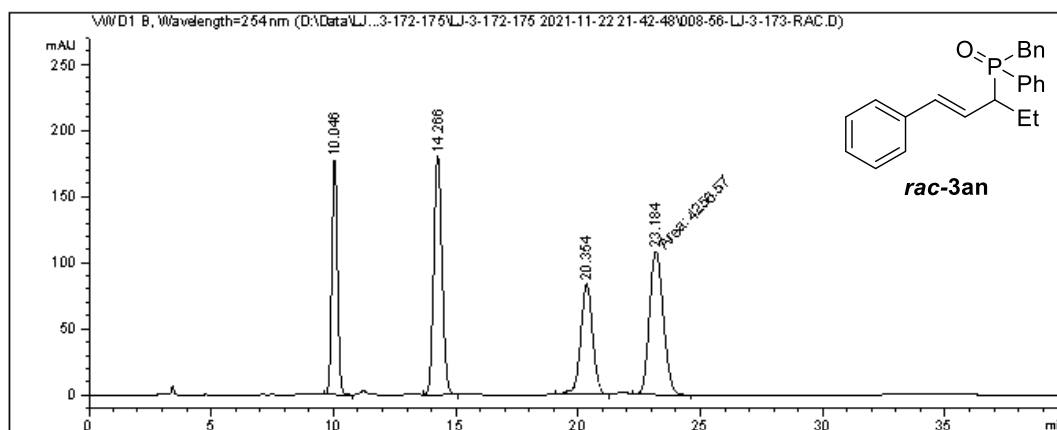

=====  
 Area Percent Report  
 =====

```

Sorted By      :      Signal
Multiplier     :      1.0000
Dilution       :      1.0000
Do not use Multiplier & Dilution Factor with ISTDs
  
```

Signal 1: WVD1 B, Wavelength=254 nm

| Peak # | RetTime [min] | Type | Width [min] | Area [mAU*s] | Height [mAU] | Area %  |
|--------|---------------|------|-------------|--------------|--------------|---------|
| 1      | 10.046        | BB   | 0.2479      | 2826.78516   | 177.36853    | 19.8758 |
| 2      | 14.266        | BB   | 0.3697      | 4257.12500   | 180.12068    | 29.9329 |
| 3      | 20.354        | BB   | 0.5346      | 2881.76514   | 83.51828     | 20.2624 |
| 4      | 23.184        | FM   | 0.6543      | 4256.56836   | 108.41961    | 29.9290 |

Totals :                                    1.42222e4    549.42710

**Figure S229.** HPLC spectra of *rac-3an* (reported as a mixture of diastereomers).

Data File D:\Data\LJ\LJ-3-172-175\LJ-3-172-175 2021-11-22 21-42-48\007-55-LJ-3-173.D  
 Sample Name: LJ-3-173

```

=====
Acq. Operator   : SYSTEM                      Seq. Line :    7
Sample Operator : SYSTEM
Acq. Instrument : 1260                        Location  :   55
Injection Date  : 11/23/2021 12:38:07 AM      Inj       :    1
                                           Inj Volume: 5.000 µl
Acq. Method     : D:\Data\LJ\LJ-3-172-175\LJ-3-172-175 2021-11-22 21-42-48\P1-85-15-1.OML-5UL
                  -220NM-254NM-40MIN.M
Last changed    : 11/21/2020 8:41:36 PM by SYSTEM
Analysis Method : D:\Data\LJ\LJ-3-172-175\LJ-3-172-175 2021-11-22 21-42-48\P1-85-15-1.OML-5UL
                  -220NM-254NM-40MIN.M (Sequence Method)
Last changed    : 12/15/2021 3:57:56 AM by SYSTEM
                  (modified after loading)
Additional Info  : Peak(s) manually integrated
=====
  
```

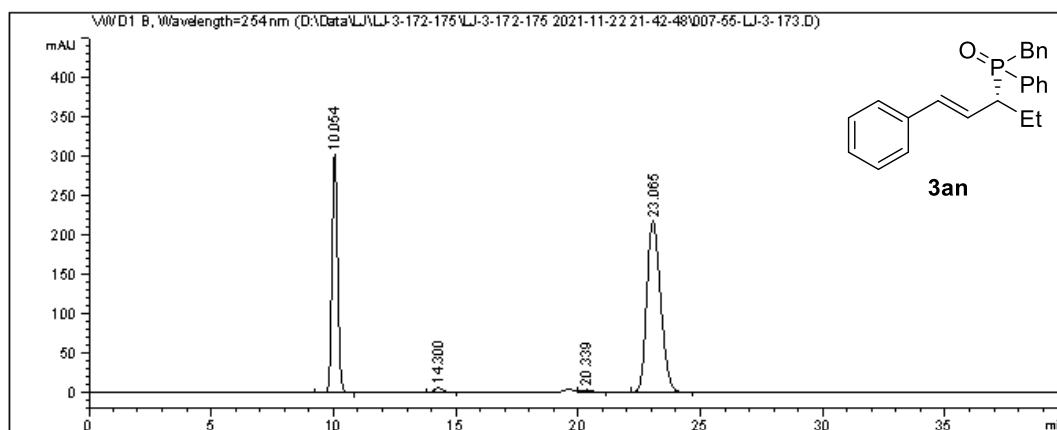

=====  
 Area Percent Report  
 =====

```

Sorted By      :      Signal
Multiplier     :      1.0000
Dilution       :      1.0000
Do not use Multiplier & Dilution Factor with ISTDs
  
```

Signal 1: WWD1 B, Wavelength=254 nm

| Peak # | RetTime [min] | Type | Width [min] | Area [mAU*s] | Height [mAU] | Area %  |
|--------|---------------|------|-------------|--------------|--------------|---------|
| 1      | 10.054        | VB R | 0.2490      | 4829.73291   | 301.40018    | 35.4779 |
| 2      | 14.300        | BB   | 0.3689      | 135.81970    | 5.64183      | 0.9977  |
| 3      | 20.339        | VB   | 0.4981      | 108.77480    | 3.32131      | 0.7990  |
| 4      | 23.065        | BB   | 0.6176      | 8539.01855   | 216.76474    | 62.7253 |

Totals :                                    1.36133e4    527.12806

**Figure S230.** HPLC spectra of **3an** (reported as a mixture of diastereomers).



Data File D:\DATA\LJ\LJ-3-183-184\LJ-3-183-184 2021-12-02 22-20-47\002-51-LJ-3-183-2-RAC.D  
 Sample Name: LJ-3-183-2-RAC

```

=====
Acq. Operator   : SYSTEM                      Seq. Line :    2
Sample Operator : SYSTEM
Acq. Instrument : 1260                      Location  :   51
Injection Date  : 12/2/2021 10:35:02 PM      Inj       :    1
                                           Inj Volume: 5.000 µl
Acq. Method     : D:\Data\LJ\LJ-3-183-184\LJ-3-183-184 2021-12-02 22-20-47\P1-80-20-0.3ML-5UL
                  -220NM-254NM-100MIN.M
Last changed    : 12/2/2021 10:14:26 PM by SYSTEM
Analysis Method : D:\Data\LJ\LJ-3-183-184\LJ-3-183-184 2021-12-02 22-20-47\P1-80-20-0.3ML-5UL
                  -220NM-254NM-100MIN.M (Sequence Method)
Last changed    : 12/4/2021 9:23:09 AM by SYSTEM
                  (modified after loading)
Additional Info  : Peak(s) manually integrated
=====
  
```

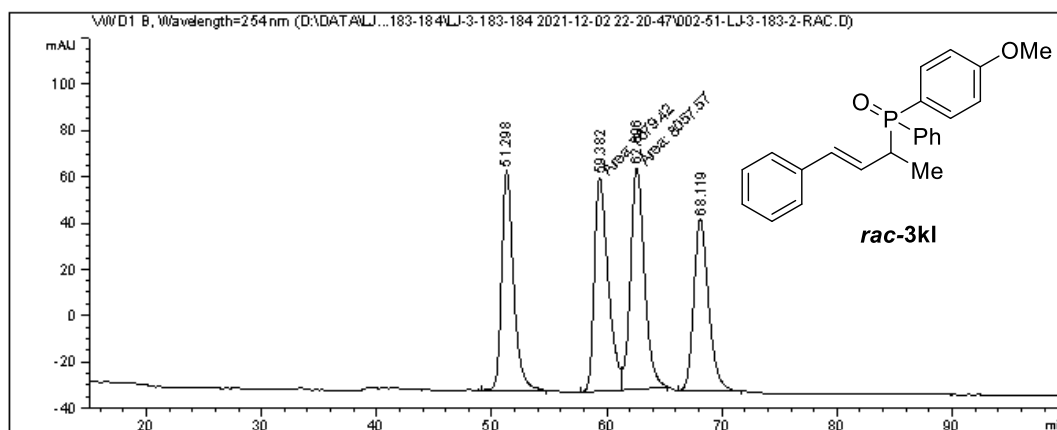

=====  
 Area Percent Report  
 =====

```

Sorted By      :      Signal
Multiplier     :      1.0000
Dilution      :      1.0000
Do not use Multiplier & Dilution Factor with ISTDs
  
```

Signal 1: WVD1 B, Wavelength=254 nm

| Peak # | RetTime [min] | Type | Width [min] | Area [mAU*s] | Height [mAU] | Area %  |
|--------|---------------|------|-------------|--------------|--------------|---------|
| 1      | 51.298        | BB   | 1.0836      | 6820.30273   | 95.00307     | 23.3709 |
| 2      | 59.382        | MF   | 1.3888      | 7679.42578   | 92.15852     | 26.3148 |
| 3      | 62.606        | FM   | 1.4069      | 8057.56592   | 95.45222     | 27.6106 |
| 4      | 68.119        | BB   | 1.3641      | 6625.58594   | 74.03111     | 22.7037 |

Totals :                                    2.91829e4    356.64492

**Figure S231.** HPLC spectra of *rac-3kl* (reported as a mixture of diastereomers).

Data File D:\Data\LJ\LJ-3-183-184\LJ-3-183-184 2021-12-02 22-20-47\003-52-LJ-3-183-2.D  
 Sample Name: LJ-3-183-2

```

=====
Acq. Operator   : SYSTEM                      Seq. Line :    3
Sample Operator : SYSTEM
Acq. Instrument : 1260                        Location  :   52
Injection Date  : 12/3/2021 12:15:45 AM      Inj       :    1
                                           Inj Volume: 5.000 µl

Acq. Method     : D:\Data\LJ\LJ-3-183-184\LJ-3-183-184 2021-12-02 22-20-47\P1-80-20-0.3ML-5UL
                  -220NM-254NM-100MIN.M
Last changed    : 12/2/2021 10:14:26 PM by SYSTEM
Analysis Method : D:\Data\LJ\LJ-3-183-184\LJ-3-183-184 2021-12-02 22-20-47\P1-80-20-0.3ML-5UL
                  -220NM-254NM-100MIN.M (Sequence Method)
Last changed    : 12/15/2021 4:03:06 AM by SYSTEM
                  (modified after loading)
Additional Info  : Peak(s) manually integrated
=====
  
```

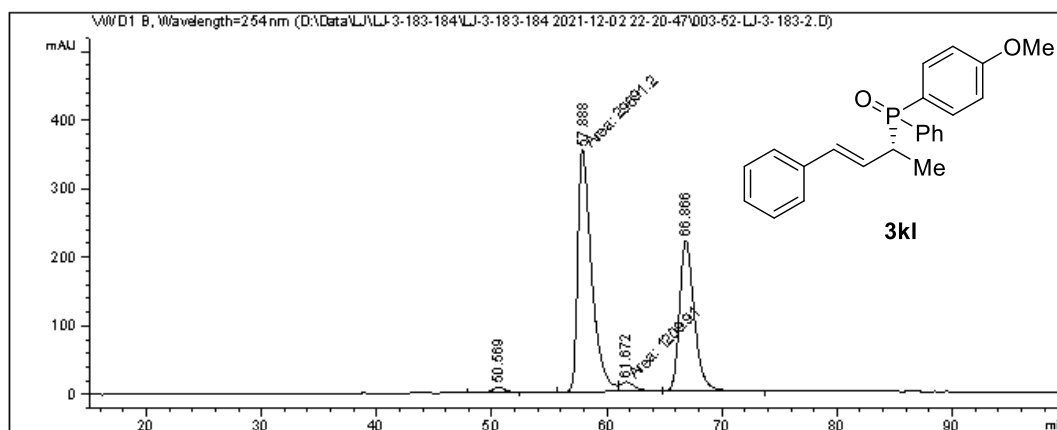

=====  
 Area Percent Report  
 =====

```

Sorted By      :      Signal
Multiplier     :      1.0000
Dilution       :      1.0000
Do not use Multiplier & Dilution Factor with ISTDs
  
```

Signal 1: WVD1 B, Wavelength=254 nm

| Peak # | RetTime [min] | Type | Width [min] | Area [mAU*s] | Height [mAU] | Area %  |
|--------|---------------|------|-------------|--------------|--------------|---------|
| 1      | 50.569        | BB   | 1.0631      | 549.42023    | 7.67573      | 1.0776  |
| 2      | 57.888        | MF   | 1.4039      | 2.96912e4    | 352.49017    | 58.2340 |
| 3      | 61.672        | FM   | 1.4777      | 1209.90979   | 13.64621     | 2.3730  |
| 4      | 66.866        | BB   | 1.3697      | 1.95355e4    | 219.62827    | 38.3154 |

Totals :                                    5.09860e4    593.44038

**Figure S232.** HPLC spectra of **3kl** (reported as a mixture of diastereomers).

Data File D:\DATA\LJ\LJ-3-178-182\LJ-3-178-182 2021-11-30 21-16-46\007-54-LJ-3-182-RAC.D  
 Sample Name: LJ-3-182-RAC

```

=====
Acq. Operator   : SYSTEM                               Seq. Line :    7
Sample Operator : SYSTEM
Acq. Instrument : 1260                                 Location  :   54
Injection Date  : 11/30/2021 11:14:35 PM              Inj       :    1
                                                    Inj Volume: 5.000 µl
Acq. Method     : D:\Data\LJ\LJ-3-178-182\LJ-3-178-182 2021-11-30 21-16-46\P3-85-15-1.OML-5UL
                  -220NM-254NM-40MIN.M
Last changed    : 11/30/2021 9:25:06 PM by SYSTEM
Analysis Method : D:\Data\LJ\LJ-3-178-182\LJ-3-178-182 2021-11-30 21-16-46\P3-85-15-1.OML-5UL
                  -220NM-254NM-40MIN.M (Sequence Method)
Last changed    : 12/1/2021 4:34:52 AM by SYSTEM
                  (modified after loading)
=====
  
```

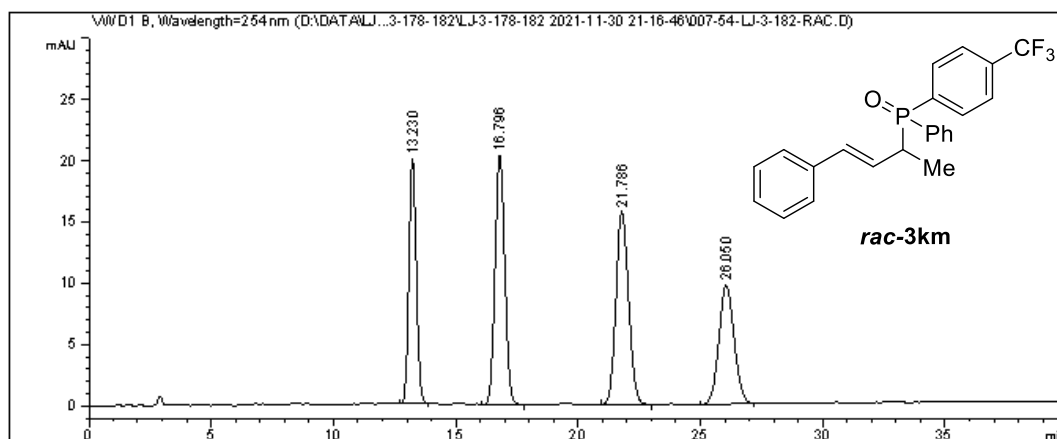

=====  
 Area Percent Report  
 =====

```

Sorted By      :      Signal
Multiplier     :      1.0000
Dilution      :      1.0000
Do not use Multiplier & Dilution Factor with ISTDs
  
```

Signal 1: WWD1 B, Wavelength=254 nm

| Peak # | RetTime [min] | Type | Width [min] | Area [mAU*s] | Height [mAU] | Area %  |
|--------|---------------|------|-------------|--------------|--------------|---------|
| 1      | 13.230        | BB   | 0.3302      | 420.33923    | 19.91744     | 21.3994 |
| 2      | 16.796        | BB   | 0.4267      | 558.74255    | 20.32564     | 28.4455 |
| 3      | 21.786        | BB   | 0.5551      | 562.65295    | 15.73732     | 28.6446 |
| 4      | 26.050        | BB   | 0.6710      | 422.52240    | 9.68475      | 21.5105 |

Totals :                    1964.25714    65.66514

**Figure S233.** HPLC spectra of *rac-3km* (reported as a mixture of diastereomers).

Data File D:\DATA\LJ\LJ-3-178-182\LJ-3-178-182 2021-11-30 21-16-46\006-53-LJ-3-182.D  
 Sample Name: LJ-3-182

```

=====
Acq. Operator   : SYSTEM                      Seq. Line :    6
Sample Operator : SYSTEM
Acq. Instrument : 1260                      Location  :   53
Injection Date  : 11/30/2021 10:33:51 PM      Inj       :    1
                                           Inj Volume: 5.000 µl
Acq. Method     : D:\Data\LJ\LJ-3-178-182\LJ-3-178-182 2021-11-30 21-16-46\P3-85-15-1.OML-5UL
                  -220NM-254NM-40MIN.M
Last changed    : 11/30/2021 9:25:06 PM by SYSTEM
Analysis Method : D:\Data\LJ\LJ-3-178-182\LJ-3-178-182 2021-11-30 21-16-46\P3-85-15-1.OML-5UL
                  -220NM-254NM-40MIN.M (Sequence Method)
Last changed    : 12/15/2021 3:54:54 AM by SYSTEM
                  (modified after loading)
Additional Info : Peak(s) manually integrated
=====
  
```

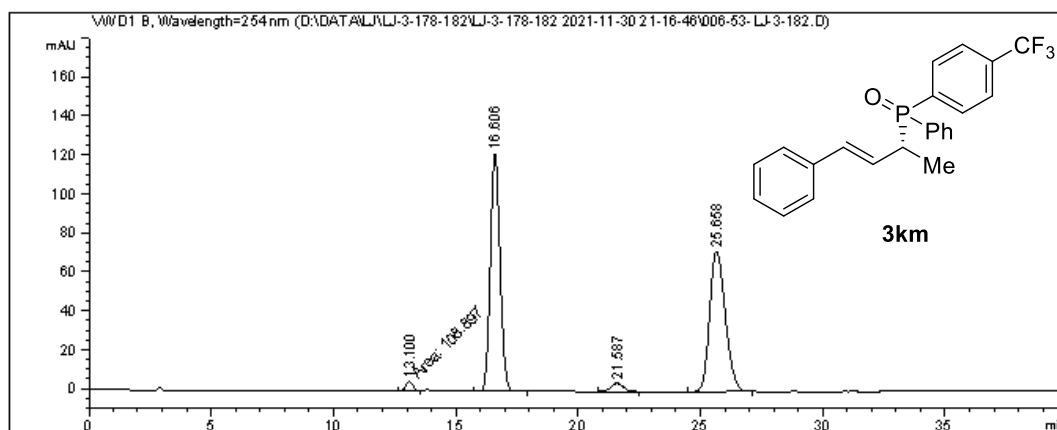

=====  
 Area Percent Report  
 =====

```

Sorted By      :      Signal
Multiplier     :      1.0000
Dilution       :      1.0000
Do not use Multiplier & Dilution Factor with ISTDs
  
```

Signal 1: WWD1 B, Wavelength=254 nm

| Peak # | RetTime [min] | Type | Width [min] | Area [mAU*s] | Height [mAU] | Area %  |
|--------|---------------|------|-------------|--------------|--------------|---------|
| 1      | 13.100        | MF   | 0.3559      | 108.89713    | 5.09988      | 1.5992  |
| 2      | 16.606        | BB   | 0.4241      | 3334.39648   | 122.28763    | 48.9656 |
| 3      | 21.587        | BB   | 0.5479      | 153.75826    | 4.33413      | 2.2579  |
| 4      | 25.658        | BB   | 0.6863      | 3212.61450   | 72.03767     | 47.1773 |

Totals :                                    6809.66637    203.75930

**Figure S234.** HPLC spectra of **3km** (reported as a mixture of diastereomers).

Data File D:\DATA\LJ\LJ-3-172-175\LJ-3-172-175 2021-11-22 21-42-48\004-52-LJ-3-172-1-RAC.D  
 Sample Name: LJ-3-172-1-RAC

```

=====
Acq. Operator   : SYSTEM                      Seq. Line :    4
Sample Operator : SYSTEM
Acq. Instrument : 1260                      Location  :   52
Injection Date  : 11/22/2021 10:55:55 PM    Inj       :    1
                                           Inj Volume: 5.000 µl
Acq. Method     : D:\Data\LJ\LJ-3-172-175\LJ-3-172-175 2021-11-22 21-42-48\P1-85-15-1.OML-5UL
                  -220NM-254NM-40MIN.M
Last changed    : 11/21/2020 8:41:36 PM by SYSTEM
Analysis Method : D:\Data\LJ\LJ-3-172-175\LJ-3-172-175 2021-11-22 21-42-48\P1-85-15-1.OML-5UL
                  -220NM-254NM-40MIN.M (Sequence Method)
Last changed    : 11/30/2021 9:53:52 PM by SYSTEM
                  (modified after loading)
Additional Info  : Peak(s) manually integrated
=====
  
```

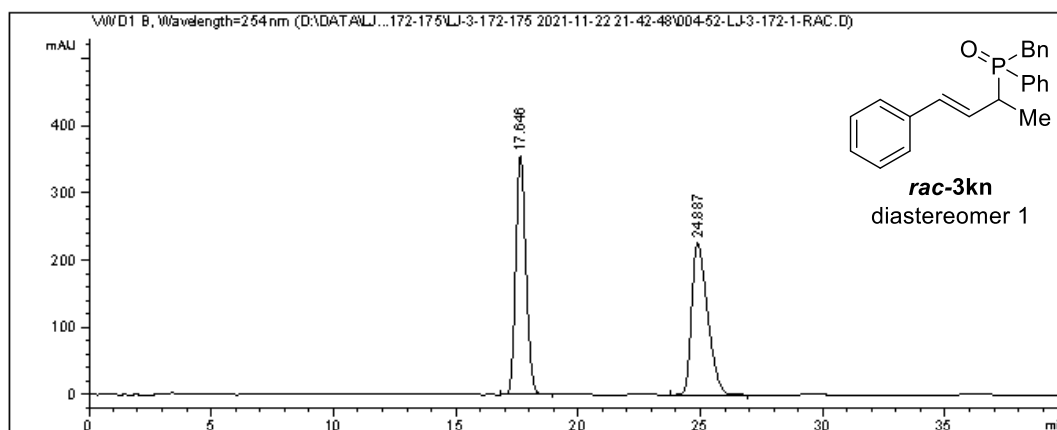

=====  
 Area Percent Report  
 =====

```

Sorted By      :      Signal
Multiplier     :      1.0000
Dilution       :      1.0000
Do not use Multiplier & Dilution Factor with ISTDs
  
```

Signal 1: WVD1 B, Wavelength=254 nm

| Peak # | RetTime [min] | Type | Width [min] | Area [mAU*s] | Height [mAU] | Area %  |
|--------|---------------|------|-------------|--------------|--------------|---------|
| 1      | 17.646        | BB   | 0.4404      | 1.01723e4    | 354.93857    | 50.0216 |
| 2      | 24.887        | BB   | 0.7049      | 1.01635e4    | 225.88161    | 49.9784 |

Totals :                    2.03358e4    580.82018

=====  
 \*\*\* End of Report \*\*\*

**Figure S235.** HPLC spectra of *rac-3kn* diastereomer 1.

Data File D:\Data\LJ\LJ-3-172-175\LJ-3-172-175 2021-11-22 21-42-48\003-51-LJ-3-172-1.D  
 Sample Name: LJ-3-172-1

```

=====
Acq. Operator   : SYSTEM                      Seq. Line :    3
Sample Operator : SYSTEM
Acq. Instrument : 1260                      Location  :   51
Injection Date  : 11/22/2021 10:15:12 PM      Inj       :    1
                                           Inj Volume: 5.000 µl
Acq. Method     : D:\Data\LJ\LJ-3-172-175\LJ-3-172-175 2021-11-22 21-42-48\P1-85-15-1.OML-5UL
                  -220NM-254NM-40MIN.M
Last changed    : 11/21/2020 8:41:36 PM by SYSTEM
Analysis Method : D:\Data\LJ\LJ-3-172-175\LJ-3-172-175 2021-11-22 21-42-48\P1-85-15-1.OML-5UL
                  -220NM-254NM-40MIN.M (Sequence Method)
Last changed    : 11/30/2021 9:53:52 PM by SYSTEM
                  (modified after loading)
=====
  
```

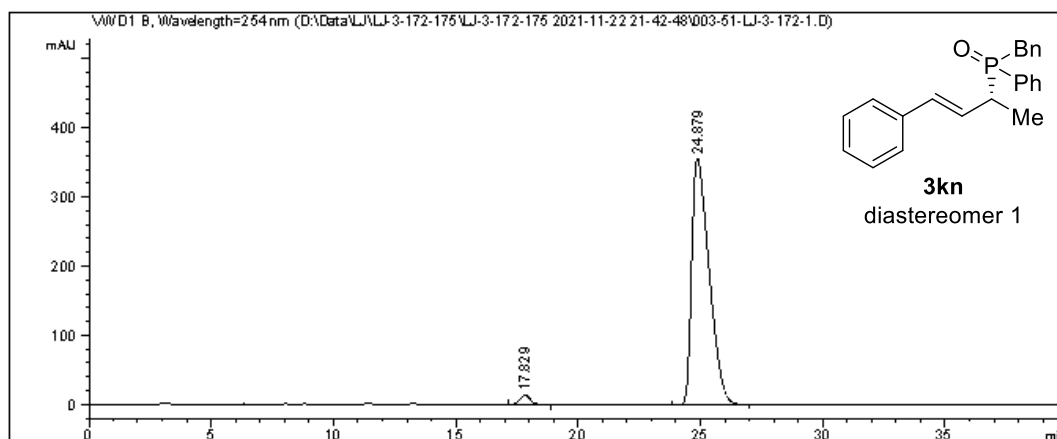

=====  
 Area Percent Report  
 =====

```

Sorted By      : Signal
Multiplier     : 1.0000
Dilution       : 1.0000
Do not use Multiplier & Dilution Factor with ISTDs
  
```

Signal 1: WWD1 B, Wavelength=254 nm

| Peak # | RetTime [min] | Type | Width [min] | Area [mAU*s] | Height [mAU] | Area %  |
|--------|---------------|------|-------------|--------------|--------------|---------|
| 1      | 17.829        | BB   | 0.4540      | 388.21075    | 13.32161     | 2.1605  |
| 2      | 24.879        | BB   | 0.7459      | 1.75801e4    | 356.12793    | 97.8395 |

Totals :                    1.79683e4    369.44954

=====  
 \*\*\* End of Report \*\*\*

**Figure S236.** HPLC spectra of **3kn** diastereomer 1.

Data File D:\DATA\LJ\LJ-3-172-175\LJ-3-172-175 2021-11-22 21-42-48\006-54-LJ-3-172-2-RAC.D  
Sample Name: LJ-3-172-2-RAC

=====

|                 |                          |            |            |
|-----------------|--------------------------|------------|------------|
| Acq. Operator   | : SYSTEM                 | Seq. Line  | : 6        |
| Sample Operator | : SYSTEM                 |            |            |
| Acq. Instrument | : 1260                   | Location   | : 54       |
| Injection Date  | : 11/23/2021 12:07:22 AM | Inj        | : 1        |
|                 |                          | Inj Volume | : 5.000 µl |

Acq. Method : D:\Data\LJ\LJ-3-172-175\LJ-3-172-175 2021-11-22 21-42-48\P1-85-15-1.OML-5UL  
-220NM-254NM-30MIN.M  
Last changed : 10/15/2020 8:06:11 AM by SYSTEM  
Analysis Method : D:\Data\LJ\LJ-3-172-175\LJ-3-172-175 2021-11-22 21-42-48\P1-85-15-1.OML-5UL  
-220NM-254NM-30MIN.M (Sequence Method)  
Last changed : 11/30/2021 10:00:10 PM by SYSTEM  
(modified after loading)  
Additional Info : Peak(s) manually integrated

=====

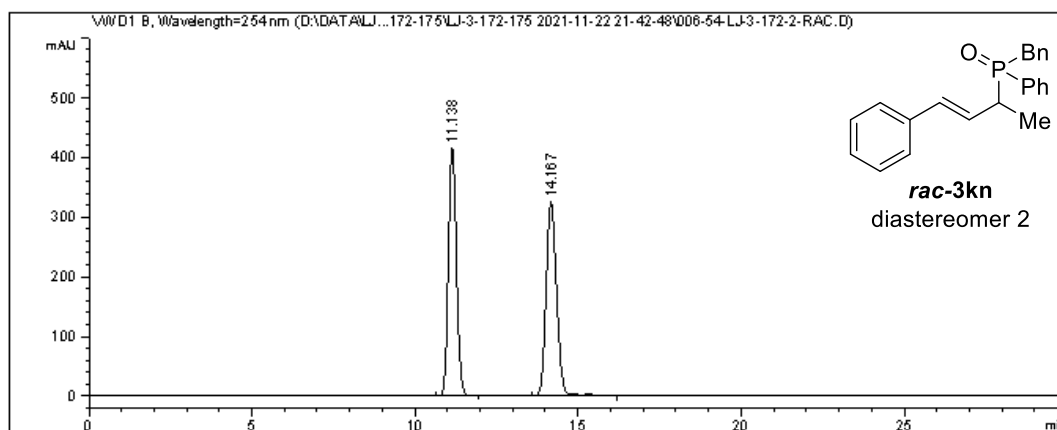

=====  
Area Percent Report  
=====

Sorted By : Signal  
Multiplier : 1.0000  
Dilution : 1.0000  
Do not use Multiplier & Dilution Factor with ISTDs

Signal 1: VWD1 B, Wavelength=254 nm

| Peak # | RetTime [min] | Type | Width [min] | Area [mAU*s] | Height [mAU] | Area %  |
|--------|---------------|------|-------------|--------------|--------------|---------|
| 1      | 11.138        | BB   | 0.2664      | 7134.98096   | 415.35880    | 49.5609 |
| 2      | 14.167        | BV R | 0.3421      | 7261.41455   | 325.44089    | 50.4391 |

Totals : 1.43964e4 740.79968

=====  
\*\*\* End of Report \*\*\*

Figure S237. HPLC spectra of *rac-3kn* diastereomer 2.

Data File D:\Data\LJ\LJ-3-172-175\LJ-3-172-175 2021-11-22 21-42-48\005-53-LJ-3-172-2.D  
 Sample Name: LJ-3-172-2

```

=====
Acq. Operator   : SYSTEM                      Seq. Line :    5
Sample Operator : SYSTEM
Acq. Instrument : 1260                      Location  :   53
Injection Date  : 11/22/2021 11:36:39 PM      Inj       :    1
                                           Inj Volume: 5.000 µl
Acq. Method     : D:\Data\LJ\LJ-3-172-175\LJ-3-172-175 2021-11-22 21-42-48\P1-85-15-1.OML-5UL
                  -220NM-254NM-30MIN.M
Last changed    : 10/15/2020 8:06:11 AM by SYSTEM
Analysis Method : D:\Data\LJ\LJ-3-172-175\LJ-3-172-175 2021-11-22 21-42-48\P1-85-15-1.OML-5UL
                  -220NM-254NM-30MIN.M (Sequence Method)
Last changed    : 11/30/2021 10:01:44 PM by SYSTEM
                  (modified after loading)
=====
  
```

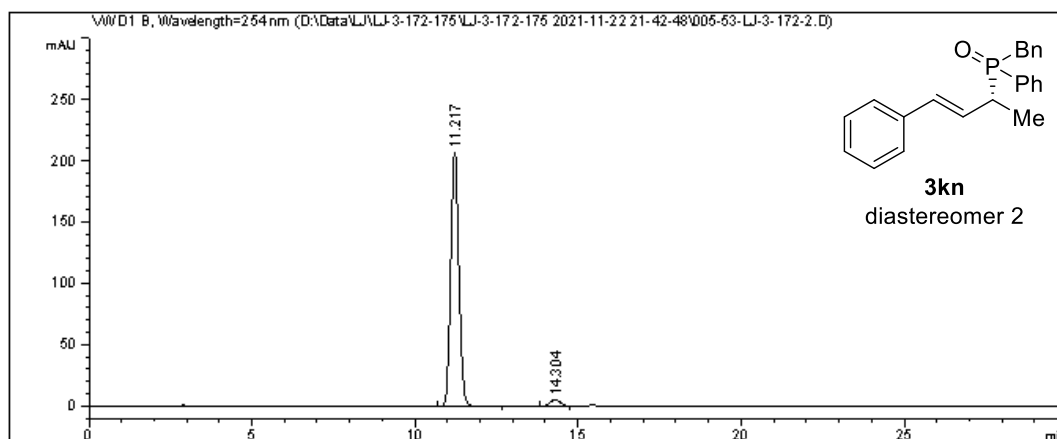

=====  
 Area Percent Report  
 =====

```

Sorted By      :      Signal
Multiplier     :      1.0000
Dilution       :      1.0000
Do not use Multiplier & Dilution Factor with ISTDs
  
```

Signal 1: VWD1 B, Wavelength=254 nm

| Peak # | RetTime [min] | Type | Width [min] | Area [mAU*s] | Height [mAU] | Area %  |
|--------|---------------|------|-------------|--------------|--------------|---------|
| 1      | 11.217        | BB   | 0.2717      | 3616.38062   | 207.07549    | 97.1375 |
| 2      | 14.304        | BB   | 0.3324      | 106.56946    | 5.04674      | 2.8625  |

Totals :                    3722.95007   212.12222

=====  
 \*\*\* End of Report \*\*\*

**Figure S238.** HPLC spectra of **3kn** diastereomer 2.



Data File D:\DATA\LJ\LJ-3-79\LJ-3-79 2021-01-15 01-42-09\006-92-LJ-3-80-RAC.D  
 Sample Name: LJ-3-80-RAC

```

=====
Acq. Operator   : SYSTEM                      Seq. Line :    6
Sample Operator : SYSTEM
Acq. Instrument : 1260                        Location  :   92
Injection Date  : 1/15/2021 3:23:22 AM       Inj       :    1
                                           Inj Volume: 5.000 µl

Acq. Method     : D:\Data\LJ\LJ-3-79\LJ-3-79 2021-01-15 01-42-09\P2-95-5-0.5ML-5UL-220NM-
                254NM-60MIN.M
Last changed    : 1/15/2021 4:00:18 AM by SYSTEM
                (modified after loading)
Analysis Method : D:\Data\LJ\LJ-3-79\LJ-3-79 2021-01-15 01-42-09\P2-95-5-0.5ML-5UL-220NM-
                254NM-60MIN.M (Sequence Method)
Last changed    : 1/15/2021 6:21:22 AM by SYSTEM
                (modified after loading)
Additional Info  : Peak(s) manually integrated
=====
  
```

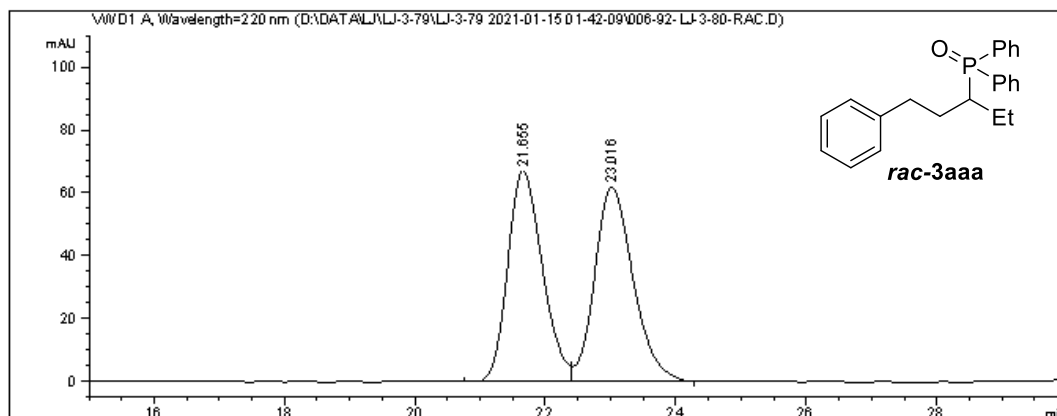

=====  
 Area Percent Report  
 =====

```

Sorted By      :      Signal
Multiplier     :      1.0000
Dilution       :      1.0000
Do not use Multiplier & Dilution Factor with ISTDs
  
```

Signal 1: WWD1 A, Wavelength=220 nm

| Peak # | RetTime [min] | Type | Width [min] | Area [mAU*s] | Height [mAU] | Area %  |
|--------|---------------|------|-------------|--------------|--------------|---------|
| 1      | 21.655        | BV   | 0.5728      | 2490.86865   | 67.45312     | 49.4368 |
| 2      | 23.016        | VB   | 0.6310      | 2547.62671   | 62.05661     | 50.5632 |

Totals :                                    5038.49536    129.50972

=====  
 \*\*\* End of Report \*\*\*

**Figure S239.** HPLC spectra of *rac-3aaa*.

Data File D:\Data\LJ\LJ-3-79\LJ-3-79 2021-01-15 01-42-09\007-93-LJ-3-80.D  
Sample Name: LJ-3-80

```
=====
Acq. Operator   : SYSTEM                      Seq. Line :    7
Sample Operator : SYSTEM
Acq. Instrument : 1260                       Location  :   93
Injection Date  : 1/15/2021 4:01:01 AM       Inj       :    1
                                           Inj Volume: 5.000 µl
Acq. Method     : D:\Data\LJ\LJ-3-79\LJ-3-79 2021-01-15 01-42-09\P2-95-5-0.5ML-5UL-220NM-
                254NM-60MIN.M
Last changed    : 1/15/2021 4:00:18 AM by SYSTEM
Analysis Method : D:\Data\LJ\LJ-3-79\LJ-3-79 2021-01-15 01-42-09\P2-95-5-0.5ML-5UL-220NM-
                254NM-60MIN.M (Sequence Method)
Last changed    : 1/15/2021 6:23:25 AM by SYSTEM
                (modified after loading)
Additional Info : Peak(s) manually integrated
=====
```

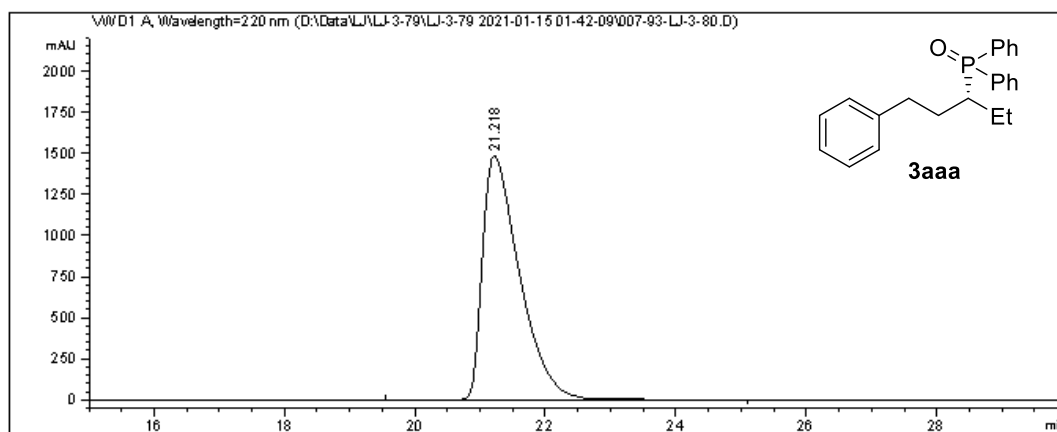

=====  
Area Percent Report  
=====

Sorted By : Signal  
Multiplier : 1.0000  
Dilution : 1.0000  
Do not use Multiplier & Dilution Factor with ISTDs

Signal 1: WVD1 A, Wavelength=220 nm

| Peak # | RetTime [min] | Type | Width [min] | Area [mAU*s] | Height [mAU] | Area %   |
|--------|---------------|------|-------------|--------------|--------------|----------|
| 1      | 21.218        | VB R | 0.6017      | 5.87598e4    | 1484.88403   | 100.0000 |

Totals : 5.87598e4 1484.88403

=====  
\*\*\* End of Report \*\*\*

Figure S240. HPLC spectra of 3aaa.
